# Supplementary material for: Comparison of gene expression profiles between human erythroid cells derived from fetal liver and adult peripheral blood
Source: PeerJ. 2018 Aug 31;6:e5527. doi: 10.7717/peerj.5527 (PMC6120446; doi:10.7717/peerj.5527)
Supplement: Table S3 — The list of enriched biological pathways and GO terms obtained from the ToppFun program using genes differentially expressed between fetal liver (FL) and adult peripheral blood (AB) erythroblasts is displayed separately for FL up-regulated and AB up-regulated gene groups. GO terms are separated into biological process (BP), molecular function (MF), cellular component (CC). The pathway/GO p-value and q-value are reported along with the list of genes associated with each pathway/GO term. [file peerj-06-5527-s008.xlsx]

## Sheet: pathway_FL
ID	Name	Source	p-value	q-value Bonferroni	q-value FDR B&H	q-value FDR B&Y	Hit Count in Query List	Hit Count in Genome	Hit in Query List
1269649	Gene Expression	BioSystems: REACTOME	1.013e-28	2.595e-25	2.595e-25	2.186e-24	267	1844	SEH1L,RPL29,NR2F6,SF3B4,RPN2,FBL,SMNDC1,MARS,BCAS2,MRM1,RPS8,ETF1,SNAPC5,RPS23,RPS25,RPS27A,ADAR,WARS2,CNOT6,CITED2,FARSA,INTS2,UTP15,XPO5,PRMT5,EIF3L,SCO1,MLLT3,POLR1B,EIF3M,NSUN4,CNOT11,XRN2,TYW3,IPO8,NOP56,DCPS,RTCB,NELFCD,SGK1,NOB1,RPP30,LARS,TRMT1,ERI1,TARS2,SKIL,MAPKAPK5,DIS3,THOC5,YARS,RBM22,IGF2BP1,NOP58,IGF2BP3,IARS2,TRMT6,SNRNP48,POLR3B,NOP14,NDC1,DIEXF,POLR3E,TSR1,INTS13,SAP30BP,PPIL1,…
1383085	rRNA processing	BioSystems: REACTOME	1.118e-16	2.864e-13	1.432e-13	1.206e-12	54	203	RPL29,FBL,MRM1,RPS8,RPS23,RPS25,RPS27A,UTP15,NSUN4,XRN2,NOP56,NOB1,RPP30,ERI1,NOP58,NOP14,DIEXF,TSR1,PDCD11,WDR12,UTP6,WDR43,WDR3,DIMT1,RRP36,BYSL,UTP20,NOP2,RPP14,UTP4,PES1,LTV1,EXOSC8,ELAC2,MRM2,EXOSC9,WDR36,NOL11,NOL6,BMS1,PNO1,DKC1,RIOK1,EXOSC3,HEATR1,NOL9,FCF1,UTP18,UTP11,NAT10,ISG20L2,LAS1L,RPL9,RPL12
1268844	Mitochondrial translation elongation	BioSystems: REACTOME	2.905e-15	7.44e-12	2.435e-12	2.052e-11	33	89	MRPL30,MRPL35,MRPS28,MRPL13,MRPL45,MRPL15,MRPS23,MRPS27,MRPL39,MRPL3,MRPS35,TUFM,MRPS21,MRPL50,MRPL58,MRPS15,MRPS9,MRPS5,MRPL40,MRPL32,GFM1,MRPL11,MRPL9,MRPL16,ERAL1,CHCHD1,MRPL20,MRPL47,MRPL53,MRPS16,MRPL2,MRPS7,MRPL46
1268842	Mitochondrial translation	BioSystems: REACTOME	3.803e-15	9.74e-12	2.435e-12	2.052e-11	34	95	MRPL30,MRPL35,MRPS28,MRPL13,MRPL45,MRPL15,MTIF2,MRPS23,MRPS27,MRPL39,MRPL3,MRPS35,TUFM,MRPS21,MRPL50,MRPL58,MRPS15,MRPS9,MRPS5,MRPL40,MRPL32,GFM1,MRPL11,MRPL9,MRPL16,ERAL1,CHCHD1,MRPL20,MRPL47,MRPL53,MRPS16,MRPL2,MRPS7,MRPL46
1427846	rRNA processing in the nucleus and cytosol	BioSystems: REACTOME	4.954e-15	1.269e-11	2.537e-12	2.138e-11	50	193	RPL29,FBL,RPS8,RPS23,RPS25,RPS27A,UTP15,XRN2,NOP56,NOB1,RPP30,ERI1,NOP58,NOP14,DIEXF,TSR1,PDCD11,WDR12,UTP6,WDR43,WDR3,DIMT1,RRP36,BYSL,UTP20,NOP2,RPP14,UTP4,PES1,LTV1,EXOSC8,EXOSC9,WDR36,NOL11,NOL6,BMS1,PNO1,DKC1,RIOK1,EXOSC3,HEATR1,NOL9,FCF1,UTP18,UTP11,NAT10,ISG20L2,LAS1L,RPL9,RPL12
1268843	Mitochondrial translation initiation	BioSystems: REACTOME	1.464e-14	3.749e-11	6.248e-12	5.264e-11	32	88	MRPL30,MRPL35,MRPS28,MRPL13,MRPL45,MRPL15,MTIF2,MRPS23,MRPS27,MRPL39,MRPL3,MRPS35,MRPS21,MRPL50,MRPL58,MRPS15,MRPS9,MRPS5,MRPL40,MRPL32,MRPL11,MRPL9,MRPL16,ERAL1,CHCHD1,MRPL20,MRPL47,MRPL53,MRPS16,MRPL2,MRPS7,MRPL46
1268845	Mitochondrial translation termination	BioSystems: REACTOME	1.036e-13	2.654e-10	3.791e-11	3.194e-10	31	88	MRPL30,MRPL35,MRPS28,MRPL13,MRPL45,MRPL15,MRPS23,MRPS27,MRPL39,MRPL3,MRPS35,MRPS21,MRPL50,MRPL58,MRPS15,MRPS9,MRPS5,MRPL40,MRPL32,MRPL11,MRPL9,MRPL16,ERAL1,CHCHD1,MRPL20,MRPL47,MRPL53,MRPS16,MRPL2,MRPS7,MRPL46
1383086	Major pathway of rRNA processing in the nucleolus and cytosol	BioSystems: REACTOME	1.338e-13	3.426e-10	4.283e-11	3.608e-10	46	181	RPL29,FBL,RPS8,RPS23,RPS25,RPS27A,UTP15,XRN2,NOP56,NOB1,RPP30,ERI1,NOP58,NOP14,DIEXF,TSR1,PDCD11,WDR12,UTP6,WDR43,WDR3,RRP36,BYSL,UTP20,RPP14,UTP4,PES1,LTV1,EXOSC8,EXOSC9,WDR36,NOL11,NOL6,BMS1,PNO1,RIOK1,EXOSC3,HEATR1,NOL9,FCF1,UTP18,UTP11,ISG20L2,LAS1L,RPL9,RPL12
1383087	rRNA modification in the nucleus and cytosol	BioSystems: REACTOME	1.144e-12	2.93e-09	3.255e-10	2.743e-09	25	63	FBL,UTP15,NOP56,NOP58,NOP14,DIEXF,PDCD11,UTP6,WDR43,WDR3,DIMT1,RRP36,UTP20,NOP2,UTP4,WDR36,NOL11,NOL6,BMS1,DKC1,HEATR1,FCF1,UTP18,UTP11,NAT10
1457780	Neutrophil degranulation	BioSystems: REACTOME	1.661e-11	4.253e-08	4.253e-09	3.583e-08	81	492	ACLY,ACPP,S100A8,S100A9,ATP8A1,MGST1,MMP9,ALDOA,MNDA,MPO,CCT2,ASAH1,COMMD9,CCT8,FTL,FUCA1,FUCA2,ERP44,IQGAP2,SNAP23,PGRMC1,STK10,FAF2,C3,ATP11A,GPI,RAB31,NRAS,GRN,NHLRC3,CXCL1,OLR1,GSTP1,SLCO4C1,CD14,PA2G4,GYG1,CD68,MCEMP1,HEXB,CTSC,TRAPPC1,SERPINB6,PKM,PLAUR,PLD1,METTL7A,HSP90AB1,XRCC5,CTSA,MAPK14,CTSG,CTSS,CYBB,PRTN3,IMPDH2,PSMA2,PSMB7,PSMD3,PSMD7,PSMD11,ITGAV,DDX3X,PTPRJ,DIAPH1,RAB7A,TSPAN14,R…
1269833	Assembly of the pre-replicative complex	BioSystems: REACTOME	1.727e-10	4.422e-07	4.02e-08	3.387e-07	24	71	MCM2,MCM3,MCM6,MCM7,RPS27A,PSME4,CDC6,ORC6,PSMF1,PSMA1,PSMA2,PSMA6,PSMB2,PSMB5,PSMB7,PSMC4,PSMC5,PSMD3,PSMD7,PSMD11,PSME2,E2F3,GMNN,PSME3
1270121	The citric acid (TCA) cycle and respiratory electron transport	BioSystems: REACTOME	3.321e-10	8.504e-07	7.079e-08	5.965e-07	39	171	ACO2,MDH2,TIMMDC1,SCO1,FH,SDHD,SLC16A1,ATP5F1A,ATP5PB,ATP5MC1,ATP5PF,TMEM126B,NDUFA1,NDUFA9,SUCLG2,SUCLG1,NDUFAB1,SUCLA2,NDUFB5,NDUFS1,GLO1,COX18,PDHA1,PDK1,PDK3,COX5A,UQCRFS1,COX6A1,COX7B,COX7C,ATP5MF,IDH3B,CS,DLAT,LDHA,LDHB,LRPPRC,TRAP1,NDUFAF1
1269794	Regulation of DNA replication	BioSystems: REACTOME	3.593e-10	9.203e-07	7.079e-08	5.965e-07	25	79	MCM2,MCM3,MCM6,MCM7,RPS27A,MCM10,PSME4,CDC6,ORC6,PSMF1,PSMA1,PSMA2,PSMA6,PSMB2,PSMB5,PSMB7,PSMC4,PSMC5,PSMD3,PSMD7,PSMD11,PSME2,E2F3,GMNN,PSME3
1269796	Removal of licensing factors from origins	BioSystems: REACTOME	8.493e-10	2.175e-06	1.378e-07	1.161e-06	24	76	MCM2,MCM3,MCM6,MCM7,RPS27A,MCM10,PSME4,CDC6,ORC6,PSMF1,PSMA1,PSMA2,PSMA6,PSMB2,PSMB5,PSMB7,PSMC4,PSMC5,PSMD3,PSMD7,PSMD11,PSME2,GMNN,PSME3
1269832	DNA Replication Pre-Initiation	BioSystems: REACTOME	8.609e-10	2.205e-06	1.378e-07	1.161e-06	26	88	MCM2,MCM3,MCM6,MCM7,RPS27A,MCM10,PSME4,CDC6,ORC6,PSMF1,PSMA1,PSMA2,PSMA6,PSMB2,PSMB5,PSMB7,PSMC4,PSMC5,PSMD3,PSMD7,PSMD11,PSME2,E2F3,GMNN,PSME3,RPA2
1269831	M/G1 Transition	BioSystems: REACTOME	8.609e-10	2.205e-06	1.378e-07	1.161e-06	26	88	MCM2,MCM3,MCM6,MCM7,RPS27A,MCM10,PSME4,CDC6,ORC6,PSMF1,PSMA1,PSMA2,PSMA6,PSMB2,PSMB5,PSMB7,PSMC4,PSMC5,PSMD3,PSMD7,PSMD11,PSME2,E2F3,GMNN,PSME3,RPA2
1269768	G1/S Transition	BioSystems: REACTOME	1.074e-09	2.75e-06	1.618e-07	1.363e-06	31	121	MAX,MCM2,MCM3,MCM6,MCM7,RPS27A,MCM10,CUL1,SKP2,MYC,CDC6,CDC25A,CDK4,ORC6,TYMS,PSMF1,WEE1,PSMA1,PSMA2,PSMA6,PSMB2,PSMB5,PSMB7,PSMC4,PSMC5,PSMD3,PSMD7,PSMD11,PSME2,PSME3,RPA2
177876	RNA transport	BioSystems: KEGG	1.234e-09	3.161e-06	1.756e-07	1.48e-06	38	171	SEH1L,XPO5,PRMT5,ELAC1,RPP30,THOC5,NDC1,NUP133,SMN2,EIF3A,EIF3B,EIF3C,EIF3D,EIF3G,EIF3I,PABPC4,NUP205,RNPS1,EIF2B3,EIF2B5,EIF2S2,RGPD2,RPP14,ELAC2,CLNS1A,GEMIN5,NUP93,EIF3E,KPNB1,RAN,UPF1,NMD3,GEMIN7,EIF1AX,EIF2B1,EIF2S3,EIF4EBP2,SENP2
1269777	S Phase	BioSystems: REACTOME	2.591e-09	6.636e-06	3.493e-07	2.943e-06	32	132	MAX,MCM2,MCM3,MCM6,MCM7,RPS27A,CUL1,SKP2,GINS2,MYC,PSME4,CDC6,CDC25A,CDK4,ORC6,PSMF1,WEE1,PSMA1,PSMA2,PSMA6,PSMB2,PSMB5,PSMB7,PSMC4,PSMC5,PSMD3,PSMD7,PSMD11,PSME2,RFC2,PSME3,RPA2
169351	Validated targets of C-MYC transcriptional activation	BioSystems: Pathway Interaction Database	3.597e-09	9.211e-06	4.605e-07	3.88e-06	24	81	MAX,MMP9,LIN28B,RUVBL1,MYC,BCAT1,NBN,NCL,RUVBL2,DDX18,TAF12,CDC25A,CDK4,NME1-NME2,HMGA1,SERPINI1,HSPA4,PMAIP1,IREB2,E2F3,LDHA,CDCA7,ENO1,SMAD4
1268677	Metabolism of proteins	BioSystems: REACTOME	4.124e-09	1.056e-05	5.03e-07	4.238e-06	185	1631	SEH1L,RPL29,RPN2,ACO2,RPS8,ETF1,CD109,RPS23,RPS25,RPS27A,TOMM5,RAB8A,MBTPS2,ABRAXAS1,EIF3L,CCL2,TOMM40,POMK,TIMM44,EIF3M,MPI,XRN2,NOP56,COPG1,SLC25A6,USP28,ARFGEF2,CCT7,CCT4,CCT2,ST3GAL2,APP,SKP2,AP3M1,DIS3,ARCN1,EDEM3,GRPEL1,NOP58,NDC1,DPH5,YKT6,RUVBL1,TIMM21,CCT5,ASNS,TIMM50,NUP133,CCT8,UGGT2,FUCA1,EIF3A,EIF3B,EIF3C,EIF3D,EIF3G,EIF3I,RAB21,BECN1,TRAPPC2L,ATP5F1A,ST6GALNAC1,MYC,ATP5MC1,DNAJB11,M…
1269875	DNA Replication	BioSystems: REACTOME	9.977e-09	2.555e-05	1.161e-06	9.786e-06	28	111	MCM2,MCM3,MCM6,MCM7,RPS27A,MCM10,GINS2,PSME4,CDC6,ORC6,PSMF1,PSMA1,PSMA2,PSMA6,PSMB2,PSMB5,PSMB7,PSMC4,PSMC5,PSMD3,PSMD7,PSMD11,PSME2,E2F3,RFC2,GMNN,PSME3,RPA2
1269778	Cyclin A:Cdk2-associated events at S phase entry	BioSystems: REACTOME	1.137e-08	2.911e-05	1.266e-06	1.066e-05	22	73	MAX,RPS27A,CUL1,SKP2,MYC,CDC25A,CDK4,PSMF1,WEE1,PSMA1,PSMA2,PSMA6,PSMB2,PSMB5,PSMB7,PSMC4,PSMC5,PSMD3,PSMD7,PSMD11,PSME2,PSME3
1269769	Cyclin E associated events during G1/S transition	BioSystems: REACTOME	1.503e-08	3.849e-05	1.48e-06	1.247e-05	22	74	MAX,RPS27A,CUL1,SKP2,MYC,CDC25A,CDK4,PSMF1,WEE1,PSMA1,PSMA2,PSMA6,PSMB2,PSMB5,PSMB7,PSMC4,PSMC5,PSMD3,PSMD7,PSMD11,PSME2,PSME3
1269782	Orc1 removal from chromatin	BioSystems: REACTOME	1.503e-08	3.849e-05	1.48e-06	1.247e-05	22	74	MCM2,MCM3,MCM6,MCM7,RPS27A,PSME4,CDC6,ORC6,PSMF1,PSMA1,PSMA2,PSMA6,PSMB2,PSMB5,PSMB7,PSMC4,PSMC5,PSMD3,PSMD7,PSMD11,PSME2,PSME3
1269781	Switching of origins to a post-replicative state	BioSystems: REACTOME	1.503e-08	3.849e-05	1.48e-06	1.247e-05	22	74	MCM2,MCM3,MCM6,MCM7,RPS27A,PSME4,CDC6,ORC6,PSMF1,PSMA1,PSMA2,PSMA6,PSMB2,PSMB5,PSMB7,PSMC4,PSMC5,PSMD3,PSMD7,PSMD11,PSME2,PSME3
1269837	Regulation of mitotic cell cycle	BioSystems: REACTOME	2.794e-08	7.155e-05	2.555e-06	2.153e-05	24	89	RPS27A,ANAPC5,CUL1,SKP2,CDC23,NEK2,PSME4,BTRC,ANAPC1,PSMF1,ANAPC15,PSMA1,PSMA2,PSMA6,PSMB2,PSMB5,PSMB7,PSMC4,PSMC5,PSMD3,PSMD7,PSMD11,PSME2,PSME3
1269838	APC/C-mediated degradation of cell cycle proteins	BioSystems: REACTOME	2.794e-08	7.155e-05	2.555e-06	2.153e-05	24	89	RPS27A,ANAPC5,CUL1,SKP2,CDC23,NEK2,PSME4,BTRC,ANAPC1,PSMF1,ANAPC15,PSMA1,PSMA2,PSMA6,PSMB2,PSMB5,PSMB7,PSMC4,PSMC5,PSMD3,PSMD7,PSMD11,PSME2,PSME3
1269764	Mitotic G1-G1/S phases	BioSystems: REACTOME	2.983e-08	7.64e-05	2.635e-06	2.22e-05	32	145	MAX,MCM2,MCM3,MCM6,MCM7,RPS27A,MCM10,CUL1,SKP2,MYC,CDC6,CDC25A,CDK4,ORC6,TYMS,PSMF1,WEE1,PSMA1,PSMA2,PSMA6,PSMB2,PSMB5,PSMB7,PSMC4,PSMC5,PSMD3,PSMD7,PSMD11,PSME2,E2F3,PSME3,RPA2
1270122	Pyruvate metabolism and Citric Acid (TCA) cycle	BioSystems: REACTOME	5.163e-08	0.0001322	4.408e-06	3.714e-05	17	49	ACO2,MDH2,FH,SDHD,SLC16A1,SUCLG2,SUCLG1,SUCLA2,GLO1,PDHA1,PDK1,PDK3,IDH3B,CS,DLAT,LDHA,LDHB
199378	Ribosome biogenesis in eukaryotes	BioSystems: KEGG	6.209e-08	0.000159	5.13e-06	4.322e-05	26	106	FBL,UTP15,XRN2,NOP56,NOB1,RPP30,NOP58,UTP6,WDR43,WDR3,UTP4,GTPBP4,GNL2,WDR36,NOL6,BMS1,DKC1,GNL3,RAN,RIOK1,HEATR1,RBM28,NMD3,FCF1,UTP18,NAT10
1269751	p53-Independent DNA Damage Response	BioSystems: REACTOME	8.089e-08	0.0002072	5.974e-06	5.034e-05	18	56	RPS27A,PSME4,CHEK2,CDC25A,PSMF1,PSMA1,PSMA2,PSMA6,PSMB2,PSMB5,PSMB7,PSMC4,PSMC5,PSMD3,PSMD7,PSMD11,PSME2,PSME3
1269752	Ubiquitin Mediated Degradation of Phosphorylated Cdc25A	BioSystems: REACTOME	8.089e-08	0.0002072	5.974e-06	5.034e-05	18	56	RPS27A,PSME4,CHEK2,CDC25A,PSMF1,PSMA1,PSMA2,PSMA6,PSMB2,PSMB5,PSMB7,PSMC4,PSMC5,PSMD3,PSMD7,PSMD11,PSME2,PSME3
1269750	p53-Independent G1/S DNA damage checkpoint	BioSystems: REACTOME	8.089e-08	0.0002072	5.974e-06	5.034e-05	18	56	RPS27A,PSME4,CHEK2,CDC25A,PSMF1,PSMA1,PSMA2,PSMA6,PSMB2,PSMB5,PSMB7,PSMC4,PSMC5,PSMD3,PSMD7,PSMD11,PSME2,PSME3
1269836	CDT1 association with the CDC6:ORC:origin complex	BioSystems: REACTOME	8.398e-08	0.0002151	5.974e-06	5.034e-05	19	62	RPS27A,PSME4,CDC6,ORC6,PSMF1,PSMA1,PSMA2,PSMA6,PSMB2,PSMB5,PSMB7,PSMC4,PSMC5,PSMD3,PSMD7,PSMD11,PSME2,GMNN,PSME3
1269331	NIK-->noncanonical NF-kB signaling	BioSystems: REACTOME	8.398e-08	0.0002151	5.974e-06	5.034e-05	19	62	RPS27A,CUL1,PSME4,BTRC,CHUK,PSMF1,PSMA1,PSMA2,PSMA6,PSMB2,PSMB5,PSMB7,PSMC4,PSMC5,PSMD3,PSMD7,PSMD11,PSME2,PSME3
1269851	APC/C:Cdh1 mediated degradation of Cdc20 and other APC/C:Cdh1 targeted proteins in late mitosis/early G1	BioSystems: REACTOME	1.012e-07	0.0002591	7.002e-06	5.899e-05	21	75	RPS27A,ANAPC5,SKP2,CDC23,PSME4,ANAPC1,PSMF1,ANAPC15,PSMA1,PSMA2,PSMA6,PSMB2,PSMB5,PSMB7,PSMC4,PSMC5,PSMD3,PSMD7,PSMD11,PSME2,PSME3
1269306	Dectin-1 mediated noncanonical NF-kB signaling	BioSystems: REACTOME	1.118e-07	0.0002863	7.157e-06	6.03e-05	19	63	RPS27A,CUL1,PSME4,BTRC,CHUK,PSMF1,PSMA1,PSMA2,PSMA6,PSMB2,PSMB5,PSMB7,PSMC4,PSMC5,PSMD3,PSMD7,PSMD11,PSME2,PSME3
1269638	Degradation of GLI2 by the proteasome	BioSystems: REACTOME	1.118e-07	0.0002863	7.157e-06	6.03e-05	19	63	RPS27A,CUL1,PSME4,BTRC,GSK3B,PSMF1,PSMA1,PSMA2,PSMA6,PSMB2,PSMB5,PSMB7,PSMC4,PSMC5,PSMD3,PSMD7,PSMD11,PSME2,PSME3
1269637	GLI3 is processed to GLI3R by the proteasome	BioSystems: REACTOME	1.118e-07	0.0002863	7.157e-06	6.03e-05	19	63	RPS27A,CUL1,PSME4,BTRC,GSK3B,PSMF1,PSMA1,PSMA2,PSMA6,PSMB2,PSMB5,PSMB7,PSMC4,PSMC5,PSMD3,PSMD7,PSMD11,PSME2,PSME3
1269845	APC:Cdc20 mediated degradation of cell cycle proteins prior to satisfation of the cell cycle checkpoint	BioSystems: REACTOME	1.299e-07	0.0003327	8.074e-06	6.803e-05	21	76	RPS27A,ANAPC5,CDC23,NEK2,PSME4,ANAPC1,PSMF1,ANAPC15,PSMA1,PSMA2,PSMA6,PSMB2,PSMB5,PSMB7,PSMC4,PSMC5,PSMD3,PSMD7,PSMD11,PSME2,PSME3
1269195	Antigen processing-Cross presentation	BioSystems: REACTOME	1.385e-07	0.0003547	8.074e-06	6.803e-05	25	103	RPS27A,FCGR1A,SNAP23,NCF2,PSME4,CD14,CHUK,PSMF1,CTSL,CTSS,CYBB,PSMA1,PSMA2,PSMA6,PSMB2,PSMB5,PSMB7,PSMC4,PSMC5,PSMD3,PSMD7,PSMD11,PSME2,ITGAV,PSME3
1269779	Synthesis of DNA	BioSystems: REACTOME	1.385e-07	0.0003547	8.074e-06	6.803e-05	25	103	MCM2,MCM3,MCM6,MCM7,RPS27A,GINS2,PSME4,CDC6,ORC6,PSMF1,PSMA1,PSMA2,PSMA6,PSMB2,PSMB5,PSMB7,PSMC4,PSMC5,PSMD3,PSMD7,PSMD11,PSME2,RFC2,PSME3,RPA2
1269849	APC/C:Cdc20 mediated degradation of Securin	BioSystems: REACTOME	1.41e-07	0.0003611	8.074e-06	6.803e-05	20	70	RPS27A,ANAPC5,CDC23,PSME4,ANAPC1,PSMF1,ANAPC15,PSMA1,PSMA2,PSMA6,PSMB2,PSMB5,PSMB7,PSMC4,PSMC5,PSMD3,PSMD7,PSMD11,PSME2,PSME3
1269839	Regulation of APC/C activators between G1/S and early anaphase	BioSystems: REACTOME	1.472e-07	0.000377	8.074e-06	6.803e-05	22	83	RPS27A,ANAPC5,CUL1,CDC23,PSME4,BTRC,ANAPC1,PSMF1,ANAPC15,PSMA1,PSMA2,PSMA6,PSMB2,PSMB5,PSMB7,PSMC4,PSMC5,PSMD3,PSMD7,PSMD11,PSME2,PSME3
1269639	Degradation of GLI1 by the proteasome	BioSystems: REACTOME	1.478e-07	0.0003785	8.074e-06	6.803e-05	19	64	RPS27A,CUL1,PSME4,BTRC,PSMF1,PSMA1,PSMA2,PSMA6,PSMB2,PSMB5,PSMB7,PSMC4,PSMC5,PSMD3,PSMD7,PSMD11,PSME2,ITCH,PSME3
1269841	SCF-beta-TrCP mediated degradation of Emi1	BioSystems: REACTOME	1.482e-07	0.0003795	8.074e-06	6.803e-05	18	58	RPS27A,CUL1,PSME4,BTRC,PSMF1,PSMA1,PSMA2,PSMA6,PSMB2,PSMB5,PSMB7,PSMC4,PSMC5,PSMD3,PSMD7,PSMD11,PSME2,PSME3
835393	superpathway of conversion of glucose to acetyl CoA and entry into the TCA cycle	BioSystems: BIOCYC	1.513e-07	0.0003876	8.075e-06	6.803e-05	14	36	ACO2,MDH2,FH,ALDOA,SDHD,SUCLG2,SUCLG1,SUCLA2,PDHA1,PGK1,PKLR,PKM,CS,DLAT
1269844	APC/C:Cdc20 mediated degradation of mitotic proteins	BioSystems: REACTOME	2.111e-07	0.0005407	1.104e-05	9.298e-05	21	78	RPS27A,ANAPC5,CDC23,NEK2,PSME4,ANAPC1,PSMF1,ANAPC15,PSMA1,PSMA2,PSMA6,PSMB2,PSMB5,PSMB7,PSMC4,PSMC5,PSMD3,PSMD7,PSMD11,PSME2,PSME3
1269852	Autodegradation of Cdh1 by Cdh1:APC/C	BioSystems: REACTOME	2.534e-07	0.000649	1.259e-05	0.000106	19	66	RPS27A,ANAPC5,CDC23,ANAPC1,PSMF1,ANAPC15,PSMA1,PSMA2,PSMA6,PSMB2,PSMB5,PSMB7,PSMC4,PSMC5,PSMD3,PSMD7,PSMD11,PSME2,PSME3
1269783	CDK-mediated phosphorylation and removal of Cdc6	BioSystems: REACTOME	2.605e-07	0.000667	1.259e-05	0.000106	17	54	RPS27A,PSME4,CDC6,PSMF1,PSMA1,PSMA2,PSMA6,PSMB2,PSMB5,PSMB7,PSMC4,PSMC5,PSMD3,PSMD7,PSMD11,PSME2,PSME3
1269791	Ubiquitin-dependent degradation of Cyclin D	BioSystems: REACTOME	2.605e-07	0.000667	1.259e-05	0.000106	17	54	RPS27A,PSME4,CDK4,PSMF1,PSMA1,PSMA2,PSMA6,PSMB2,PSMB5,PSMB7,PSMC4,PSMC5,PSMD3,PSMD7,PSMD11,PSME2,PSME3
1269792	Ubiquitin-dependent degradation of Cyclin D1	BioSystems: REACTOME	2.605e-07	0.000667	1.259e-05	0.000106	17	54	RPS27A,PSME4,CDK4,PSMF1,PSMA1,PSMA2,PSMA6,PSMB2,PSMB5,PSMB7,PSMC4,PSMC5,PSMD3,PSMD7,PSMD11,PSME2,PSME3
1269842	Activation of APC/C and APC/C:Cdc20 mediated degradation of mitotic proteins	BioSystems: REACTOME	2.673e-07	0.0006845	1.268e-05	0.0001068	21	79	RPS27A,ANAPC5,CDC23,NEK2,PSME4,ANAPC1,PSMF1,ANAPC15,PSMA1,PSMA2,PSMA6,PSMB2,PSMB5,PSMB7,PSMC4,PSMC5,PSMD3,PSMD7,PSMD11,PSME2,PSME3
1269725	Regulation of mRNA stability by proteins that bind AU-rich elements	BioSystems: REACTOME	3.035e-07	0.0007772	1.413e-05	0.0001191	23	93	RPS27A,DIS3,PSME4,EXOSC8,EXOSC9,PSMF1,MAPK14,PRKCA,PSMA1,PSMA2,PSMA6,PSMB2,PSMB5,PSMB7,PSMC4,PSMC5,PSMD3,PSMD7,PSMD11,PSME2,TNPO1,EXOSC3,PSME3
1269107	Vpu mediated degradation of CD4	BioSystems: REACTOME	3.506e-07	0.0008978	1.603e-05	0.0001351	17	55	RPS27A,PSME4,BTRC,PSMF1,PSMA1,PSMA2,PSMA6,PSMB2,PSMB5,PSMB7,PSMC4,PSMC5,PSMD3,PSMD7,PSMD11,PSME2,PSME3
1268745	Mitochondrial protein import	BioSystems: REACTOME	4.551e-07	0.001165	2.045e-05	0.0001723	18	62	ACO2,TOMM5,TOMM40,TIMM44,SLC25A6,GRPEL1,TIMM21,TIMM50,ATP5F1A,ATP5MC1,PMPCA,VDAC1,PMPCB,CS,TOMM70,COA6,TIMM10,TIMM9
1270295	Regulation of Apoptosis	BioSystems: REACTOME	4.681e-07	0.001199	2.067e-05	0.0001742	17	56	RPS27A,PSME4,OPA1,PSMF1,PSMA1,PSMA2,PSMA6,PSMB2,PSMB5,PSMB7,PSMC4,PSMC5,PSMD3,PSMD7,PSMD11,PSME2,PSME3
1269846	Cdc20:Phospho-APC/C mediated degradation of Cyclin A	BioSystems: REACTOME	4.854e-07	0.001243	2.107e-05	0.0001775	20	75	RPS27A,ANAPC5,CDC23,PSME4,ANAPC1,PSMF1,ANAPC15,PSMA1,PSMA2,PSMA6,PSMB2,PSMB5,PSMB7,PSMC4,PSMC5,PSMD3,PSMD7,PSMD11,PSME2,PSME3
1269742	Cell Cycle Checkpoints	BioSystems: REACTOME	5.462e-07	0.001399	2.331e-05	0.0001964	37	204	MCM2,MCM3,MCM6,MCM7,RPS27A,MCM10,ABRAXAS1,ANAPC5,CDC23,ATR,NBN,PSME4,HERC2,CHEK2,CDC6,CDC25A,ORC6,ANAPC1,PSMF1,WEE1,ANAPC15,BRCC3,PSMA1,PSMA2,PSMA6,PSMB2,PSMB5,PSMB7,PSMC4,PSMC5,PSMD3,PSMD7,PSMD11,PSME2,RFC2,PSME3,RPA2
83040	Proteasome	BioSystems: KEGG	5.741e-07	0.00147	2.41e-05	0.0002031	15	45	PSME4,PSMF1,PSMA1,PSMA2,PSMA6,PSMB2,PSMB5,PSMB7,PSMC4,PSMC5,PSMD3,PSMD7,PSMD11,PSME2,PSME3
1269770	SCF(Skp2)-mediated degradation of p27/p21	BioSystems: REACTOME	5.924e-07	0.001517	2.432e-05	0.0002049	18	63	RPS27A,CUL1,SKP2,CDK4,PSMF1,PSMA1,PSMA2,PSMA6,PSMB2,PSMB5,PSMB7,PSMC4,PSMC5,PSMD3,PSMD7,PSMD11,PSME2,PSME3
1269753	G2/M Checkpoints	BioSystems: REACTOME	5.982e-07	0.001532	2.432e-05	0.0002049	33	172	MCM2,MCM3,MCM6,MCM7,RPS27A,MCM10,ABRAXAS1,ATR,NBN,PSME4,HERC2,CHEK2,CDC6,CDC25A,ORC6,PSMF1,WEE1,BRCC3,PSMA1,PSMA2,PSMA6,PSMB2,PSMB5,PSMB7,PSMC4,PSMC5,PSMD3,PSMD7,PSMD11,PSME2,RFC2,PSME3,RPA2
1269186	Activation of NF-kappaB in B cells	BioSystems: REACTOME	6.946e-07	0.001779	2.78e-05	0.0002342	19	70	RPS27A,CUL1,PSME4,BTRC,CHUK,PSMF1,PSMA1,PSMA2,PSMA6,PSMB2,PSMB5,PSMB7,PSMC4,PSMC5,PSMD3,PSMD7,PSMD11,PSME2,PSME3
1269057	HIV Infection	BioSystems: REACTOME	7.056e-07	0.001807	2.78e-05	0.0002342	41	240	SEH1L,RPS27A,SLC25A5,SLC25A6,NELFCD,ATP6V1H,NDC1,NUP133,RNMT,SSRP1,NUP205,PSME4,SUPT4H1,TAF5,TAF12,NMT1,TAF13,BTRC,GTF2H1,SUPT16H,HMGA1,PSMF1,POLR2D,XRCC5,NUP93,PSMA1,PSMA2,PSMA6,PSMB2,PSMB5,PSMB7,PSMC4,PSMC5,PSMD3,PSMD7,PSMD11,PSME2,KPNB1,RAN,CHMP4B,PSME3
1457807	FBXL7 down-regulates AURKA during mitotic entry and in early mitosis	BioSystems: REACTOME	8.162e-07	0.00209	3.117e-05	0.0002627	17	58	RPS27A,CUL1,PSME4,PSMF1,PSMA1,PSMA2,PSMA6,PSMB2,PSMB5,PSMB7,PSMC4,PSMC5,PSMD3,PSMD7,PSMD11,PSME2,PSME3
1269746	Stabilization of p53	BioSystems: REACTOME	8.162e-07	0.00209	3.117e-05	0.0002627	17	58	RPS27A,PSME4,CHEK2,PSMF1,PSMA1,PSMA2,PSMA6,PSMB2,PSMB5,PSMB7,PSMC4,PSMC5,PSMD3,PSMD7,PSMD11,PSME2,PSME3
82927	Citrate cycle (TCA cycle)	BioSystems: KEGG	8.278e-07	0.00212	3.117e-05	0.0002627	12	30	ACLY,ACO2,MDH2,FH,SDHD,SUCLG2,SUCLG1,SUCLA2,PDHA1,IDH3B,CS,DLAT
1269091	Host Interactions of HIV factors	BioSystems: REACTOME	9.767e-07	0.002501	3.625e-05	0.0003054	28	136	SEH1L,RPS27A,SLC25A5,SLC25A6,ATP6V1H,NDC1,NUP133,NUP205,PSME4,BTRC,HMGA1,PSMF1,NUP93,PSMA1,PSMA2,PSMA6,PSMB2,PSMB5,PSMB7,PSMC4,PSMC5,PSMD3,PSMD7,PSMD11,PSME2,KPNB1,RAN,PSME3
1270296	Regulation of activated PAK-2p34 by proteasome mediated degradation	BioSystems: REACTOME	1.106e-06	0.002832	3.988e-05	0.000336	16	53	RPS27A,PSME4,PSMF1,PSMA1,PSMA2,PSMA6,PSMB2,PSMB5,PSMB7,PSMC4,PSMC5,PSMD3,PSMD7,PSMD11,PSME2,PSME3
1269199	Cross-presentation of soluble exogenous antigens (endosomes)	BioSystems: REACTOME	1.106e-06	0.002832	3.988e-05	0.000336	16	53	FCGR1A,PSME4,PSMF1,PSMA1,PSMA2,PSMA6,PSMB2,PSMB5,PSMB7,PSMC4,PSMC5,PSMD3,PSMD7,PSMD11,PSME2,PSME3
1268698	Folding of actin by CCT/TriC	BioSystems: REACTOME	1.401e-06	0.003588	4.983e-05	0.0004198	7	10	CCT7,CCT4,CCT2,CCT5,CCT8,TCP1,CCT3
1269056	Infectious disease	BioSystems: REACTOME	1.486e-06	0.003805	5.212e-05	0.0004391	57	393	SEH1L,RPL29,RPS8,RPS23,RPS25,RPS27A,SLC25A5,SLC25A6,NELFCD,ATP6V1H,NDC1,NUP133,RNMT,SSRP1,NUP205,PSME4,SUPT4H1,TAF5,TAF12,NMT1,TAF13,BTRC,CANX,GRB2,CBL,GRSF1,GTF2H1,SUPT16H,HMGA1,TXNRD1,CLTA,HSP90AB1,PSMF1,POLR2D,XRCC5,NUP93,PSMA1,PSMA2,PSMA6,PSMB2,PSMB5,PSMB7,PSMC4,PSMC5,PSMD3,PSMD7,PSMD11,PSME2,KPNB1,KPNA4,IPO5,RAN,CHMP4B,EEF2,PSME3,RPL9,RPL12
1269688	Processing of Capped Intron-Containing Pre-mRNA	BioSystems: REACTOME	1.695e-06	0.00434	5.866e-05	0.0004942	41	248	SEH1L,SF3B4,SMNDC1,BCAS2,THOC5,RBM22,SNRNP48,NDC1,PPIL1,NUP133,FUS,USP39,SNRPA,SNRPC,SNRPD1,CPSF3,SNRPF,SNRPN,WBP11,HNRNPM,NUP205,RNPS1,SF3A3,HNRNPA0,PRPF19,CPSF2,SF3B3,PRPF4,WBP4,U2AF2,HNRNPF,EFTUD2,POLR2D,SF1,PRCC,NUP93,PRPF31,PTBP1,SLBP,DDX39A,HNRNPR
1269192	Class I MHC mediated antigen processing & presentation	BioSystems: REACTOME	1.74e-06	0.004456	5.942e-05	0.0005006	55	376	UBA5,RPS27A,KCTD6,FCGR1A,ANAPC5,CUL2,CUL1,UBE2J1,SKP2,CDC23,SEC24A,KBTBD8,SNAP23,NCF2,BLMH,PSME4,HERC2,BTRC,CANX,CBLB,CCNF,CD14,TRIP12,CHUK,UBA1,UBE3A,ANAPC1,ANAPC13,PSMF1,RCHY1,DZIP3,CTSL,CTSS,CYBB,DCAF1,PSMA1,PSMA2,PSMA6,PSMB2,PSMB5,PSMB7,FBXL12,PSMC4,PSMC5,PSMD3,PSMD7,PSMD11,PSME2,KEAP1,ITGAV,ITCH,RBBP6,RNF6,UBE3D,PSME3
1268682	Formation of the ternary complex, and subsequently, the 43S complex	BioSystems: REACTOME	1.917e-06	0.00491	6.377e-05	0.0005373	16	55	RPS8,RPS23,RPS25,RPS27A,EIF3L,EIF3M,EIF3A,EIF3B,EIF3C,EIF3D,EIF3G,EIF3I,EIF2S2,EIF3E,EIF1AX,EIF2S3
1269747	Autodegradation of the E3 ubiquitin ligase COP1	BioSystems: REACTOME	1.917e-06	0.00491	6.377e-05	0.0005373	16	55	RPS27A,PSME4,PSMF1,PSMA1,PSMA2,PSMA6,PSMB2,PSMB5,PSMB7,PSMC4,PSMC5,PSMD3,PSMD7,PSMD11,PSME2,PSME3
SMP00057	Citric Acid Cycle	SMPDB	2.111e-06	0.005405	6.93e-05	0.0005839	9	18	ACO2,MDH2,FH,SDHD,SUCLG1,PDHA1,IDH3B,CS,DLAT
1268838	Organelle biogenesis and maintenance	BioSystems: REACTOME	2.15e-06	0.005506	6.969e-05	0.0005872	51	341	MKKS,MRPL30,CEP76,MRPL35,RAB8A,ARL13B,MRPS28,MRPL13,CCT4,CCT2,MRPL45,MRPL15,HAUS1,CCT5,MTIF2,MRPS23,CCT8,NCOA1,GABPA,MRPS27,NEK2,TCP1,TFAM,MRPL39,MRPL3,CCT3,MRPS35,TUFM,MRPS21,MRPL50,MRPL58,MAPK14,MRPS15,MRPS9,MRPS5,MRPL40,MRPL32,GFM1,MRPL11,MRPL9,MRPL16,ERAL1,CHCHD1,TNPO1,MRPL20,MRPL47,MRPL53,MRPS16,MRPL2,MRPS7,MRPL46
1269743	G1/S DNA Damage Checkpoints	BioSystems: REACTOME	2.549e-06	0.006528	8.16e-05	0.0006876	18	69	RPS27A,PSME4,CHEK2,CDC25A,PSMF1,PSMA1,PSMA2,PSMA6,PSMB2,PSMB5,PSMB7,PSMC4,PSMC5,PSMD3,PSMD7,PSMD11,PSME2,PSME3
1383017	The role of GTSE1 in G2/M progression after G2 checkpoint	BioSystems: REACTOME	2.912e-06	0.007458	9.095e-05	0.0007663	17	63	RPS27A,PSME4,HSP90AB1,PSMF1,PSMA1,PSMA2,PSMA6,PSMB2,PSMB5,PSMB7,PSMC4,PSMC5,PSMD3,PSMD7,PSMD11,PSME2,PSME3
1268685	Ribosomal scanning and start codon recognition	BioSystems: REACTOME	2.912e-06	0.007458	9.095e-05	0.0007663	17	63	RPS8,RPS23,RPS25,RPS27A,EIF3L,EIF3M,EIF3A,EIF3B,EIF3C,EIF3D,EIF3G,EIF3I,EIF2S2,EIF4H,EIF3E,EIF1AX,EIF2S3
M194	Proteasome Complex	MSigDB C2 BIOCARTA (v6.0)	2.961e-06	0.007582	9.136e-05	0.0007697	11	28	RPN2,UBA1,UBE3A,PSMA1,PSMA2,PSMA6,PSMB2,PSMB5,PSMB7,PSMC4,PSMD11
1269098	Vif-mediated degradation of APOBEC3G	BioSystems: REACTOME	3.229e-06	0.00827	9.846e-05	0.0008296	16	57	RPS27A,PSME4,PSMF1,PSMA1,PSMA2,PSMA6,PSMB2,PSMB5,PSMB7,PSMC4,PSMC5,PSMD3,PSMD7,PSMD11,PSME2,PSME3
1269709	tRNA Aminoacylation	BioSystems: REACTOME	3.482e-06	0.008918	0.0001049	0.0008839	14	45	MARS,WARS2,FARSA,LARS,TARS2,YARS,IARS2,NARS,MARS2,VARS,PPA1,DARS,KARS,DARS2
1268684	Translation initiation complex formation	BioSystems: REACTOME	3.688e-06	0.009446	0.0001086	0.0009148	17	64	RPS8,RPS23,RPS25,RPS27A,EIF3L,EIF3M,EIF3A,EIF3B,EIF3C,EIF3D,EIF3G,EIF3I,EIF2S2,EIF4H,EIF3E,EIF1AX,EIF2S3
1268934	Defective CFTR causes cystic fibrosis	BioSystems: REACTOME	3.688e-06	0.009446	0.0001086	0.0009148	17	64	RPS27A,PSME4,PSMF1,DERL1,PSMA1,PSMA2,PSMA6,PSMB2,PSMB5,PSMB7,PSMC4,PSMC5,PSMD3,PSMD7,PSMD11,PSME2,PSME3
1270125	Citric acid cycle (TCA cycle)	BioSystems: REACTOME	3.74e-06	0.009578	0.0001088	0.0009171	9	19	ACO2,MDH2,FH,SDHD,SUCLG2,SUCLG1,SUCLA2,IDH3B,CS
814926	Carbon metabolism	BioSystems: KEGG	3.812e-06	0.009762	0.0001097	0.0009242	24	114	ACADM,ACO2,MDH2,ME2,FH,ALDOA,SDHD,SUCLG2,SUCLG1,SUCLA2,GOT1,GOT2,GPI,TKT,PDHA1,PGK1,PKLR,PKM,PSAT1,IDH3B,CS,PHGDH,DLAT,ENO1
1269606	Degradation of AXIN	BioSystems: REACTOME	4.149e-06	0.01062	0.0001181	0.0009947	16	58	RPS27A,PSME4,PSMF1,PSMA1,PSMA2,PSMA6,PSMB2,PSMB5,PSMB7,PSMC4,PSMC5,PSMD3,PSMD7,PSMD11,PSME2,PSME3
1268696	Prefoldin mediated transfer of substrate to CCT/TriC	BioSystems: REACTOME	4.444e-06	0.01138	0.0001251	0.001054	11	29	CCT7,CCT4,CCT2,CCT5,CCT8,TUBB6,TCP1,CCT3,PFDN1,PFDN2,TUBB1
1268699	Association of TriC/CCT with target proteins during biosynthesis	BioSystems: REACTOME	4.505e-06	0.01154	0.0001254	0.001057	13	40	XRN2,NOP56,ARFGEF2,CCT7,CCT4,CCT2,AP3M1,CCT5,CCT8,STAT3,TCP1,CCT3,DCAF7
1268683	Activation of the mRNA upon binding of the cap-binding complex and eIFs, and subsequent binding to 43S	BioSystems: REACTOME	4.646e-06	0.0119	0.0001279	0.001078	17	65	RPS8,RPS23,RPS25,RPS27A,EIF3L,EIF3M,EIF3A,EIF3B,EIF3C,EIF3D,EIF3G,EIF3I,EIF2S2,EIF4H,EIF3E,EIF1AX,EIF2S3
1269726	AUF1 (hnRNP D0) binds and destabilizes mRNA	BioSystems: REACTOME	5.296e-06	0.01356	0.0001443	0.001216	16	59	RPS27A,PSME4,PSMF1,PSMA1,PSMA2,PSMA6,PSMB2,PSMB5,PSMB7,PSMC4,PSMC5,PSMD3,PSMD7,PSMD11,PSME2,PSME3
1269301	FCERI mediated NF-kB activation	BioSystems: REACTOME	5.982e-06	0.01532	0.0001606	0.001354	20	87	RPS27A,CUL1,PSME4,BTRC,CHUK,PSMF1,PSMA1,PSMA2,PSMA6,PSMB2,PSMB5,PSMB7,PSMC4,PSMC5,PSMD3,PSMD7,PSMD11,PSME2,PSME3,LYN
1268678	Translation	BioSystems: REACTOME	6.05e-06	0.01549	0.0001606	0.001354	30	165	RPL29,RPN2,RPS8,ETF1,RPS23,RPS25,RPS27A,EIF3L,EIF3M,EIF3A,EIF3B,EIF3C,EIF3D,EIF3G,EIF3I,SRP19,SRP68,SRP72,EIF2B3,EIF2B5,EIF2S2,SEC11A,EIF4H,EIF3E,EEF2,EIF1AX,EIF2B1,EIF2S3,RPL9,RPL12
1269290	Regulation of RAS by GAPs	BioSystems: REACTOME	6.084e-06	0.01558	0.0001606	0.001354	18	73	RPS27A,PSME4,NRAS,PSMF1,PSMA1,PSMA2,PSMA6,PSMB2,PSMB5,PSMB7,PSMC4,PSMC5,PSMD3,PSMD7,PSMD11,PSME2,KRAS,PSME3
PW:0000026	citrate cycle	Pathway Ontology	6.342e-06	0.01624	0.0001657	0.001396	9	20	ACO2,MDH2,FH,SDHD,SUCLG2,SUCLG1,SUCLA2,IDH3B,CS
1268928	Hh mutants that don't undergo autocatalytic processing are degraded by ERAD	BioSystems: REACTOME	6.718e-06	0.01721	0.0001738	0.001464	16	60	RPS27A,PSME4,PSMF1,PSMA1,PSMA2,PSMA6,PSMB2,PSMB5,PSMB7,PSMC4,PSMC5,PSMD3,PSMD7,PSMD11,PSME2,PSME3
1269745	p53-Dependent G1 DNA Damage Response	BioSystems: REACTOME	7.254e-06	0.01858	0.0001839	0.00155	17	67	RPS27A,PSME4,CHEK2,PSMF1,PSMA1,PSMA2,PSMA6,PSMB2,PSMB5,PSMB7,PSMC4,PSMC5,PSMD3,PSMD7,PSMD11,PSME2,PSME3
1269744	p53-Dependent G1/S DNA damage checkpoint	BioSystems: REACTOME	7.254e-06	0.01858	0.0001839	0.00155	17	67	RPS27A,PSME4,CHEK2,PSMF1,PSMA1,PSMA2,PSMA6,PSMB2,PSMB5,PSMB7,PSMC4,PSMC5,PSMD3,PSMD7,PSMD11,PSME2,PSME3
1269304	CLEC7A (Dectin-1) signaling	BioSystems: REACTOME	7.484e-06	0.01917	0.0001872	0.001578	22	103	RPS27A,CUL1,AHCYL1,PSME4,BTRC,CLEC7A,CHUK,PSMF1,PPP3CA,PSMA1,PSMA2,PSMA6,PSMB2,PSMB5,PSMB7,PSMC4,PSMC5,PSMD3,PSMD7,PSMD11,PSME2,PSME3
1270174	Regulation of ornithine decarboxylase (ODC)	BioSystems: REACTOME	7.53e-06	0.01928	0.0001872	0.001578	15	54	PSME4,PSMF1,PSMA1,PSMA2,PSMA6,PSMB2,PSMB5,PSMB7,PSMC4,PSMC5,PSMD3,PSMD7,PSMD11,PSME2,PSME3
782397	TCA cycle	BioSystems: BIOCYC	8.002e-06	0.02049	0.0001962	0.001653	8	16	ACO2,MDH2,FH,SDHD,SUCLG2,SUCLG1,SUCLA2,CS
1270414	Cellular responses to stress	BioSystems: REACTOME	8.045e-06	0.0206	0.0001962	0.001653	61	454	SEH1L,RPS27A,PIK3R4,CITED2,ANAPC5,CUL2,HSPA4L,MAPKAPK5,NDC1,NUP133,BECN1,CDC23,ATR,NBN,NCF2,STAT3,NUP205,PSME4,TERF2,GSK3B,GSR,GSTP1,PRDX1,WDR45B,CDK4,HMGA1,DNAJC7,TXN,TXNRD1,ANAPC1,PRDX5,TXN2,HSPA4,ASF1A,HSP90AB1,PSMF1,ANAPC15,BAG4,BAG3,MAPK14,NUP93,CXCL8,CYBB,PSMA1,PSMA2,PSMA6,PSMB2,PSMB5,PSMB7,PSMC4,PSMC5,PSMD3,PSMD7,PSMD11,PSME2,MAPKAPK3,E2F3,CHMP4B,LMNB1,PSME3,RPA2
1269605	Degradation of DVL	BioSystems: REACTOME	8.473e-06	0.0217	0.000203	0.001711	16	61	RPS27A,PSME4,PSMF1,PSMA1,PSMA2,PSMA6,PSMB2,PSMB5,PSMB7,PSMC4,PSMC5,PSMD3,PSMD7,PSMD11,PSME2,PSME3
1270158	Metabolism of amino acids and derivatives	BioSystems: REACTOME	8.483e-06	0.02173	0.000203	0.001711	52	367	RPL29,MARS,RPS8,RPS23,RPS25,RPS27A,FAH,AHCY,LARS,ASNS,MTR,SRM,BCAT1,BCKDHB,NDUFAB1,PSME4,GLS,GOT1,GOT2,LIAS,OAT,CBS,GSR,KYAT3,CARNMT1,PDHA1,SQOR,ENOPH1,TXNRD1,PYCR2,PSAT1,PSMF1,CTH,PSMA1,PSMA2,PSMA6,PSMB2,PSMB5,PSMB7,PSMC4,PSMC5,PSMD3,DARS,PSMD7,PSMD11,PSME2,PHGDH,KARS,DLAT,PSME3,RPL9,RPL12
1269636	Hedgehog 'off' state	BioSystems: REACTOME	8.823e-06	0.0226	0.0002092	0.001763	22	104	RPS27A,ADCY7,CUL1,PSME4,BTRC,GSK3B,PSMF1,PRKAR2A,PSMA1,PSMA2,PSMA6,PSMB2,PSMB5,PSMB7,PSMC4,PSMC5,PSMD3,PSMD7,PSMD11,PSME2,ITCH,PSME3
790012	Biosynthesis of amino acids	BioSystems: KEGG	9.15e-06	0.02343	0.000215	0.001811	18	75	ACO2,ALDOA,MTR,BCAT1,GOT1,GOT2,CBS,TKT,PGK1,PKLR,PKM,PYCR2,PSAT1,IDH3B,CS,CTH,PHGDH,ENO1
1268927	Hh mutants abrogate ligand secretion	BioSystems: REACTOME	1.062e-05	0.02721	0.0002474	0.002084	16	62	RPS27A,PSME4,PSMF1,PSMA1,PSMA2,PSMA6,PSMB2,PSMB5,PSMB7,PSMC4,PSMC5,PSMD3,PSMD7,PSMD11,PSME2,PSME3
1270418	Oxygen-dependent proline hydroxylation of Hypoxia-inducible Factor Alpha	BioSystems: REACTOME	1.11e-05	0.02844	0.0002537	0.002138	17	69	RPS27A,CUL2,PSME4,PSMF1,PSMA1,PSMA2,PSMA6,PSMB2,PSMB5,PSMB7,PSMC4,PSMC5,PSMD3,PSMD7,PSMD11,PSME2,PSME3
1269612	Asymmetric localization of PCP proteins	BioSystems: REACTOME	1.11e-05	0.02844	0.0002537	0.002138	17	69	RPS27A,PSME4,PSMF1,PSMA1,PSMA2,PSMA6,PSMB2,PSMB5,PSMB7,PSMC4,PSMC5,PSMD3,PSMD7,PSMD11,PSME2,FZD3,PSME3
1269826	Separation of Sister Chromatids	BioSystems: REACTOME	1.119e-05	0.02867	0.0002537	0.002138	30	170	SEH1L,SKA2,RPS27A,ANAPC5,NUP133,NUDC,CDC23,RCC2,PSME4,ANAPC1,PSMF1,ANAPC15,AHCTF1,PPP1CC,CENPH,PSMA1,PSMA2,PSMA6,PSMB2,PSMB5,PSMB7,PSMC4,PSMC5,PSMD3,PSMD7,PSMD11,PSME2,SPDL1,CDCA8,PSME3
1269689	mRNA Splicing	BioSystems: REACTOME	1.162e-05	0.02975	0.000261	0.002199	33	196	SF3B4,SMNDC1,BCAS2,RBM22,SNRNP48,PPIL1,FUS,USP39,SNRPA,SNRPC,SNRPD1,CPSF3,SNRPF,SNRPN,WBP11,HNRNPM,RNPS1,SF3A3,HNRNPA0,PRPF19,CPSF2,SF3B3,PRPF4,WBP4,U2AF2,HNRNPF,EFTUD2,POLR2D,SF1,PRCC,PRPF31,PTBP1,HNRNPR
1269690	mRNA Splicing - Major Pathway	BioSystems: REACTOME	1.248e-05	0.03197	0.000278	0.002343	32	188	SF3B4,SMNDC1,BCAS2,RBM22,PPIL1,FUS,USP39,SNRPA,SNRPC,SNRPD1,CPSF3,SNRPF,SNRPN,WBP11,HNRNPM,RNPS1,SF3A3,HNRNPA0,PRPF19,CPSF2,SF3B3,PRPF4,WBP4,U2AF2,HNRNPF,EFTUD2,POLR2D,SF1,PRCC,PRPF31,PTBP1,HNRNPR
PW:0000049	cysteine metabolic	Pathway Ontology	1.304e-05	0.03339	0.0002878	0.002425	6	9	GOT1,GOT2,CBS,CTH,LDHA,LDHB
1269506	MAPK6/MAPK4 signaling	BioSystems: REACTOME	1.461e-05	0.03741	0.0003198	0.002694	20	92	RPS27A,MAPKAPK5,IGF2BP1,MYC,PSME4,PSMF1,PSMA1,PSMA2,PSMA6,PSMB2,PSMB5,PSMB7,PSMC4,PSMC5,PSMD3,PSMD7,PSMD11,PSME2,RAG2,PSME3
1269825	Mitotic Anaphase	BioSystems: REACTOME	1.496e-05	0.03832	0.0003248	0.002736	31	181	SEH1L,SKA2,RPS27A,ANAPC5,NUP133,NUDC,CDC23,RCC2,PSME4,ANAPC1,PSMF1,ANAPC15,AHCTF1,PPP1CC,CENPH,PSMA1,PSMA2,PSMA6,PSMB2,PSMB5,PSMB7,PSMC4,PSMC5,PSMD3,PSMD7,PSMD11,PSME2,SPDL1,CDCA8,LMNB1,PSME3
1269596	Degradation of beta-catenin by the destruction complex	BioSystems: REACTOME	1.563e-05	0.04002	0.0003363	0.002834	19	85	RPS27A,CUL1,PSME4,BTRC,GSK3B,PSMF1,PSMA1,PSMA2,PSMA6,PSMB2,PSMB5,PSMB7,PSMC4,PSMC5,PSMD3,PSMD7,PSMD11,PSME2,PSME3
PW:0000057	carbon fixation	Pathway Ontology	1.634e-05	0.04183	0.0003459	0.002914	7	13	MDH2,ALDOA,GOT1,GOT2,TKT,PKLR,PKM
855811	Citrate cycle (TCA cycle, Krebs cycle)	BioSystems: KEGG	1.634e-05	0.04185	0.0003459	0.002914	9	22	ACO2,MDH2,FH,SDHD,SUCLG2,SUCLG1,SUCLA2,IDH3B,CS
1268933	ABC transporter disorders	BioSystems: REACTOME	1.669e-05	0.04273	0.0003461	0.002916	17	71	RPS27A,PSME4,PSMF1,DERL1,PSMA1,PSMA2,PSMA6,PSMB2,PSMB5,PSMB7,PSMC4,PSMC5,PSMD3,PSMD7,PSMD11,PSME2,PSME3
132956	Metabolic pathways	BioSystems: KEGG	1.676e-05	0.04291	0.0003461	0.002916	136	1272	GPHN,PI4K2B,ABAT,AGPAT5,ACADM,RPN2,ACLY,ACO2,ACOX1,MDH2,FAH,BPNT1,ACSM3,FECH,AHCY,POLR1B,ATP6V0D2,ALDH1B1,FH,ALDOA,POMK,UQCRHL,SDHD,MPI,HSD17B7,ST3GAL2,AGPS,PAICS,ATP6V1H,POLR3B,MTHFD1,ASAH1,ASNS,NT5C2,MTR,ATIC,COASY,FUT1,KDSR,ATP5F1A,ST6GALNAC1,ATP5PB,ATP5MC1,ATP5PF,CMPK1,AHCYL1,SRM,MTMR1,GBE1,BCAT1,BCKDHB,NDUFA1,COQ3,NDUFA9,SUCLG2,SUCLG1,NDUFAB1,SUCLA2,NDUFB5,NDUFS1,BLVRA,TWISTNB,PHOSPHO1,GLS,A…
1269823	Mitotic Metaphase and Anaphase	BioSystems: REACTOME	1.676e-05	0.04291	0.0003461	0.002916	31	182	SEH1L,SKA2,RPS27A,ANAPC5,NUP133,NUDC,CDC23,RCC2,PSME4,ANAPC1,PSMF1,ANAPC15,AHCTF1,PPP1CC,CENPH,PSMA1,PSMA2,PSMA6,PSMB2,PSMB5,PSMB7,PSMC4,PSMC5,PSMD3,PSMD7,PSMD11,PSME2,SPDL1,CDCA8,LMNB1,PSME3
104488	Cysteine and methionine metabolism	BioSystems: KEGG	1.913e-05	0.04898	0.0003919	0.003302	13	45	MDH2,AHCY,MTR,AHCYL1,SRM,BCAT1,GOT1,GOT2,CBS,ENOPH1,CTH,LDHA,LDHB
1270415	Cellular response to hypoxia	BioSystems: REACTOME	1.971e-05	0.05048	0.0003975	0.003349	18	79	RPS27A,CITED2,CUL2,PSME4,PSMF1,PSMA1,PSMA2,PSMA6,PSMB2,PSMB5,PSMB7,PSMC4,PSMC5,PSMD3,PSMD7,PSMD11,PSME2,PSME3
1270416	Regulation of Hypoxia-inducible Factor (HIF) by oxygen	BioSystems: REACTOME	1.971e-05	0.05048	0.0003975	0.003349	18	79	RPS27A,CITED2,CUL2,PSME4,PSMF1,PSMA1,PSMA2,PSMA6,PSMB2,PSMB5,PSMB7,PSMC4,PSMC5,PSMD3,PSMD7,PSMD11,PSME2,PSME3
1269197	ER-Phagosome pathway	BioSystems: REACTOME	2.219e-05	0.05684	0.000444	0.003741	19	87	RPS27A,SNAP23,PSME4,CD14,CHUK,PSMF1,PSMA1,PSMA2,PSMA6,PSMB2,PSMB5,PSMB7,PSMC4,PSMC5,PSMD3,PSMD7,PSMD11,PSME2,PSME3
83030	Aminoacyl-tRNA biosynthesis	BioSystems: KEGG	2.492e-05	0.06381	0.0004947	0.004168	16	66	MARS,WARS2,FARSA,LARS,TARS2,YARS,IARS2,NARS,MARS2,GATC,GATB,VARS,DARS,KARS,DARS2,QRSL1
1268695	Cooperation of Prefoldin and TriC/CCT in actin and tubulin folding	BioSystems: REACTOME	2.581e-05	0.06611	0.0005085	0.004284	11	34	CCT7,CCT4,CCT2,CCT5,CCT8,TUBB6,TCP1,CCT3,PFDN1,PFDN2,TUBB1
1269763	Cell Cycle, Mitotic	BioSystems: REACTOME	3.503e-05	0.08972	0.0006849	0.005771	65	517	SEH1L,MAX,MCM2,MCM3,SKA2,MCM6,MCM7,CEP76,RPS27A,MCM10,RAB8A,ANAPC5,CUL1,SKP2,NDC1,HAUS1,NUP133,GINS2,NUDC,CDC23,MYC,TUBGCP2,TUBGCP4,RCC2,NUP205,NEK2,PSME4,BTRC,CDC6,CDC25A,CDK4,ORC6,TYMS,ANAPC1,HSP90AB1,PSMF1,WEE1,ANAPC15,AHCTF1,PPP1CC,CENPH,PRKCA,NUP93,PSMA1,PSMA2,PSMA6,PSMB2,PSMB5,PSMB7,PSMC4,PSMC5,PSMD3,PSMD7,PSMD11,PSME2,SPDL1,NCAPD2,RAB1A,E2F3,RFC2,CDCA8,GMNN,LMNB1,PSME3,RPA2
1269611	PCP/CE pathway	BioSystems: REACTOME	3.87e-05	0.0991	0.0007508	0.006326	20	98	RPS27A,PSME4,PFN1,CLTA,PSMF1,PRKCA,PSMA1,PSMA2,PSMA6,PSMB2,PSMB5,PSMB7,PSMC4,PSMC5,PSMD3,PSMD7,PSMD11,PSME2,FZD3,PSME3
1269741	Cell Cycle	BioSystems: REACTOME	4.164e-05	0.1066	0.0008017	0.006755	75	624	SEH1L,MAX,MCM2,MCM3,SKA2,MCM6,MCM7,CEP76,RPS27A,MCM10,RAB8A,ABRAXAS1,ANAPC5,CUL1,SKP2,NDC1,RUVBL1,HAUS1,NUP133,GINS2,NUDC,CDC23,MYC,ATR,NBN,TUBGCP2,TUBGCP4,RUVBL2,RCC2,NUP205,NEK2,PSME4,HERC2,BTRC,TERF2,CHEK2,CDC6,CDC25A,CDK4,ORC6,TYMS,ANAPC1,HSP90AB1,PSMF1,WEE1,ANAPC15,AHCTF1,BRCC3,PPP1CC,CENPH,PRKCA,NUP93,PSMA1,PSMA2,PSMA6,PSMB2,PSMB5,PSMB7,PSMC4,PSMC5,PSMD3,PSMD7,PSMD11,PSME2,SPDL1,NCAPD2,DKC1…
1269634	Hedgehog ligand biogenesis	BioSystems: REACTOME	4.49e-05	0.115	0.0008581	0.00723	16	69	RPS27A,PSME4,PSMF1,PSMA1,PSMA2,PSMA6,PSMB2,PSMB5,PSMB7,PSMC4,PSMC5,PSMD3,PSMD7,PSMD11,PSME2,PSME3
99052	Lysosome	BioSystems: KEGG	4.551e-05	0.1165	0.0008633	0.007274	23	123	LAPTM4B,SORT1,ATP6V0D2,AP3M1,ATP6V1H,ASAH1,FUCA1,GGA2,AP3D1,AP4E1,CD68,ATP6V0A2,HEXA,HEXB,CTSC,CLTA,CTSA,CTSG,CTSL,CTSS,LAPTM5,LAMP1,LAMP2
1269203	Innate Immune System	BioSystems: REACTOME	4.977e-05	0.1275	0.0009372	0.007896	137	1312	ACLY,ACPP,ACTG1,RPS27A,TLR8,ADCY7,BRAP,PIK3R4,S100A8,S100A9,ATP8A1,MGST1,FCGR1A,ATP6V0D2,MMP9,ALDOA,MNDA,MPO,CUL1,CCT2,APP,ATP6V1H,POLR3B,THEM4,POLR3E,ASAH1,COMMD9,TBK1,CCT8,FTL,FUCA1,FUCA2,DHX36,AHCYL1,ERP44,NCKAP1,IQGAP2,SNAP23,NCF2,PGRMC1,STK10,KSR1,FAF2,PSME4,C3,ATP11A,BTRC,GPI,RAB31,NRAS,GRB2,GRN,NHLRC3,CXCL1,OLR1,GSK3B,POLR3A,GSTP1,SLCO4C1,CD14,PA2G4,PEBP1,GYG1,CD68,MCEMP1,ATP6V0A2,HEXB,HSP…
1269193	Antigen processing: Ubiquitination & Proteasome degradation	BioSystems: REACTOME	5.428e-05	0.139	0.001015	0.008549	44	314	UBA5,RPS27A,KCTD6,ANAPC5,CUL2,CUL1,UBE2J1,SKP2,CDC23,KBTBD8,BLMH,PSME4,HERC2,BTRC,CBLB,CCNF,TRIP12,UBA1,UBE3A,ANAPC1,ANAPC13,PSMF1,RCHY1,DZIP3,DCAF1,PSMA1,PSMA2,PSMA6,PSMB2,PSMB5,PSMB7,FBXL12,PSMC4,PSMC5,PSMD3,PSMD7,PSMD11,PSME2,KEAP1,ITCH,RBBP6,RNF6,UBE3D,PSME3
1268932	Disorders of transmembrane transporters	BioSystems: REACTOME	6.094e-05	0.1561	0.001125	0.00948	17	78	RPS27A,PSME4,PSMF1,DERL1,PSMA1,PSMA2,PSMA6,PSMB2,PSMB5,PSMB7,PSMC4,PSMC5,PSMD3,PSMD7,PSMD11,PSME2,PSME3
1309088	tRNA processing	BioSystems: REACTOME	6.122e-05	0.1568	0.001125	0.00948	21	109	SEH1L,TYW3,RTCB,RPP30,TRMT1,TRMT6,NDC1,NUP133,NUP205,RPP14,ELAC2,MTO1,PUS7,NUP93,TRIT1,FTSJ1,NSUN2,THG1L,TRMT61B,TSEN15,RAN
83098	Parkinson's disease	BioSystems: KEGG	6.15e-05	0.1575	0.001125	0.00948	25	142	LRRK2,UQCRHL,SDHD,UBE2J1,SLC25A5,SLC25A6,ATP5F1A,ATP5PB,ATP5MC1,ATP5PF,NDUFA1,NDUFA9,NDUFAB1,NDUFB5,NDUFS1,PARK7,UBA1,COX5A,UQCRFS1,VDAC1,VDAC2,COX6A1,COX7B,COX7C,PPIF
MAP00620_Pyruvate_metabolism	MAP00620 Pyruvate metabolism	GenMAPP	6.204e-05	0.1589	0.001126	0.009488	10	31	MDH2,ME2,ALDH1B1,GLO1,PDHA1,PKLR,PKM,DLAT,LDHA,LDHB
1269757	Activation of ATR in response to replication stress	BioSystems: REACTOME	6.244e-05	0.1599	0.001126	0.009488	11	37	MCM2,MCM3,MCM6,MCM7,MCM10,ATR,CDC6,CDC25A,ORC6,RFC2,RPA2
1270127	Respiratory electron transport, ATP synthesis by chemiosmotic coupling, and heat production by uncoupling proteins.	BioSystems: REACTOME	6.729e-05	0.1723	0.001205	0.01015	23	126	TIMMDC1,SCO1,SDHD,ATP5F1A,ATP5PB,ATP5MC1,ATP5PF,TMEM126B,NDUFA1,NDUFA9,NDUFAB1,NDUFB5,NDUFS1,COX18,COX5A,UQCRFS1,COX6A1,COX7B,COX7C,ATP5MF,LRPPRC,TRAP1,NDUFAF1
1269904	ABC-family proteins mediated transport	BioSystems: REACTOME	7.036e-05	0.1802	0.001251	0.01054	21	110	ABCF1,RPS27A,PSME4,EIF2S2,PSMF1,DERL1,PSMA1,PSMA2,PSMA6,PSMB2,PSMB5,PSMB7,PSMC4,PSMC5,PSMD3,PSMD7,PSMD11,PSME2,ABCE1,EIF2S3,PSME3
1268680	Cap-dependent Translation Initiation	BioSystems: REACTOME	7.639e-05	0.1956	0.00134	0.01129	23	127	RPL29,RPS8,RPS23,RPS25,RPS27A,EIF3L,EIF3M,EIF3A,EIF3B,EIF3C,EIF3D,EIF3G,EIF3I,EIF2B3,EIF2B5,EIF2S2,EIF4H,EIF3E,EIF1AX,EIF2B1,EIF2S3,RPL9,RPL12
1268679	Eukaryotic Translation Initiation	BioSystems: REACTOME	7.639e-05	0.1956	0.00134	0.01129	23	127	RPL29,RPS8,RPS23,RPS25,RPS27A,EIF3L,EIF3M,EIF3A,EIF3B,EIF3C,EIF3D,EIF3G,EIF3I,EIF2B3,EIF2B5,EIF2S2,EIF4H,EIF3E,EIF1AX,EIF2B1,EIF2S3,RPL9,RPL12
1269710	Cytosolic tRNA aminoacylation	BioSystems: REACTOME	7.776e-05	0.1991	0.001346	0.01134	9	26	MARS,FARSA,LARS,YARS,NARS,VARS,PPA1,DARS,KARS
1268697	Formation of tubulin folding intermediates by CCT/TriC	BioSystems: REACTOME	7.776e-05	0.1991	0.001346	0.01134	9	26	CCT7,CCT4,CCT2,CCT5,CCT8,TUBB6,TCP1,CCT3,TUBB1
1269176	Downstream TCR signaling	BioSystems: REACTOME	8.114e-05	0.2078	0.001395	0.01175	20	103	RPS27A,CUL1,PSME4,BTRC,CHUK,PIK3R1,PSMF1,PSMA1,PSMA2,PSMA6,PSMB2,PSMB5,PSMB7,PSMC4,PSMC5,PSMD3,PSMD7,PSMD11,PSME2,PSME3
MAP00710_Carbon_fixation	MAP00710 Carbon fixation	GenMAPP	8.887e-05	0.2276	0.001517	0.01278	7	16	MDH2,ALDOA,GOT1,GOT2,PGK1,PKLR,PKM
1270170	Metabolism of polyamines	BioSystems: REACTOME	0.0001053	0.2696	0.001786	0.01505	18	89	SRM,PSME4,GOT1,ENOPH1,PSMF1,PSMA1,PSMA2,PSMA6,PSMB2,PSMB5,PSMB7,PSMC4,PSMC5,PSMD3,PSMD7,PSMD11,PSME2,PSME3
82998	Pyruvate metabolism	BioSystems: KEGG	0.0001063	0.2723	0.001791	0.01509	11	39	MDH2,ME2,ALDH1B1,FH,GLO1,PDHA1,PKLR,PKM,DLAT,LDHA,LDHB
1269303	C-type lectin receptors (CLRs)	BioSystems: REACTOME	0.0001099	0.2815	0.00184	0.0155	25	147	RPS27A,CUL1,AHCYL1,PSME4,BTRC,NRAS,CLEC7A,CHUK,PSMF1,PPP3CA,PSMA1,PSMA2,PSMA6,PSMB2,PSMB5,PSMB7,PSMC4,PSMC5,PSMD3,PSMD7,PSMD11,PSME2,KRAS,PSME3,LYN
MAP00271_Methionine_metabolism	MAP00271 Methionine metabolism	GenMAPP	0.0001156	0.296	0.00191	0.01609	5	8	MARS,AHCY,MTR,CBS,CTH
1268687	Recycling of eIF2:GDP	BioSystems: REACTOME	0.0001156	0.296	0.00191	0.01609	5	8	EIF2B3,EIF2B5,EIF2S2,EIF2B1,EIF2S3
1269731	Metabolism of non-coding RNA	BioSystems: REACTOME	0.0001247	0.3194	0.002034	0.01714	13	53	SEH1L,PRMT5,NDC1,NUP133,SMN2,SNRPD1,SNRPF,NUP205,CLNS1A,WDR77,GEMIN5,NUP93,GEMIN7
1269732	snRNP Assembly	BioSystems: REACTOME	0.0001247	0.3194	0.002034	0.01714	13	53	SEH1L,PRMT5,NDC1,NUP133,SMN2,SNRPD1,SNRPF,NUP205,CLNS1A,WDR77,GEMIN5,NUP93,GEMIN7
1427861	UCH proteinases	BioSystems: REACTOME	0.0001407	0.3604	0.002281	0.01922	20	107	RPS27A,RUVBL1,PSME4,TGFBR1,UCHL3,PSMF1,PSMA1,PSMA2,PSMA6,PSMB2,PSMB5,PSMB7,PSMC4,PSMC5,PSMD3,PSMD7,PSMD11,PSME2,ACTR8,PSME3
83054	Cell cycle	BioSystems: KEGG	0.0001484	0.3801	0.00239	0.02014	22	124	MCM2,MCM3,MCM6,MCM7,ANAPC5,CUL1,SKP2,CDC23,MYC,ATR,GSK3B,CHEK2,CDC6,CDC25A,CDK4,ORC6,ANAPC1,ANAPC13,WEE1,PRKDC,E2F3,SMAD4
83036	Ribosome	BioSystems: KEGG	0.0002341	0.5995	0.003747	0.03157	25	154	RPL29,RPS8,MRPL30,RPS23,RPS25,RPS27A,MRPL35,MRPL13,MRPL15,MRPL3,MRPS21,MRPS15,MRPS9,MRPS5,MRPL32,MRPL11,MRPL9,MRPL16,MRPL20,MRPS16,MRPL2,MRPS7,RSL24D1,RPL9,RPL12
MAP00272_Cysteine_metabolism	MAP00272 Cysteine metabolism	GenMAPP	0.0002438	0.6243	0.003878	0.03267	5	9	GOT1,GOT2,CTH,LDHA,LDHB
83056	Ubiquitin mediated proteolysis	BioSystems: KEGG	0.0002483	0.6359	0.003926	0.03308	23	137	ANAPC5,CUL4B,CUL2,CUL1,UBE2J1,SKP2,CDC23,PRPF19,HERC2,BTRC,CBL,CBLB,PIAS2,TRIP12,ERCC8,UBA1,UBE3A,ANAPC1,ANAPC13,RCHY1,KEAP1,ITCH,UBA2
PW:0000043	pyruvate metabolic	Pathway Ontology	0.00027	0.6914	0.004242	0.03574	9	30	MDH2,PDHA1,PDK1,PDK3,PKLR,PKM,DLAT,LDHA,LDHB
1269640	Hedgehog 'on' state	BioSystems: REACTOME	0.0003335	0.854	0.005189	0.04372	17	89	RPS27A,PSME4,PSMF1,PSMA1,PSMA2,PSMA6,PSMB2,PSMB5,PSMB7,PSMC4,PSMC5,PSMD3,PSMD7,PSMD11,PSME2,ITCH,PSME3
413348	Citrate cycle, second carbon oxidation, 2-oxoglutarate => oxaloacetate	BioSystems: KEGG	0.0003343	0.8561	0.005189	0.04372	6	14	MDH2,FH,SDHD,SUCLG2,SUCLG1,SUCLA2
1269329	TNFR2 non-canonical NF-kB pathway	BioSystems: REACTOME	0.0003587	0.9186	0.005534	0.04663	19	106	RPS27A,CUL1,PSME4,BTRC,CHUK,PSMF1,PSMA1,PSMA2,PSMA6,PSMB2,PSMB5,PSMB7,PSMC4,PSMC5,PSMD3,PSMD7,PSMD11,PSME2,PSME3
1269797	Mitotic G2-G2/M phases	BioSystems: REACTOME	0.0003721	0.953	0.005706	0.04808	28	186	CEP76,RPS27A,RAB8A,CUL1,HAUS1,TUBGCP2,TUBGCP4,NEK2,PSME4,BTRC,CDC25A,HSP90AB1,PSMF1,WEE1,PSMA1,PSMA2,PSMA6,PSMB2,PSMB5,PSMB7,PSMC4,PSMC5,PSMD3,PSMD7,PSMD11,PSME2,E2F3,PSME3
1269172	TCR signaling	BioSystems: REACTOME	0.0004024	1	0.006134	0.05168	21	124	RPS27A,CUL1,PSME4,BTRC,CHUK,PIK3R1,PSMF1,PSMA1,PSMA2,PSMA6,PSMB2,PSMB5,PSMB7,PSMC4,PSMC5,PSMD3,PSMD7,PSMD11,PSME2,PTPRJ,PSME3
1427862	Ub-specific processing proteases	BioSystems: REACTOME	0.0004181	1	0.006336	0.05339	32	225	RPS27A,USP28,SKP2,RUVBL1,BECN1,MYC,PSME4,USP22,TGFBR1,USP10,CDC25A,DDX58,VDAC1,VDAC2,PSMF1,PSMA1,PSMA2,PSMA6,PSMB2,PSMB5,PSMB7,PSMC4,PSMC5,PSMD3,PSMD7,PSMD11,PSME2,KEAP1,TOMM70,PSME3,RHOT1,SMAD4
MAP00450_Selenoamino_acid_metabolism	MAP00450 Selenoamino acid metabolism	GenMAPP	0.0004388	1	0.006572	0.05537	4	6	MARS,AHCY,CBS,CTH
413392	Inosine monophosphate biosynthesis, PRPP + glutamine => IMP	BioSystems: KEGG	0.0004388	1	0.006572	0.05537	4	6	PAICS,ATIC,PFAS,PPAT
M5374	The SARS-coronavirus Life Cycle	MSigDB C2 BIOCARTA (v6.0)	0.0004571	1	0.006671	0.05621	5	10	FBL,NCL,MAPK14,LDHA,LDHB
1268858	Constitutive Signaling by Ligand-Responsive EGFR Cancer Variants	BioSystems: REACTOME	0.0004597	1	0.006671	0.05621	7	20	RPS27A,NRAS,GRB2,CBL,CDC37,PIK3R1,KRAS
1268857	Signaling by Ligand-Responsive EGFR Variants in Cancer	BioSystems: REACTOME	0.0004597	1	0.006671	0.05621	7	20	RPS27A,NRAS,GRB2,CBL,CDC37,PIK3R1,KRAS
M16991	Skeletal muscle hypertrophy is regulated via AKT/mTOR pathway	MSigDB C2 BIOCARTA (v6.0)	0.0004597	1	0.006671	0.05621	7	20	RPS6KB1,EIF2B5,EIF2S2,GSK3B,PIK3R1,IGF1R,EIF2S3
1268856	Signaling by EGFR in Cancer	BioSystems: REACTOME	0.0004597	1	0.006671	0.05621	7	20	RPS27A,NRAS,GRB2,CBL,CDC37,PIK3R1,KRAS
83004	Propanoate metabolism	BioSystems: KEGG	0.000461	1	0.006671	0.05621	9	32	ABAT,ACADM,ECHDC1,BCKDHB,SUCLG2,SUCLG1,SUCLA2,LDHA,LDHB
153910	Phagosome	BioSystems: KEGG	0.0005724	1	0.008236	0.06939	24	154	ACTG1,STX18,FCGR1A,ATP6V0D2,MPO,ATP6V1H,NCF2,TUBB6,C3,CANX,OLR1,THBS1,CD14,ATP6V0A2,CLEC7A,TUBB1,CTSL,CTSS,CYBB,ITGA5,ITGAV,RAB7A,LAMP1,LAMP2
1268688	L13a-mediated translational silencing of Ceruloplasmin expression	BioSystems: REACTOME	0.0006059	1	0.008621	0.07264	20	119	RPL29,RPS8,RPS23,RPS25,RPS27A,EIF3L,EIF3M,EIF3A,EIF3B,EIF3C,EIF3D,EIF3G,EIF3I,EIF2S2,EIF4H,EIF3E,EIF1AX,EIF2S3,RPL9,RPL12
1268686	GTP hydrolysis and joining of the 60S ribosomal subunit	BioSystems: REACTOME	0.0006059	1	0.008621	0.07264	20	119	RPL29,RPS8,RPS23,RPS25,RPS27A,EIF3L,EIF3M,EIF3A,EIF3B,EIF3C,EIF3D,EIF3G,EIF3I,EIF2S2,EIF4H,EIF3E,EIF1AX,EIF2S3,RPL9,RPL12
MAP00252_Alanine_and_aspartate_metabolism	MAP00252 Alanine and aspartate metabolism	GenMAPP	0.0006447	1	0.009122	0.07686	7	21	ABAT,ASNS,NARS,GOT1,GOT2,DARS,DDX3X
1270262	Apoptosis	BioSystems: REACTOME	0.0006656	1	0.009365	0.07891	26	174	RPS27A,STK26,PSME4,NMT1,OPA1,CD14,TJP2,PMAIP1,PSMF1,APPL1,PSMA1,PSMA2,PSMA6,PSMB2,PSMB5,PSMB7,PSMC4,PSMC5,PSMD3,PSMD7,PSMD11,PSME2,DFFA,KPNB1,LMNB1,PSME3
1270128	Respiratory electron transport	BioSystems: REACTOME	0.0006949	1	0.009725	0.08194	18	103	TIMMDC1,SCO1,SDHD,TMEM126B,NDUFA1,NDUFA9,NDUFAB1,NDUFB5,NDUFS1,COX18,COX5A,UQCRFS1,COX6A1,COX7B,COX7C,LRPPRC,TRAP1,NDUFAF1
1269799	G2/M Transition	BioSystems: REACTOME	0.000705	1	0.009813	0.08268	27	184	CEP76,RPS27A,RAB8A,CUL1,HAUS1,TUBGCP2,TUBGCP4,NEK2,PSME4,BTRC,CDC25A,HSP90AB1,PSMF1,WEE1,PSMA1,PSMA2,PSMA6,PSMB2,PSMB5,PSMB7,PSMC4,PSMC5,PSMD3,PSMD7,PSMD11,PSME2,PSME3
M7721	Eukaryotic protein translation	MSigDB C2 BIOCARTA (v6.0)	0.0007811	1	0.01065	0.0897	6	16	EIF3A,EIF2S2,EEF2K,EEF2,EIF1AX,EIF2S3
1268860	Constitutive Signaling by EGFRvIII	BioSystems: REACTOME	0.0007811	1	0.01065	0.0897	6	16	NRAS,GRB2,CBL,CDC37,PIK3R1,KRAS
1268859	Signaling by EGFRvIII in Cancer	BioSystems: REACTOME	0.0007811	1	0.01065	0.0897	6	16	NRAS,GRB2,CBL,CDC37,PIK3R1,KRAS
83116	Chronic myeloid leukemia	BioSystems: KEGG	0.0007844	1	0.01065	0.0897	14	71	MYC,NRAS,GRB2,CBL,CBLB,TGFBR1,CDK4,CHUK,PIK3R1,CRK,PTPN11,KRAS,E2F3,SMAD4
M6924	Regulation of eIF2	MSigDB C2 BIOCARTA (v6.0)	0.0007857	1	0.01065	0.0897	5	11	EIF2B5,EIF2S2,GSK3B,EIF2S3,EIF2AK4
1270123	Pyruvate metabolism	BioSystems: REACTOME	0.0008495	1	0.01143	0.09634	8	28	SLC16A1,GLO1,PDHA1,PDK1,PDK3,DLAT,LDHA,LDHB
1268854	Disease	BioSystems: REACTOME	0.0008528	1	0.01143	0.09634	91	867	SEH1L,RPL29,KREMEN1,RPS8,RPS23,RPS25,RPS27A,BRAP,MIB1,CUL1,SLC25A5,SLC25A6,NELFCD,APP,ATP6V1H,NDC1,NUP133,MTR,MYC,RNMT,SSRP1,STAT3,NUP205,KSR1,PSME4,SUPT4H1,TAF5,TAF12,NMT1,TAF13,BTRC,NRAS,CANX,CAPNS1,GRB2,CBL,GRSF1,GSK3B,CDC37,TGFBR1,THBS1,GTF2H1,CD14,PEBP1,GYG1,PRDX1,SUPT16H,HEY2,CDC25A,CDK8,HMGA1,CHUK,PHB,TXNRD1,PIK3R1,CLTA,HSP90AB1,PSMF1,DERL1,POLR2D,BAG4,XRCC5,VCAN,NUP93,ZC3HAV1,PSMA1,PSMA2,…
1270261	Programmed Cell Death	BioSystems: REACTOME	0.0008639	1	0.01152	0.09709	26	177	RPS27A,STK26,PSME4,NMT1,OPA1,CD14,TJP2,PMAIP1,PSMF1,APPL1,PSMA1,PSMA2,PSMA6,PSMB2,PSMB5,PSMB7,PSMC4,PSMC5,PSMD3,PSMD7,PSMD11,PSME2,DFFA,KPNB1,LMNB1,PSME3
1268693	Protein folding	BioSystems: REACTOME	0.0008784	1	0.0116	0.0977	18	105	XRN2,NOP56,ARFGEF2,CCT7,CCT4,CCT2,AP3M1,CCT5,CCT8,STAT3,TUBB6,TBCE,TCP1,CCT3,PFDN1,PFDN2,TUBB1,DCAF7
82946	Pyrimidine metabolism	BioSystems: KEGG	0.0008784	1	0.0116	0.0977	18	105	POLR1B,POLR3B,POLR3E,NT5C2,CMPK1,TWISTNB,POLR3A,POLR1E,NME1-NME2,TXNRD1,TYMS,PNPT1,CTPS2,UMPS,DCTPP1,POLR1A,POLR2D,CTPS1
169344	C-MYC pathway	BioSystems: Pathway Interaction Database	0.0008842	1	0.01161	0.09784	7	22	MAX,SKP2,RUVBL1,MYC,RUVBL2,TAF12,GSK3B
1270133	Metabolism of nucleotides	BioSystems: REACTOME	0.0009362	1	0.0122	0.1028	17	97	PAICS,NT5C2,ATIC,CMPK1,GSR,PFAS,TXN,TXNRD1,TYMS,CTPS2,HPRT1,UMPS,DCTPP1,PPAT,CTPS1,IMPDH2,ENTPD7
1269633	Signaling by Hedgehog	BioSystems: REACTOME	0.0009386	1	0.0122	0.1028	22	141	RPS27A,ADCY7,CUL1,PSME4,BTRC,GSK3B,PSMF1,PRKAR2A,PSMA1,PSMA2,PSMA6,PSMB2,PSMB5,PSMB7,PSMC4,PSMC5,PSMD3,PSMD7,PSMD11,PSME2,ITCH,PSME3
82942	Oxidative phosphorylation	BioSystems: KEGG	0.001039	1	0.01343	0.1132	21	133	ATP6V0D2,UQCRHL,SDHD,ATP6V1H,ATP5F1A,ATP5PB,ATP5MC1,ATP5PF,NDUFA1,NDUFA9,NDUFAB1,NDUFB5,NDUFS1,ATP6V0A2,COX5A,UQCRFS1,COX6A1,COX7B,COX7C,ATP5MF,PPA1
M12975	VEGF, Hypoxia, and Angiogenesis	MSigDB C2 BIOCARTA (v6.0)	0.001096	1	0.0141	0.1188	8	29	EIF2B3,EIF2B5,EIF2S2,PIK3R1,PRKCA,EIF1AX,EIF2B1,EIF2S3
82969	Selenocompound metabolism	BioSystems: KEGG	0.00113	1	0.01447	0.1219	6	17	MARS,MTR,MARS2,KYAT3,TXNRD1,CTH
1268694	Chaperonin-mediated protein folding	BioSystems: REACTOME	0.001185	1	0.01507	0.127	17	99	XRN2,NOP56,ARFGEF2,CCT7,CCT4,CCT2,AP3M1,CCT5,CCT8,STAT3,TUBB6,TCP1,CCT3,PFDN1,PFDN2,TUBB1,DCAF7
1268850	BBSome-mediated cargo-targeting to cilium	BioSystems: REACTOME	0.001189	1	0.01507	0.127	7	23	MKKS,CCT4,CCT2,CCT5,CCT8,TCP1,CCT3
1270135	Purine ribonucleoside monophosphate biosynthesis	BioSystems: REACTOME	0.001263	1	0.01578	0.1329	5	12	PAICS,ATIC,PFAS,PPAT,IMPDH2
1269785	Unwinding of DNA	BioSystems: REACTOME	0.001263	1	0.01578	0.1329	5	12	MCM2,MCM3,MCM6,MCM7,GINS2
M8179	Rab GTPases Mark Targets In The Endocytotic Machinery	MSigDB C2 BIOCARTA (v6.0)	0.001263	1	0.01578	0.1329	5	12	RAB8A,RAB9A,RAB7A,RAB1A,RAB27A
MAP00010_Glycolysis_Gluconeogenesis	MAP00010 Glycolysis Gluconeogenesis	GenMAPP	0.001542	1	0.01917	0.1615	11	52	ALDH1B1,ALDOA,GPI,PDHA1,PGK1,PKLR,PKM,DLAT,LDHA,LDHB,ENO1
M6682	CDK Regulation of DNA Replication	MSigDB C2 BIOCARTA (v6.0)	0.001587	1	0.01954	0.1647	6	18	MCM2,MCM3,MCM6,MCM7,CDC6,ORC6
714485	2-Oxocarboxylic acid metabolism	BioSystems: KEGG	0.001587	1	0.01954	0.1647	6	18	ACO2,BCAT1,GOT1,GOT2,IDH3B,CS
142344	malate-aspartate shuttle	BioSystems: BIOCYC	0.001653	1	0.01997	0.1683	3	4	MDH2,GOT1,GOT2
545283	molybdenum cofactor biosynthesis	BioSystems: BIOCYC	0.001653	1	0.01997	0.1683	3	4	GPHN,MOCS3,NFS1
PW:0000063	glyoxylate and dicarboxylate metabolic	Pathway Ontology	0.001653	1	0.01997	0.1683	3	4	ACO2,MDH2,MTHFD1
P02730	Asparagine and aspartate biosynthesis	PantherDB	0.001653	1	0.01997	0.1683	3	4	ASNS,GOT1,GOT2
1270159	Amino acid synthesis and interconversion (transamination)	BioSystems: REACTOME	0.001758	1	0.02114	0.1781	8	31	ASNS,GLS,GOT1,GOT2,OAT,PYCR2,PSAT1,PHGDH
1270420	Detoxification of Reactive Oxygen Species	BioSystems: REACTOME	0.001774	1	0.02123	0.1788	9	38	NCF2,GSR,GSTP1,PRDX1,TXN,TXNRD1,PRDX5,TXN2,CYBB
M6831	The Citric Acid Cycle	MSigDB C2 BIOCARTA (v6.0)	0.001809	1	0.02155	0.1815	4	8	ACO2,FH,SUCLA2,CS
1270142	Synthesis and interconversion of nucleotide di- and triphosphates	BioSystems: REACTOME	0.002038	1	0.02406	0.2027	7	25	CMPK1,GSR,TXN,TXNRD1,CTPS2,DCTPP1,CTPS1
PW:0000048	methionine cycle/metabolic	Pathway Ontology	0.002038	1	0.02406	0.2027	7	25	PRMT5,AHCY,MTR,RNMT,CBS,MRM2,CTH
1270425	Regulation of HSF1-mediated heat shock response	BioSystems: REACTOME	0.002113	1	0.02483	0.2092	13	70	SEH1L,HSPA4L,NDC1,NUP133,ATR,NUP205,GSK3B,DNAJC7,HSPA4,BAG4,BAG3,NUP93,RPA2
1269773	Activation of the pre-replicative complex	BioSystems: REACTOME	0.002191	1	0.0255	0.2149	8	32	MCM2,MCM3,MCM6,MCM7,MCM10,CDC6,ORC6,RPA2
83037	RNA polymerase	BioSystems: KEGG	0.002191	1	0.0255	0.2149	8	32	POLR1B,POLR3B,POLR3E,TWISTNB,POLR3A,POLR1E,POLR1A,POLR2D
1269610	Beta-catenin independent WNT signaling	BioSystems: REACTOME	0.002319	1	0.02687	0.2264	22	151	RPS27A,NLK,PSME4,PFN1,CLTA,PSMF1,PPP3CA,PRKCA,PSMA1,PSMA2,PSMA6,PSMB2,PSMB5,PSMB7,PSMC4,PSMC5,PSMD3,PSMD7,PSMD11,PSME2,FZD3,PSME3
1269654	Transcriptional Regulation by TP53	BioSystems: REACTOME	0.002408	1	0.02777	0.234	44	374	RPS27A,CNOT6,PRMT5,SCO1,CNOT11,NELFCD,SGK1,MAPKAPK5,ATR,NBN,SSRP1,SUPT4H1,GLS,TAF5,TAF12,TAF13,GPI,COX18,GSR,CCNG1,GTF2H1,CNOT9,PRDX1,SUPT16H,CHEK2,MTA2,CHD4,TXN,TXNRD1,COX5A,PLAGL1,PRDX5,PMAIP1,COX6A1,POLR2D,COX7B,COX7C,MAPK14,SMYD2,RABGGTB,ARID3A,RFC2,LRPPRC,RPA2
125136	Spliceosome	BioSystems: KEGG	0.002695	1	0.03095	0.2607	20	134	SF3B4,SMNDC1,BCAS2,RBM22,PPIL1,USP39,SNRPA,SNRPC,SNRPD1,SNRPF,WBP11,HNRNPM,SF3A3,PRPF19,SF3B3,PRPF4,U2AF2,EFTUD2,PRPF31,DHX8
1427860	Deubiquitination	BioSystems: REACTOME	0.002751	1	0.03145	0.265	37	303	RPS27A,ABRAXAS1,USP28,SKP2,RUVBL1,BECN1,MYC,PSME4,USP22,TGFBR1,USP10,CDC25A,DDX58,UCHL3,VDAC1,VDAC2,PSMF1,BRCC3,PSMA1,PSMA2,PSMA6,PSMB2,PSMB5,PSMB7,PSMC4,PSMC5,PSMD3,PSMD7,PSMD11,PSME2,KEAP1,OTUD7B,TOMM70,ACTR8,PSME3,RHOT1,SMAD4
142283	superpathway of pyrimidine ribonucleotides de novo biosynthesis	BioSystems: BIOCYC	0.002808	1	0.03187	0.2685	5	14	CMPK1,NME1-NME2,CTPS2,UMPS,CTPS1
1268681	Formation of a pool of free 40S subunits	BioSystems: REACTOME	0.002812	1	0.03187	0.2685	17	107	RPL29,RPS8,RPS23,RPS25,RPS27A,EIF3L,EIF3M,EIF3A,EIF3B,EIF3C,EIF3D,EIF3G,EIF3I,EIF3E,EIF1AX,RPL9,RPL12
83100	Huntington's disease	BioSystems: KEGG	0.003026	1	0.03408	0.2871	26	193	UQCRHL,SDHD,SLC25A5,SLC25A6,ATP5F1A,ATP5PB,ATP5MC1,ATP5PF,NDUFA1,NDUFA9,NDUFAB1,NDUFB5,NDUFS1,TFAM,TGM2,COX5A,CLTA,UQCRFS1,VDAC1,VDAC2,CREB3L2,COX6A1,POLR2D,COX7B,COX7C,PPIF
1269619	SHC-related events triggered by IGF1R	BioSystems: REACTOME	0.003061	1	0.03408	0.2871	4	9	NRAS,GRB2,IGF1R,KRAS
SMP00029	Selenoamino Acid Metabolism	SMPDB	0.003061	1	0.03408	0.2871	4	9	MARS,AHCY,CBS,CTH
1269593	EGFR Transactivation by Gastrin	BioSystems: REACTOME	0.003061	1	0.03408	0.2871	4	9	NRAS,GRB2,PRKCA,KRAS
1270181	Sulfur amino acid metabolism	BioSystems: REACTOME	0.003295	1	0.03637	0.3065	7	27	AHCY,MTR,GOT1,CBS,SQOR,ENOPH1,CTH
1268762	ATF4 activates genes	BioSystems: REACTOME	0.003295	1	0.03637	0.3065	7	27	CCL2,DIS3,ASNS,EXOSC8,EXOSC9,CXCL8,EXOSC3
1269665	RNA Polymerase III Abortive And Retractive Initiation	BioSystems: REACTOME	0.00369	1	0.04024	0.339	9	42	SNAPC5,POLR3B,POLR3E,SSB,POLR3A,GTF3A,GTF3C1,GTF3C2,GTF3C6
1269664	RNA Polymerase III Transcription	BioSystems: REACTOME	0.00369	1	0.04024	0.339	9	42	SNAPC5,POLR3B,POLR3E,SSB,POLR3A,GTF3A,GTF3C1,GTF3C2,GTF3C6
1269183	Signaling by the B Cell Receptor (BCR)	BioSystems: REACTOME	0.003692	1	0.04024	0.339	30	236	RPS27A,CUL1,THEM4,AHCYL1,PSME4,BTRC,NRAS,GRB2,CBL,CBLB,GSK3B,CHUK,PIK3R1,PSMF1,PSMA1,PSMA2,PSMA6,PSMB2,PSMB5,PSMB7,PSMC4,PSMC5,PSMD3,PSMD7,PSMD11,PSME2,PTPN11,KRAS,PSME3,LYN
782390	superpathway of pyrimidine deoxyribonucleotides de novo biosynthesis	BioSystems: BIOCYC	0.003811	1	0.04135	0.3484	6	21	CMPK1,NME1-NME2,TYMS,CTPS2,UMPS,CTPS1
1268701	Post-translational protein modification	BioSystems: REACTOME	0.003971	1	0.04291	0.3615	102	1041	SEH1L,RPN2,CD109,RPS27A,RAB8A,ABRAXAS1,POMK,MPI,COPG1,USP28,ST3GAL2,SKP2,ARCN1,EDEM3,NOP58,NDC1,DPH5,YKT6,RUVBL1,NUP133,UGGT2,FUCA1,RAB21,BECN1,TRAPPC2L,ST6GALNAC1,MYC,DCTN5,SEC24A,NUP205,PSME4,HERC2,ALG1,RAB31,USP22,CANX,PIAS2,TGFBR1,USP10,THBS1,TRAPPC10,CDC25A,DDX58,CTSC,MGAT4A,TRAPPC1,B4GALT5,UBA1,RAB9A,UCHL3,ALG8,PLAUR,METTL22,VDAC1,VDAC2,PSMF1,DERL1,GNPNAT1,BRCC3,CTSA,PPP6C,CTR9,NUS1,PRKCSH,…
1269810	M Phase	BioSystems: REACTOME	0.004267	1	0.04591	0.3868	37	311	SEH1L,SKA2,RPS27A,ANAPC5,NDC1,NUP133,NUDC,CDC23,RCC2,NUP205,PSME4,ANAPC1,PSMF1,ANAPC15,AHCTF1,PPP1CC,CENPH,PRKCA,NUP93,PSMA1,PSMA2,PSMA6,PSMB2,PSMB5,PSMB7,PSMC4,PSMC5,PSMD3,PSMD7,PSMD11,PSME2,SPDL1,NCAPD2,RAB1A,CDCA8,LMNB1,PSME3
1269185	Downstream signaling events of B Cell Receptor (BCR)	BioSystems: REACTOME	0.004588	1	0.04916	0.4142	26	199	RPS27A,CUL1,THEM4,PSME4,BTRC,NRAS,GRB2,GSK3B,CHUK,PIK3R1,PSMF1,PSMA1,PSMA2,PSMA6,PSMB2,PSMB5,PSMB7,PSMC4,PSMC5,PSMD3,PSMD7,PSMD11,PSME2,PTPN11,KRAS,PSME3

## Sheet: pathway_AB
ID	Name	Source	p-value	q-value Bonferroni	q-value FDR B&H	q-value FDR B&Y	Hit Count in Query List	Hit Count in Genome	Hit in Query List
1270225	Erythrocytes take up oxygen and release carbon dioxide	BioSystems: REACTOME	4.413e-07	0.0003685	0.0003685	0.002692	4	9	CA1,CA2,AQP1,HBB
1270223	O2/CO2 exchange in erythrocytes	BioSystems: REACTOME	2.444e-06	0.002041	0.0006803	0.00497	4	13	CA1,CA2,AQP1,HBB
1270224	Erythrocytes take up carbon dioxide and release oxygen	BioSystems: REACTOME	2.444e-06	0.002041	0.0006803	0.00497	4	13	CA1,CA2,AQP1,HBB
1108783	purine deoxyribonucleosides degradation	BioSystems: BIOCYC	6.181e-05	0.05161	0.0129	0.09426	2	2	ADA,PNP
547495	adenine and adenosine salvage III	BioSystems: BIOCYC	0.0001831	0.1529	0.02548	0.1861	2	3	ADA,PNP
142432	purine ribonucleosides degradation to ribose-1-phosphate	BioSystems: BIOCYC	0.0001831	0.1529	0.02548	0.1861	2	3	ADA,PNP
1144995	Sphingolipid signaling pathway	BioSystems: KEGG	0.0003304	0.2758	0.03941	0.2879	6	118	SPTLC3,MAP3K5,SGPP1,FCER1A,MS4A2,PPP2R5B

## Sheet: GO_BP_FL
ID	Name	p-value	q-value Bonferroni	q-value FDR B&H	q-value FDR B&Y	Hit Count in Query List	Hit Count in Genome	Hit in Query List
GO:0022613	ribonucleoprotein complex biogenesis	1.639e-50	1.185e-46	1.185e-46	1.122e-45	139	468	TSR2,RPL29,ABCF1,FBL,MRM1,RPS8,RPS23,RPS25,RPS27A,ADAR,NUFIP1,CNOT6,UTP15,NSA2,PRMT5,NAF1,EIF3L,RPF2,EIF3M,RPF1,NSUN4,XRN2,NOP56,NOP16,NOA1,NOB1,RPP30,PYURF,CHD7,ERI1,DDX27,DIS3,RRP1,RBM22,NOP58,NOP14,DIEXF,TSR1,PDCD11,WDR12,SMN2,EIF3A,EIF3B,EIF3C,EIF3D,USP39,EIF3G,EIF3I,SNRPC,SNRPD1,SNRPF,FTSJ3,UTP6,WBP11,ATR,RRP1B,MAK16,SRPK2,NCL,WDR43,WDR3,DIMT1,CDC123,RRP36,RRS1,BYSL,SF3A3,C1QBP,PRPF19,UTP20,…
GO:0034660	ncRNA metabolic process	5.321e-43	3.849e-39	1.925e-39	1.821e-38	143	563	UBA5,TSR2,RPL29,FBL,MARS,MRM1,RPS8,SNAPC5,RPS23,RPS25,RPS27A,ADAR,WARS2,LRRC47,FARSA,INTS2,UTP15,NSA2,NAF1,RPF2,POLR1B,ELAC1,RPF1,NSUN4,XRN2,TYW3,NOP56,RTCB,LIN28B,NOB1,RPP30,LARS,TRMT1,PYURF,CHD7,ERI1,TARS2,DDX27,DIS3,TRUB2,YARS,RRP1,NIFK,NOP58,IARS2,TRMT6,NOP14,DIEXF,TSR1,INTS13,CDK5RAP1,PDCD11,INTS9,WDR12,FTSJ3,UTP6,WBP11,RRP1B,MAK16,NARS,NCL,SSB,DUS1L,WDR43,WDR3,TAF8,DIMT1,MOCS3,RRP36,RRS1,BY…
GO:0006396	RNA processing	3.719e-41	2.69e-37	8.965e-38	8.485e-37	186	913	UBA5,TSR2,RPL29,ZNF326,SF3B4,FBL,SMNDC1,BCAS2,MRM1,RPS8,RPS23,RPS25,RPS27A,ADAR,SCAF4,NUFIP1,SAFB,INTS2,UTP15,NSA2,PRMT5,NAF1,RPF2,ELAC1,SYNCRIP,DUSP11,RPF1,NSUN4,XRN2,TYW3,NOP56,DCPS,RTCB,LIN28B,NOB1,RPP30,TRMT1,PYURF,CHD7,ERI1,APP,DDX27,DIS3,THOC5,TRUB2,RRP1,RBM22,NOP58,TRMT6,SNRNP48,NOP14,DIEXF,TSR1,PPP4R2,RBMX2,PPIL1,CDK5RAP1,PDCD11,INTS9,WDR12,SMN2,DHX32,FUS,USP39,SNRPA,SNRPC,SNRPD1,CPSF3,SN…
GO:0042254	ribosome biogenesis	6.643e-36	4.805e-32	1.09e-32	1.031e-31	97	322	TSR2,RPL29,ABCF1,FBL,MRM1,RPS8,RPS23,RPS25,RPS27A,UTP15,NSA2,NAF1,RPF2,RPF1,NSUN4,XRN2,NOP56,NOP16,NOA1,NOB1,RPP30,PYURF,CHD7,ERI1,DDX27,DIS3,RRP1,NOP58,NOP14,DIEXF,TSR1,PDCD11,WDR12,FTSJ3,UTP6,WBP11,RRP1B,MAK16,NCL,WDR43,WDR3,DIMT1,RRP36,RRS1,BYSL,C1QBP,UTP20,EBNA1BP2,NOP2,RPP14,PA2G4,NOM1,UTP4,PES1,LTV1,DDX21,NOLC1,GTPBP4,EXOSC8,GNL2,MRM2,EXOSC9,WDR36,NOL11,ZNHIT6,MRPS9,MRPL11,RSL1D1,NOL6,BMS1,…
GO:0006412	translation	7.532e-36	5.448e-32	1.09e-32	1.031e-31	146	667	RIDA,RPL29,ABCF1,MARS,RPS6KB1,RPS8,ETF1,MRPL30,IMPACT,RPS23,RPS25,RPS27A,ADAR,WARS2,MRPL35,LRRC47,CNOT6,S100A9,FARSA,XPO5,EIF3L,FECH,EIF3M,SYNCRIP,NSUN4,CNOT11,MRPS28,SLC25A5,SLC25A6,LIN28B,NOA1,SLC25A33,EIF1AD,LARS,MRPL13,MRPL45,APP,TARS2,MAPKAPK5,YARS,IGF2BP1,IGF2BP3,IARS2,MRPL15,MTIF2,COA1,MRPS23,CDK5RAP1,EIF3A,EIF3B,EIF3C,EIF3D,EIF3G,EIF3I,PABPC4,MRPS27,NARS,SSB,STAT3,METAP1,CDC123,EIF2B3,EIF…
GO:0034470	ncRNA processing	3.296e-35	2.384e-31	3.974e-32	3.76e-31	108	399	UBA5,TSR2,RPL29,FBL,MRM1,RPS8,RPS23,RPS25,RPS27A,ADAR,INTS2,UTP15,NSA2,NAF1,RPF2,ELAC1,RPF1,NSUN4,XRN2,TYW3,NOP56,RTCB,LIN28B,NOB1,RPP30,TRMT1,PYURF,CHD7,ERI1,DDX27,DIS3,TRUB2,RRP1,NOP58,TRMT6,NOP14,DIEXF,TSR1,CDK5RAP1,PDCD11,INTS9,WDR12,FTSJ3,UTP6,WBP11,RRP1B,MAK16,NCL,SSB,DUS1L,WDR43,WDR3,DIMT1,MOCS3,RRP36,RRS1,BYSL,UTP20,EBNA1BP2,NOP2,DUS4L,RPP14,DICER1,GRSF1,INTS5,PA2G4,UTP4,PES1,LTV1,DDX21,N…
GO:0043043	peptide biosynthetic process	3.037e-34	2.197e-30	3.138e-31	2.97e-30	147	696	RIDA,RPL29,ABCF1,MARS,RPS6KB1,RPS8,ETF1,MRPL30,IMPACT,RPS23,RPS25,RPS27A,ADAR,WARS2,MRPL35,LRRC47,CNOT6,S100A9,FARSA,XPO5,EIF3L,FECH,EIF3M,SYNCRIP,NSUN4,CNOT11,MRPS28,SLC25A5,SLC25A6,LIN28B,NOA1,SLC25A33,EIF1AD,LARS,MRPL13,MRPL45,APP,TARS2,MAPKAPK5,YARS,IGF2BP1,IGF2BP3,IARS2,MRPL15,MTIF2,COA1,MRPS23,CDK5RAP1,EIF3A,EIF3B,EIF3C,EIF3D,EIF3G,EIF3I,PABPC4,MRPS27,NARS,SSB,STAT3,METAP1,CDC123,EIF2B3,EIF…
GO:0043604	amide biosynthetic process	5.527e-34	3.997e-30	4.997e-31	4.729e-30	157	780	RIDA,RPL29,ABCF1,MARS,RPS6KB1,RPS8,ETF1,MRPL30,IMPACT,RPS23,RPS25,RPS27A,ADAR,WARS2,MRPL35,LRRC47,CNOT6,S100A9,FARSA,XPO5,EIF3L,FECH,EIF3M,NSMAF,SYNCRIP,NSUN4,CNOT11,MRPS28,SLC25A5,SLC25A6,LIN28B,NOA1,SLC25A33,EIF1AD,LARS,MRPL13,ST3GAL2,MRPL45,APP,TARS2,MAPKAPK5,YARS,IGF2BP1,IGF2BP3,IARS2,MRPL15,MTHFD1,MTIF2,ASNS,COA1,MRPS23,CDK5RAP1,EIF3A,EIF3B,ATIC,EIF3C,EIF3D,EIF3G,EIF3I,ST6GALNAC1,PABPC4,MRPS…
GO:0006518	peptide metabolic process	2.619e-32	1.894e-28	2.105e-29	1.992e-28	162	847	RIDA,RPL29,ABCF1,MARS,RPS6KB1,RPS8,ETF1,MRPL30,IMPACT,RPS23,RPS25,RPS27A,ADAR,WARS2,MRPL35,LRRC47,CNOT6,S100A9,FARSA,MGST1,XPO5,EIF3L,FECH,MIPEP,EIF3M,SYNCRIP,NSUN4,CNOT11,MRPS28,SLC25A5,SLC25A6,LIN28B,NOA1,SLC25A33,EIF1AD,LARS,MRPL13,MRPL45,APP,TARS2,MAPKAPK5,YARS,IGF2BP1,IGF2BP3,IARS2,MRPL15,MTIF2,COA1,MRPS23,CDK5RAP1,EIF3A,EIF3B,EIF3C,EIF3D,EIF3G,EIF3I,BECN1,PABPC4,MRPS27,NARS,SSB,STAT3,METAP1…
GO:0043603	cellular amide metabolic process	1.29e-31	9.33e-28	9.33e-29	8.829e-28	181	1023	RIDA,RPL29,ABCF1,MARS,RPS6KB1,RPS8,ETF1,MRPL30,IMPACT,RPS23,RPS25,RPS27A,ADAR,WARS2,MRPL35,LRRC47,CNOT6,S100A9,FARSA,MGST1,XPO5,EIF3L,FECH,MIPEP,EIF3M,NSMAF,SYNCRIP,NSUN4,CNOT11,MRPS28,SLC25A5,SLC25A6,LIN28B,NOA1,SLC25A33,EIF1AD,LARS,MRPL13,ST3GAL2,MRPL45,APP,TARS2,MAPKAPK5,YARS,IGF2BP1,IGF2BP3,IARS2,MRPL15,MTHFD1,ASAH1,MTIF2,ASNS,COA1,MRPS23,MTR,CDK5RAP1,EIF3A,EIF3B,ATIC,EIF3C,EIF3D,EIF3G,EIF3I,…
GO:0016072	rRNA metabolic process	1.384e-29	1.001e-25	9.099e-27	8.611e-26	80	267	TSR2,RPL29,FBL,MRM1,RPS8,RPS23,RPS25,RPS27A,UTP15,NSA2,NAF1,RPF2,RPF1,NSUN4,XRN2,NOP56,NOB1,RPP30,PYURF,CHD7,ERI1,DDX27,DIS3,RRP1,NIFK,NOP58,NOP14,DIEXF,TSR1,PDCD11,WDR12,FTSJ3,UTP6,WBP11,RRP1B,MAK16,NCL,WDR43,WDR3,DIMT1,RRP36,RRS1,BYSL,UTP20,EBNA1BP2,NOP2,RPP14,DICER1,PA2G4,UTP4,PES1,LTV1,DDX21,NOLC1,GTPBP4,EXOSC8,MRM2,EXOSC9,WDR36,NOL11,MRPS9,RSL1D1,NOL6,BMS1,PNO1,DKC1,RIOK1,EXOSC3,HEATR1,NOL9,…
GO:0006364	rRNA processing	6.528e-29	4.722e-25	3.935e-26	3.724e-25	78	260	TSR2,RPL29,FBL,MRM1,RPS8,RPS23,RPS25,RPS27A,UTP15,NSA2,NAF1,RPF2,RPF1,NSUN4,XRN2,NOP56,NOB1,RPP30,PYURF,CHD7,ERI1,DDX27,DIS3,RRP1,NOP58,NOP14,DIEXF,TSR1,PDCD11,WDR12,FTSJ3,UTP6,WBP11,RRP1B,MAK16,NCL,WDR43,WDR3,DIMT1,RRP36,RRS1,BYSL,UTP20,EBNA1BP2,NOP2,RPP14,PA2G4,UTP4,PES1,LTV1,DDX21,NOLC1,GTPBP4,EXOSC8,MRM2,EXOSC9,WDR36,NOL11,MRPS9,RSL1D1,NOL6,BMS1,PNO1,DKC1,RIOK1,EXOSC3,HEATR1,NOL9,SHQ1,FCF1,UT…
GO:1901566	organonitrogen compound biosynthetic process	9.737e-27	7.043e-23	5.417e-24	5.127e-23	215	1444	GPHN,RIDA,RPL29,ABAT,ABCF1,ACADM,MARS,RPS6KB1,RPS8,ETF1,MRPL30,IMPACT,RPS23,RPS25,RPS27A,ADAR,WARS2,ADCY7,MRPL35,LRRC47,CNOT6,S100A9,FARSA,MGST1,XPO5,EIF3L,FECH,AHCY,ALDOA,EIF3M,NSMAF,SYNCRIP,NSUN4,CNOT11,MRPS28,SLC25A5,SLC25A6,LIN28B,NOA1,SLC25A33,EIF1AD,LARS,MRPL13,ST3GAL2,MRPL45,APP,TARS2,MAPKAPK5,PAICS,YARS,IGF2BP1,IGF2BP3,IARS2,MRPL15,MTHFD1,MTIF2,ASNS,COA1,MRPS23,MTR,CDK5RAP1,EIF3A,EIF3B,AT…
GO:0010608	posttranscriptional regulation of gene expression	4.48e-25	3.24e-21	2.315e-22	2.191e-21	103	475	RIDA,ABCF1,RPS6KB1,ETF1,IMPACT,RPS27A,ADAR,CNOT6,S100A9,XPO5,EIF3L,FECH,EIF3M,SYNCRIP,NSUN4,CNOT11,LIN28B,LARS,EPB41L5,APEX1,APP,MAPKAPK5,DIS3,IGF2BP1,IGF2BP3,IARS2,MTIF2,CDK5RAP1,EIF3A,EIF3B,EIF3C,EIF3D,EIF3G,EIF3I,PABPC4,STAT3,METAP1,PSME4,CDC123,EIF2B3,EIF2B5,C1QBP,HNRNPA0,GCN1,LARP1,GATC,DICER1,CDC37,THBS1,CNOT9,PA2G4,PPP1R15B,CDK4,EXOSC8,CIRBP,GUF1,VARS,EXOSC9,PSMF1,EIF4H,POLR2D,MRPL58,MAPK1…
GO:0007005	mitochondrion organization	6.044e-22	4.372e-18	2.914e-19	2.758e-18	132	767	CHAF1B,APOOL,LRRK2,MRPL30,OBSCN,TIMMDC1,TOMM5,KRCC1,MRPL35,MIPEP,PARL,SCO1,TOMM40,MMP9,TIMM44,MPV17,NSUN4,MRPS28,SLC25A5,SLC25A6,NOA1,SLC25A33,ANXA5,MRPL13,ZCCHC17,MRPL45,TARS2,THEM4,RUVBL1,MRPL15,TIMM21,MTERF2,MTIF2,TIMM50,COA1,MRPS23,CDK5RAP1,ATP1B1,BECN1,SNRPD1,SNRPF,GABPA,MYC,WBP11,TMEM126B,MRPS27,NDUFA1,NDUFA9,NDUFAB1,NDUFB5,NDUFS1,STAT3,PMPCA,SUPV3L1,AFG3L2,C1QBP,NMT1,CLUH,PIM2,GATC,COX18,T…
GO:0022618	ribonucleoprotein complex assembly	1.524e-21	1.102e-17	6.89e-19	6.521e-18	60	208	RPS25,ADAR,NUFIP1,CNOT6,PRMT5,EIF3L,RPF2,EIF3M,RPF1,NSUN4,RBM22,TSR1,SMN2,EIF3A,EIF3B,EIF3C,EIF3D,USP39,EIF3G,EIF3I,SNRPC,SNRPD1,SNRPF,ATR,SRPK2,CDC123,SF3A3,C1QBP,PRPF19,DICER1,ATXN2L,CIRBP,CLNS1A,WDR77,EIF4H,POLR2D,GEMIN5,SF1,ZNHIT6,LSM14A,MRPL11,PRPF31,BMS1,EIF3E,DDX3X,ERAL1,FAM103A1,PIH1D1,PRPF39,MRPL20,SHQ1,MRPS7,GEMIN7,EIF2D,EIF2S3,OGFOD1,MRTO4,EIF2A,RSL24D1,RPL12
GO:0071826	ribonucleoprotein complex subunit organization	3.915e-21	2.832e-17	1.666e-18	1.576e-17	61	218	RPS25,ADAR,NUFIP1,CNOT6,PRMT5,EIF3L,RPF2,EIF3M,RPF1,NSUN4,RBM22,TSR1,MTIF2,SMN2,EIF3A,EIF3B,EIF3C,EIF3D,USP39,EIF3G,EIF3I,SNRPC,SNRPD1,SNRPF,ATR,SRPK2,CDC123,SF3A3,C1QBP,PRPF19,DICER1,ATXN2L,CIRBP,CLNS1A,WDR77,EIF4H,POLR2D,GEMIN5,SF1,ZNHIT6,LSM14A,MRPL11,PRPF31,BMS1,EIF3E,DDX3X,ERAL1,FAM103A1,PIH1D1,PRPF39,MRPL20,SHQ1,MRPS7,GEMIN7,EIF2D,EIF2S3,OGFOD1,MRTO4,EIF2A,RSL24D1,RPL12
GO:0006399	tRNA metabolic process	2.193e-20	1.586e-16	8.814e-18	8.341e-17	54	180	UBA5,FBL,MARS,WARS2,LRRC47,FARSA,ELAC1,NSUN4,TYW3,RTCB,RPP30,LARS,TRMT1,PYURF,TARS2,TRUB2,YARS,IARS2,TRMT6,CDK5RAP1,NARS,SSB,DUS1L,MOCS3,MARS2,DUS4L,GATC,RPP14,GRSF1,MRPL39,GTF3C1,GTF3C2,GATB,EXOSC8,ELAC2,MTO1,VARS,PUS7,EXOSC9,PPA1,TRIT1,FTSJ1,DARS,NSUN2,KARS,THG1L,TRMT61B,TSEN15,EXOSC3,ELP3,GTF3C6,DARS2,NAT10,QRSL1
GO:0032543	mitochondrial translation	8.397e-20	6.074e-16	3.197e-17	3.025e-16	43	120	MRPL30,MRPL35,NSUN4,MRPS28,NOA1,MRPL13,MRPL45,TARS2,MRPL15,MTIF2,MRPS23,CDK5RAP1,MRPS27,C1QBP,GATC,MRPL39,MRPL3,GATB,MRPS35,TUFM,MRPS21,MRPL50,MRPL58,MRPS15,MRPS9,MRPS5,MRPL40,MRPL32,GFM1,MRPL11,MRPL9,MRPL16,CHCHD1,MRPL20,MRPL47,MRPL53,MRPS16,DARS2,MRPL2,MRPS7,LRPPRC,MRPL46,QRSL1
GO:0006417	regulation of translation	2.603e-17	1.883e-13	9.414e-15	8.909e-14	73	347	RIDA,ABCF1,RPS6KB1,ETF1,IMPACT,ADAR,CNOT6,S100A9,XPO5,EIF3L,FECH,EIF3M,SYNCRIP,NSUN4,CNOT11,LIN28B,LARS,APP,MAPKAPK5,IGF2BP1,IGF2BP3,IARS2,MTIF2,CDK5RAP1,EIF3A,EIF3B,EIF3C,EIF3D,EIF3G,EIF3I,STAT3,METAP1,CDC123,EIF2B3,EIF2B5,C1QBP,GCN1,LARP1,GATC,DICER1,THBS1,CNOT9,PA2G4,PPP1R15B,CDK4,CIRBP,GUF1,VARS,EIF4H,POLR2D,MRPL58,PRKCA,LSM14A,PUM1,ILF3,EIF3E,PAIP2B,IREB2,PTBP1,DDX3X,PUM3,RAN,RBM3,UPF1,LRPPR…
GO:0070125	mitochondrial translational elongation	8.293e-16	5.998e-12	2.856e-13	2.703e-12	32	85	MRPL30,MRPL35,MRPS28,MRPL13,MRPL45,MRPL15,MRPS23,MRPS27,MRPL39,MRPL3,MRPS35,TUFM,MRPS21,MRPL50,MRPL58,MRPS15,MRPS9,MRPS5,MRPL40,MRPL32,GFM1,MRPL11,MRPL9,MRPL16,CHCHD1,MRPL20,MRPL47,MRPL53,MRPS16,MRPL2,MRPS7,MRPL46
GO:0034248	regulation of cellular amide metabolic process	1.288e-15	9.313e-12	4.233e-13	4.006e-12	74	380	RIDA,ABCF1,RPS6KB1,ETF1,IMPACT,ADAR,CNOT6,S100A9,XPO5,EIF3L,FECH,EIF3M,NSMAF,SYNCRIP,NSUN4,CNOT11,LIN28B,LARS,APP,MAPKAPK5,IGF2BP1,IGF2BP3,IARS2,MTIF2,CDK5RAP1,EIF3A,EIF3B,EIF3C,EIF3D,EIF3G,EIF3I,STAT3,METAP1,CDC123,EIF2B3,EIF2B5,C1QBP,GCN1,LARP1,GATC,DICER1,THBS1,CNOT9,PA2G4,PPP1R15B,CDK4,CIRBP,GUF1,VARS,EIF4H,POLR2D,MRPL58,PRKCA,LSM14A,PUM1,ILF3,EIF3E,PAIP2B,IREB2,PTBP1,DDX3X,PUM3,RAN,RBM3,UPF1…
GO:0006415	translational termination	2.652e-15	1.918e-11	8.339e-13	7.892e-12	34	99	RIDA,ETF1,MRPL30,MRPL35,MRPS28,MRPL13,MRPL45,MRPL15,MRPS23,MRPS27,MRPL39,MRPL3,MRPS35,MRPS21,MRPL50,MRPL58,MRPS15,MRPS9,MRPS5,MRPL40,MRPL32,MRPL11,MRPL9,MRPL16,CHCHD1,MRPL20,MRPL47,MRPL53,MRPS16,UPF1,MRPL2,MRPS7,OGFOD1,MRPL46
GO:0006414	translational elongation	1.29e-14	9.334e-11	3.889e-12	3.681e-11	39	134	MRPL30,MRPL35,MRPS28,LARS,MRPL13,MRPL45,IARS2,MRPL15,MRPS23,CDK5RAP1,MRPS27,GATC,MRPL39,MRPL3,MRPS35,TUFM,MRPS21,EEF2K,VARS,MRPL50,MRPL58,MRPS15,MRPS9,MRPS5,MRPL40,MRPL32,GFM1,MRPL11,MRPL9,MRPL16,CHCHD1,MRPL20,MRPL47,MRPL53,MRPS16,MRPL2,MRPS7,EEF2,MRPL46
GO:0009451	RNA modification	4.513e-14	3.264e-10	1.306e-11	1.236e-10	37	126	UBA5,FBL,MRM1,ADAR,NAF1,SYNCRIP,NSUN4,NOP56,TRMT1,PYURF,TRUB2,NOP58,TRMT6,CDK5RAP1,FTSJ3,DNAJB11,RNMT,CMTR1,SSB,DUS1L,DIMT1,MOCS3,DUS4L,MTO1,PUS7,MRM2,BAG4,VIRMA,TRIT1,FTSJ1,NSUN2,THG1L,DKC1,TRMT61B,ELP3,NAT10,ALKBH3
GO:0070126	mitochondrial translational termination	7.131e-14	5.158e-10	1.984e-11	1.877e-10	30	86	MRPL30,MRPL35,MRPS28,MRPL13,MRPL45,MRPL15,MRPS23,MRPS27,MRPL39,MRPL3,MRPS35,MRPS21,MRPL50,MRPL58,MRPS15,MRPS9,MRPS5,MRPL40,MRPL32,MRPL11,MRPL9,MRPL16,CHCHD1,MRPL20,MRPL47,MRPL53,MRPS16,MRPL2,MRPS7,MRPL46
GO:0065003	macromolecular complex assembly	8.096e-14	5.856e-10	2.169e-11	2.052e-10	213	1825	CLPP,GPHN,MKKS,CHAF1B,ERCC4,ACADM,MAX,LRRK2,IMPACT,MCM2,RPS25,RPS27A,TIMMDC1,ADAR,NUFIP1,CNOT6,KCTD6,MGST1,PRMT5,EIF3L,RPF2,FECH,SCO1,AIF1,MMP9,FH,ALDOA,EIF3M,UQCRHL,LCMT1,CUL4B,RPF1,NSUN4,SGK1,SLC25A33,ANXA5,CCT2,APP,SKIL,MSN,NIFK,RBM22,NDC1,RUVBL1,TIMM21,HAUS1,TSR1,PSMG1,COA1,CCT8,CENPV,SMN2,EIF3A,EIF3B,EIF3C,EIF3D,USP39,EIF3G,EIF3I,SNRPC,SNRPD1,SNRPF,TRAPPC2L,SOAT1,MYC,ATR,NCKAP1,IQGAP2,SEC24A…
GO:0016071	mRNA metabolic process	8.508e-14	6.154e-10	2.198e-11	2.08e-10	102	664	RPL29,ZNF326,SF3B4,SMNDC1,BCAS2,RPS8,ETF1,RPS23,RPS25,RPS27A,ADAR,SCAF4,CNOT6,SAFB,PRMT5,SYNCRIP,CNOT11,XRN2,DCPS,ERI1,APP,DIS3,THOC5,RBM22,SNRNP48,PPP4R2,RBMX2,PPIL1,PDCD11,SMN2,DHX32,FUS,USP39,SNRPA,SNRPC,SNRPD1,CPSF3,SNRPF,SNRPN,DNAJB11,AHCYL1,WBP11,RNMT,CMTR1,HNRNPM,SRPK1,SRPK2,SSB,RNPS1,SUPT6H,SUPV3L1,ZPR1,SF3A3,C1QBP,HNRNPA0,PRPF19,CPSF2,NONO,GRSF1,GTF2H1,PDE12,SF3B3,CNOT9,PRPF4,WBP4,U2AF2,…
GO:0006520	cellular amino acid metabolic process	7.681e-13	5.556e-09	1.916e-10	1.813e-09	71	402	ABAT,MARS,WARS2,LRRC47,FAH,FARSA,AHCY,LARS,TARS2,YARS,IARS2,MTHFD1,ASNS,MTR,ATIC,AHCYL1,NARS,BCAT1,BCKDHB,PSME4,GLS,GOT1,GOT2,MARS2,GATC,OAT,NFS1,SLC7A6,CBS,MRPL39,KYAT3,CARNMT1,PARK7,PEPD,GATB,PFAS,ENOPH1,TXNRD1,TYMS,SLC25A32,CTPS2,PYCR2,VARS,ASNSD1,PSAT1,PSMF1,MTHFD1L,PPA1,PPAT,CTH,CTPS1,PSMA1,PSMA2,PSMA6,PSMB2,PSMB5,PSMB7,PSMC4,PSMC5,PSMD3,DARS,PSMD7,PSMD11,PSME2,PHGDH,KARS,DHPS,DARS2,EIF2B1,P…
GO:0034622	cellular macromolecular complex assembly	2.219e-12	1.605e-08	5.35e-10	5.063e-09	131	991	MKKS,CHAF1B,MCM2,RPS25,RPS27A,TIMMDC1,ADAR,NUFIP1,CNOT6,PRMT5,EIF3L,RPF2,SCO1,AIF1,EIF3M,CUL4B,RPF1,NSUN4,SGK1,SLC25A33,CCT2,RBM22,NDC1,RUVBL1,TIMM21,TSR1,PSMG1,COA1,CENPV,SMN2,EIF3A,EIF3B,EIF3C,EIF3D,USP39,EIF3G,EIF3I,SNRPC,SNRPD1,SNRPF,ATR,NCKAP1,IQGAP2,TMEM126B,SNAP23,SRPK2,NDUFA1,TUBGCP2,TUBGCP4,NDUFA9,NDUFAB1,NDUFB5,NDUFS1,NUP205,CDC123,VAMP7,SF3A3,C1QBP,PRPF19,TBCE,TCP1,GRB2,COX18,TFAM,DICE…
GO:0006403	RNA localization	2.568e-12	1.857e-08	5.992e-10	5.67e-09	47	214	SEH1L,FBL,XPO5,NAF1,CCT7,CCT4,CCT2,THOC5,IGF2BP1,NOP58,IGF2BP3,NDC1,RUVBL1,CCT5,RBMX2,NUP133,CCT8,CPSF3,ATR,RUVBL2,NUP205,RNPS1,SUPT6H,CPSF2,RGPD2,TCP1,DDX19B,CCT3,U2AF2,PNPT1,AGFG1,AHCTF1,POLR2D,ZNHIT6,NUP93,PRPF31,NOL6,DKC1,SLBP,PIH1D1,RAN,EXOSC3,UPF1,SHQ1,LRPPRC,SENP2,DDX39A
GO:0042274	ribosomal small subunit biogenesis	5.466e-12	3.954e-08	1.236e-09	1.169e-08	24	65	TSR2,RPS8,RPS25,NOB1,NOP14,DIEXF,TSR1,UTP6,WDR3,RRP36,RRS1,BYSL,UTP20,NOM1,UTP4,NOL11,MRPS9,BMS1,ERAL1,HEATR1,FCF1,MRPS7,UTP18,UTP11
GO:1904872	regulation of telomerase RNA localization to Cajal body	6.026e-12	4.359e-08	1.282e-09	1.213e-08	12	15	NAF1,CCT7,CCT4,CCT2,RUVBL1,CCT5,CCT8,RUVBL2,TCP1,CCT3,DKC1,SHQ1
GO:1904874	positive regulation of telomerase RNA localization to Cajal body	6.026e-12	4.359e-08	1.282e-09	1.213e-08	12	15	NAF1,CCT7,CCT4,CCT2,RUVBL1,CCT5,CCT8,RUVBL2,TCP1,CCT3,DKC1,SHQ1
GO:0043487	regulation of RNA stability	9.794e-12	7.084e-08	2.024e-09	1.915e-08	37	148	RPS27A,SYNCRIP,APEX1,DIS3,IGF2BP1,PABPC4,PSME4,HNRNPA0,DICER1,EXOSC8,CIRBP,EXOSC9,PSMF1,MAPK14,PRKCA,PUM1,SERBP1,PSMA1,PSMA2,PSMA6,PSMB2,PSMB5,PSMB7,PSMC4,PSMC5,PSMD3,PSMD7,PSMD11,PSME2,PTBP1,DKC1,THRAP3,TNPO1,EXOSC3,UPF1,PSME3,HNRNPR
GO:0043488	regulation of mRNA stability	1.863e-11	1.348e-07	3.744e-09	3.543e-08	36	144	RPS27A,SYNCRIP,APEX1,DIS3,IGF2BP1,PABPC4,PSME4,HNRNPA0,DICER1,EXOSC8,CIRBP,EXOSC9,PSMF1,MAPK14,PRKCA,PUM1,SERBP1,PSMA1,PSMA2,PSMA6,PSMB2,PSMB5,PSMB7,PSMC4,PSMC5,PSMD3,PSMD7,PSMD11,PSME2,PTBP1,THRAP3,TNPO1,EXOSC3,UPF1,PSME3,HNRNPR
GO:0090672	telomerase RNA localization	2.253e-11	1.63e-07	4.179e-09	3.955e-08	12	16	NAF1,CCT7,CCT4,CCT2,RUVBL1,CCT5,CCT8,RUVBL2,TCP1,CCT3,DKC1,SHQ1
GO:0090671	telomerase RNA localization to Cajal body	2.253e-11	1.63e-07	4.179e-09	3.955e-08	12	16	NAF1,CCT7,CCT4,CCT2,RUVBL1,CCT5,CCT8,RUVBL2,TCP1,CCT3,DKC1,SHQ1
GO:0090670	RNA localization to Cajal body	2.253e-11	1.63e-07	4.179e-09	3.955e-08	12	16	NAF1,CCT7,CCT4,CCT2,RUVBL1,CCT5,CCT8,RUVBL2,TCP1,CCT3,DKC1,SHQ1
GO:0006397	mRNA processing	2.895e-11	2.094e-07	5.235e-09	4.955e-08	76	479	ZNF326,SF3B4,SMNDC1,BCAS2,ADAR,SCAF4,SAFB,PRMT5,SYNCRIP,XRN2,DCPS,APP,THOC5,RBM22,SNRNP48,PPP4R2,RBMX2,PPIL1,PDCD11,SMN2,DHX32,FUS,USP39,SNRPA,SNRPC,SNRPD1,CPSF3,SNRPF,SNRPN,AHCYL1,WBP11,RNMT,CMTR1,HNRNPM,SRPK1,SRPK2,RNPS1,SUPT6H,ZPR1,SF3A3,C1QBP,HNRNPA0,PRPF19,CPSF2,NONO,GRSF1,GTF2H1,PDE12,SF3B3,PRPF4,WBP4,U2AF2,HNRNPF,EFTUD2,PNPT1,RBM27,CLNS1A,WDR77,POLR2D,GEMIN5,VIRMA,SF1,CTR9,PRPF31,PTBP1,DHX…
GO:0030490	maturation of SSU-rRNA	5.671e-11	4.102e-07	1e-08	9.468e-08	19	45	TSR2,RPS8,NOB1,NOP14,DIEXF,TSR1,UTP6,WDR3,RRP36,RRS1,BYSL,UTP20,UTP4,NOL11,MRPS9,BMS1,HEATR1,FCF1,UTP18
GO:0000460	maturation of 5.8S rRNA	8.064e-11	5.832e-07	1.389e-08	1.314e-07	16	32	NSA2,RPF1,ERI1,NOP14,WDR12,FTSJ3,MAK16,RRS1,UTP20,PES1,EXOSC8,EXOSC9,EXOSC3,NOL9,FCF1,LAS1L
GO:0072594	establishment of protein localization to organelle	1.07e-10	7.739e-07	1.8e-08	1.703e-07	95	676	RPL29,RPS8,LRRK2,RPS23,RPS25,RPS27A,TOMM5,ADAR,PIK3R4,MIPEP,PARL,TOMM40,TIMM44,IPO8,IPO7,SLC25A6,CCT7,CCT4,CCT2,TRAPPC8,AP3M1,RBM22,NOP58,RUVBL1,TIMM21,CCT5,TIMM50,NUP133,CCT8,BECN1,MBTPS1,WBP11,SRP19,SRP68,SRP72,RUVBL2,STAT3,NUP205,PMPCA,ZPR1,AFG3L2,VAMP7,NMT1,RGPD2,NRAS,TCP1,COX18,CBLB,GSK3B,POLR3A,TGFBR1,THRA,PDCD5,PRDX1,TNPO3,DDX58,PHB2,PEX12,U2AF2,KPNA6,TXN,PIK3R1,NABP2,UGCG,HSPA4,PMAIP1,HSP…
GO:0000469	cleavage involved in rRNA processing	1.704e-10	1.233e-06	2.801e-08	2.651e-07	14	25	NOB1,ERI1,NOP14,TSR1,RRP36,RRS1,UTP20,EXOSC8,EXOSC9,BMS1,EXOSC3,NOL9,FCF1,LAS1L
GO:0006413	translational initiation	2.247e-10	1.625e-06	3.611e-08	3.418e-07	41	194	RPL29,ABCF1,RPS6KB1,RPS8,IMPACT,RPS23,RPS25,RPS27A,EIF3L,FECH,EIF3M,EIF1AD,MTIF2,EIF3A,EIF3B,EIF3C,EIF3D,EIF3G,EIF3I,SSB,CDC123,EIF2B3,EIF2B5,EIF2S2,LARP1,PPP1R15B,EIF4H,POLR2D,EIF3E,PAIP2B,PTBP1,DDX3X,EIF2D,EIF1AX,EIF2B1,EIF2S3,EIF4EBP2,EIF2AK4,EIF2A,RPL9,RPL12
GO:0000462	maturation of SSU-rRNA from tricistronic rRNA transcript (SSU-rRNA, 5.8S rRNA, LSU-rRNA)	4.437e-10	3.21e-06	6.977e-08	6.603e-07	16	35	TSR2,RPS8,NOP14,DIEXF,TSR1,UTP6,WDR3,RRP36,RRS1,BYSL,UTP20,MRPS9,BMS1,HEATR1,FCF1,UTP18
GO:0008033	tRNA processing	5.691e-10	4.117e-06	8.759e-08	8.289e-07	30	118	UBA5,FBL,ELAC1,NSUN4,TYW3,RTCB,RPP30,TRMT1,PYURF,TRUB2,TRMT6,CDK5RAP1,SSB,DUS1L,MOCS3,DUS4L,RPP14,GRSF1,ELAC2,MTO1,PUS7,TRIT1,FTSJ1,NSUN2,KARS,THG1L,TRMT61B,TSEN15,ELP3,NAT10
GO:0000278	mitotic cell cycle	8.283e-10	5.991e-06	1.227e-07	1.161e-06	125	1016	SEH1L,MCMBP,RPS6KB1,MCM2,MCM3,SKA2,MCM6,MCM7,CEP76,RPS27A,MCM10,RAB8A,CNOT6,PRMT5,AIF1,ANAPC5,LCMT1,CUL4B,CUL2,CUL1,CNOT11,APEX1,APP,SKP2,MAPRE3,NDC1,GTPBP8,RUVBL1,HAUS1,INTS13,ASNS,NUP133,CENPV,GINS2,BECN1,NUDC,CDC23,MYC,MYH10,STK26,BACH1,BCAT1,NBN,TUBGCP2,TUBGCP4,RCC2,WDR43,NUP205,NEK2,NEK3,PSME4,CDC123,RRS1,ZPR1,TIMELESS,BTRC,USP22,PIM2,KATNA1,CCNF,CCNG1,CCNG2,CNOT9,PEBP1,CHEK2,CDC6,CDC25A,CDK…
GO:0007049	cell cycle	8.313e-10	6.012e-06	1.227e-07	1.161e-06	192	1766	RIDA,SEH1L,CHAF1B,MCMBP,ERCC4,MNS1,RPS6KB1,MCM2,MCM3,SKA2,MCM6,MCM7,CEP76,RPS27A,MCM10,RAB8A,CNOT6,PIK3R4,CITED2,ABRAXAS1,PRMT5,AIF1,ANAPC5,LCMT1,CUL4B,CUL2,CUL1,CNOT11,SGK1,USP28,SLC25A33,APEX1,ICK,APP,FANCM,SKIL,SKP2,THOC5,GAS2L1,MAPRE3,NDC1,GTPBP8,RUVBL1,HAUS1,INTS13,ASNS,NUP133,CDK5RAP1,CENPV,GINS2,USP39,PRR11,CCNB1IP1,BECN1,NUDC,TXLNG,CDC23,MYC,MYH10,ATR,BEX1,STK26,BACH1,MEIOB,BCAT1,NBN,SRPK…
GO:0044403	symbiont process	1.042e-09	7.539e-06	1.478e-07	1.399e-06	105	808	SEH1L,RPL29,RPS8,ETF1,RTN3,RPS23,RPS25,RPS27A,ADAR,EIF3L,CCL2,MMP9,SYNCRIP,MPO,CUL2,CUL1,IPO7,SLC25A5,SLC25A6,HACD3,NELFCD,SGTA,MON1B,THOC5,ATP6V1H,THEM4,NDC1,TBK1,NUP133,EIF3A,EIF3B,FUCA2,EIF3D,EIF3G,BECN1,MYC,NCKAP1,NBN,SRPK1,SRPK2,SSB,STAT3,NUP205,SUPT4H1,SUPT6H,C1QBP,APOBEC3C,TAF5,COPS6,BTRC,TCP1,GRB2,LARP1,DICER1,MSH6,OSBP,XPR1,DDX58,CHD1,HMGA1,PFN1,TYMS,RAB9A,UBE3A,KCTD5,PIK3R1,VDAC1,HSP90A…
GO:0044419	interspecies interaction between organisms	1.042e-09	7.539e-06	1.478e-07	1.399e-06	105	808	SEH1L,RPL29,RPS8,ETF1,RTN3,RPS23,RPS25,RPS27A,ADAR,EIF3L,CCL2,MMP9,SYNCRIP,MPO,CUL2,CUL1,IPO7,SLC25A5,SLC25A6,HACD3,NELFCD,SGTA,MON1B,THOC5,ATP6V1H,THEM4,NDC1,TBK1,NUP133,EIF3A,EIF3B,FUCA2,EIF3D,EIF3G,BECN1,MYC,NCKAP1,NBN,SRPK1,SRPK2,SSB,STAT3,NUP205,SUPT4H1,SUPT6H,C1QBP,APOBEC3C,TAF5,COPS6,BTRC,TCP1,GRB2,LARP1,DICER1,MSH6,OSBP,XPR1,DDX58,CHD1,HMGA1,PFN1,TYMS,RAB9A,UBE3A,KCTD5,PIK3R1,VDAC1,HSP90A…
GO:0043039	tRNA aminoacylation	1.097e-09	7.937e-06	1.526e-07	1.445e-06	19	52	MARS,WARS2,LRRC47,FARSA,LARS,TARS2,YARS,IARS2,NARS,MARS2,GATC,MRPL39,GATB,VARS,PPA1,DARS,KARS,DARS2,QRSL1
GO:0033365	protein localization to organelle	1.54e-09	1.114e-05	2.101e-07	1.989e-06	115	919	RPL29,RPS8,LRRK2,OBSCN,RPS23,RPS25,RPS27A,TOMM5,ADAR,PIK3R4,MIPEP,PARL,TOMM40,TIMM44,IPO8,IPO7,SLC25A6,CCT7,CCT4,CCT2,TRAPPC8,AP3M1,MSN,RBM22,NOP58,RUVBL1,TIMM21,CCT5,INTS13,TIMM50,NUP133,CCT8,BECN1,MBTPS1,WBP11,ATR,HNRNPM,SRP19,SRP68,SRP72,SSB,RUVBL2,RCC2,STAT3,NUP205,TAF8,PMPCA,ZPR1,AFG3L2,VAMP7,NMT1,AP3D1,RGPD2,NRAS,TCP1,COX18,CBLB,TERF2,GSK3B,POLR3A,TGFBR1,THRA,PDCD5,PES1,PRDX1,TNPO3,DDX58,CC…
GO:0043038	amino acid activation	1.597e-09	1.155e-05	2.122e-07	2.008e-06	19	53	MARS,WARS2,LRRC47,FARSA,LARS,TARS2,YARS,IARS2,NARS,MARS2,GATC,MRPL39,GATB,VARS,PPA1,DARS,KARS,DARS2,QRSL1
GO:0090501	RNA phosphodiester bond hydrolysis	1.627e-09	1.176e-05	2.122e-07	2.008e-06	31	130	RIDA,CNOT6,ELAC1,XRN2,DCPS,NOB1,RPP30,APEX1,ERI1,DIS3,NOP14,TSR1,CPSF3,RRP36,RRS1,UTP20,CPSF2,RPP14,DICER1,PDE12,EXOSC8,ELAC2,PNPT1,EXOSC9,BMS1,TSEN15,EXOSC3,NOL9,FCF1,ISG20L2,LAS1L
GO:0044764	multi-organism cellular process	1.643e-09	1.188e-05	2.122e-07	2.008e-06	101	773	SEH1L,RPL29,RPS8,ETF1,RTN3,RPS23,RPS25,RPS27A,ADAR,EIF3L,CCL2,MMP9,SYNCRIP,CUL2,CUL1,IPO7,SLC25A5,SLC25A6,HACD3,NELFCD,SGTA,MON1B,THOC5,ATP6V1H,THEM4,NDC1,TBK1,NUP133,EIF3A,EIF3B,EIF3D,EIF3G,BECN1,MYC,NCKAP1,NBN,SRPK1,SRPK2,SSB,STAT3,NUP205,SUPT4H1,SUPT6H,C1QBP,APOBEC3C,TAF5,COPS6,BTRC,GRB2,LARP1,DICER1,MSH6,XPR1,DDX58,CHD1,HMGA1,PFN1,TYMS,UBE3A,KCTD5,PIK3R1,VDAC1,HSP90AB1,APOBEC3D,DERL1,EIF4H,PO…
GO:1903047	mitotic cell cycle process	1.679e-09	1.214e-05	2.131e-07	2.016e-06	116	931	SEH1L,MCMBP,RPS6KB1,MCM2,MCM3,SKA2,MCM6,MCM7,CEP76,RPS27A,MCM10,RAB8A,CNOT6,PRMT5,AIF1,ANAPC5,LCMT1,CUL4B,CUL2,CUL1,CNOT11,APEX1,APP,SKP2,MAPRE3,NDC1,GTPBP8,RUVBL1,HAUS1,INTS13,NUP133,CENPV,GINS2,BECN1,NUDC,CDC23,MYH10,BACH1,BCAT1,NBN,TUBGCP2,TUBGCP4,RCC2,WDR43,NUP205,NEK2,NEK3,PSME4,RRS1,ZPR1,TIMELESS,BTRC,PIM2,KATNA1,CCNF,CCNG1,CCNG2,CNOT9,PEBP1,CHEK2,CDC6,CDC25A,CDK4,NOLC1,ORC6,PHB2,TYMS,ANAPC…
GO:0042273	ribosomal large subunit biogenesis	1.857e-09	1.343e-05	2.316e-07	2.192e-06	20	59	NSA2,RPF2,RPF1,NOP16,WDR12,FTSJ3,MAK16,RRS1,EBNA1BP2,PES1,GTPBP4,MRPL11,RSL1D1,MRPL20,NOL9,SDAD1,MRTO4,LAS1L,RSL24D1,RPL12
GO:0022402	cell cycle process	2.078e-09	1.503e-05	2.547e-07	2.41e-06	157	1385	RIDA,SEH1L,MCMBP,ERCC4,RPS6KB1,MCM2,MCM3,SKA2,MCM6,MCM7,CEP76,RPS27A,MCM10,RAB8A,CNOT6,PIK3R4,ABRAXAS1,PRMT5,AIF1,ANAPC5,LCMT1,CUL4B,CUL2,CUL1,CNOT11,USP28,SLC25A33,APEX1,APP,FANCM,SKIL,SKP2,THOC5,GAS2L1,MAPRE3,NDC1,GTPBP8,RUVBL1,HAUS1,INTS13,NUP133,CENPV,GINS2,CCNB1IP1,BECN1,NUDC,TXLNG,CDC23,MYC,MYH10,ATR,BACH1,MEIOB,BCAT1,NBN,TUBGCP2,TUBGCP4,RCC2,WDR43,NUP205,NEK2,NEK3,PSME4,CDC123,RRS1,ZPR1,PR…
GO:0000466	maturation of 5.8S rRNA from tricistronic rRNA transcript (SSU-rRNA, 5.8S rRNA, LSU-rRNA)	2.6e-09	1.881e-05	3.121e-07	2.954e-06	12	21	ERI1,NOP14,WDR12,FTSJ3,RRS1,UTP20,PES1,EXOSC8,EXOSC9,EXOSC3,NOL9,FCF1
GO:0016032	viral process	2.632e-09	1.904e-05	3.121e-07	2.954e-06	99	759	SEH1L,RPL29,RPS8,ETF1,RTN3,RPS23,RPS25,RPS27A,ADAR,EIF3L,CCL2,MMP9,SYNCRIP,CUL2,CUL1,IPO7,SLC25A5,SLC25A6,HACD3,NELFCD,SGTA,MON1B,THOC5,ATP6V1H,THEM4,NDC1,TBK1,NUP133,EIF3A,EIF3B,EIF3D,EIF3G,BECN1,MYC,NCKAP1,NBN,SRPK1,SRPK2,SSB,STAT3,NUP205,SUPT4H1,SUPT6H,C1QBP,APOBEC3C,TAF5,COPS6,BTRC,GRB2,LARP1,DICER1,MSH6,XPR1,DDX58,CHD1,HMGA1,PFN1,TYMS,UBE3A,KCTD5,PIK3R1,VDAC1,HSP90AB1,APOBEC3D,DERL1,EIF4H,PO…
GO:0019752	carboxylic acid metabolic process	2.688e-09	1.945e-05	3.136e-07	2.968e-06	122	1003	ABAT,ACADM,MARS,ACLY,ACO2,ACOX1,MDH2,ME2,WARS2,LRRC47,FAH,FARSA,ACSM3,AHCY,LYPLA1,FH,ALDOA,SDHD,MPI,HACD3,LARS,TARS2,MORC2,YARS,IARS2,THEM4,SLC16A1,MTHFD1,ASNS,MTR,ATIC,MYC,AHCYL1,NARS,BCAT1,BCKDHB,SUCLG2,SUCLG1,NDUFAB1,SUCLA2,STAT3,PSME4,GLO1,GLS,C3,GOT1,GOT2,GPI,MARS2,LIAS,GATC,OAT,HACD2,RPP14,NFS1,SLC7A6,CBS,MRPL39,QPRT,KYAT3,CARNMT1,PDHA1,PDK1,PDK3,PARK7,PEPD,GATB,PFAS,PGK1,ENOPH1,TXNRD1,TYMS…
GO:0044265	cellular macromolecule catabolic process	3.949e-09	2.856e-05	4.534e-07	4.291e-06	119	977	CLPP,RPL29,ZMPSTE24,RPS8,ETF1,LRRK2,UBAP1,BFAR,RPS23,RPS25,RPS27A,CNOT6,SCO1,ANAPC5,LCMT1,CUL4B,CUL2,CUL1,UBE2J1,CNOT11,XRN2,TRIB2,DCPS,LIN28B,USP28,SGTA,ERI1,SKP2,DIS3,MSN,EDEM3,KLHL15,SMARCC1,CDC23,AUP1,PABPC4,CLPX,FAF2,PSME4,RNPS1,SUPV3L1,ZPR1,PRPF19,HERC2,BTRC,USP22,CBL,DICER1,GSK3B,CCNF,USP10,CNOT9,AIFM1,CHEK2,HSP90B1,CTSC,PARK7,EXOSC8,TRIP12,ERCC8,PNPT1,UBA1,UBE3A,ANAPC1,UCHL3,PMAIP1,HSP90A…
GO:0006082	organic acid metabolic process	4.264e-09	3.084e-05	4.819e-07	4.56e-06	133	1131	ABAT,ACADM,MARS,ACLY,ACO2,ACOX1,MDH2,ME2,WARS2,LRRC47,FAH,BPNT1,FARSA,ACSM3,AHCY,LYPLA1,FH,ALDOA,SDHD,MPI,MPO,HACD3,LARS,ST3GAL2,TARS2,MORC2,YARS,IARS2,THEM4,SLC16A1,MTHFD1,ASNS,MTR,ATIC,MYC,AHCYL1,NARS,BCAT1,BCKDHB,SUCLG2,SUCLG1,NDUFAB1,SUCLA2,STAT3,PSME4,GLO1,GLS,C3,GOT1,GOT2,GPI,MARS2,LIAS,GATC,OAT,HACD2,RPP14,NFS1,SLC7A6,CBS,MRPL39,QPRT,KYAT3,CARNMT1,HEXA,HEXB,PDHA1,PDK1,PDK3,PARK7,PEPD,GATB,…
GO:0032204	regulation of telomere maintenance	5.018e-09	3.63e-05	5.584e-07	5.285e-06	21	68	ERCC4,CCT7,CCT4,CCT2,MAPKAPK5,CCT5,CCT8,MYC,DHX36,ATR,NBN,NEK2,TCP1,TERF2,CCT3,NABP2,XRCC5,DKC1,PINX1,GNL3,NAT10
GO:0043436	oxoacid metabolic process	5.639e-09	4.079e-05	6.18e-07	5.848e-06	131	1114	ABAT,ACADM,MARS,ACLY,ACO2,ACOX1,MDH2,ME2,WARS2,LRRC47,FAH,BPNT1,FARSA,ACSM3,AHCY,LYPLA1,FH,ALDOA,SDHD,MPI,MPO,HACD3,LARS,ST3GAL2,TARS2,MORC2,YARS,IARS2,THEM4,SLC16A1,MTHFD1,ASNS,MTR,ATIC,MYC,AHCYL1,NARS,BCAT1,BCKDHB,SUCLG2,SUCLG1,NDUFAB1,SUCLA2,STAT3,PSME4,GLO1,GLS,C3,GOT1,GOT2,GPI,MARS2,LIAS,GATC,OAT,HACD2,RPP14,NFS1,SLC7A6,CBS,MRPL39,QPRT,KYAT3,CARNMT1,HEXA,HEXB,PDHA1,PDK1,PDK3,PARK7,PEPD,GATB,…
GO:0051437	positive regulation of ubiquitin-protein ligase activity involved in regulation of mitotic cell cycle transition	8.36e-09	6.047e-05	9.025e-07	8.541e-06	22	76	RPS27A,ANAPC5,CUL1,CDC23,PSME4,BTRC,ANAPC1,PSMF1,ANAPC15,PSMA1,PSMA2,PSMA6,PSMB2,PSMB5,PSMB7,PSMC4,PSMC5,PSMD3,PSMD7,PSMD11,PSME2,PSME3
GO:0006457	protein folding	1.006e-08	7.276e-05	1.07e-06	1.013e-05	43	236	MKKS,DNAJA2,FKBP3,HSPA4L,CCT7,CCT4,CCT2,GRPEL1,CCT5,PPIL1,CCT8,DNAJB11,EMC1,ERP44,CLPX,TTC9C,RUVBL2,TBCE,RGPD2,TCP1,CANX,CDC37,PDCD5,HSP90B1,CCT3,PFDN1,PFDN2,DNAJC7,TXN,SELENOF,TXN2,HSP90AB1,HSP90AB3P,BAG4,BAG3,PPIL4,PPIB,PRKCSH,TMX1,SACS,PPIF,TRAP1,LMAN1
GO:0006446	regulation of translational initiation	1.248e-08	9.03e-05	1.309e-06	1.238e-05	23	84	RPS6KB1,IMPACT,EIF3L,FECH,EIF3M,MTIF2,EIF3A,EIF3B,EIF3C,EIF3D,EIF3G,EIF3I,EIF2B3,EIF2B5,PPP1R15B,EIF4H,POLR2D,EIF3E,PAIP2B,DDX3X,EIF2B1,EIF4EBP2,EIF2AK4
GO:0000375	RNA splicing, via transesterification reactions	1.426e-08	0.0001031	1.473e-06	1.394e-05	51	309	SF3B4,SMNDC1,BCAS2,PRMT5,SYNCRIP,DCPS,RBM22,SNRNP48,RBMX2,PPIL1,SMN2,DHX32,FUS,USP39,SNRPA,SNRPC,SNRPD1,CPSF3,SNRPF,SNRPN,WBP11,HNRNPM,SRPK1,SRPK2,RNPS1,SF3A3,C1QBP,HNRNPA0,PRPF19,CPSF2,NONO,SF3B3,PRPF4,WBP4,U2AF2,HNRNPF,EFTUD2,CLNS1A,WDR77,POLR2D,GEMIN5,SF1,PRPF31,PTBP1,DHX8,PRPF39,THRAP3,GEMIN7,RAVER2,DDX39A,HNRNPR
GO:0008380	RNA splicing	1.5e-08	0.0001085	1.528e-06	1.446e-05	61	402	ZNF326,SF3B4,SMNDC1,BCAS2,PRMT5,SYNCRIP,DCPS,RTCB,THOC5,RBM22,SNRNP48,PPP4R2,RBMX2,PPIL1,SMN2,DHX32,FUS,USP39,SNRPA,SNRPC,SNRPD1,CPSF3,SNRPF,SNRPN,WBP11,HNRNPM,SRPK1,SRPK2,RNPS1,SUPT6H,ZPR1,SF3A3,C1QBP,HNRNPA0,PRPF19,CPSF2,NONO,SF3B3,PRPF4,WBP4,U2AF2,HNRNPF,EFTUD2,PIK3R1,CLNS1A,WDR77,POLR2D,GEMIN5,VIRMA,SF1,PRPF31,PTBP1,DHX8,PRPF39,TSEN15,THRAP3,RBM28,GEMIN7,RAVER2,DDX39A,HNRNPR
GO:0046931	pore complex assembly	1.745e-08	0.0001262	1.753e-06	1.659e-05	10	16	NDC1,CCT8,NUP205,CCT3,AHCTF1,NUP93,TMEM170A,RTN4,TMEM33,ANO6
GO:0000959	mitochondrial RNA metabolic process	1.82e-08	0.0001316	1.803e-06	1.707e-05	14	33	SLC25A33,TARS2,MTERF2,CDK5RAP1,SUPV3L1,TFAM,ELAC2,PNPT1,MTO1,TRIT1,TRMT61B,DARS2,LRPPRC,SLIRP
GO:0000377	RNA splicing, via transesterification reactions with bulged adenosine as nucleophile	2.473e-08	0.0001788	2.385e-06	2.257e-05	50	305	SF3B4,BCAS2,PRMT5,SYNCRIP,DCPS,RBM22,SNRNP48,RBMX2,PPIL1,SMN2,DHX32,FUS,USP39,SNRPA,SNRPC,SNRPD1,CPSF3,SNRPF,SNRPN,WBP11,HNRNPM,SRPK1,SRPK2,RNPS1,SF3A3,C1QBP,HNRNPA0,PRPF19,CPSF2,NONO,SF3B3,PRPF4,WBP4,U2AF2,HNRNPF,EFTUD2,CLNS1A,WDR77,POLR2D,GEMIN5,SF1,PRPF31,PTBP1,DHX8,PRPF39,THRAP3,GEMIN7,RAVER2,DDX39A,HNRNPR
GO:0000398	mRNA splicing, via spliceosome	2.473e-08	0.0001788	2.385e-06	2.257e-05	50	305	SF3B4,BCAS2,PRMT5,SYNCRIP,DCPS,RBM22,SNRNP48,RBMX2,PPIL1,SMN2,DHX32,FUS,USP39,SNRPA,SNRPC,SNRPD1,CPSF3,SNRPF,SNRPN,WBP11,HNRNPM,SRPK1,SRPK2,RNPS1,SF3A3,C1QBP,HNRNPA0,PRPF19,CPSF2,NONO,SF3B3,PRPF4,WBP4,U2AF2,HNRNPF,EFTUD2,CLNS1A,WDR77,POLR2D,GEMIN5,SF1,PRPF31,PTBP1,DHX8,PRPF39,THRAP3,GEMIN7,RAVER2,DDX39A,HNRNPR
GO:0019081	viral translation	2.56e-08	0.0001851	2.436e-06	2.305e-05	8	10	EIF3L,EIF3A,EIF3B,EIF3D,EIF3G,SSB,PTBP1,EIF2AK4
GO:1904668	positive regulation of ubiquitin protein ligase activity	3.03e-08	0.0002192	2.847e-06	2.694e-05	22	81	RPS27A,ANAPC5,CUL1,CDC23,PSME4,BTRC,ANAPC1,PSMF1,ANAPC15,PSMA1,PSMA2,PSMA6,PSMB2,PSMB5,PSMB7,PSMC4,PSMC5,PSMD3,PSMD7,PSMD11,PSME2,PSME3
GO:0006259	DNA metabolic process	3.33e-08	0.0002409	3.088e-06	2.923e-05	117	992	CHAF1B,MCMBP,ERCC4,MCM2,MCM3,MCM6,MCM7,RPS27A,MCM10,ABRAXAS1,PRMT5,ZSWIM7,CUL4B,XRN2,USP28,SLC25A33,APEX1,CCT7,CCT4,CCT2,FANCM,MAPKAPK5,RUVBL1,CCT5,PPP4R2,HLTF,CCT8,GINS2,CCNB1IP1,MYC,DHX36,ATR,BACH1,MEIOB,NBN,SRPK1,SSRP1,RUVBL2,ALKBH1,NEK2,PSME4,SUPT6H,SUPV3L1,ZPR1,PRPF19,TIMELESS,APOBEC3C,HERC2,COPS6,NONO,TCP1,BAZ1B,TERF2,TFAM,CBS,PMS2CL,DICER1,GSK3B,USP10,MSH6,GTF2H1,AIFM1,SUPT16H,CHEK2,CDC6,C…
GO:0001731	formation of translation preinitiation complex	3.517e-08	0.0002544	3.22e-06	3.048e-05	12	25	EIF3L,EIF3M,EIF3A,EIF3B,EIF3C,EIF3D,EIF3G,EIF3I,EIF4H,EIF3E,EIF2D,EIF2S3
GO:0002479	antigen processing and presentation of exogenous peptide antigen via MHC class I, TAP-dependent	5.498e-08	0.0003977	4.971e-06	4.704e-05	19	64	FCGR1A,NCF2,PSME4,PSMF1,CYBB,PSMA1,PSMA2,PSMA6,PSMB2,PSMB5,PSMB7,PSMC4,PSMC5,PSMD3,PSMD7,PSMD11,PSME2,ITGAV,PSME3
GO:0031145	anaphase-promoting complex-dependent catabolic process	5.75e-08	0.0004159	5.134e-06	4.859e-05	21	77	RPS27A,ANAPC5,SKP2,CDC23,PSME4,ANAPC1,PSMF1,ANAPC15,PSMA1,PSMA2,PSMA6,PSMB2,PSMB5,PSMB7,PSMC4,PSMC5,PSMD3,PSMD7,PSMD11,PSME2,PSME3
GO:1904871	positive regulation of protein localization to Cajal body	6.866e-08	0.0004966	5.983e-06	5.662e-05	7	8	CCT7,CCT4,CCT2,CCT5,CCT8,TCP1,CCT3
GO:1904869	regulation of protein localization to Cajal body	6.866e-08	0.0004966	5.983e-06	5.662e-05	7	8	CCT7,CCT4,CCT2,CCT5,CCT8,TCP1,CCT3
GO:0032206	positive regulation of telomere maintenance	7.25e-08	0.0005244	6.242e-06	5.908e-05	16	47	CCT7,CCT4,CCT2,MAPKAPK5,CCT5,CCT8,DHX36,ATR,NBN,NEK2,TCP1,TERF2,CCT3,NABP2,DKC1,GNL3
GO:0000470	maturation of LSU-rRNA	7.762e-08	0.0005614	6.576e-06	6.223e-05	11	22	NSA2,RPF2,RPF1,WDR12,FTSJ3,MAK16,PES1,GTPBP4,RSL1D1,NOL9,LAS1L
GO:1904666	regulation of ubiquitin protein ligase activity	7.819e-08	0.0005655	6.576e-06	6.223e-05	22	85	RPS27A,ANAPC5,CUL1,CDC23,PSME4,BTRC,ANAPC1,PSMF1,ANAPC15,PSMA1,PSMA2,PSMA6,PSMB2,PSMB5,PSMB7,PSMC4,PSMC5,PSMD3,PSMD7,PSMD11,PSME2,PSME3
GO:0044248	cellular catabolic process	8.842e-08	0.0006395	7.351e-06	6.957e-05	188	1828	CLPP,RPL29,ABAT,ZMPSTE24,ACADM,DRAM1,ACOX1,RPS8,ETF1,LRRK2,UBAP1,BFAR,RPS23,RPS25,RPS27A,CNOT6,PIK3R4,FAH,PARL,AHCY,SCO1,ATP6V0D2,ANAPC5,LCMT1,MPO,CUL4B,CUL2,CUL1,UBE2J1,CNOT11,XRN2,TRIB2,DCPS,LIN28B,USP28,SGTA,ERI1,SKP2,DIS3,GDE1,MSN,EDEM3,ATP6V1H,RUVBL1,TBK1,KLHL15,NT5C2,SMARCC1,BECN1,CDC23,SNX5,MYC,WBP11,AUP1,ADAM9,PABPC4,BCAT1,NCF2,BCKDHB,CLPX,STAT3,BLVRA,FAF2,PSME4,RNPS1,SUPV3L1,ZPR1,GLO1,GL…
GO:0070727	cellular macromolecule localization	9.512e-08	0.000688	7.818e-06	7.399e-05	175	1676	GPHN,SEH1L,RPL29,LIN7C,RPS8,LRRK2,OBSCN,RPS23,RPS25,RPS27A,TOMM5,ADAR,RAB8A,PIK3R4,STX18,XPO5,MIPEP,PARL,LYPLA1,CCL2,TOMM40,TIMM44,SEC23B,UBE2J1,APPBP2,IPO8,IPO7,COPG1,SLC25A6,CTDSPL2,ICK,CCT7,CCT4,CCT2,TRAPPC8,AP3M1,ARCN1,MSN,C16orf70,RBM22,NOP58,NDC1,RUVBL1,TIMM21,CCT5,INTS13,TIMM50,NUP133,CCT8,ATP1B1,BECN1,SNX5,MBTPS1,AHCYL1,WBP11,GGA2,ATR,AUP1,SEC24A,HNRNPM,SRP19,SRP68,SRP72,SSB,EPB41L3,RUVBL…
GO:0034613	cellular protein localization	1.023e-07	0.00074	8.264e-06	7.821e-05	174	1666	GPHN,SEH1L,RPL29,LIN7C,RPS8,LRRK2,OBSCN,RPS23,RPS25,RPS27A,TOMM5,ADAR,RAB8A,PIK3R4,STX18,XPO5,MIPEP,PARL,LYPLA1,CCL2,TOMM40,TIMM44,SEC23B,UBE2J1,APPBP2,IPO8,IPO7,COPG1,SLC25A6,CTDSPL2,ICK,CCT7,CCT4,CCT2,TRAPPC8,AP3M1,ARCN1,MSN,C16orf70,RBM22,NOP58,NDC1,RUVBL1,TIMM21,CCT5,INTS13,TIMM50,NUP133,CCT8,ATP1B1,BECN1,SNX5,MBTPS1,AHCYL1,WBP11,GGA2,ATR,AUP1,SEC24A,HNRNPM,SRP19,SRP68,SRP72,SSB,EPB41L3,RUVBL…
GO:0070198	protein localization to chromosome, telomeric region	1.028e-07	0.0007438	8.264e-06	7.821e-05	12	27	CCT7,CCT4,CCT2,CCT5,CCT8,ATR,TCP1,TERF2,NABP2,DKC1,PINX1,GNL3
GO:0043624	cellular protein complex disassembly	1.268e-07	0.0009172	1.008e-05	9.539e-05	38	213	RIDA,ETF1,MRPL30,MRPL35,MRPS28,SGK1,MRPL13,MRPL45,GAS2L1,MRPL15,MRPS23,SMN2,MRPS27,MRPL39,MRPL3,MRPS35,MRPS21,MRPL50,MRPL58,MRPS15,MRPS9,MRPS5,MRPL40,MRPL32,MRPL11,MRPL9,DNAJC6,MRPL16,CHCHD1,MRPL20,MRPL47,MRPL53,MRPS16,UPF1,MRPL2,MRPS7,OGFOD1,MRPL46
GO:0051351	positive regulation of ligase activity	1.37e-07	0.0009909	1.077e-05	0.0001019	25	109	RPS27A,ANAPC5,CUL1,TRIB2,DCUN1D5,CDC23,PSME4,BTRC,ANAPC1,PSMF1,ANAPC15,PSMA1,PSMA2,PSMA6,PSMB2,PSMB5,PSMB7,PSMC4,PSMC5,PSMD3,PSMD7,PSMD11,PSME2,PSME3,NHEJ1
GO:0006418	tRNA aminoacylation for protein translation	1.409e-07	0.001019	1.096e-05	0.0001037	16	49	MARS,WARS2,LRRC47,FARSA,LARS,TARS2,YARS,IARS2,NARS,MARS2,MRPL39,VARS,PPA1,DARS,KARS,DARS2
GO:0009057	macromolecule catabolic process	1.523e-07	0.001101	1.172e-05	0.0001109	135	1223	CLPP,RPL29,ZMPSTE24,RPS8,ETF1,LRRK2,UBAP1,BFAR,RPS23,RPS25,RPS27A,CNOT6,PIK3R4,LYPLA1,SCO1,ANAPC5,LCMT1,CUL4B,CUL2,CUL1,UBE2J1,CNOT11,XRN2,TRIB2,DCPS,LIN28B,USP28,SGTA,ERI1,SKP2,DIS3,MSN,EDEM3,KLHL15,SMARCC1,FUCA1,BECN1,CDC23,AUP1,ADAM9,PABPC4,CLPX,FAF2,PSME4,RNPS1,SUPV3L1,ZPR1,PRPF19,HERC2,BTRC,USP22,CBL,CBLB,DICER1,GSK3B,CCNF,USP10,SF3B3,CNOT9,AIFM1,GYG1,CHEK2,HEXA,HEXB,HSP90B1,CTSC,PARK7,EXOSC…
GO:0022411	cellular component disassembly	1.589e-07	0.001149	1.21e-05	0.0001145	84	663	RIDA,SEH1L,CHAF1B,ETF1,MRPL30,OBSCN,KRCC1,MRPL35,FBN1,PARL,MMP9,MMP14,MRPS28,SGK1,ANXA5,MRPL13,ZCCHC17,MRPL45,GAS2L1,NDC1,RUVBL1,MRPL15,MTIF2,MRPS23,NUP133,SMARCC1,SMN2,ATP1B1,BECN1,SNRPD1,SNRPF,WBP11,SPP1,STK26,MRPS27,NUP205,CAPNS1,DICER1,GSK3B,POLR3A,MRPL39,CDC37,AIFM1,SUPT16H,WDR45B,MRPL3,PDK1,PARK7,MRPS35,U2AF2,HMGA1,MRPS21,VDAC1,MRPL50,MRPL58,MRPS15,MRPS9,MRPS5,PRKCA,MRPL40,MRPL32,NUP93,CTSG…
GO:0042590	antigen processing and presentation of exogenous peptide antigen via MHC class I	1.606e-07	0.001162	1.21e-05	0.0001145	19	68	FCGR1A,NCF2,PSME4,PSMF1,CYBB,PSMA1,PSMA2,PSMA6,PSMB2,PSMB5,PSMB7,PSMC4,PSMC5,PSMD3,PSMD7,PSMD11,PSME2,ITGAV,PSME3
GO:0006732	coenzyme metabolic process	1.686e-07	0.001219	1.257e-05	0.0001189	51	333	GPHN,ACLY,MDH2,ME2,AHCY,ALDOA,MPI,THEM4,FAR2,MTHFD1,MTR,ATIC,COASY,MYC,AHCYL1,NCF2,COQ3,NDUFA9,SUCLG2,SUCLG1,SUCLA2,STAT3,MOCS3,GPI,LIAS,HACD2,NFS1,TKT,QPRT,PDHA1,PDK1,PDK3,ACOT9,PGK1,TXNRD1,TYMS,SLC25A32,PKLR,PKM,PRDX5,MTHFD1L,IDH3B,CS,NUDT12,DLAT,LDHA,LDHB,DERA,NAMPT,ENO1,COQ7
GO:0051443	positive regulation of ubiquitin-protein transferase activity	1.77e-07	0.00128	1.306e-05	0.0001236	24	103	RPS27A,ANAPC5,CUL1,TRIB2,DCUN1D5,CDC23,PSME4,BTRC,ANAPC1,PSMF1,ANAPC15,PSMA1,PSMA2,PSMA6,PSMB2,PSMB5,PSMB7,PSMC4,PSMC5,PSMD3,PSMD7,PSMD11,PSME2,PSME3
GO:0032984	macromolecular complex disassembly	1.787e-07	0.001293	1.306e-05	0.0001236	45	278	RIDA,ETF1,MRPL30,MRPL35,MRPS28,SGK1,MRPL13,MRPL45,GAS2L1,MRPL15,MTIF2,MRPS23,SMARCC1,SMN2,MRPS27,GSK3B,MRPL39,SUPT16H,MRPL3,MRPS35,HMGA1,MRPS21,MRPL50,MRPL58,MRPS15,MRPS9,MRPS5,MRPL40,MRPL32,MRPL11,MRPL9,DNAJC6,MRPL16,CHCHD1,MRPL20,MRPL47,MRPL53,MRPS16,UPF1,MRPL2,MRPS7,EIF2D,OGFOD1,LRP6,MRPL46
GO:0006886	intracellular protein transport	2.1e-07	0.001519	1.519e-05	0.0001437	124	1105	RPL29,RPS8,LRRK2,RPS23,RPS25,RPS27A,TOMM5,ADAR,PIK3R4,STX18,XPO5,MIPEP,PARL,LYPLA1,CCL2,TOMM40,TIMM44,SEC23B,UBE2J1,APPBP2,IPO8,IPO7,COPG1,SLC25A6,CTDSPL2,ICK,TRAPPC8,AP3M1,ARCN1,C16orf70,RBM22,NOP58,RUVBL1,TIMM21,TIMM50,NUP133,ATP1B1,BECN1,SNX5,MBTPS1,AHCYL1,WBP11,GGA2,AUP1,SEC24A,SRP19,SRP68,SRP72,STAT3,NUP205,FAF2,PMPCA,ZPR1,AFG3L2,VAMP7,TBC1D12,HERC2,AP3D1,RGPD2,RAB31,VPS39,XPO4,CBLB,GSK3B,PO…
GO:1904816	positive regulation of protein localization to chromosome, telomeric region	2.473e-07	0.001789	1.764e-05	0.0001669	8	12	CCT7,CCT4,CCT2,CCT5,CCT8,TCP1,DKC1,GNL3
GO:0090305	nucleic acid phosphodiester bond hydrolysis	2.488e-07	0.001799	1.764e-05	0.0001669	44	272	RIDA,ERCC4,RPS27A,CNOT6,ELAC1,CUL4B,XRN2,DCPS,NOB1,RPP30,APEX1,ERI1,FANCM,DIS3,NOP14,TSR1,CPSF3,MEIOB,RRP36,RRS1,UTP20,CPSF2,RPP14,DICER1,GTF2H1,PDE12,AIFM1,EXOSC8,TSN,ELAC2,PNPT1,EXOSC9,BMS1,DFFA,TSEN15,KPNB1,EXOSC3,NOL9,RFC2,FCF1,G3BP1,ISG20L2,LAS1L,RPA2
GO:1904851	positive regulation of establishment of protein localization to telomere	2.896e-07	0.002095	1.976e-05	0.000187	7	9	CCT7,CCT4,CCT2,CCT5,CCT8,TCP1,DKC1
GO:1990173	protein localization to nucleoplasm	2.896e-07	0.002095	1.976e-05	0.000187	7	9	CCT7,CCT4,CCT2,CCT5,CCT8,TCP1,CCT3
GO:1903405	protein localization to nuclear body	2.896e-07	0.002095	1.976e-05	0.000187	7	9	CCT7,CCT4,CCT2,CCT5,CCT8,TCP1,CCT3
GO:1904867	protein localization to Cajal body	2.896e-07	0.002095	1.976e-05	0.000187	7	9	CCT7,CCT4,CCT2,CCT5,CCT8,TCP1,CCT3
GO:0045333	cellular respiration	3.371e-07	0.002439	2.266e-05	0.0002144	33	178	ACO2,MDH2,FH,UQCRHL,SDHD,NOA1,MYC,NDUFA1,NDUFA9,SUCLG2,SUCLG1,NDUFAB1,SUCLA2,NDUFB5,NDUFS1,OXA1L,PDHA1,PARK7,PNPT1,COX5A,UQCRFS1,PMPCB,COX6A1,COX7B,COX7C,IDH3B,CS,COA6,DLAT,FASTKD1,TRAP1,NDUFAF1,COQ7
GO:0051436	negative regulation of ubiquitin-protein ligase activity involved in mitotic cell cycle	3.383e-07	0.002447	2.266e-05	0.0002144	19	71	RPS27A,ANAPC5,CDC23,ANAPC1,PSMF1,ANAPC15,PSMA1,PSMA2,PSMA6,PSMB2,PSMB5,PSMB7,PSMC4,PSMC5,PSMD3,PSMD7,PSMD11,PSME2,PSME3
GO:2000060	positive regulation of protein ubiquitination involved in ubiquitin-dependent protein catabolic process	3.529e-07	0.002552	2.341e-05	0.0002216	22	92	RPS27A,ANAPC5,CUL1,CDC23,PSME4,BTRC,ANAPC1,PSMF1,ANAPC15,PSMA1,PSMA2,PSMA6,PSMB2,PSMB5,PSMB7,PSMC4,PSMC5,PSMD3,PSMD7,PSMD11,PSME2,PSME3
GO:0043241	protein complex disassembly	3.849e-07	0.002784	2.531e-05	0.0002395	43	267	RIDA,ETF1,MRPL30,MRPL35,MRPS28,SGK1,MRPL13,MRPL45,GAS2L1,MRPL15,MRPS23,SMARCC1,SMN2,MRPS27,GSK3B,MRPL39,SUPT16H,MRPL3,MRPS35,HMGA1,MRPS21,MRPL50,MRPL58,MRPS15,MRPS9,MRPS5,MRPL40,MRPL32,MRPL11,MRPL9,DNAJC6,MRPL16,CHCHD1,MRPL20,MRPL47,MRPL53,MRPS16,UPF1,MRPL2,MRPS7,OGFOD1,LRP6,MRPL46
GO:0009141	nucleoside triphosphate metabolic process	3.982e-07	0.00288	2.595e-05	0.0002456	46	295	GPHN,LRRK2,ALDOA,UQCRHL,MPI,SLC25A33,ATP1B1,ATP5F1A,MYC,ATP5PB,ATP5MC1,ATP5PF,CMPK1,NDUFA1,NDUFA9,SUCLG1,NDUFAB1,NDUFB5,NDUFS1,STAT3,MOCS3,GPI,NFS1,ATP6V0A2,PARK7,PGK1,TYMS,CTPS2,COX5A,PKLR,PKM,UQCRFS1,DCTPP1,PMPCB,COX6A1,COX7B,COX7C,ATP5MF,CTPS1,COA6,ENTPD7,LDHA,PPIF,NDUFAF1,ENO1,COQ7
GO:0051439	regulation of ubiquitin-protein ligase activity involved in mitotic cell cycle	4.292e-07	0.003104	2.762e-05	0.0002614	19	72	RPS27A,ANAPC5,CDC23,ANAPC1,PSMF1,ANAPC15,PSMA1,PSMA2,PSMA6,PSMB2,PSMB5,PSMB7,PSMC4,PSMC5,PSMD3,PSMD7,PSMD11,PSME2,PSME3
GO:0051340	regulation of ligase activity	4.315e-07	0.003121	2.762e-05	0.0002614	26	123	RPS27A,ANAPC5,CUL1,TRIB2,DCUN1D5,CDC23,PSME4,BTRC,PARK7,ANAPC1,PSMF1,ANAPC15,PSMA1,PSMA2,PSMA6,PSMB2,PSMB5,PSMB7,PSMC4,PSMC5,PSMD3,PSMD7,PSMD11,PSME2,PSME3,NHEJ1
GO:0051169	nuclear transport	4.501e-07	0.003255	2.856e-05	0.0002702	67	502	SEH1L,ADAR,XPO5,IPO8,IPO7,CTDSPL2,THOC5,RBM22,NOP58,NDC1,RBMX2,NUP133,SMN2,SNRPD1,CPSF3,SNRPF,MBTPS1,AHCYL1,STAT3,NUP205,RNPS1,RRS1,SUPT6H,ZPR1,CPSF2,RGPD2,XPO4,CBLB,GSK3B,TGFBR1,THRA,PRDX1,TNPO3,DDX19B,DDX58,PARK7,PHB2,U2AF2,KPNA6,HMGA1,TXN,PIK3R1,AGFG1,HSP90AB1,POLR2D,XBP1,GEMIN5,PPP1CC,MAPK14,PPP3CA,NUP93,NOL6,KEAP1,PTPN11,SLBP,KPNB1,KPNA4,TNPO1,IPO5,RAN,UPF1,SDAD1,NMD3,GEMIN7,DDX39A,SMAD4,IPO…
GO:0009116	nucleoside metabolic process	5.022e-07	0.003633	3.159e-05	0.0002989	58	413	GPHN,ACPP,LRRK2,BPNT1,AHCY,ALDOA,UQCRHL,MPI,SLC25A33,NT5C2,ATIC,COASY,ATP1B1,ATP5F1A,MYC,ATP5PB,ATP5MC1,ATP5PF,CMPK1,AHCYL1,NDUFA1,NDUFA9,NDUFAB1,NDUFB5,NDUFS1,STAT3,MOCS3,APOBEC3C,GPI,NFS1,ATP6V0A2,PARK7,PGK1,TYMS,CTPS2,COX5A,HPRT1,PKLR,PKM,TJP2,UMPS,UQCRFS1,PMPCB,COX6A1,COX7B,COX7C,ATP5MF,PPAT,CTPS1,IMPDH2,SLC35B2,COA6,LDHA,PPIF,DERA,NDUFAF1,ENO1,COQ7
GO:0006913	nucleocytoplasmic transport	5.282e-07	0.003821	3.294e-05	0.0003117	66	494	SEH1L,ADAR,XPO5,IPO8,IPO7,CTDSPL2,THOC5,RBM22,NOP58,NDC1,RBMX2,NUP133,SMN2,SNRPD1,CPSF3,SNRPF,MBTPS1,AHCYL1,STAT3,NUP205,RNPS1,RRS1,SUPT6H,ZPR1,CPSF2,RGPD2,XPO4,CBLB,GSK3B,TGFBR1,THRA,PRDX1,TNPO3,DDX19B,DDX58,PARK7,PHB2,U2AF2,KPNA6,TXN,PIK3R1,AGFG1,HSP90AB1,POLR2D,XBP1,GEMIN5,PPP1CC,MAPK14,PPP3CA,NUP93,NOL6,KEAP1,PTPN11,SLBP,KPNB1,KPNA4,TNPO1,IPO5,RAN,UPF1,SDAD1,NMD3,GEMIN7,DDX39A,SMAD4,IPO11
GO:1904667	negative regulation of ubiquitin protein ligase activity	5.418e-07	0.003919	3.349e-05	0.000317	19	73	RPS27A,ANAPC5,CDC23,ANAPC1,PSMF1,ANAPC15,PSMA1,PSMA2,PSMA6,PSMB2,PSMB5,PSMB7,PSMC4,PSMC5,PSMD3,PSMD7,PSMD11,PSME2,PSME3
GO:0042787	protein ubiquitination involved in ubiquitin-dependent protein catabolic process	5.797e-07	0.004193	3.553e-05	0.0003363	36	208	BFAR,RPS27A,ANAPC5,CUL4B,CUL2,CUL1,KLHL15,CDC23,PSME4,HERC2,BTRC,CBL,TRIP12,UBE3A,ANAPC1,PSMF1,RCHY1,ANAPC15,DZIP3,PSMA1,PSMA2,PSMA6,PSMB2,PSMB5,PSMB7,PSMC4,PSMC5,PSMD3,PSMD7,PSMD11,PSME2,KEAP1,ITCH,RBBP6,C18orf25,PSME3
GO:1901657	glycosyl compound metabolic process	5.942e-07	0.004298	3.611e-05	0.0003418	60	435	GPHN,ACPP,LRRK2,BPNT1,AHCY,ALDOA,UQCRHL,MPI,SLC25A33,NT5C2,FUCA1,ATIC,FUCA2,COASY,ATP1B1,ATP5F1A,MYC,ATP5PB,ATP5MC1,ATP5PF,CMPK1,AHCYL1,NDUFA1,NDUFA9,NDUFAB1,NDUFB5,NDUFS1,STAT3,MOCS3,APOBEC3C,GPI,NFS1,ATP6V0A2,PARK7,PGK1,TYMS,CTPS2,COX5A,HPRT1,PKLR,PKM,TJP2,UMPS,UQCRFS1,PMPCB,COX6A1,COX7B,COX7C,ATP5MF,PPAT,CTPS1,IMPDH2,SLC35B2,COA6,LDHA,PPIF,DERA,NDUFAF1,ENO1,COQ7
GO:0006999	nuclear pore organization	6.595e-07	0.00477	3.975e-05	0.0003762	9	17	SEH1L,NDC1,NUP133,NUP205,AHCTF1,NUP93,TMEM170A,RTN4,TMEM33
GO:0009161	ribonucleoside monophosphate metabolic process	6.737e-07	0.004873	4.027e-05	0.0003811	45	291	ALDOA,UQCRHL,MPI,SLC25A33,PAICS,NT5C2,ATIC,ATP1B1,ATP5F1A,MYC,ATP5PB,ATP5MC1,ATP5PF,CMPK1,NDUFA1,NDUFA9,NDUFAB1,NDUFB5,NDUFS1,STAT3,GPI,ATP6V0A2,PARK7,PFAS,PGK1,COX5A,HPRT1,PKLR,PKM,TJP2,UMPS,UQCRFS1,PMPCB,COX6A1,COX7B,COX7C,ATP5MF,PPAT,IMPDH2,COA6,LDHA,PPIF,NDUFAF1,ENO1,COQ7
GO:0051444	negative regulation of ubiquitin-protein transferase activity	6.882e-07	0.004978	4.08e-05	0.0003861	20	81	RPS27A,ANAPC5,CDC23,PARK7,ANAPC1,PSMF1,ANAPC15,PSMA1,PSMA2,PSMA6,PSMB2,PSMB5,PSMB7,PSMC4,PSMC5,PSMD3,PSMD7,PSMD11,PSME2,PSME3
GO:2000058	regulation of protein ubiquitination involved in ubiquitin-dependent protein catabolic process	7.134e-07	0.00516	4.195e-05	0.000397	23	103	RPS27A,ANAPC5,CUL1,CDC23,PSME4,BTRC,UBE3A,ANAPC1,PSMF1,ANAPC15,PSMA1,PSMA2,PSMA6,PSMB2,PSMB5,PSMB7,PSMC4,PSMC5,PSMD3,PSMD7,PSMD11,PSME2,PSME3
GO:0090502	RNA phosphodiester bond hydrolysis, endonucleolytic	8.184e-07	0.005919	4.774e-05	0.0004518	18	68	RIDA,ELAC1,NOB1,RPP30,APEX1,NOP14,TSR1,CPSF3,RRS1,UTP20,RPP14,DICER1,ELAC2,BMS1,TSEN15,NOL9,FCF1,LAS1L
GO:1901607	alpha-amino acid biosynthetic process	8.499e-07	0.006147	4.908e-05	0.0004645	20	82	AHCY,MTHFD1,ASNS,MTR,ATIC,GLS,GOT1,GOT2,OAT,CBS,PARK7,ENOPH1,PYCR2,ASNSD1,PSAT1,MTHFD1L,CTH,PHGDH,DHPS,EIF2B1
GO:0002223	stimulatory C-type lectin receptor signaling pathway	8.55e-07	0.006184	4.908e-05	0.0004645	23	104	RPS27A,CUL1,PSME4,BTRC,NRAS,CLEC7A,CHUK,PSMF1,PSMA1,PSMA2,PSMA6,PSMB2,PSMB5,PSMB7,PSMC4,PSMC5,PSMD3,PSMD7,PSMD11,PSME2,KRAS,PSME3,LYN
GO:0070203	regulation of establishment of protein localization to telomere	9.056e-07	0.00655	5.158e-05	0.0004881	7	10	CCT7,CCT4,CCT2,CCT5,CCT8,TCP1,DKC1
GO:0008652	cellular amino acid biosynthetic process	9.341e-07	0.006756	5.278e-05	0.0004995	22	97	ABAT,AHCY,MTHFD1,ASNS,MTR,ATIC,BCAT1,GLS,GOT1,GOT2,OAT,CBS,PARK7,ENOPH1,PYCR2,ASNSD1,PSAT1,MTHFD1L,CTH,PHGDH,DHPS,EIF2B1
GO:0009123	nucleoside monophosphate metabolic process	9.503e-07	0.006873	5.299e-05	0.0005015	46	304	ALDOA,UQCRHL,MPI,SLC25A33,PAICS,NT5C2,ATIC,ATP1B1,ATP5F1A,MYC,ATP5PB,ATP5MC1,ATP5PF,CMPK1,NDUFA1,NDUFA9,NDUFAB1,NDUFB5,NDUFS1,STAT3,GPI,ATP6V0A2,PARK7,PFAS,PGK1,TYMS,COX5A,HPRT1,PKLR,PKM,TJP2,UMPS,UQCRFS1,PMPCB,COX6A1,COX7B,COX7C,ATP5MF,PPAT,IMPDH2,COA6,LDHA,PPIF,NDUFAF1,ENO1,COQ7
GO:0051438	regulation of ubiquitin-protein transferase activity	9.524e-07	0.006889	5.299e-05	0.0005015	25	120	RPS27A,ANAPC5,CUL1,TRIB2,DCUN1D5,CDC23,PSME4,BTRC,PARK7,ANAPC1,PSMF1,ANAPC15,PSMA1,PSMA2,PSMA6,PSMB2,PSMB5,PSMB7,PSMC4,PSMC5,PSMD3,PSMD7,PSMD11,PSME2,PSME3
GO:0044770	cell cycle phase transition	1.022e-06	0.007392	5.642e-05	0.000534	71	555	RPS6KB1,MCM2,MCM3,MCM6,MCM7,CEP76,RPS27A,MCM10,RAB8A,CNOT6,AIF1,ANAPC5,LCMT1,CUL4B,CUL2,CUL1,CNOT11,APEX1,APP,SKP2,HAUS1,CDC23,BACH1,BCAT1,NBN,RCC2,NEK2,PSME4,ZPR1,PRPF19,TIMELESS,BTRC,PIM2,CCNG1,CNOT9,CHEK2,CDC6,CDC25A,CDK4,ORC6,PHB2,TYMS,ANAPC1,PLAGL1,PSMF1,WEE1,ANAPC15,PPAT,PPP3CA,PPP6C,PRKDC,PSMA1,PSMA2,PSMA6,PSMB2,PSMB5,PSMB7,PSMC4,PSMC5,PSMD3,PSMD7,PSMD11,PSME2,DDX3X,TIPIN,ARID3A,CHMP4B,LMN…
GO:0051352	negative regulation of ligase activity	1.046e-06	0.007562	5.729e-05	0.0005422	20	83	RPS27A,ANAPC5,CDC23,PARK7,ANAPC1,PSMF1,ANAPC15,PSMA1,PSMA2,PSMA6,PSMB2,PSMB5,PSMB7,PSMC4,PSMC5,PSMD3,PSMD7,PSMD11,PSME2,PSME3
GO:0032508	DNA duplex unwinding	1.06e-06	0.007668	5.765e-05	0.0005456	19	76	MCM2,MCM3,MCM6,MCM7,RPS27A,CUL4B,CHD8,RUVBL1,GINS2,NBN,RUVBL2,SUPV3L1,GTF2H1,CHD1,CHD4,HMGA1,XRCC5,DDX3X,G3BP1
GO:0009167	purine ribonucleoside monophosphate metabolic process	1.298e-06	0.00939	7.007e-05	0.0006631	43	279	ALDOA,UQCRHL,MPI,SLC25A33,PAICS,NT5C2,ATIC,ATP1B1,ATP5F1A,MYC,ATP5PB,ATP5MC1,ATP5PF,NDUFA1,NDUFA9,NDUFAB1,NDUFB5,NDUFS1,STAT3,GPI,ATP6V0A2,PARK7,PFAS,PGK1,COX5A,HPRT1,PKLR,PKM,TJP2,UQCRFS1,PMPCB,COX6A1,COX7B,COX7C,ATP5MF,PPAT,IMPDH2,COA6,LDHA,PPIF,NDUFAF1,ENO1,COQ7
GO:1904814	regulation of protein localization to chromosome, telomeric region	1.318e-06	0.009534	7.01e-05	0.0006634	8	14	CCT7,CCT4,CCT2,CCT5,CCT8,TCP1,DKC1,GNL3
GO:0000478	endonucleolytic cleavage involved in rRNA processing	1.318e-06	0.009534	7.01e-05	0.0006634	8	14	NOP14,TSR1,RRS1,UTP20,BMS1,NOL9,FCF1,LAS1L
GO:0009199	ribonucleoside triphosphate metabolic process	1.343e-06	0.009712	7.089e-05	0.0006709	42	270	GPHN,LRRK2,ALDOA,UQCRHL,MPI,SLC25A33,ATP1B1,ATP5F1A,MYC,ATP5PB,ATP5MC1,ATP5PF,NDUFA1,NDUFA9,NDUFAB1,NDUFB5,NDUFS1,STAT3,MOCS3,GPI,NFS1,ATP6V0A2,PARK7,PGK1,CTPS2,COX5A,PKLR,PKM,UQCRFS1,PMPCB,COX6A1,COX7B,COX7C,ATP5MF,CTPS1,COA6,ENTPD7,LDHA,PPIF,NDUFAF1,ENO1,COQ7
GO:0051726	regulation of cell cycle	1.366e-06	0.009878	7.158e-05	0.0006774	112	1008	RPS6KB1,CEP76,RPS27A,CNOT6,PIK3R4,CITED2,PRMT5,AIF1,ANAPC5,LCMT1,CUL4B,CUL2,CUL1,CNOT11,SGK1,SLC25A33,APEX1,ICK,APP,SKIL,SKP2,THOC5,GAS2L1,MAPRE3,INTS13,ASNS,CDK5RAP1,CENPV,PRR11,BECN1,TXLNG,CDC23,MYC,BCAT1,NBN,SRPK2,RCC2,PDCD4,STAT3,NEK2,PSME4,CDC123,PRPF19,BTRC,NRAS,USP22,PIM2,TERF2,DICER1,CCNF,CDC37,CCNG1,CCNG2,TGFBR1,THBS1,GTF2H1,CNOT9,PA2G4,PEBP1,PES1,CHEK2,CDC6,CDC25A,CDK4,CDK8,GTPBP4,PHB2,…
GO:0006101	citrate metabolic process	1.405e-06	0.01016	7.235e-05	0.0006847	12	33	ACLY,ACO2,MDH2,FH,SDHD,SUCLG2,SUCLG1,SUCLA2,PDHA1,IDH3B,CS,DLAT
GO:0009303	rRNA transcription	1.405e-06	0.01016	7.235e-05	0.0006847	12	33	MARS,POLR1B,NIFK,NCL,GTF3A,GTF3C1,GTF3C2,POLR1E,POLR1A,NOL11,PIH1D1,GTF3C6
GO:0042255	ribosome assembly	1.415e-06	0.01023	7.235e-05	0.0006847	16	57	RPS25,RPF2,RPF1,NSUN4,TSR1,C1QBP,MRPL11,BMS1,DDX3X,ERAL1,MRPL20,MRPS7,MRTO4,EIF2A,RSL24D1,RPL12
GO:0009126	purine nucleoside monophosphate metabolic process	1.43e-06	0.01035	7.235e-05	0.0006847	43	280	ALDOA,UQCRHL,MPI,SLC25A33,PAICS,NT5C2,ATIC,ATP1B1,ATP5F1A,MYC,ATP5PB,ATP5MC1,ATP5PF,NDUFA1,NDUFA9,NDUFAB1,NDUFB5,NDUFS1,STAT3,GPI,ATP6V0A2,PARK7,PFAS,PGK1,COX5A,HPRT1,PKLR,PKM,TJP2,UQCRFS1,PMPCB,COX6A1,COX7B,COX7C,ATP5MF,PPAT,IMPDH2,COA6,LDHA,PPIF,NDUFAF1,ENO1,COQ7
GO:0007346	regulation of mitotic cell cycle	1.43e-06	0.01035	7.235e-05	0.0006847	66	508	RPS6KB1,RPS27A,CNOT6,PRMT5,AIF1,ANAPC5,LCMT1,CUL4B,CUL1,CNOT11,APEX1,APP,INTS13,ASNS,BECN1,CDC23,MYC,BCAT1,NBN,RCC2,NEK2,PSME4,CDC123,BTRC,USP22,PIM2,CCNG1,CNOT9,PEBP1,CHEK2,CDC6,CDK4,PHB2,ANAPC1,NABP2,PLAGL1,PSMF1,ANAPC15,IGF1R,PRCC,PRKCA,PRKDC,POLDIP2,PSMA1,PSMA2,PSMA6,PSMB2,PSMB5,PSMB7,PSMC4,PSMC5,PSMD3,PSMD7,PSMD11,PSME2,DDX3X,PTPN11,TIPIN,ARID3A,FZD3,CHMP4B,LMNB1,AATF,SENP2,PSME3,RPA2
GO:0002220	innate immune response activating cell surface receptor signaling pathway	1.449e-06	0.01048	7.259e-05	0.000687	23	107	RPS27A,CUL1,PSME4,BTRC,NRAS,CLEC7A,CHUK,PSMF1,PSMA1,PSMA2,PSMA6,PSMB2,PSMB5,PSMB7,PSMC4,PSMC5,PSMD3,PSMD7,PSMD11,PSME2,KRAS,PSME3,LYN
GO:0044772	mitotic cell cycle phase transition	1.455e-06	0.01053	7.259e-05	0.000687	68	529	RPS6KB1,MCM2,MCM3,MCM6,MCM7,CEP76,RPS27A,MCM10,RAB8A,CNOT6,AIF1,ANAPC5,LCMT1,CUL4B,CUL2,CUL1,CNOT11,APEX1,APP,SKP2,HAUS1,CDC23,BACH1,BCAT1,NBN,RCC2,NEK2,PSME4,ZPR1,BTRC,PIM2,CCNG1,CNOT9,CHEK2,CDC6,CDC25A,CDK4,ORC6,PHB2,TYMS,ANAPC1,PLAGL1,PSMF1,WEE1,ANAPC15,PPAT,PPP3CA,PPP6C,PRKDC,PSMA1,PSMA2,PSMA6,PSMB2,PSMB5,PSMB7,PSMC4,PSMC5,PSMD3,PSMD7,PSMD11,PSME2,DDX3X,ARID3A,CHMP4B,LMNB1,SENP2,PSME3,RPA2
GO:0071166	ribonucleoprotein complex localization	1.541e-06	0.01114	7.632e-05	0.0007223	25	123	SEH1L,THOC5,NOP58,NDC1,RBMX2,NUP133,CPSF3,NUP205,RNPS1,RRS1,SUPT6H,CPSF2,DDX19B,U2AF2,AGFG1,POLR2D,NUP93,PRPF31,NOL6,SLBP,RAN,UPF1,SDAD1,NMD3,DDX39A
GO:0006400	tRNA modification	1.562e-06	0.0113	7.672e-05	0.0007261	17	64	UBA5,NSUN4,TRMT1,PYURF,TRMT6,CDK5RAP1,SSB,DUS1L,MOCS3,DUS4L,MTO1,TRIT1,FTSJ1,NSUN2,THG1L,TRMT61B,ELP3
GO:0070199	establishment of protein localization to chromosome	1.57e-06	0.01135	7.672e-05	0.0007261	10	23	CCT7,CCT4,CCT2,CCT5,CCT8,RUVBL2,TCP1,NABP2,DKC1,PIH1D1
GO:0000154	rRNA modification	1.585e-06	0.01147	7.695e-05	0.0007283	11	28	FBL,MRM1,NSUN4,NOP56,PYURF,NOP58,FTSJ3,DIMT1,MRM2,DKC1,NAT10
GO:0032210	regulation of telomere maintenance via telomerase	1.649e-06	0.01193	7.952e-05	0.0007525	14	45	CCT7,CCT4,CCT2,MAPKAPK5,CCT5,CCT8,ATR,NEK2,TCP1,TERF2,CCT3,DKC1,PINX1,NAT10
GO:0051186	cofactor metabolic process	1.772e-06	0.01282	8.489e-05	0.0008033	56	409	GPHN,ACLY,MDH2,ME2,FECH,AHCY,ALDOA,MPI,THEM4,FAR2,MTHFD1,MTR,ATIC,COASY,MYC,AHCYL1,NCF2,COQ3,NDUFA9,SUCLG2,SUCLG1,SUCLA2,NFU1,STAT3,BLVRA,MOCS3,GPI,LIAS,HACD2,NFS1,TKT,QPRT,PDHA1,PDK1,PDK3,ACOT9,PGK1,TXNRD1,TYMS,SLC25A32,PKLR,PKM,PRDX5,MTHFD1L,IDH3B,CS,IREB2,NUDT12,CIAPIN1,DLAT,LDHA,LDHB,DERA,NAMPT,ENO1,COQ7
GO:0075525	viral translational termination-reinitiation	1.968e-06	0.01423	9.301e-05	0.0008803	5	5	EIF3L,EIF3A,EIF3B,EIF3D,EIF3G
GO:0048254	snoRNA localization	1.968e-06	0.01423	9.301e-05	0.0008803	5	5	FBL,NOP58,ZNHIT6,PRPF31,PIH1D1
GO:0034976	response to endoplasmic reticulum stress	2.058e-06	0.01488	9.665e-05	0.0009147	41	265	UBA5,LRRK2,BFAR,MBTPS2,CCL2,UBE2J1,SGTA,UFC1,EDEM3,ASNS,ATP2A2,DNAJB11,MBTPS1,ERP44,AUP1,FAF2,EIF2B5,MYDGF,OPA1,GSK3B,THBS1,AIFM1,PPP1R15B,HSP90B1,PARK7,PIK3R1,PMAIP1,CREB3L2,DERL1,XBP1,CTH,CXCL8,PSMC4,PSMC5,HM13,TMX1,CCDC47,UBXN8,TMEM33,EEF2,EIF2AK4
GO:0009119	ribonucleoside metabolic process	2.073e-06	0.015	9.675e-05	0.0009157	54	391	GPHN,ACPP,LRRK2,BPNT1,AHCY,ALDOA,UQCRHL,MPI,SLC25A33,NT5C2,COASY,ATP1B1,ATP5F1A,MYC,ATP5PB,ATP5MC1,ATP5PF,CMPK1,AHCYL1,NDUFA1,NDUFA9,NDUFAB1,NDUFB5,NDUFS1,STAT3,MOCS3,APOBEC3C,GPI,NFS1,ATP6V0A2,PARK7,PGK1,CTPS2,COX5A,HPRT1,PKLR,PKM,TJP2,UMPS,UQCRFS1,PMPCB,COX6A1,COX7B,COX7C,ATP5MF,CTPS1,IMPDH2,SLC35B2,COA6,LDHA,PPIF,NDUFAF1,ENO1,COQ7
GO:0002474	antigen processing and presentation of peptide antigen via MHC class I	2.13e-06	0.01541	9.875e-05	0.0009346	21	94	FCGR1A,SEC24A,NCF2,PSME4,CANX,PSMF1,CYBB,PSMA1,PSMA2,PSMA6,PSMB2,PSMB5,PSMB7,PSMC4,PSMC5,PSMD3,PSMD7,PSMD11,PSME2,ITGAV,PSME3
GO:0070202	regulation of establishment of protein localization to chromosome	2.336e-06	0.0169	0.0001065	0.001008	7	11	CCT7,CCT4,CCT2,CCT5,CCT8,TCP1,DKC1
GO:0051292	nuclear pore complex assembly	2.336e-06	0.0169	0.0001065	0.001008	7	11	NDC1,NUP205,AHCTF1,NUP93,TMEM170A,RTN4,TMEM33
GO:1990542	mitochondrial transmembrane transport	2.341e-06	0.01693	0.0001065	0.001008	16	59	TOMM40,TIMM44,SLC25A33,TIMM21,TIMM50,ATP5F1A,ATP5PB,ATP5MC1,ATP5PF,AFG3L2,PDCD5,HSPA4,ATP5MF,CPT2,TIMM10,TIMM9
GO:0006099	tricarboxylic acid cycle	2.39e-06	0.01729	0.000108	0.001022	11	29	ACO2,MDH2,FH,SDHD,SUCLG2,SUCLG1,SUCLA2,PDHA1,IDH3B,CS,DLAT
GO:0002758	innate immune response-activating signal transduction	2.415e-06	0.01747	0.0001082	0.001024	39	248	LGR4,RPS27A,TLR8,PIK3R4,WDFY1,CUL1,TBK1,PSME4,C1QBP,BTRC,NRAS,CD14,HSP90B1,DDX58,CLEC7A,CHUK,PSMF1,LSM14A,PUM1,CTSL,CTSS,ZC3HAV1,PSMA1,PSMA2,PSMA6,PSMB2,PSMB5,PSMB7,PSMC4,PSMC5,PSMD3,PSMD7,PSMD11,PSME2,MAPKAPK3,KRAS,ITCH,PSME3,LYN
GO:0006091	generation of precursor metabolites and energy	2.424e-06	0.01753	0.0001082	0.001024	54	393	ACADM,ACO2,ACOX1,RPS27A,MDH2,FECH,SCO1,FH,ALDOA,UQCRHL,SDHD,MPI,NOA1,SLC25A33,MYC,GBE1,NDUFA1,NDUFA9,SUCLG2,SUCLG1,NDUFAB1,SUCLA2,NDUFB5,NDUFS1,STAT3,GPI,GSK3B,OXA1L,GYG1,PDHA1,PARK7,PGK1,PHKA1,PNPT1,COX5A,PKLR,PKM,UQCRFS1,PMPCB,COX6A1,COX7B,COX7C,IDH3B,PPP1CC,CS,COA6,DLAT,FASTKD1,LDHA,PPIF,TRAP1,NDUFAF1,ENO1,COQ7
GO:0070200	establishment of protein localization to telomere	2.648e-06	0.01915	0.0001175	0.001112	8	15	CCT7,CCT4,CCT2,CCT5,CCT8,TCP1,NABP2,DKC1
GO:0098781	ncRNA transcription	2.725e-06	0.01971	0.0001198	0.001134	22	103	MARS,SNAPC5,INTS2,POLR1B,NIFK,INTS13,INTS9,NCL,TAF8,TAF5,TAF13,INTS5,GTF3A,GTF3C1,GTF3C2,POLR1E,NABP2,POLR1A,POLR2D,NOL11,PIH1D1,GTF3C6
GO:1901575	organic substance catabolic process	2.733e-06	0.01977	0.0001198	0.001134	187	1910	CLPP,RPL29,ABAT,ZMPSTE24,ACADM,PNPLA4,ACOX1,RPS8,ETF1,LRRK2,UBAP1,BFAR,RPS23,RPS25,RPS27A,CNOT6,PIK3R4,FAH,AHCY,LYPLA1,SCO1,ALDH1B1,ALDOA,ANAPC5,LCMT1,MPI,CUL4B,CUL2,CUL1,UBE2J1,CNOT11,XRN2,TRIB2,DCPS,LIN28B,USP28,SGTA,ERI1,SKP2,DIS3,GDE1,MSN,EDEM3,KLHL15,NT5C2,SMARCC1,FUCA1,FUCA2,FUT1,BECN1,CDC23,MYC,AUP1,ADAM9,PABPC4,BCAT1,NCF2,BCKDHB,CLPX,STAT3,BLVRA,FAF2,PSME4,RNPS1,SUPV3L1,ZPR1,GLO1,GLS,PRPF…
GO:0032392	DNA geometric change	2.982e-06	0.02157	0.0001299	0.00123	19	81	MCM2,MCM3,MCM6,MCM7,RPS27A,CUL4B,CHD8,RUVBL1,GINS2,NBN,RUVBL2,SUPV3L1,GTF2H1,CHD1,CHD4,HMGA1,XRCC5,DDX3X,G3BP1
GO:0002181	cytoplasmic translation	3.475e-06	0.02514	0.0001503	0.001422	15	54	RPL29,EIF3M,EIF3A,EIF3B,EIF3D,SSB,CDC123,EIF4H,FTSJ1,PTBP1,MRPL2,EEF2,EIF2D,MRTO4,RPL9
GO:0051168	nuclear export	3.491e-06	0.02525	0.0001503	0.001422	32	188	SEH1L,ADAR,XPO5,CTDSPL2,THOC5,NDC1,RBMX2,NUP133,CPSF3,AHCYL1,NUP205,RNPS1,RRS1,SUPT6H,CPSF2,XPO4,GSK3B,DDX19B,PARK7,U2AF2,TXN,AGFG1,POLR2D,NUP93,NOL6,PTPN11,SLBP,RAN,UPF1,SDAD1,NMD3,DDX39A
GO:0017148	negative regulation of translation	3.528e-06	0.02552	0.000151	0.001429	27	145	RIDA,ADAR,CNOT6,XPO5,SYNCRIP,LIN28B,IGF2BP1,IGF2BP3,STAT3,EIF2B3,EIF2B5,DICER1,CNOT9,CIRBP,PRKCA,PUM1,ILF3,EIF3E,PAIP2B,IREB2,DDX3X,RAN,RBM3,UPF1,EIF4EBP2,EIF2AK4,HNRNPR
GO:0034502	protein localization to chromosome	3.778e-06	0.02733	0.0001607	0.001521	16	61	CCT7,CCT4,CCT2,CCT5,CCT8,ATR,RUVBL2,RCC2,TCP1,TERF2,NABP2,SPDL1,DKC1,PINX1,PIH1D1,GNL3
GO:0032259	methylation	3.828e-06	0.02769	0.0001619	0.001532	49	349	FBL,MRM1,ETF1,PRMT5,AHCY,LCMT1,NSUN4,TYW3,TRMT1,PYURF,METTL13,TRMT6,DPH5,MTR,WDR82,FTSJ3,RNMT,CMTR1,COQ3,DIMT1,SUPT6H,DPY30,NOP2,WDR5,GSK3B,PWP1,CARNMT1,MTA2,TYMS,GSTO1,WDR77,METTL7A,METTL22,MRM2,XBP1,VIRMA,CTR9,ILF3,FTSJ1,NSUN2,SMYD2,FAM103A1,CIAPIN1,TRMT61B,PIH1D1,ARMT1,PCMTD2,PRMT3,SMAD4
GO:0006839	mitochondrial transport	4.202e-06	0.0304	0.0001767	0.001672	42	282	LRRK2,TOMM5,MIPEP,PARL,TOMM40,TIMM44,SLC25A5,SLC25A6,SLC25A33,THEM4,RUVBL1,TIMM21,TIMM50,ATP5F1A,ATP5PB,ATP5MC1,ATP5PF,WBP11,STAT3,PMPCA,AFG3L2,NMT1,GSK3B,POLR3A,PDCD5,U2AF2,SLC25A32,PNPT1,UGCG,HSPA4,PMAIP1,VDAC1,BAG4,ATP5MF,CPT2,PSMB7,STARD7,TOMM70,PPIF,TIMM10,TIMM9,RHOT1
GO:0002218	activation of innate immune response	5.296e-06	0.03831	0.0002214	0.002095	39	256	LGR4,RPS27A,TLR8,PIK3R4,WDFY1,CUL1,TBK1,PSME4,C1QBP,BTRC,NRAS,CD14,HSP90B1,DDX58,CLEC7A,CHUK,PSMF1,LSM14A,PUM1,CTSL,CTSS,ZC3HAV1,PSMA1,PSMA2,PSMA6,PSMB2,PSMB5,PSMB7,PSMC4,PSMC5,PSMD3,PSMD7,PSMD11,PSME2,MAPKAPK3,KRAS,ITCH,PSME3,LYN
GO:0006984	ER-nucleus signaling pathway	5.54e-06	0.04007	0.0002297	0.002174	13	43	MBTPS2,CCL2,ASNS,ATP2A2,MBTPS1,GSK3B,PPP1R15B,HSP90B1,XBP1,CXCL8,CCDC47,TMEM33,EIF2A
GO:0006605	protein targeting	5.56e-06	0.04022	0.0002297	0.002174	84	723	RPL29,RPS8,LRRK2,RPS23,RPS25,RPS27A,TOMM5,ADAR,PIK3R4,MIPEP,PARL,CCL2,TOMM40,TIMM44,IPO8,IPO7,SLC25A6,TRAPPC8,AP3M1,RBM22,NOP58,RUVBL1,TIMM21,TIMM50,NUP133,BECN1,MBTPS1,WBP11,SRP19,SRP68,SRP72,STAT3,NUP205,PMPCA,ZPR1,AFG3L2,VAMP7,RGPD2,CBLB,GSK3B,POLR3A,CDC37,TGFBR1,THRA,PDCD5,PRDX1,TNPO3,DDX58,PHB2,PEX12,U2AF2,KPNA6,TXN,PIK3R1,UGCG,MIEF1,HSPA4,HSP90AB1,BAG4,XBP1,MAPK14,PPP3CA,GCC2,NUP93,PSMB7,ST…
GO:0000723	telomere maintenance	5.589e-06	0.04043	0.0002297	0.002174	26	140	ERCC4,APEX1,CCT7,CCT4,CCT2,MAPKAPK5,CCT5,CCT8,MYC,DHX36,ATR,NBN,NEK2,TCP1,TERF2,CCT3,NABP2,XRCC5,PRKDC,DKC1,PINX1,GNL3,UPF1,RFC2,NAT10,RPA2
GO:0006753	nucleoside phosphate metabolic process	5.865e-06	0.04242	0.0002397	0.002268	82	702	GPHN,ACPP,LRRK2,MDH2,ME2,ADCY7,BPNT1,ALDOA,UQCRHL,MPI,SLC25A33,PAICS,MTHFD1,NT5C2,ATIC,COASY,ATP1B1,ATP5F1A,MYC,ATP5PB,ATP5MC1,ATP5PF,CMPK1,NCF2,NDUFA1,NDUFA9,SUCLG1,NDUFAB1,NDUFB5,NDUFS1,STAT3,MOCS3,GPI,NFS1,CBS,THBS1,TKT,QPRT,ATP6V0A2,PDE3B,PDHA1,PARK7,PFAS,PGK1,TXNRD1,TYMS,CTPS2,COX5A,HPRT1,PKLR,PKM,TJP2,UMPS,UQCRFS1,PRDX5,DCTPP1,PMPCB,COX6A1,COX7B,COX7C,ATP5MF,IDH3B,PPAT,PRKCA,CTPS1,PRPSAP2,I…
GO:1904356	regulation of telomere maintenance via telomere lengthening	6.618e-06	0.04787	0.0002689	0.002545	14	50	CCT7,CCT4,CCT2,MAPKAPK5,CCT5,CCT8,ATR,NEK2,TCP1,TERF2,CCT3,DKC1,PINX1,NAT10
GO:0031397	negative regulation of protein ubiquitination	6.736e-06	0.04873	0.0002722	0.002576	25	133	RPS27A,ANAPC5,CDC23,GTPBP4,PARK7,TRIP12,ANAPC1,PSMF1,ANAPC15,PSMA1,PSMA2,PSMA6,PSMB2,PSMB5,PSMB7,PSMC4,PSMC5,PSMD3,PSMD7,PSMD11,PSME2,PINX1,SENP2,PRMT3,PSME3
GO:0032212	positive regulation of telomere maintenance via telomerase	7.305e-06	0.05283	0.000292	0.002764	11	32	CCT7,CCT4,CCT2,MAPKAPK5,CCT5,CCT8,ATR,NEK2,TCP1,CCT3,DKC1
GO:0050821	protein stabilization	7.308e-06	0.05286	0.000292	0.002764	26	142	ZSWIM7,NAA15,CCT7,CCT4,CCT2,CCT5,CCT8,ATP1B1,NLK,NCKAP1,PIM2,TCP1,CDC37,CHEK2,GTPBP4,CCT3,PARK7,PHB2,PFN1,PHB,PIK3R1,HSP90AB1,BAG3,PPIB,LAMP1,LAMP2
GO:0009156	ribonucleoside monophosphate biosynthetic process	7.643e-06	0.05528	0.0003018	0.002856	19	86	ALDOA,PAICS,ATIC,ATP5F1A,MYC,ATP5PB,ATP5MC1,ATP5PF,CMPK1,STAT3,ATP6V0A2,PFAS,HPRT1,PKLR,PKM,UMPS,ATP5MF,PPAT,IMPDH2
GO:1901990	regulation of mitotic cell cycle phase transition	7.649e-06	0.05532	0.0003018	0.002856	45	318	RPS27A,CNOT6,AIF1,ANAPC5,LCMT1,CUL4B,CUL1,CNOT11,APEX1,APP,CDC23,BCAT1,NBN,RCC2,PSME4,BTRC,CCNG1,CNOT9,CHEK2,CDC6,CDK4,PHB2,ANAPC1,PLAGL1,PSMF1,ANAPC15,PRKDC,PSMA1,PSMA2,PSMA6,PSMB2,PSMB5,PSMB7,PSMC4,PSMC5,PSMD3,PSMD7,PSMD11,PSME2,DDX3X,ARID3A,LMNB1,SENP2,PSME3,RPA2
GO:0072350	tricarboxylic acid metabolic process	7.678e-06	0.05554	0.0003018	0.002856	12	38	ACLY,ACO2,MDH2,FH,SDHD,SUCLG2,SUCLG1,SUCLA2,PDHA1,IDH3B,CS,DLAT
GO:0051052	regulation of DNA metabolic process	7.777e-06	0.05625	0.000304	0.002877	50	368	ERCC4,ABRAXAS1,PRMT5,APEX1,CCT7,CCT4,CCT2,MAPKAPK5,CCT5,PPP4R2,CCT8,MYC,DHX36,ATR,NBN,NEK2,SUPT6H,TCP1,TERF2,GSK3B,MSH6,AIFM1,CHEK2,CDC6,GTPBP4,CCT3,PFN1,TRIP12,ERCC8,NABP2,APOBEC3D,BRCC3,XRCC5,IGF1R,ZNF91,CXCL8,SMARCAD1,CHTF8,DFFA,TIPIN,DKC1,PINX1,GNL3,RBBP6,EXOSC3,RFC2,GMNN,NAT10,SENP2,RPA2
GO:0055086	nucleobase-containing small molecule metabolic process	7.924e-06	0.05731	0.0003081	0.002916	87	763	GPHN,ACPP,LRRK2,MDH2,ME2,ADCY7,BPNT1,AHCY,ALDOA,UQCRHL,MPI,SLC25A33,PAICS,MTHFD1,NT5C2,ATIC,COASY,ATP1B1,ATP5F1A,MYC,ATP5PB,ATP5MC1,ATP5PF,CMPK1,AHCYL1,NCF2,NDUFA1,NDUFA9,SUCLG1,NDUFAB1,NDUFB5,NDUFS1,STAT3,MOCS3,APOBEC3C,GPI,NFS1,CBS,GSR,THBS1,TKT,QPRT,ATP6V0A2,PDE3B,PDHA1,PARK7,PFAS,PGK1,TXN,TXNRD1,TYMS,CTPS2,COX5A,HPRT1,PKLR,PKM,TJP2,UMPS,UQCRFS1,PRDX5,DCTPP1,PMPCB,COX6A1,COX7B,COX7C,ATP5MF,IDH…
GO:0009124	nucleoside monophosphate biosynthetic process	8.133e-06	0.05883	0.0003146	0.002977	20	94	ALDOA,PAICS,ATIC,ATP5F1A,MYC,ATP5PB,ATP5MC1,ATP5PF,CMPK1,STAT3,ATP6V0A2,PFAS,TYMS,HPRT1,PKLR,PKM,UMPS,ATP5MF,PPAT,IMPDH2
GO:0002183	cytoplasmic translational initiation	8.79e-06	0.06358	0.0003382	0.0032	8	17	EIF3M,EIF3A,EIF3B,EIF3D,SSB,CDC123,PTBP1,EIF2D
GO:0001510	RNA methylation	9.119e-06	0.06596	0.000349	0.003303	15	58	FBL,MRM1,NSUN4,TRMT1,PYURF,TRMT6,FTSJ3,RNMT,CMTR1,DIMT1,MRM2,VIRMA,FTSJ1,NSUN2,TRMT61B
GO:0015931	nucleobase-containing compound transport	9.255e-06	0.06694	0.0003523	0.003334	34	215	SEH1L,XPO5,SLC25A6,SLC25A33,THOC5,IGF2BP1,IGF2BP3,NDC1,RBMX2,NUP133,CPSF3,NUP205,RNPS1,SUPT6H,CPSF2,RGPD2,SLC35B4,DDX19B,U2AF2,PNPT1,AGFG1,AHCTF1,POLR2D,NUP93,NOL6,SLC35B2,SLBP,RAN,UPF1,LRPPRC,SLC25A36,SENP2,DDX39A,SLC29A1
GO:0046128	purine ribonucleoside metabolic process	9.821e-06	0.07104	0.0003719	0.00352	49	361	GPHN,ACPP,LRRK2,BPNT1,AHCY,ALDOA,UQCRHL,MPI,SLC25A33,NT5C2,COASY,ATP1B1,ATP5F1A,MYC,ATP5PB,ATP5MC1,ATP5PF,AHCYL1,NDUFA1,NDUFA9,NDUFAB1,NDUFB5,NDUFS1,STAT3,MOCS3,GPI,NFS1,ATP6V0A2,PARK7,PGK1,COX5A,HPRT1,PKLR,PKM,TJP2,UQCRFS1,PMPCB,COX6A1,COX7B,COX7C,ATP5MF,IMPDH2,SLC35B2,COA6,LDHA,PPIF,NDUFAF1,ENO1,COQ7
GO:0009205	purine ribonucleoside triphosphate metabolic process	1.015e-05	0.07342	0.0003824	0.003619	39	263	GPHN,LRRK2,ALDOA,UQCRHL,MPI,SLC25A33,ATP1B1,ATP5F1A,MYC,ATP5PB,ATP5MC1,ATP5PF,NDUFA1,NDUFA9,NDUFAB1,NDUFB5,NDUFS1,STAT3,MOCS3,GPI,NFS1,ATP6V0A2,PARK7,PGK1,COX5A,PKLR,PKM,UQCRFS1,PMPCB,COX6A1,COX7B,COX7C,ATP5MF,COA6,LDHA,PPIF,NDUFAF1,ENO1,COQ7
GO:1904358	positive regulation of telomere maintenance via telomere lengthening	1.025e-05	0.07417	0.0003843	0.003637	11	33	CCT7,CCT4,CCT2,MAPKAPK5,CCT5,CCT8,ATR,NEK2,TCP1,CCT3,DKC1
GO:0000387	spliceosomal snRNP assembly	1.038e-05	0.07505	0.0003869	0.003661	12	39	PRMT5,RBM22,SMN2,SNRPC,SNRPD1,SNRPF,PRPF19,CLNS1A,WDR77,GEMIN5,PRPF31,GEMIN7
GO:0006461	protein complex assembly	1.057e-05	0.07644	0.0003899	0.00369	155	1562	CLPP,GPHN,MKKS,CHAF1B,ERCC4,ACADM,MAX,LRRK2,IMPACT,MCM2,TIMMDC1,NUFIP1,KCTD6,MGST1,SCO1,AIF1,MMP9,FH,ALDOA,UQCRHL,LCMT1,CUL4B,SGK1,SLC25A33,ANXA5,CCT2,APP,SKIL,MSN,NIFK,NDC1,RUVBL1,TIMM21,HAUS1,PSMG1,COA1,CCT8,TRAPPC2L,MYC,NCKAP1,IQGAP2,SEC24A,TMEM126B,SNAP23,NDUFA1,TUBGCP2,TUBGCP4,NDUFA9,NDUFAB1,NDUFB5,NDUFS1,NUP205,NEK2,GLS,AFG3L2,VAMP7,SKAP2,TBCE,TCP1,GRB2,OAT,COX18,NFS1,SLC7A6,TFAM,DICER1,GSK…
GO:0070271	protein complex biogenesis	1.057e-05	0.07644	0.0003899	0.00369	155	1562	CLPP,GPHN,MKKS,CHAF1B,ERCC4,ACADM,MAX,LRRK2,IMPACT,MCM2,TIMMDC1,NUFIP1,KCTD6,MGST1,SCO1,AIF1,MMP9,FH,ALDOA,UQCRHL,LCMT1,CUL4B,SGK1,SLC25A33,ANXA5,CCT2,APP,SKIL,MSN,NIFK,NDC1,RUVBL1,TIMM21,HAUS1,PSMG1,COA1,CCT8,TRAPPC2L,MYC,NCKAP1,IQGAP2,SEC24A,TMEM126B,SNAP23,NDUFA1,TUBGCP2,TUBGCP4,NDUFA9,NDUFAB1,NDUFB5,NDUFS1,NUP205,NEK2,GLS,AFG3L2,VAMP7,SKAP2,TBCE,TCP1,GRB2,OAT,COX18,NFS1,SLC7A6,TFAM,DICER1,GSK…
GO:0000479	endonucleolytic cleavage of tricistronic rRNA transcript (SSU-rRNA, 5.8S rRNA, LSU-rRNA)	1.07e-05	0.07737	0.0003899	0.00369	7	13	NOP14,TSR1,RRS1,UTP20,BMS1,NOL9,FCF1
GO:1903052	positive regulation of proteolysis involved in cellular protein catabolic process	1.072e-05	0.07751	0.0003899	0.00369	30	180	LRRK2,RPS27A,ANAPC5,CUL1,TRIB2,SGTA,CDC23,PSME4,BTRC,GSK3B,CTSC,ANAPC1,PSMF1,RCHY1,ANAPC15,XBP1,PSMA1,PSMA2,PSMA6,PSMB2,PSMB5,PSMB7,PSMC4,PSMC5,PSMD3,PSMD7,PSMD11,PSME2,KEAP1,PSME3
GO:0031398	positive regulation of protein ubiquitination	1.073e-05	0.07759	0.0003899	0.00369	31	189	LRRK2,RPS27A,ANAPC5,CUL1,TRIB2,DCUN1D5,SKP2,CDC23,PSME4,BTRC,UBE3A,ANAPC1,PSMF1,DERL1,RCHY1,ANAPC15,CTR9,PSMA1,PSMA2,PSMA6,PSMB2,PSMB5,PSMB7,PSMC4,PSMC5,PSMD3,PSMD7,PSMD11,PSME2,SENP2,PSME3
GO:0071426	ribonucleoprotein complex export from nucleus	1.114e-05	0.08054	0.0004007	0.003792	23	120	SEH1L,THOC5,NDC1,RBMX2,NUP133,CPSF3,NUP205,RNPS1,RRS1,SUPT6H,CPSF2,DDX19B,U2AF2,AGFG1,POLR2D,NUP93,NOL6,SLBP,RAN,UPF1,SDAD1,NMD3,DDX39A
GO:0031123	RNA 3'-end processing	1.114e-05	0.08054	0.0004007	0.003792	23	120	FBL,ELAC1,LIN28B,ERI1,APP,THOC5,CPSF3,AHCYL1,RNPS1,SUPV3L1,CPSF2,GRSF1,U2AF2,EXOSC8,ELAC2,PNPT1,EXOSC9,POLR2D,CTR9,DKC1,SLBP,EXOSC3,DDX39A
GO:0034249	negative regulation of cellular amide metabolic process	1.131e-05	0.08183	0.0004047	0.00383	27	154	RIDA,ADAR,CNOT6,XPO5,SYNCRIP,LIN28B,IGF2BP1,IGF2BP3,STAT3,EIF2B3,EIF2B5,DICER1,CNOT9,CIRBP,PRKCA,PUM1,ILF3,EIF3E,PAIP2B,IREB2,DDX3X,RAN,RBM3,UPF1,EIF4EBP2,EIF2AK4,HNRNPR
GO:0006521	regulation of cellular amino acid metabolic process	1.136e-05	0.08215	0.0004047	0.00383	16	66	PSME4,PARK7,PSMF1,PSMA1,PSMA2,PSMA6,PSMB2,PSMB5,PSMB7,PSMC4,PSMC5,PSMD3,PSMD7,PSMD11,PSME2,PSME3
GO:0042278	purine nucleoside metabolic process	1.231e-05	0.08902	0.0004364	0.00413	49	364	GPHN,ACPP,LRRK2,BPNT1,AHCY,ALDOA,UQCRHL,MPI,SLC25A33,NT5C2,COASY,ATP1B1,ATP5F1A,MYC,ATP5PB,ATP5MC1,ATP5PF,AHCYL1,NDUFA1,NDUFA9,NDUFAB1,NDUFB5,NDUFS1,STAT3,MOCS3,GPI,NFS1,ATP6V0A2,PARK7,PGK1,COX5A,HPRT1,PKLR,PKM,TJP2,UQCRFS1,PMPCB,COX6A1,COX7B,COX7C,ATP5MF,IMPDH2,SLC35B2,COA6,LDHA,PPIF,NDUFAF1,ENO1,COQ7
GO:0044257	cellular protein catabolic process	1.239e-05	0.08959	0.000437	0.004136	80	694	CLPP,ZMPSTE24,LRRK2,UBAP1,BFAR,RPS27A,SCO1,ANAPC5,LCMT1,CUL4B,CUL2,CUL1,UBE2J1,TRIB2,USP28,SGTA,SKP2,MSN,EDEM3,KLHL15,SMARCC1,CDC23,AUP1,CLPX,FAF2,PSME4,PRPF19,HERC2,BTRC,USP22,CBL,GSK3B,CCNF,USP10,CHEK2,HSP90B1,CTSC,PARK7,TRIP12,ERCC8,UBA1,UBE3A,ANAPC1,UCHL3,PMAIP1,HSP90AB1,PSMF1,DERL1,RCHY1,ANAPC15,XBP1,CTSA,DZIP3,CTSL,CTSS,PSMA1,PSMA2,PSMA6,PSMB2,PSMB5,PSMB7,FBXL12,PSMC4,PSMC5,PSMD3,PSMD7,PSMD…
GO:0031647	regulation of protein stability	1.284e-05	0.09289	0.0004509	0.004267	36	237	ZSWIM7,NAA15,USP28,CCT7,CCT4,CCT2,CCT5,CCT8,ATP1B1,NLK,NCKAP1,BTRC,PIM2,TCP1,CDC37,CHEK2,GTPBP4,CCT3,PARK7,PHB2,PFN1,PHB,PIK3R1,HSP90AB1,DERL1,BAG3,XBP1,CTSA,PPIB,PRKDC,PINX1,KRAS,LAMP1,LAMP2,SENP2,QRSL1
GO:0051603	proteolysis involved in cellular protein catabolic process	1.312e-05	0.09486	0.0004557	0.004312	77	662	CLPP,ZMPSTE24,LRRK2,UBAP1,BFAR,RPS27A,SCO1,ANAPC5,LCMT1,CUL4B,CUL2,CUL1,UBE2J1,TRIB2,USP28,SGTA,SKP2,EDEM3,KLHL15,SMARCC1,CDC23,AUP1,CLPX,FAF2,PSME4,PRPF19,HERC2,BTRC,USP22,CBL,GSK3B,CCNF,USP10,HSP90B1,CTSC,PARK7,TRIP12,ERCC8,UBA1,UBE3A,ANAPC1,UCHL3,PMAIP1,HSP90AB1,PSMF1,DERL1,RCHY1,ANAPC15,XBP1,CTSA,DZIP3,CTSL,CTSS,PSMA1,PSMA2,PSMA6,PSMB2,PSMB5,PSMB7,FBXL12,PSMC4,PSMC5,PSMD3,PSMD7,PSMD11,PSME2,K…
GO:0009168	purine ribonucleoside monophosphate biosynthetic process	1.317e-05	0.09524	0.0004557	0.004312	17	74	ALDOA,PAICS,ATIC,ATP5F1A,MYC,ATP5PB,ATP5MC1,ATP5PF,STAT3,ATP6V0A2,PFAS,HPRT1,PKLR,PKM,ATP5MF,PPAT,IMPDH2
GO:0009127	purine nucleoside monophosphate biosynthetic process	1.317e-05	0.09524	0.0004557	0.004312	17	74	ALDOA,PAICS,ATIC,ATP5F1A,MYC,ATP5PB,ATP5MC1,ATP5PF,STAT3,ATP6V0A2,PFAS,HPRT1,PKLR,PKM,ATP5MF,PPAT,IMPDH2
GO:0019884	antigen processing and presentation of exogenous antigen	1.334e-05	0.09647	0.0004594	0.004347	29	173	FCGR1A,OSBPL1A,DCTN5,SEC24A,NCF2,PSME4,AP3D1,CANX,CD1C,CLTA,PSMF1,CTSL,CTSS,CYBB,PSMA1,PSMA2,PSMA6,PSMB2,PSMB5,PSMB7,PSMC4,PSMC5,PSMD3,PSMD7,PSMD11,PSME2,ITGAV,RAB7A,PSME3
GO:0000082	G1/S transition of mitotic cell cycle	1.348e-05	0.09749	0.000462	0.004373	37	247	RPS6KB1,MCM2,MCM3,MCM6,MCM7,RPS27A,MCM10,CNOT6,AIF1,CUL4B,CUL2,CUL1,CNOT11,APEX1,SKP2,BACH1,BCAT1,ZPR1,PIM2,CNOT9,CHEK2,CDC6,CDC25A,CDK4,ORC6,TYMS,PLAGL1,PPAT,PPP3CA,PPP6C,PRKDC,PSME2,DDX3X,ARID3A,SENP2,PSME3,RPA2
GO:0015980	energy derivation by oxidation of organic compounds	1.398e-05	0.1012	0.0004766	0.00451	41	286	ACADM,ACO2,RPS27A,MDH2,FH,UQCRHL,SDHD,NOA1,MYC,GBE1,NDUFA1,NDUFA9,SUCLG2,SUCLG1,NDUFAB1,SUCLA2,NDUFB5,NDUFS1,GSK3B,OXA1L,GYG1,PDHA1,PARK7,PHKA1,PNPT1,COX5A,UQCRFS1,PMPCB,COX6A1,COX7B,COX7C,IDH3B,PPP1CC,CS,COA6,DLAT,FASTKD1,LDHA,TRAP1,NDUFAF1,COQ7
GO:0044843	cell cycle G1/S phase transition	1.403e-05	0.1015	0.0004766	0.00451	38	257	RPS6KB1,MCM2,MCM3,MCM6,MCM7,RPS27A,MCM10,CNOT6,AIF1,CUL4B,CUL2,CUL1,CNOT11,APEX1,SKP2,BACH1,BCAT1,ZPR1,PIM2,CNOT9,CHEK2,CDC6,CDC25A,CDK4,ORC6,PHB2,TYMS,PLAGL1,PPAT,PPP3CA,PPP6C,PRKDC,PSME2,DDX3X,ARID3A,SENP2,PSME3,RPA2
GO:0006260	DNA replication	1.452e-05	0.105	0.0004907	0.004644	47	346	CHAF1B,MCMBP,MCM2,MCM3,MCM6,MCM7,MCM10,SLC25A33,CCT7,CCT4,CCT2,FANCM,MAPKAPK5,CCT5,CCT8,GINS2,ATR,NBN,SSRP1,NEK2,ZPR1,TIMELESS,TCP1,TERF2,TFAM,SUPT16H,CHEK2,CDC6,CDC25A,GTPBP4,CCT3,ORC6,HMGA1,NABP2,IGF1R,CHTF8,TIPIN,DKC1,PINX1,SLBP,RBBP6,UPF1,RFC2,GMNN,NAT10,SENP2,RPA2
GO:1901987	regulation of cell cycle phase transition	1.699e-05	0.1229	0.0005716	0.005409	46	338	RPS27A,CNOT6,AIF1,ANAPC5,LCMT1,CUL4B,CUL1,CNOT11,APEX1,APP,CDC23,BCAT1,NBN,RCC2,PSME4,PRPF19,BTRC,CCNG1,CNOT9,CHEK2,CDC6,CDK4,PHB2,ANAPC1,PLAGL1,PSMF1,ANAPC15,PRKDC,PSMA1,PSMA2,PSMA6,PSMB2,PSMB5,PSMB7,PSMC4,PSMC5,PSMD3,PSMD7,PSMD11,PSME2,DDX3X,ARID3A,LMNB1,SENP2,PSME3,RPA2
GO:1903364	positive regulation of cellular protein catabolic process	1.83e-05	0.1324	0.0006104	0.005776	31	194	LRRK2,RPS27A,ANAPC5,CUL1,TRIB2,SGTA,MSN,CDC23,PSME4,BTRC,GSK3B,CTSC,ANAPC1,PSMF1,RCHY1,ANAPC15,XBP1,PSMA1,PSMA2,PSMA6,PSMB2,PSMB5,PSMB7,PSMC4,PSMC5,PSMD3,PSMD7,PSMD11,PSME2,KEAP1,PSME3
GO:0006733	oxidoreduction coenzyme metabolic process	1.831e-05	0.1325	0.0006104	0.005776	27	158	MDH2,ME2,ALDOA,MPI,MYC,NCF2,COQ3,NDUFA9,STAT3,GPI,TKT,QPRT,PDHA1,PGK1,TXNRD1,PKLR,PKM,PRDX5,IDH3B,NUDT12,DLAT,LDHA,LDHB,DERA,NAMPT,ENO1,COQ7
GO:0090503	RNA phosphodiester bond hydrolysis, exonucleolytic	1.936e-05	0.1401	0.0006425	0.00608	11	35	CNOT6,XRN2,DCPS,ERI1,DIS3,PDE12,EXOSC8,PNPT1,EXOSC9,EXOSC3,ISG20L2
GO:0009117	nucleotide metabolic process	1.982e-05	0.1434	0.0006547	0.006196	79	692	GPHN,ACPP,LRRK2,MDH2,ME2,ADCY7,BPNT1,ALDOA,UQCRHL,MPI,SLC25A33,PAICS,MTHFD1,NT5C2,ATIC,COASY,ATP1B1,ATP5F1A,MYC,ATP5PB,ATP5MC1,ATP5PF,CMPK1,NCF2,NDUFA1,NDUFA9,NDUFAB1,NDUFB5,NDUFS1,STAT3,MOCS3,GPI,NFS1,CBS,THBS1,TKT,QPRT,ATP6V0A2,PDE3B,PDHA1,PARK7,PFAS,PGK1,TXNRD1,TYMS,CTPS2,COX5A,HPRT1,PKLR,PKM,TJP2,UMPS,UQCRFS1,PRDX5,PMPCB,COX6A1,COX7B,COX7C,ATP5MF,IDH3B,PPAT,PRKCA,CTPS1,PRPSAP2,IMPDH2,SLC35B2,…
GO:0009144	purine nucleoside triphosphate metabolic process	2.053e-05	0.1485	0.000675	0.006388	39	271	GPHN,LRRK2,ALDOA,UQCRHL,MPI,SLC25A33,ATP1B1,ATP5F1A,MYC,ATP5PB,ATP5MC1,ATP5PF,NDUFA1,NDUFA9,NDUFAB1,NDUFB5,NDUFS1,STAT3,MOCS3,GPI,NFS1,ATP6V0A2,PARK7,PGK1,COX5A,PKLR,PKM,UQCRFS1,PMPCB,COX6A1,COX7B,COX7C,ATP5MF,COA6,LDHA,PPIF,NDUFAF1,ENO1,COQ7
GO:0000463	maturation of LSU-rRNA from tricistronic rRNA transcript (SSU-rRNA, 5.8S rRNA, LSU-rRNA)	2.108e-05	0.1525	0.0006879	0.00651	6	10	RPF2,WDR12,FTSJ3,PES1,GTPBP4,NOL9
GO:0017038	protein import	2.111e-05	0.1527	0.0006879	0.00651	47	351	ADAR,TOMM40,TIMM44,IPO8,IPO7,RBM22,NOP58,TIMM21,TIMM50,NUP133,MBTPS1,HNRNPM,STAT3,NUP205,ZPR1,AFG3L2,RGPD2,CBLB,GSK3B,TGFBR1,THRA,PDCD5,PRDX1,TNPO3,DDX58,PHB2,PEX12,KPNA6,TXN,PIK3R1,HSPA4,HSP90AB1,XBP1,MAPK14,PPP3CA,NUP93,KEAP1,KPNB1,KPNA4,TNPO1,IPO5,RAN,LAMP2,TIMM10,TIMM9,SMAD4,IPO11
GO:2000573	positive regulation of DNA biosynthetic process	2.178e-05	0.1575	0.0007063	0.006684	15	62	CCT7,CCT4,CCT2,MAPKAPK5,CCT5,CCT8,MYC,ATR,NEK2,TCP1,GSK3B,CCT3,CHTF8,DKC1,RFC2
GO:0038095	Fc-epsilon receptor signaling pathway	2.192e-05	0.1585	0.0007078	0.006698	25	142	RPS27A,CUL1,PSME4,BTRC,NRAS,GRB2,CHUK,PIK3R1,PSMF1,PPP3CA,PSMA1,PSMA2,PSMA6,PSMB2,PSMB5,PSMB7,PSMC4,PSMC5,PSMD3,PSMD7,PSMD11,PSME2,KRAS,PSME3,LYN
GO:0043632	modification-dependent macromolecule catabolic process	2.232e-05	0.1615	0.0007176	0.006791	71	606	ZMPSTE24,LRRK2,UBAP1,BFAR,RPS27A,ANAPC5,LCMT1,CUL4B,CUL2,CUL1,UBE2J1,TRIB2,USP28,SGTA,SKP2,EDEM3,KLHL15,SMARCC1,CDC23,AUP1,FAF2,PSME4,HERC2,BTRC,USP22,CBL,GSK3B,CCNF,USP10,HSP90B1,PARK7,EXOSC8,TRIP12,ERCC8,PNPT1,UBA1,UBE3A,ANAPC1,UCHL3,HSP90AB1,EXOSC9,PSMF1,DERL1,RCHY1,ANAPC15,XBP1,DZIP3,PSMA1,PSMA2,PSMA6,PSMB2,PSMB5,PSMB7,FBXL12,PSMC4,PSMC5,PSMD3,PSMD7,PSMD11,PSME2,KEAP1,OTUD7B,CCDC47,ITCH,RBBP6…
GO:0051276	chromosome organization	2.249e-05	0.1626	0.0007196	0.00681	122	1189	SEH1L,CHAF1B,MCMBP,ERCC4,FBL,MCM2,MCM3,SKA2,MCM6,MCM7,RPS27A,SAFB,ABRAXAS1,PRMT5,LCMT1,CUL4B,APEX1,CCT7,CCT4,CHD8,CCT2,CHD7,MAPKAPK5,NDC1,RUVBL1,CCT5,NUP133,HLTF,CCT8,SMARCC1,NCOA1,CENPV,GINS2,WDR82,CCNB1IP1,BECN1,NUDC,CDC23,MYC,DHX36,ATR,MEIOB,NBN,SRPK1,RUVBL2,RCC2,NEK2,PSME4,SUPT4H1,RRS1,SUPT6H,SUPV3L1,DPY30,TAF5,TAF12,COPS6,USP22,TCP1,BAZ1B,WDR5,TERF2,DICER1,PWP1,MSH6,GTF2H1,AIFM1,ACTR6,SUPT16…
GO:1903322	positive regulation of protein modification by small protein conjugation or removal	2.422e-05	0.1752	0.0007682	0.00727	32	206	LRRK2,RPS27A,ANAPC5,CUL1,TRIB2,DCUN1D5,SKP2,CDC23,PSME4,BTRC,UBE3A,ANAPC1,PSMF1,DERL1,RCHY1,ANAPC15,CTR9,PSMA1,PSMA2,PSMA6,PSMB2,PSMB5,PSMB7,PSMC4,PSMC5,PSMD3,PSMD7,PSMD11,PSME2,GNL3,SENP2,PSME3
GO:0038093	Fc receptor signaling pathway	2.422e-05	0.1752	0.0007682	0.00727	32	206	ACTG1,RPS27A,FCGR1A,CUL1,NCKAP1,PSME4,BTRC,NRAS,GRB2,CHUK,PIK3R1,HSP90AB1,PSMF1,CRK,PPP3CA,PSMA1,PSMA2,PSMA6,PSMB2,PSMB5,PSMB7,PSMC4,PSMC5,PSMD3,PSMD7,PSMD11,PSME2,KRAS,ARPC5,ACTR2,PSME3,LYN
GO:1903321	negative regulation of protein modification by small protein conjugation or removal	2.48e-05	0.1794	0.0007833	0.007412	25	143	RPS27A,ANAPC5,CDC23,GTPBP4,PARK7,TRIP12,ANAPC1,PSMF1,ANAPC15,PSMA1,PSMA2,PSMA6,PSMB2,PSMB5,PSMB7,PSMC4,PSMC5,PSMD3,PSMD7,PSMD11,PSME2,PINX1,SENP2,PRMT3,PSME3
GO:0019058	viral life cycle	2.56e-05	0.1852	0.0008051	0.00762	56	447	SEH1L,RPL29,RPS8,RPS23,RPS25,RPS27A,ADAR,EIF3L,CCL2,HACD3,NELFCD,MON1B,THOC5,NDC1,NUP133,EIF3A,EIF3B,EIF3D,EIF3G,NBN,SRPK1,SRPK2,SSB,NUP205,SUPT4H1,APOBEC3C,LARP1,DICER1,XPR1,CHD1,PFN1,HSP90AB1,APOBEC3D,DERL1,POLR2D,PPIB,NUP93,USP6NL,CXCL8,ZC3HAV1,ILF3,PTBP1,ITGA5,ITGAV,DDX3X,RAB7A,RAB1A,KPNB1,KPNA4,RAN,ITCH,LAMP1,CHMP4B,EIF2AK4,RPL9,RPL12
GO:0007004	telomere maintenance via telomerase	2.737e-05	0.198	0.000857	0.00811	14	56	CCT7,CCT4,CCT2,MAPKAPK5,CCT5,CCT8,ATR,NEK2,TCP1,TERF2,CCT3,DKC1,PINX1,NAT10
GO:0000960	regulation of mitochondrial RNA catabolic process	2.771e-05	0.2004	0.000859	0.008129	4	4	SUPV3L1,PNPT1,LRPPRC,SLIRP
GO:0000957	mitochondrial RNA catabolic process	2.771e-05	0.2004	0.000859	0.008129	4	4	SUPV3L1,PNPT1,LRPPRC,SLIRP
GO:0006974	cellular response to DNA damage stimulus	2.779e-05	0.201	0.000859	0.008129	88	800	CHAF1B,ERCC4,MCM7,RPS27A,MCM10,CNOT6,ABRAXAS1,ZSWIM7,MNDA,CUL4B,CNOT11,XRN2,SGK1,USP28,APEX1,FANCM,SKIL,THOC5,RUVBL1,PPP4R2,HLTF,GINS2,MYC,ATR,BACH1,MEIOB,BCAT1,NBN,SSRP1,RUVBL2,ALKBH1,PSME4,PRPF19,TIMELESS,HERC2,COPS6,NONO,GRB2,BAZ1B,TERF2,PMS2CL,CCNG1,USP10,MSH6,GTF2H1,CNOT9,SUPT16H,CHEK2,MRPS35,HMGA1,TRIP12,ERCC8,UBA1,PIK3R1,NABP2,PLAGL1,TMEM109,ASF1A,PMAIP1,RCHY1,POLR2D,EI24,BCCIP,BRCC3,XRCC5…
GO:0032200	telomere organization	2.871e-05	0.2076	0.0008835	0.008361	26	153	ERCC4,APEX1,CCT7,CCT4,CCT2,MAPKAPK5,CCT5,CCT8,MYC,DHX36,ATR,NBN,NEK2,TCP1,TERF2,CCT3,NABP2,XRCC5,PRKDC,DKC1,PINX1,GNL3,UPF1,RFC2,NAT10,RPA2
GO:0033238	regulation of cellular amine metabolic process	2.923e-05	0.2114	0.0008958	0.008478	19	94	ABAT,PSME4,PEBP1,PARK7,HPRT1,PSMF1,PSMA1,PSMA2,PSMA6,PSMB2,PSMB5,PSMB7,PSMC4,PSMC5,PSMD3,PSMD7,PSMD11,PSME2,PSME3
GO:0006401	RNA catabolic process	3.2e-05	0.2314	0.0009766	0.009242	36	247	RPL29,RPS8,ETF1,RPS23,RPS25,RPS27A,CNOT6,CNOT11,XRN2,DCPS,LIN28B,ERI1,DIS3,PABPC4,RNPS1,SUPV3L1,ZPR1,DICER1,CNOT9,EXOSC8,PNPT1,EXOSC9,POLR2D,ZC3HAV1,EIF3E,PTBP1,THRAP3,EXOSC3,UPF1,LRPPRC,ABCE1,MRTO4,SLIRP,RPL9,RPL12,HNRNPR
GO:0031396	regulation of protein ubiquitination	3.347e-05	0.2421	0.001016	0.009618	38	267	LRRK2,RPS27A,ANAPC5,CUL1,TRIB2,DCUN1D5,SKP2,CDC23,PSME4,BTRC,TGFBR1,GTPBP4,PARK7,TRIP12,UBE3A,ANAPC1,HSP90AB1,PSMF1,DERL1,RCHY1,ANAPC15,CTR9,PSMA1,PSMA2,PSMA6,PSMB2,PSMB5,PSMB7,PSMC4,PSMC5,PSMD3,PSMD7,PSMD11,PSME2,PINX1,SENP2,PRMT3,PSME3
GO:0007006	mitochondrial membrane organization	3.358e-05	0.2429	0.001016	0.009618	20	103	APOOL,SLC25A5,THEM4,TIMM50,MYC,STAT3,AFG3L2,NMT1,COX18,OPA1,GSK3B,PDCD5,C19orf70,HSPA4,PMAIP1,APOO,PPIF,TIMM10,TIMM9,RHOT1
GO:0075522	IRES-dependent viral translational initiation	3.379e-05	0.2444	0.001018	0.009637	5	7	EIF3A,EIF3B,EIF3D,SSB,PTBP1
GO:0000963	mitochondrial RNA processing	3.532e-05	0.2555	0.00106	0.01003	7	15	CDK5RAP1,SUPV3L1,ELAC2,PNPT1,MTO1,TRIT1,TRMT61B
GO:0051236	establishment of RNA localization	3.551e-05	0.2568	0.001061	0.01004	29	182	SEH1L,XPO5,THOC5,IGF2BP1,IGF2BP3,NDC1,RBMX2,NUP133,CPSF3,ATR,NUP205,RNPS1,SUPT6H,CPSF2,RGPD2,DDX19B,U2AF2,PNPT1,AGFG1,AHCTF1,POLR2D,NUP93,NOL6,SLBP,RAN,UPF1,LRPPRC,SENP2,DDX39A
GO:0072524	pyridine-containing compound metabolic process	3.616e-05	0.2615	0.001076	0.01019	26	155	MDH2,ME2,ALDOA,MPI,MYC,NCF2,STAT3,GPI,TKT,QPRT,PDHA1,PGK1,TXNRD1,PKLR,PKM,PRDX5,NAXE,PSAT1,IDH3B,NUDT12,DLAT,LDHA,LDHB,DERA,NAMPT,ENO1
GO:0007007	inner mitochondrial membrane organization	3.754e-05	0.2715	0.001113	0.01053	8	20	APOOL,MYC,AFG3L2,OPA1,C19orf70,APOO,TIMM10,TIMM9
GO:1903320	regulation of protein modification by small protein conjugation or removal	4.344e-05	0.3142	0.001282	0.01214	40	290	LRRK2,RPS27A,ANAPC5,CUL1,TRIB2,DCUN1D5,SKP2,CDC23,PSME4,BTRC,TGFBR1,GTPBP4,PARK7,TRIP12,UBE3A,ANAPC1,HSP90AB1,PSMF1,DERL1,RCHY1,ANAPC15,CTR9,PSMA1,PSMA2,PSMA6,PSMB2,PSMB5,PSMB7,PSMC4,PSMC5,PSMD3,PSMD7,PSMD11,PSME2,PINX1,GNL3,ITCH,SENP2,PRMT3,PSME3
GO:0006997	nucleus organization	4.498e-05	0.3253	0.001322	0.01251	25	148	SEH1L,ZMPSTE24,POLR1B,NDC1,INTS13,NUP133,SRPK1,SRPK2,NUP205,PSME4,ZPR1,PES1,NOLC1,SELENOF,AGFG1,AHCTF1,PRKCA,NUP93,TMEM170A,FAM118B,GOPC,RTN4,CHMP4B,REEP3,TMEM33
GO:0002478	antigen processing and presentation of exogenous peptide antigen	4.515e-05	0.3266	0.001322	0.01251	27	166	FCGR1A,OSBPL1A,DCTN5,SEC24A,NCF2,PSME4,CANX,CLTA,PSMF1,CTSL,CTSS,CYBB,PSMA1,PSMA2,PSMA6,PSMB2,PSMB5,PSMB7,PSMC4,PSMC5,PSMD3,PSMD7,PSMD11,PSME2,ITGAV,RAB7A,PSME3
GO:0009894	regulation of catabolic process	4.631e-05	0.335	0.001351	0.01278	85	777	DRAM1,LRRK2,RPS27A,PARL,SCO1,ATP6V0D2,ANAPC5,LCMT1,CUL4B,CUL1,UBE2J1,TRIB2,SGTA,MSN,ATP6V1H,RUVBL1,TBK1,SMARCC1,BECN1,CDC23,SNX5,MYC,WBP11,ADAM9,STAT3,PSME4,SUPV3L1,TBC1D12,BTRC,PIM2,CAPNS1,LARP1,CBLB,GSK3B,POLR3A,USP10,SF3B3,THRA,AIFM1,CHEK2,ATP6V0A2,PDE3B,CTSC,PARK7,U2AF2,PHB,PNPT1,SNX6,UBE3A,ANAPC1,VDAC1,HSP90AB1,PSMF1,RCHY1,ANAPC15,XBP1,CTSA,POLDIP2,ZC3HAV1,PSMA1,PSMA2,PSMA6,PSMB2,PSMB5,PSMB7…
GO:0010833	telomere maintenance via telomere lengthening	4.797e-05	0.347	0.001393	0.01319	15	66	CCT7,CCT4,CCT2,MAPKAPK5,CCT5,CCT8,ATR,NEK2,TCP1,TERF2,CCT3,DKC1,PINX1,UPF1,NAT10
GO:0046034	ATP metabolic process	4.817e-05	0.3484	0.001394	0.01319	35	242	ALDOA,UQCRHL,MPI,SLC25A33,ATP1B1,ATP5F1A,MYC,ATP5PB,ATP5MC1,ATP5PF,NDUFA1,NDUFA9,NDUFAB1,NDUFB5,NDUFS1,STAT3,GPI,ATP6V0A2,PARK7,PGK1,COX5A,PKLR,PKM,UQCRFS1,PMPCB,COX6A1,COX7B,COX7C,ATP5MF,COA6,LDHA,PPIF,NDUFAF1,ENO1,COQ7
GO:0000209	protein polyubiquitination	5.82e-05	0.4209	0.001677	0.01587	36	254	BFAR,RPS27A,ANAPC5,CUL1,SKP2,HLTF,CDC23,BLMH,PSME4,PRPF19,BTRC,CBLB,TRIP12,ERCC8,UBE3A,ANAPC1,ANAPC13,PSMF1,DZIP3,PSMA1,PSMA2,PSMA6,PSMB2,PSMB5,PSMB7,PSMC4,PSMC5,PSMD3,PSMD7,PSMD11,PSME2,ITCH,RBBP6,C18orf25,RNF6,PSME3
GO:0080134	regulation of response to stress	6.179e-05	0.4469	0.001769	0.01674	152	1579	SEH1L,CHAF1B,ABAT,LRRK2,CD109,IMPACT,LGR4,BFAR,RPS27A,ADAR,TLR8,PIK3R4,S100A8,S100A9,FCGR1A,ABRAXAS1,FECH,PARL,CCL2,ATP6V0D2,WDFY1,CUL1,UBE2J1,SLC25A6,HACD3,SGTA,ANXA5,APEX1,ZCCHC17,SKIL,THOC5,ATP6V1H,POLR3B,NDC1,RUVBL1,PPP4R2,TBK1,NUP133,ATP1B1,BECN1,SNRPD1,SNX5,MYC,WBP11,ATR,SPP1,STK26,PDCD4,NUP205,PSME4,VAMP7,TBC1D12,C1QBP,C3,NONO,BTRC,ZNF681,NRAS,PIM2,CAPNS1,LARP1,TERF2,CBS,DICER1,OPA1,GSK3B,…
GO:2000278	regulation of DNA biosynthetic process	6.188e-05	0.4476	0.001769	0.01674	19	99	CCT7,CCT4,CCT2,MAPKAPK5,CCT5,CCT8,MYC,ATR,NEK2,TCP1,TERF2,GSK3B,CCT3,NABP2,CHTF8,DKC1,PINX1,RFC2,NAT10
GO:0045089	positive regulation of innate immune response	6.344e-05	0.4589	0.001807	0.0171	41	305	LGR4,RPS27A,TLR8,PIK3R4,WDFY1,CUL1,POLR3B,TBK1,PSME4,C1QBP,BTRC,NRAS,CD14,HSP90B1,DDX58,CLEC7A,CHUK,PSMF1,LSM14A,PUM1,CTSL,CTSS,ZC3HAV1,PSMA1,PSMA2,PSMA6,PSMB2,PSMB5,PSMB7,PSMC4,PSMC5,PSMD3,PSMD7,PSMD11,PSME2,MAPKAPK3,KRAS,ITCH,LAMP1,PSME3,LYN
GO:0050657	nucleic acid transport	6.722e-05	0.4862	0.001899	0.01797	28	179	SEH1L,XPO5,THOC5,IGF2BP1,IGF2BP3,NDC1,RBMX2,NUP133,CPSF3,NUP205,RNPS1,SUPT6H,CPSF2,RGPD2,DDX19B,U2AF2,PNPT1,AGFG1,AHCTF1,POLR2D,NUP93,NOL6,SLBP,RAN,UPF1,LRPPRC,SENP2,DDX39A
GO:0050658	RNA transport	6.722e-05	0.4862	0.001899	0.01797	28	179	SEH1L,XPO5,THOC5,IGF2BP1,IGF2BP3,NDC1,RBMX2,NUP133,CPSF3,NUP205,RNPS1,SUPT6H,CPSF2,RGPD2,DDX19B,U2AF2,PNPT1,AGFG1,AHCTF1,POLR2D,NUP93,NOL6,SLBP,RAN,UPF1,LRPPRC,SENP2,DDX39A
GO:0006261	DNA-dependent DNA replication	6.928e-05	0.5011	0.00195	0.01845	23	134	MCMBP,MCM2,MCM3,MCM6,MCM7,MCM10,SLC25A33,FANCM,GINS2,NBN,ZPR1,TERF2,TFAM,CHEK2,CDC6,ORC6,HMGA1,CHTF8,TIPIN,SLBP,UPF1,RFC2,SENP2
GO:0080135	regulation of cellular response to stress	7.024e-05	0.5081	0.001969	0.01864	82	752	SEH1L,LRRK2,IMPACT,BFAR,ABRAXAS1,FECH,PARL,ATP6V0D2,UBE2J1,HACD3,SGTA,APEX1,SKIL,THOC5,ATP6V1H,NDC1,RUVBL1,PPP4R2,TBK1,NUP133,BECN1,SNX5,MYC,WBP11,ATR,SPP1,STK26,PDCD4,NUP205,TBC1D12,NONO,PIM2,CAPNS1,LARP1,TERF2,CBS,OPA1,GSK3B,POLR3A,GSTP1,PPP1R15B,PRDX1,CHEK2,ATP6V0A2,PARK7,U2AF2,HMGA1,DNAJC7,TRIP12,TXN,ERCC8,PNPT1,SNX6,PIK3R1,CCR7,PMAIP1,VDAC1,HSP90AB1,BAG4,BAG3,XBP1,BRCC3,IGF1R,PRKDC,NUP93,POL…
GO:0031329	regulation of cellular catabolic process	7.541e-05	0.5455	0.002106	0.01993	74	663	DRAM1,LRRK2,RPS27A,PARL,SCO1,ATP6V0D2,ANAPC5,LCMT1,CUL1,TRIB2,SGTA,MSN,ATP6V1H,RUVBL1,TBK1,SMARCC1,BECN1,CDC23,SNX5,MYC,WBP11,ADAM9,STAT3,PSME4,SUPV3L1,TBC1D12,BTRC,PIM2,CAPNS1,LARP1,GSK3B,POLR3A,USP10,AIFM1,ATP6V0A2,CTSC,PARK7,U2AF2,PNPT1,SNX6,UBE3A,ANAPC1,VDAC1,HSP90AB1,PSMF1,RCHY1,ANAPC15,XBP1,CTSA,POLDIP2,ZC3HAV1,PSMA1,PSMA2,PSMA6,PSMB2,PSMB5,PSMB7,PSMC4,PSMC5,PSMD3,PSMD7,PSMD11,PSME2,KEAP1,D…
GO:0002192	IRES-dependent translational initiation of linear mRNA	8.189e-05	0.5923	0.002278	0.02156	6	12	EIF3A,EIF3B,EIF3D,SSB,PTBP1,EIF2D
GO:0045862	positive regulation of proteolysis	8.234e-05	0.5956	0.002282	0.0216	48	381	LRRK2,RPS27A,S100A8,S100A9,MMP14,ANAPC5,CUL1,TRIB2,SGTA,APP,RUVBL1,CDC23,MYC,ADAM9,CLPX,STAT3,PSME4,C3,BTRC,GSK3B,AIFM1,PDCD5,CTSC,PHB,ANAPC1,PMAIP1,PSMF1,RCHY1,ANAPC15,XBP1,PSMA1,PSMA2,PSMA6,PSMB2,PSMB5,PSMB7,PSMC4,PSMC5,PSMD3,PSMD7,PSMD11,PSME2,KEAP1,DDX3X,CLN6,AKIRIN2,ROBO1,PSME3
GO:0009142	nucleoside triphosphate biosynthetic process	8.631e-05	0.6243	0.002383	0.02255	16	77	ALDOA,ATP5F1A,MYC,ATP5PB,ATP5MC1,ATP5PF,CMPK1,SUCLG1,STAT3,ATP6V0A2,TYMS,CTPS2,PKLR,PKM,ATP5MF,CTPS1
GO:0046496	nicotinamide nucleotide metabolic process	8.83e-05	0.6386	0.002419	0.02289	24	145	MDH2,ME2,ALDOA,MPI,MYC,NCF2,STAT3,GPI,TKT,QPRT,PDHA1,PGK1,TXNRD1,PKLR,PKM,PRDX5,IDH3B,NUDT12,DLAT,LDHA,LDHB,DERA,NAMPT,ENO1
GO:0019362	pyridine nucleotide metabolic process	8.83e-05	0.6386	0.002419	0.02289	24	145	MDH2,ME2,ALDOA,MPI,MYC,NCF2,STAT3,GPI,TKT,QPRT,PDHA1,PGK1,TXNRD1,PKLR,PKM,PRDX5,IDH3B,NUDT12,DLAT,LDHA,LDHB,DERA,NAMPT,ENO1
GO:0043648	dicarboxylic acid metabolic process	8.875e-05	0.6419	0.002422	0.02293	20	110	ACLY,MDH2,ME2,FH,MTHFD1,ATIC,SUCLG2,SUCLG1,SUCLA2,GLS,GOT1,GOT2,OAT,QPRT,KYAT3,SLC25A32,MTHFD1L,IDH3B,CS,KEAP1
GO:0038061	NIK/NF-kappaB signaling	9.358e-05	0.6769	0.002545	0.02408	21	119	ACTN4,RPS27A,CUL1,PSME4,BTRC,CHUK,PSMF1,AKIP1,PSMA1,PSMA2,PSMA6,PSMB2,PSMB5,PSMB7,PSMC4,PSMC5,PSMD3,PSMD7,PSMD11,PSME2,PSME3
GO:0031349	positive regulation of defense response	0.000103	0.7447	0.002789	0.0264	52	427	LGR4,RPS27A,TLR8,PIK3R4,S100A8,S100A9,FCGR1A,CCL2,WDFY1,CUL1,SLC25A6,POLR3B,TBK1,PSME4,VAMP7,C1QBP,C3,BTRC,NRAS,TGM2,CD14,HSP90B1,DDX58,CLEC7A,CHUK,CCR7,PSMF1,PRKCA,LSM14A,PUM1,CTSL,CTSS,ZC3HAV1,PSMA1,PSMA2,PSMA6,PSMB2,PSMB5,PSMB7,PSMC4,PSMC5,PSMD3,PSMD7,PSMD11,PSME2,MAPKAPK3,PLA2G7,KRAS,ITCH,LAMP1,PSME3,LYN
GO:0006405	RNA export from nucleus	0.000106	0.7663	0.002859	0.02706	21	120	SEH1L,XPO5,THOC5,NDC1,RBMX2,NUP133,CPSF3,NUP205,RNPS1,SUPT6H,CPSF2,DDX19B,U2AF2,AGFG1,POLR2D,NUP93,NOL6,SLBP,RAN,UPF1,DDX39A
GO:0034655	nucleobase-containing compound catabolic process	0.000114	0.8246	0.003065	0.02901	51	418	RPL29,RPS8,ETF1,RPS23,RPS25,RPS27A,CNOT6,AHCY,CNOT11,XRN2,DCPS,LIN28B,ERI1,DIS3,NT5C2,MYC,PABPC4,NCF2,STAT3,RNPS1,SUPV3L1,ZPR1,APOBEC3C,DICER1,CNOT9,AIFM1,PDE3B,EXOSC8,PNPT1,HPRT1,DCTPP1,EXOSC9,POLR2D,ZC3HAV1,EIF3E,PTBP1,NUDT12,DFFA,THRAP3,KPNB1,ENTPD7,EXOSC3,UPF1,DERA,LRPPRC,ABCE1,MRTO4,SLIRP,RPL9,RPL12,HNRNPR
GO:0030163	protein catabolic process	0.0001158	0.8375	0.003102	0.02936	89	844	CLPP,ZMPSTE24,LRRK2,UBAP1,BFAR,RPS27A,LYPLA1,SCO1,ANAPC5,LCMT1,CUL4B,CUL2,CUL1,UBE2J1,TRIB2,USP28,SGTA,SKP2,MSN,EDEM3,KLHL15,SMARCC1,CDC23,AUP1,ADAM9,CLPX,FAF2,PSME4,PRPF19,HERC2,BTRC,USP22,CBL,CBLB,GSK3B,CCNF,USP10,SF3B3,CHEK2,HSP90B1,CTSC,PARK7,TRIP12,PHB,ERCC8,UBA1,UBE3A,ANAPC1,UCHL3,PMAIP1,HSP90AB1,PSMF1,DERL1,RCHY1,ANAPC15,XBP1,CTSA,DZIP3,CTSL,CTSS,PSMA1,PSMA2,PSMA6,PSMB2,PSMB5,PSMB7,FBXL12,…
GO:0032446	protein modification by small protein conjugation	0.0001196	0.8653	0.003193	0.03022	94	903	UBA5,SEH1L,MARCH2,LRRK2,BFAR,RPS27A,BRAP,MIB1,ANAPC5,CUL4B,CUL2,CUL1,UBE2J1,TRIB2,DCUN1D5,UFC1,SKP2,NOP58,NDC1,MARCH3,KLHL15,NUP133,HLTF,CCNB1IP1,CDC23,BACH1,KBTBD8,NAIP,NUP205,BLMH,PSME4,MOCS3,PRPF19,HERC2,BTRC,RGPD2,USP22,CBL,CBLB,PIAS2,CCNF,TGFBR1,CDK8,GTPBP4,PARK7,MKRN2,PEX12,TRIP12,CISH,ERCC8,UBA1,UBE3A,ANAPC1,ANAPC13,HSP90AB1,PSMF1,DERL1,RCHY1,ANAPC15,CTR9,DZIP3,NUP93,DCAF1,PSMA1,PSMA2,PSMA…
GO:0043628	ncRNA 3'-end processing	0.0001205	0.8716	0.003202	0.0303	8	23	FBL,ELAC1,ERI1,EXOSC8,ELAC2,EXOSC9,DKC1,EXOSC3
GO:2001268	negative regulation of cysteine-type endopeptidase activity involved in apoptotic signaling pathway	0.0001209	0.8741	0.003202	0.0303	4	5	MMP9,PARK7,PLAUR,PIH1D1
GO:0009725	response to hormone	0.0001225	0.8863	0.003235	0.03061	105	1033	MKKS,UBA5,NR2F6,MAX,RPS6KB1,ADCY7,RAB8A,SORT1,CITED2,SAFB,FBN1,FECH,AIF1,CCL2,ATP6V0D2,MMP14,SGK1,SLC25A33,ANXA5,APEX1,SKP2,MSN,NCOA5,GAS2L1,ATP6V1H,ASNS,SMARCC1,NCOA1,ATP2A2,SNRPN,AHCYL1,SPP1,ADAM9,NAIP,NCF2,RUVBL2,LANCL2,STAT3,KLF9,EIF2B3,EIF2B5,C3,GOT1,RAB31,GRB2,GRN,CBLB,PIAS2,GSK3B,TGFBR1,GSTP1,THBS1,THRA,CNOT9,AIFM1,PAPPA,CDC6,ATP6V0A2,CDK4,PDE3B,PARK7,SERPINF1,MED14,PHB2,HMGCS1,PHB,CISH,TY…
GO:0060071	Wnt signaling pathway, planar cell polarity pathway	0.0001306	0.9443	0.003434	0.0325	20	113	RPS27A,MLLT3,PSME4,PFN1,PSMF1,PSMA1,PSMA2,PSMA6,PSMB2,PSMB5,PSMB7,PSMC4,PSMC5,PSMD3,PSMD7,PSMD11,PSME2,FZD3,LRP6,PSME3
GO:0010498	proteasomal protein catabolic process	0.0001447	1	0.003791	0.03588	51	422	LRRK2,BFAR,RPS27A,SCO1,ANAPC5,LCMT1,CUL1,UBE2J1,TRIB2,SGTA,SKP2,EDEM3,SMARCC1,CDC23,AUP1,FAF2,PSME4,PRPF19,BTRC,GSK3B,CCNF,HSP90B1,PARK7,ERCC8,ANAPC1,PMAIP1,HSP90AB1,PSMF1,DERL1,RCHY1,ANAPC15,XBP1,DZIP3,PSMA1,PSMA2,PSMA6,PSMB2,PSMB5,PSMB7,PSMC4,PSMC5,PSMD3,PSMD7,PSMD11,PSME2,KEAP1,CCDC47,UBXN8,C18orf25,RNF6,PSME3
GO:0032870	cellular response to hormone stimulus	0.0001456	1	0.003791	0.03588	74	677	MKKS,UBA5,NR2F6,MAX,RPS6KB1,ADCY7,RAB8A,SAFB,FBN1,FECH,AIF1,CCL2,ATP6V0D2,SGK1,SLC25A33,ANXA5,APEX1,SKP2,MSN,NCOA5,GAS2L1,ATP6V1H,ASNS,SMARCC1,NCOA1,AHCYL1,NAIP,NCF2,RUVBL2,LANCL2,STAT3,KLF9,GOT1,RAB31,GRB2,PIAS2,GSTP1,THRA,CNOT9,AIFM1,CDC6,ATP6V0A2,PDE3B,PARK7,SERPINF1,MED14,PHB2,HMGCS1,PHB,CISH,UBE3A,PIK3R1,UCHL3,PKLR,NUCKS1,EEF2K,ABCG2,XBP1,PPAT,IGF1R,PRKAR2A,PRKCA,APPL1,PRKDC,CTSL,CTSS,MED24,…
GO:0019941	modification-dependent protein catabolic process	0.0001457	1	0.003791	0.03588	67	598	ZMPSTE24,LRRK2,UBAP1,BFAR,RPS27A,ANAPC5,LCMT1,CUL4B,CUL2,CUL1,UBE2J1,TRIB2,USP28,SGTA,SKP2,EDEM3,KLHL15,SMARCC1,CDC23,AUP1,FAF2,PSME4,HERC2,BTRC,USP22,CBL,GSK3B,CCNF,USP10,HSP90B1,PARK7,TRIP12,ERCC8,UBA1,UBE3A,ANAPC1,UCHL3,HSP90AB1,PSMF1,DERL1,RCHY1,ANAPC15,XBP1,DZIP3,PSMA1,PSMA2,PSMA6,PSMB2,PSMB5,PSMB7,FBXL12,PSMC4,PSMC5,PSMD3,PSMD7,PSMD11,PSME2,KEAP1,OTUD7B,CCDC47,ITCH,RBBP6,UBXN8,VPS36,C18orf2…
GO:0090175	regulation of establishment of planar polarity	0.0001479	1	0.003835	0.03629	20	114	RPS27A,MLLT3,PSME4,PFN1,PSMF1,PSMA1,PSMA2,PSMA6,PSMB2,PSMB5,PSMB7,PSMC4,PSMC5,PSMD3,PSMD7,PSMD11,PSME2,FZD3,LRP6,PSME3
GO:0034504	protein localization to nucleus	0.0001545	1	0.003992	0.03778	48	391	ADAR,IPO8,IPO7,CCT7,CCT4,CCT2,RBM22,NOP58,CCT5,INTS13,NUP133,CCT8,MBTPS1,HNRNPM,STAT3,NUP205,TAF8,ZPR1,RGPD2,TCP1,CBLB,GSK3B,TGFBR1,THRA,PRDX1,TNPO3,DDX58,CCT3,PARK7,PHB2,KPNA6,TXN,PIK3R1,HSP90AB1,XBP1,MAPK14,PPP3CA,NUP93,KEAP1,OTUD7B,PINX1,KPNB1,KPNA4,TNPO1,IPO5,RAN,SMAD4,IPO11
GO:0006278	RNA-dependent DNA biosynthetic process	0.0001574	1	0.00405	0.03833	14	65	CCT7,CCT4,CCT2,MAPKAPK5,CCT5,CCT8,ATR,NEK2,TCP1,TERF2,CCT3,DKC1,PINX1,NAT10
GO:0045727	positive regulation of translation	0.0001604	1	0.004113	0.03893	19	106	ABCF1,RPS6KB1,IMPACT,SYNCRIP,NSUN4,CDK5RAP1,EIF2B5,C1QBP,LARP1,THBS1,CDK4,CIRBP,GUF1,POLR2D,PTBP1,DDX3X,RBM3,EEF2,EIF2AK4
GO:1903050	regulation of proteolysis involved in cellular protein catabolic process	0.0001628	1	0.004162	0.03938	36	267	LRRK2,RPS27A,SCO1,ANAPC5,LCMT1,CUL1,TRIB2,SGTA,SMARCC1,CDC23,PSME4,BTRC,GSK3B,CTSC,PARK7,UBE3A,ANAPC1,HSP90AB1,PSMF1,RCHY1,ANAPC15,XBP1,PSMA1,PSMA2,PSMA6,PSMB2,PSMB5,PSMB7,PSMC4,PSMC5,PSMD3,PSMD7,PSMD11,PSME2,KEAP1,PSME3
GO:0051028	mRNA transport	0.0001686	1	0.004293	0.04063	24	151	SEH1L,THOC5,IGF2BP1,IGF2BP3,NDC1,RBMX2,NUP133,CPSF3,NUP205,RNPS1,SUPT6H,CPSF2,RGPD2,DDX19B,U2AF2,AGFG1,AHCTF1,POLR2D,NUP93,SLBP,UPF1,LRPPRC,SENP2,DDX39A
GO:0009067	aspartate family amino acid biosynthetic process	0.0001695	1	0.004302	0.04071	8	24	MTHFD1,ASNS,MTR,GOT1,GOT2,ENOPH1,ASNSD1,EIF2B1
GO:0032869	cellular response to insulin stimulus	0.0001703	1	0.004307	0.04076	30	208	RPS6KB1,RAB8A,CCL2,ATP6V0D2,SGK1,SLC25A33,NCOA5,ATP6V1H,SMARCC1,GOT1,RAB31,GRB2,GSTP1,ATP6V0A2,PDE3B,CISH,PIK3R1,UCHL3,PKLR,NUCKS1,EEF2K,XBP1,PPAT,IGF1R,PRKCA,APPL1,PRKDC,PTPN11,NAMPT,EIF4EBP2
GO:0043161	proteasome-mediated ubiquitin-dependent protein catabolic process	0.0001745	1	0.004399	0.04163	48	393	LRRK2,BFAR,RPS27A,ANAPC5,LCMT1,CUL1,UBE2J1,TRIB2,SGTA,SKP2,EDEM3,SMARCC1,CDC23,AUP1,FAF2,PSME4,BTRC,GSK3B,CCNF,HSP90B1,PARK7,ERCC8,ANAPC1,HSP90AB1,PSMF1,DERL1,RCHY1,ANAPC15,XBP1,DZIP3,PSMA1,PSMA2,PSMA6,PSMB2,PSMB5,PSMB7,PSMC4,PSMC5,PSMD3,PSMD7,PSMD11,PSME2,KEAP1,CCDC47,UBXN8,C18orf25,RNF6,PSME3
GO:0045732	positive regulation of protein catabolic process	0.0001755	1	0.004408	0.04171	36	268	LRRK2,RPS27A,ANAPC5,CUL4B,CUL1,TRIB2,SGTA,MSN,CDC23,ADAM9,PSME4,BTRC,CBLB,GSK3B,CTSC,ANAPC1,PSMF1,RCHY1,ANAPC15,XBP1,PSMA1,PSMA2,PSMA6,PSMB2,PSMB5,PSMB7,PSMC4,PSMC5,PSMD3,PSMD7,PSMD11,PSME2,KEAP1,RAB7A,ITCH,PSME3
GO:0001824	blastocyst development	0.0001815	1	0.004542	0.04299	17	90	CITED2,SKIL,THOC5,CCNB1IP1,ATP1B1,NBN,NEK2,TAF8,ZPR1,BYSL,PRPF19,GRN,TGFBR1,CTR9,DAD1,PSMC4,PALB2
GO:0031331	positive regulation of cellular catabolic process	0.000191	1	0.004765	0.04509	44	352	LRRK2,RPS27A,ANAPC5,CUL1,TRIB2,SGTA,MSN,TBK1,BECN1,CDC23,MYC,ADAM9,PSME4,SUPV3L1,BTRC,PIM2,LARP1,GSK3B,CTSC,PARK7,PNPT1,ANAPC1,PSMF1,RCHY1,ANAPC15,XBP1,ZC3HAV1,PSMA1,PSMA2,PSMA6,PSMB2,PSMB5,PSMB7,PSMC4,PSMC5,PSMD3,PSMD7,PSMD11,PSME2,KEAP1,UPF1,PSME3,EIF2AK4,HNRNPR
GO:0006119	oxidative phosphorylation	0.0002066	1	0.005135	0.0486	19	108	UQCRHL,SLC25A33,MYC,NDUFA1,NDUFA9,NDUFAB1,NDUFB5,NDUFS1,PARK7,COX5A,UQCRFS1,PMPCB,COX6A1,COX7B,COX7C,COA6,PPIF,NDUFAF1,COQ7
GO:0051173	positive regulation of nitrogen compound metabolic process	0.0002097	1	0.005196	0.04917	178	1944	ABAT,ZNF326,SF3B4,ABCF1,RPS6KB1,IMPACT,LGR4,RPS27A,ADCY7,NUFIP1,CITED2,S100A8,S100A9,SAFB,MBTPS2,ABRAXAS1,AIF1,NSMAF,SYNCRIP,NSUN4,NAA15,NELFCD,APEX1,CCT7,CCT4,CHD8,CCT2,CHD7,APP,MAPKAPK5,PCGF5,THOC5,ARID3B,MAPRE3,RBM22,CCT5,TBK1,HLTF,CDK5RAP1,CCT8,SMARCC1,NCOA1,SMN2,GABPA,MYC,DHX36,ATR,BEX1,BACH1,NBN,NCL,RAD54L2,RUVBL2,STAT3,NEK2,TAF8,SUPT4H1,SUPT6H,KLF9,SUPV3L1,ZPR1,EIF2B5,C1QBP,MYDGF,PRPF19,TA…
GO:0006275	regulation of DNA replication	0.0002121	1	0.005235	0.04954	26	172	CCT7,CCT4,CCT2,MAPKAPK5,CCT5,CCT8,ATR,NBN,NEK2,TCP1,TERF2,CHEK2,CDC6,GTPBP4,CCT3,NABP2,IGF1R,CHTF8,TIPIN,DKC1,PINX1,RBBP6,RFC2,GMNN,NAT10,SENP2
GO:0045088	regulation of innate immune response	0.0002138	1	0.005259	0.04977	46	375	LGR4,RPS27A,ADAR,TLR8,PIK3R4,WDFY1,CUL1,POLR3B,TBK1,PSME4,C1QBP,BTRC,NRAS,CDC37,CD14,HSP90B1,DDX58,CLEC7A,CHUK,HSP90AB1,PSMF1,IFNAR1,LSM14A,PUM1,CTSL,CTSS,ZC3HAV1,PSMA1,PSMA2,PSMA6,PSMB2,PSMB5,PSMB7,PSMC4,PSMC5,PSMD3,PSMD7,PSMD11,PSME2,PTPN11,MAPKAPK3,KRAS,ITCH,LAMP1,PSME3,LYN
GO:0006626	protein targeting to mitochondrion	0.000229	1	0.005616	0.05314	24	154	LRRK2,TOMM5,MIPEP,PARL,TOMM40,TIMM44,SLC25A6,RUVBL1,TIMM21,TIMM50,WBP11,PMPCA,AFG3L2,POLR3A,PDCD5,U2AF2,UGCG,HSPA4,BAG4,PSMB7,STARD7,TOMM70,TIMM10,TIMM9
GO:0006541	glutamine metabolic process	0.0002338	1	0.005714	0.05407	8	25	ASNS,GLS,PFAS,CTPS2,ASNSD1,PPAT,CTPS1,PHGDH
GO:0046040	IMP metabolic process	0.000235	1	0.005724	0.05417	6	14	PAICS,NT5C2,ATIC,PFAS,HPRT1,PPAT
GO:0019882	antigen processing and presentation	0.0002427	1	0.005891	0.05575	32	232	FCGR1A,OSBPL1A,DCTN5,SEC24A,NCF2,PSME4,AP3D1,CANX,CD1C,THBS1,CLTA,CCR7,PSMF1,CTSL,CTSS,CYBB,PSMA1,PSMA2,PSMA6,PSMB2,PSMB5,PSMB7,PSMC4,PSMC5,PSMD3,PSMD7,PSMD11,PSME2,ITGAV,RAB7A,RAB27A,PSME3
GO:0046700	heterocycle catabolic process	0.000246	1	0.005951	0.05632	54	464	RPL29,RPS8,ETF1,RPS23,RPS25,RPS27A,CNOT6,AHCY,CNOT11,XRN2,DCPS,LIN28B,ERI1,DIS3,NT5C2,MYC,PABPC4,NCF2,STAT3,BLVRA,RNPS1,SUPV3L1,ZPR1,APOBEC3C,GOT2,DICER1,CNOT9,AIFM1,QPRT,PDE3B,EXOSC8,PNPT1,HPRT1,DCTPP1,EXOSC9,POLR2D,ZC3HAV1,EIF3E,PTBP1,NUDT12,DFFA,THRAP3,KPNB1,ENTPD7,EXOSC3,UPF1,DERA,LRPPRC,ABCE1,MRTO4,SLIRP,RPL9,RPL12,HNRNPR
GO:0043414	macromolecule methylation	0.0002532	1	0.006104	0.05777	36	273	FBL,MRM1,ETF1,PRMT5,LCMT1,NSUN4,TRMT1,PYURF,TRMT6,MTR,WDR82,FTSJ3,RNMT,CMTR1,DIMT1,SUPT6H,DPY30,WDR5,GSK3B,PWP1,MTA2,WDR77,MRM2,XBP1,VIRMA,CTR9,ILF3,FTSJ1,NSUN2,SMYD2,TRMT61B,PIH1D1,ARMT1,PCMTD2,PRMT3,SMAD4
GO:0006353	DNA-templated transcription, termination	0.0002887	1	0.006907	0.06537	18	102	PRMT5,POLR1B,XRN2,THOC5,MTERF2,SMN2,CPSF3,SNRPF,TWISTNB,RNPS1,CPSF2,GTF2H1,POLR1E,U2AF2,TAF1D,POLR1A,SLBP,DDX39A
GO:0002757	immune response-activating signal transduction	0.0002888	1	0.006907	0.06537	54	467	LGR4,ACTG1,RPS27A,TLR8,PIK3R4,FCGR1A,MNDA,WDFY1,CUL1,TBK1,NCKAP1,PSME4,C1QBP,SKAP2,BTRC,NRAS,GRB2,CBLB,CD14,HSP90B1,DDX58,CLEC7A,CHUK,PIK3R1,CCR7,HSP90AB1,PSMF1,CRK,LSM14A,PUM1,CTSL,CTSS,ZC3HAV1,PSMA1,PSMA2,PSMA6,PSMB2,PSMB5,PSMB7,PSMC4,PSMC5,PSMD3,PSMD7,PSMD11,PSME2,PTPRJ,MAPKAPK3,KRAS,ITCH,ARPC5,ACTR2,ELF1,PSME3,LYN
GO:0042773	ATP synthesis coupled electron transport	0.0002899	1	0.006907	0.06537	16	85	UQCRHL,NDUFA1,NDUFA9,NDUFAB1,NDUFB5,NDUFS1,PARK7,COX5A,UQCRFS1,PMPCB,COX6A1,COX7B,COX7C,COA6,NDUFAF1,COQ7
GO:0048002	antigen processing and presentation of peptide antigen	0.0002903	1	0.006907	0.06537	27	185	FCGR1A,OSBPL1A,DCTN5,SEC24A,NCF2,PSME4,CANX,CLTA,PSMF1,CTSL,CTSS,CYBB,PSMA1,PSMA2,PSMA6,PSMB2,PSMB5,PSMB7,PSMC4,PSMC5,PSMD3,PSMD7,PSMD11,PSME2,ITGAV,RAB7A,PSME3
GO:0006511	ubiquitin-dependent protein catabolic process	0.0002916	1	0.006915	0.06544	65	590	LRRK2,UBAP1,BFAR,RPS27A,ANAPC5,LCMT1,CUL4B,CUL2,CUL1,UBE2J1,TRIB2,USP28,SGTA,SKP2,EDEM3,KLHL15,SMARCC1,CDC23,AUP1,FAF2,PSME4,HERC2,BTRC,USP22,CBL,GSK3B,CCNF,USP10,HSP90B1,PARK7,TRIP12,ERCC8,UBE3A,ANAPC1,UCHL3,HSP90AB1,PSMF1,DERL1,RCHY1,ANAPC15,XBP1,DZIP3,PSMA1,PSMA2,PSMA6,PSMB2,PSMB5,PSMB7,FBXL12,PSMC4,PSMC5,PSMD3,PSMD7,PSMD11,PSME2,KEAP1,OTUD7B,CCDC47,ITCH,RBBP6,UBXN8,VPS36,C18orf25,RNF6,PSME3
GO:0033108	mitochondrial respiratory chain complex assembly	0.0003013	1	0.007121	0.06739	15	77	TIMMDC1,SCO1,SLC25A33,TIMM21,COA1,TMEM126B,NDUFA1,NDUFA9,NDUFAB1,NDUFB5,NDUFS1,TFAM,OXA1L,AIFM1,NDUFAF1
GO:0031167	rRNA methylation	0.0003101	1	0.007306	0.06914	7	20	FBL,MRM1,NSUN4,PYURF,FTSJ3,DIMT1,MRM2
GO:0032868	response to insulin	0.0003195	1	0.007502	0.071	35	266	MAX,RPS6KB1,RAB8A,SORT1,CCL2,ATP6V0D2,SGK1,SLC25A33,NCOA5,ATP6V1H,SMARCC1,GOT1,RAB31,GRB2,GSK3B,GSTP1,ATP6V0A2,PDE3B,CISH,PIK3R1,UCHL3,PKLR,PKM,NUCKS1,EEF2K,XBP1,PPAT,IGF1R,PRKCA,APPL1,PRKDC,PTPN11,NAMPT,EIF4EBP2,LYN
GO:1903362	regulation of cellular protein catabolic process	0.0003283	1	0.007662	0.07251	37	287	LRRK2,RPS27A,SCO1,ANAPC5,LCMT1,CUL1,TRIB2,SGTA,MSN,SMARCC1,CDC23,PSME4,BTRC,GSK3B,CTSC,PARK7,UBE3A,ANAPC1,HSP90AB1,PSMF1,RCHY1,ANAPC15,XBP1,PSMA1,PSMA2,PSMA6,PSMB2,PSMB5,PSMB7,PSMC4,PSMC5,PSMD3,PSMD7,PSMD11,PSME2,KEAP1,PSME3
GO:0002253	activation of immune response	0.0003284	1	0.007662	0.07251	59	525	LGR4,ACTG1,RPS27A,TLR8,PIK3R4,FCGR1A,MNDA,WDFY1,CUL1,TBK1,NCKAP1,PSME4,C1QBP,C3,SKAP2,BTRC,NRAS,GRB2,CBLB,CD14,HSP90B1,DDX58,VSIG4,PHB2,CLEC7A,CHUK,PHB,PIK3R1,CCR7,HSP90AB1,PSMF1,CRK,LSM14A,PUM1,CTSL,CTSS,PROS1,ZC3HAV1,PSMA1,PSMA2,PSMA6,PSMB2,PSMB5,PSMB7,PSMC4,PSMC5,PSMD3,PSMD7,PSMD11,PSME2,PTPRJ,MAPKAPK3,KRAS,ITCH,ARPC5,ACTR2,ELF1,PSME3,LYN
GO:0006189	'de novo' IMP biosynthetic process	0.0003416	1	0.007945	0.07519	4	6	PAICS,ATIC,PFAS,PPAT
GO:0070647	protein modification by small protein conjugation or removal	0.0003434	1	0.00796	0.07533	102	1026	UBA5,SEH1L,MARCH2,LRRK2,BFAR,RPS27A,BRAP,MIB1,ANAPC5,CUL4B,CUL2,CUL1,UBE2J1,TRIB2,DCUN1D5,USP28,UFC1,SKP2,NOP58,NDC1,MARCH3,KLHL15,NUP133,HLTF,USP39,CCNB1IP1,CDC23,BACH1,KBTBD8,NAIP,NUP205,BLMH,PSME4,MOCS3,PRPF19,HERC2,COPS6,BTRC,RGPD2,USP22,CBL,CBLB,PIAS2,CCNF,TGFBR1,USP10,CDK8,GTPBP4,PARK7,MKRN2,PEX12,TRIP12,CISH,ERCC8,UBA1,UBE3A,ANAPC1,UCHL3,ANAPC13,HSP90AB1,PSMF1,DERL1,RCHY1,ANAPC15,BRCC3,CTR…
GO:0002190	cap-independent translational initiation	0.0003682	1	0.008509	0.08052	6	15	EIF3A,EIF3B,EIF3D,SSB,PTBP1,EIF2D
GO:0072655	establishment of protein localization to mitochondrion	0.0003772	1	0.008689	0.08223	27	188	LRRK2,TOMM5,MIPEP,PARL,TOMM40,TIMM44,SLC25A6,RUVBL1,TIMM21,TIMM50,WBP11,PMPCA,AFG3L2,NMT1,COX18,POLR3A,PDCD5,U2AF2,UGCG,HSPA4,PMAIP1,BAG4,PSMB7,STARD7,TOMM70,TIMM10,TIMM9
GO:0051170	nuclear import	0.00039	1	0.008734	0.08266	40	321	ADAR,IPO8,IPO7,RBM22,NOP58,NUP133,SMN2,SNRPD1,SNRPF,MBTPS1,STAT3,NUP205,ZPR1,RGPD2,CBLB,GSK3B,TGFBR1,THRA,PRDX1,TNPO3,DDX58,PHB2,KPNA6,TXN,PIK3R1,HSP90AB1,XBP1,GEMIN5,MAPK14,PPP3CA,NUP93,KEAP1,KPNB1,KPNA4,TNPO1,IPO5,RAN,GEMIN7,SMAD4,IPO11
GO:0006106	fumarate metabolic process	0.0003901	1	0.008734	0.08266	3	3	FH,GOT1,GOT2
GO:0001732	formation of cytoplasmic translation initiation complex	0.0003901	1	0.008734	0.08266	3	3	EIF3A,EIF3D,CDC123
GO:0000453	enzyme-directed rRNA 2'-O-methylation	0.0003901	1	0.008734	0.08266	3	3	MRM1,FTSJ3,MRM2
GO:0070488	neutrophil aggregation	0.0003901	1	0.008734	0.08266	3	3	S100A8,S100A9,GSTP1
GO:0071460	cellular response to cell-matrix adhesion	0.0003901	1	0.008734	0.08266	3	3	MMP9,SKP2,GSTP1
GO:0000451	rRNA 2'-O-methylation	0.0003901	1	0.008734	0.08266	3	3	MRM1,FTSJ3,MRM2
GO:0070681	glutaminyl-tRNAGln biosynthesis via transamidation	0.0003901	1	0.008734	0.08266	3	3	GATC,GATB,QRSL1
GO:1990253	cellular response to leucine starvation	0.0003901	1	0.008734	0.08266	3	3	IMPACT,GCN1,EIF2AK4
GO:0044270	cellular nitrogen compound catabolic process	0.0003965	1	0.008851	0.08376	53	462	RPL29,RPS8,ETF1,RPS23,RPS25,RPS27A,CNOT6,AHCY,CNOT11,XRN2,DCPS,LIN28B,ERI1,DIS3,NT5C2,MYC,PABPC4,NCF2,STAT3,BLVRA,RNPS1,SUPV3L1,ZPR1,APOBEC3C,DICER1,CNOT9,AIFM1,QPRT,PDE3B,EXOSC8,PNPT1,HPRT1,DCTPP1,EXOSC9,POLR2D,ZC3HAV1,EIF3E,PTBP1,NUDT12,DFFA,THRAP3,KPNB1,ENTPD7,EXOSC3,UPF1,DERA,LRPPRC,ABCE1,MRTO4,SLIRP,RPL9,RPL12,HNRNPR
GO:0009060	aerobic respiration	0.0004175	1	0.009264	0.08767	13	63	ACO2,MDH2,FH,SDHD,SUCLG2,SUCLG1,SUCLA2,OXA1L,PDHA1,PMPCB,IDH3B,CS,DLAT
GO:0019674	NAD metabolic process	0.0004175	1	0.009264	0.08767	13	63	MDH2,ALDOA,GPI,QPRT,PGK1,PKLR,PKM,IDH3B,NUDT12,LDHA,LDHB,NAMPT,ENO1
GO:0000097	sulfur amino acid biosynthetic process	0.0004367	1	0.009659	0.09141	7	21	AHCY,MTHFD1,MTR,CBS,ENOPH1,CTH,EIF2B1
GO:0006754	ATP biosynthetic process	0.0004452	1	0.009818	0.09292	11	48	ALDOA,ATP5F1A,MYC,ATP5PB,ATP5MC1,ATP5PF,STAT3,ATP6V0A2,PKLR,PKM,ATP5MF
GO:0090263	positive regulation of canonical Wnt signaling pathway	0.0004687	1	0.01023	0.09682	20	124	LRRK2,LGR4,RPS27A,PSME4,THRA,PSMF1,PSMA1,PSMA2,PSMA6,PSMB2,PSMB5,PSMB7,PSMC4,PSMC5,PSMD3,PSMD7,PSMD11,PSME2,LRP6,PSME3
GO:0006406	mRNA export from nucleus	0.0004694	1	0.01023	0.09682	18	106	SEH1L,THOC5,NDC1,RBMX2,NUP133,CPSF3,NUP205,RNPS1,SUPT6H,CPSF2,DDX19B,U2AF2,AGFG1,POLR2D,NUP93,SLBP,UPF1,DDX39A
GO:0071427	mRNA-containing ribonucleoprotein complex export from nucleus	0.0004694	1	0.01023	0.09682	18	106	SEH1L,THOC5,NDC1,RBMX2,NUP133,CPSF3,NUP205,RNPS1,SUPT6H,CPSF2,DDX19B,U2AF2,AGFG1,POLR2D,NUP93,SLBP,UPF1,DDX39A
GO:0071375	cellular response to peptide hormone stimulus	0.0004709	1	0.01023	0.09682	40	324	MAX,RPS6KB1,ADCY7,RAB8A,FBN1,CCL2,ATP6V0D2,SGK1,SLC25A33,ANXA5,APEX1,NCOA5,ATP6V1H,SMARCC1,AHCYL1,STAT3,GOT1,RAB31,GRB2,GSTP1,CDC6,ATP6V0A2,PDE3B,CISH,PIK3R1,UCHL3,PKLR,NUCKS1,EEF2K,XBP1,PPAT,IGF1R,PRKAR2A,PRKCA,APPL1,PRKDC,PTPN11,NAMPT,EIF4EBP2,LYN
GO:0006623	protein targeting to vacuole	0.000471	1	0.01023	0.09682	9	34	PIK3R4,TRAPPC8,AP3M1,BECN1,VAMP7,GCC2,RAB7A,LAMP2,VPS36
GO:0044743	protein transmembrane import into intracellular organelle	0.0004726	1	0.01023	0.09686	10	41	TOMM40,TIMM44,TIMM21,TIMM50,AFG3L2,PDCD5,PEX12,HSPA4,TIMM10,TIMM9
GO:0051188	cofactor biosynthetic process	0.0004781	1	0.01027	0.09715	26	181	GPHN,ACLY,FECH,THEM4,MTHFD1,ATIC,COASY,COQ3,NDUFA9,SUCLA2,NFU1,MOCS3,LIAS,HACD2,NFS1,QPRT,PDHA1,PDK1,PDK3,ACOT9,MTHFD1L,IREB2,CIAPIN1,DLAT,NAMPT,COQ7
GO:0010257	NADH dehydrogenase complex assembly	0.0004797	1	0.01027	0.09715	12	56	TIMMDC1,TIMM21,COA1,TMEM126B,NDUFA1,NDUFA9,NDUFAB1,NDUFB5,NDUFS1,OXA1L,AIFM1,NDUFAF1
GO:0032981	mitochondrial respiratory chain complex I assembly	0.0004797	1	0.01027	0.09715	12	56	TIMMDC1,TIMM21,COA1,TMEM126B,NDUFA1,NDUFA9,NDUFAB1,NDUFB5,NDUFS1,OXA1L,AIFM1,NDUFAF1
GO:0097031	mitochondrial respiratory chain complex I biogenesis	0.0004797	1	0.01027	0.09715	12	56	TIMMDC1,TIMM21,COA1,TMEM126B,NDUFA1,NDUFA9,NDUFAB1,NDUFB5,NDUFS1,OXA1L,AIFM1,NDUFAF1
GO:0016053	organic acid biosynthetic process	0.0005206	1	0.01103	0.1044	39	315	ABAT,ACADM,ACLY,ACSM3,AHCY,HACD3,MTHFD1,ASNS,MTR,ATIC,BCAT1,NDUFAB1,SUCLA2,GLS,GOT1,GOT2,LIAS,OAT,HACD2,CBS,PARK7,ENOPH1,PKLR,PKM,PYCR2,GSTO1,ASNSD1,PSAT1,MTHFD1L,XBP1,VCAN,CTH,PHGDH,DHPS,RDH10,LDHA,LDHB,EIF2B1,LTA4H
GO:0046394	carboxylic acid biosynthetic process	0.0005206	1	0.01103	0.1044	39	315	ABAT,ACADM,ACLY,ACSM3,AHCY,HACD3,MTHFD1,ASNS,MTR,ATIC,BCAT1,NDUFAB1,SUCLA2,GLS,GOT1,GOT2,LIAS,OAT,HACD2,CBS,PARK7,ENOPH1,PKLR,PKM,PYCR2,GSTO1,ASNSD1,PSAT1,MTHFD1L,XBP1,VCAN,CTH,PHGDH,DHPS,RDH10,LDHA,LDHB,EIF2B1,LTA4H
GO:0034250	positive regulation of cellular amide metabolic process	0.0005214	1	0.01103	0.1044	20	125	ABCF1,RPS6KB1,IMPACT,NSMAF,SYNCRIP,NSUN4,CDK5RAP1,EIF2B5,C1QBP,LARP1,THBS1,CDK4,CIRBP,GUF1,POLR2D,PTBP1,DDX3X,RBM3,EEF2,EIF2AK4
GO:0006354	DNA-templated transcription, elongation	0.0005214	1	0.01103	0.1044	20	125	ZNF326,POLR1B,NELFCD,THOC5,SSRP1,TWISTNB,SUPT4H1,SUPT6H,TAF5,TAF12,TAF13,GTF2H1,POLR1E,SUPT16H,TAF1D,POLR1A,POLR2D,CTR9,ELP3,ELP2
GO:0016556	mRNA modification	0.0005538	1	0.01168	0.1105	6	16	SYNCRIP,DNAJB11,CMTR1,BAG4,VIRMA,DKC1
GO:0070585	protein localization to mitochondrion	0.0005736	1	0.01199	0.1135	27	193	LRRK2,TOMM5,MIPEP,PARL,TOMM40,TIMM44,SLC25A6,RUVBL1,TIMM21,TIMM50,WBP11,PMPCA,AFG3L2,NMT1,COX18,POLR3A,PDCD5,U2AF2,UGCG,HSPA4,PMAIP1,BAG4,PSMB7,STARD7,TOMM70,TIMM10,TIMM9
GO:0009201	ribonucleoside triphosphate biosynthetic process	0.0005736	1	0.01199	0.1135	13	65	ALDOA,ATP5F1A,MYC,ATP5PB,ATP5MC1,ATP5PF,STAT3,ATP6V0A2,CTPS2,PKLR,PKM,ATP5MF,CTPS1
GO:0051054	positive regulation of DNA metabolic process	0.0005762	1	0.01199	0.1135	28	203	ABRAXAS1,APEX1,CCT7,CCT4,CCT2,MAPKAPK5,CCT5,CCT8,MYC,DHX36,ATR,NBN,NEK2,TCP1,TERF2,GSK3B,MSH6,CCT3,PFN1,ERCC8,NABP2,BRCC3,IGF1R,CHTF8,DKC1,GNL3,EXOSC3,RFC2
GO:0042176	regulation of protein catabolic process	0.0005769	1	0.01199	0.1135	48	414	LRRK2,RPS27A,SCO1,ANAPC5,LCMT1,CUL4B,CUL1,UBE2J1,TRIB2,SGTA,MSN,SMARCC1,CDC23,ADAM9,PSME4,BTRC,CBLB,GSK3B,SF3B3,CHEK2,CTSC,PARK7,PHB,UBE3A,ANAPC1,HSP90AB1,PSMF1,RCHY1,ANAPC15,XBP1,PSMA1,PSMA2,PSMA6,PSMB2,PSMB5,PSMB7,PSMC4,PSMC5,PSMD3,PSMD7,PSMD11,PSME2,KEAP1,RAB7A,ITCH,SERPINB1,PSME3,SMAD4
GO:0009896	positive regulation of catabolic process	0.0005769	1	0.01199	0.1135	48	414	LRRK2,RPS27A,ANAPC5,CUL4B,CUL1,TRIB2,SGTA,MSN,TBK1,BECN1,CDC23,MYC,ADAM9,PSME4,SUPV3L1,BTRC,PIM2,LARP1,CBLB,GSK3B,CTSC,PARK7,PNPT1,ANAPC1,PSMF1,RCHY1,ANAPC15,XBP1,ZC3HAV1,PSMA1,PSMA2,PSMA6,PSMB2,PSMB5,PSMB7,PSMC4,PSMC5,PSMD3,PSMD7,PSMD11,PSME2,KEAP1,RAB7A,ITCH,UPF1,PSME3,EIF2AK4,HNRNPR
GO:0001736	establishment of planar polarity	0.0005791	1	0.012	0.1136	20	126	RPS27A,MLLT3,PSME4,PFN1,PSMF1,PSMA1,PSMA2,PSMA6,PSMB2,PSMB5,PSMB7,PSMC4,PSMC5,PSMD3,PSMD7,PSMD11,PSME2,FZD3,LRP6,PSME3
GO:0006188	IMP biosynthetic process	0.0005834	1	0.01206	0.1141	5	11	PAICS,ATIC,PFAS,HPRT1,PPAT
GO:0072666	establishment of protein localization to vacuole	0.0005944	1	0.01225	0.1159	9	35	PIK3R4,TRAPPC8,AP3M1,BECN1,VAMP7,GCC2,RAB7A,LAMP2,VPS36
GO:0042775	mitochondrial ATP synthesis coupled electron transport	0.000609	1	0.01251	0.1184	15	82	UQCRHL,NDUFA1,NDUFA9,NDUFAB1,NDUFB5,NDUFS1,PARK7,COX5A,UQCRFS1,PMPCB,COX6A1,COX7B,COX7C,NDUFAF1,COQ7
GO:0016567	protein ubiquitination	0.0006167	1	0.01264	0.1196	80	781	MARCH2,LRRK2,BFAR,RPS27A,BRAP,MIB1,ANAPC5,CUL4B,CUL2,CUL1,UBE2J1,TRIB2,DCUN1D5,SKP2,MARCH3,KLHL15,HLTF,CCNB1IP1,CDC23,BACH1,KBTBD8,NAIP,BLMH,PSME4,PRPF19,HERC2,BTRC,USP22,CBL,CBLB,CCNF,TGFBR1,CDK8,GTPBP4,PARK7,MKRN2,PEX12,TRIP12,CISH,ERCC8,UBA1,UBE3A,ANAPC1,ANAPC13,HSP90AB1,PSMF1,DERL1,RCHY1,ANAPC15,CTR9,DZIP3,DCAF1,PSMA1,PSMA2,PSMA6,PSMB2,PSMB5,PSMB7,FBXL12,PSMC4,PSMC5,PSMD3,PSMD7,PSMD11,PSME2,K…
GO:0007164	establishment of tissue polarity	0.0006423	1	0.01312	0.1242	20	127	RPS27A,MLLT3,PSME4,PFN1,PSMF1,PSMA1,PSMA2,PSMA6,PSMB2,PSMB5,PSMB7,PSMC4,PSMC5,PSMD3,PSMD7,PSMD11,PSME2,FZD3,LRP6,PSME3
GO:0050852	T cell receptor signaling pathway	0.0006605	1	0.01346	0.1274	25	175	RPS27A,CUL1,PSME4,BTRC,NRAS,CBLB,CHUK,PIK3R1,CCR7,PSMF1,PSMA1,PSMA2,PSMA6,PSMB2,PSMB5,PSMB7,PSMC4,PSMC5,PSMD3,PSMD7,PSMD11,PSME2,PTPRJ,ELF1,PSME3
GO:0019439	aromatic compound catabolic process	0.000726	1	0.01475	0.1396	53	474	RPL29,RPS8,ETF1,RPS23,RPS25,RPS27A,CNOT6,FAH,AHCY,CNOT11,XRN2,DCPS,LIN28B,ERI1,DIS3,NT5C2,MYC,PABPC4,NCF2,STAT3,BLVRA,RNPS1,SUPV3L1,ZPR1,APOBEC3C,DICER1,CNOT9,AIFM1,PDE3B,EXOSC8,PNPT1,HPRT1,DCTPP1,EXOSC9,POLR2D,ZC3HAV1,EIF3E,PTBP1,NUDT12,DFFA,THRAP3,KPNB1,ENTPD7,EXOSC3,UPF1,DERA,LRPPRC,ABCE1,MRTO4,SLIRP,RPL9,RPL12,HNRNPR
GO:0043633	polyadenylation-dependent RNA catabolic process	0.000752	1	0.01519	0.1438	4	7	EXOSC8,PNPT1,EXOSC9,EXOSC3
GO:0000055	ribosomal large subunit export from nucleus	0.000752	1	0.01519	0.1438	4	7	RRS1,RAN,SDAD1,NMD3
GO:0009108	coenzyme biosynthetic process	0.0007565	1	0.01524	0.1442	21	138	GPHN,ACLY,THEM4,MTHFD1,ATIC,COASY,COQ3,NDUFA9,MOCS3,LIAS,HACD2,NFS1,QPRT,PDHA1,PDK1,PDK3,ACOT9,MTHFD1L,DLAT,NAMPT,COQ7
GO:0019693	ribose phosphate metabolic process	0.0007746	1	0.01556	0.1473	61	566	GPHN,LRRK2,ADCY7,BPNT1,ALDOA,UQCRHL,MPI,SLC25A33,PAICS,NT5C2,ATIC,COASY,ATP1B1,ATP5F1A,MYC,ATP5PB,ATP5MC1,ATP5PF,CMPK1,NDUFA1,NDUFA9,NDUFAB1,NDUFB5,NDUFS1,STAT3,MOCS3,GPI,NFS1,CBS,THBS1,TKT,ATP6V0A2,PDE3B,PARK7,PFAS,PGK1,CTPS2,COX5A,HPRT1,PKLR,PKM,TJP2,UMPS,UQCRFS1,PMPCB,COX6A1,COX7B,COX7C,ATP5MF,PPAT,PRKCA,CTPS1,IMPDH2,SLC35B2,COA6,LDHA,PPIF,DERA,NDUFAF1,ENO1,COQ7
GO:0043434	response to peptide hormone	0.0007827	1	0.01568	0.1484	50	442	MAX,RPS6KB1,ADCY7,RAB8A,SORT1,FBN1,CCL2,ATP6V0D2,SGK1,SLC25A33,ANXA5,APEX1,NCOA5,ATP6V1H,SMARCC1,ATP2A2,AHCYL1,STAT3,EIF2B3,EIF2B5,GOT1,RAB31,GRB2,GSK3B,GSTP1,CDC6,ATP6V0A2,PDE3B,CISH,PIK3R1,UCHL3,PKLR,PKM,NUCKS1,EEF2K,PLD1,XBP1,PPAT,IGF1R,PRKAR2A,PRKCA,APPL1,PRKDC,PTPN11,NAMPT,EIF2B1,EIF4EBP2,LRP6,LTA4H,LYN
GO:0044033	multi-organism metabolic process	0.0007868	1	0.01572	0.1487	28	207	SEH1L,RPL29,RPS8,RPS23,RPS25,RPS27A,EIF3L,NELFCD,MON1B,NDC1,NUP133,EIF3A,EIF3B,EIF3D,EIF3G,SSB,NUP205,SUPT4H1,CHD1,PFN1,APOBEC3D,POLR2D,NUP93,CXCL8,PTBP1,EIF2AK4,RPL9,RPL12
GO:0019080	viral gene expression	0.0007887	1	0.01572	0.1487	26	187	SEH1L,RPL29,RPS8,RPS23,RPS25,RPS27A,EIF3L,NELFCD,MON1B,NDC1,NUP133,EIF3A,EIF3B,EIF3D,EIF3G,SSB,NUP205,SUPT4H1,CHD1,PFN1,POLR2D,NUP93,PTBP1,EIF2AK4,RPL9,RPL12
GO:0000027	ribosomal large subunit assembly	0.0008118	1	0.01613	0.1527	7	23	RPF2,RPF1,MRPL11,MRPL20,MRTO4,RSL24D1,RPL12
GO:0033044	regulation of chromosome organization	0.0008168	1	0.01619	0.1532	37	301	ERCC4,LCMT1,CCT7,CCT4,CCT2,MAPKAPK5,CCT5,CCT8,CENPV,BECN1,CDC23,MYC,DHX36,ATR,NBN,RUVBL2,NEK2,SUPT6H,TCP1,TERF2,CDC6,CCT3,HMGA1,TRIP12,NABP2,EID1,ASF1A,ANAPC15,XBP1,XRCC5,CTR9,DKC1,PINX1,PIH1D1,GNL3,NAT10,SMAD4
GO:0042455	ribonucleoside biosynthetic process	0.0008988	1	0.01776	0.1681	19	121	ALDOA,COASY,ATP5F1A,MYC,ATP5PB,ATP5MC1,ATP5PF,CMPK1,STAT3,ATP6V0A2,CTPS2,HPRT1,PKLR,PKM,UMPS,ATP5MF,CTPS1,IMPDH2,SLC35B2
GO:0043489	RNA stabilization	0.0009206	1	0.01809	0.1712	9	37	SYNCRIP,IGF2BP1,HNRNPA0,DICER1,CIRBP,MAPK14,PTBP1,DKC1,THRAP3
GO:0007080	mitotic metaphase plate congression	0.0009206	1	0.01809	0.1712	9	37	SEH1L,BECN1,CDC23,RRS1,SPDL1,PINX1,KPNB1,CHMP4B,CDCA8
GO:0002764	immune response-regulating signaling pathway	0.0009411	1	0.01841	0.1742	55	502	LGR4,ACTG1,RPS27A,TLR8,PIK3R4,FCGR1A,MNDA,WDFY1,CUL1,TBK1,NCKAP1,PSME4,C1QBP,SKAP2,BTRC,NRAS,GRB2,CBLB,CD14,HSP90B1,DDX58,CLEC7A,CHUK,PIK3R1,CCR7,HSP90AB1,PSMF1,CRK,PPP3CA,LSM14A,PUM1,CTSL,CTSS,ZC3HAV1,PSMA1,PSMA2,PSMA6,PSMB2,PSMB5,PSMB7,PSMC4,PSMC5,PSMD3,PSMD7,PSMD11,PSME2,PTPRJ,MAPKAPK3,KRAS,ITCH,ARPC5,ACTR2,ELF1,PSME3,LYN
GO:0032119	sequestering of zinc ion	0.0009416	1	0.01841	0.1742	5	12	S100A8,S100A9,SLC30A10,AP3D1,SLC30A7
GO:0009163	nucleoside biosynthetic process	0.0009583	1	0.01868	0.1768	20	131	ALDOA,COASY,ATP5F1A,MYC,ATP5PB,ATP5MC1,ATP5PF,CMPK1,STAT3,ATP6V0A2,TYMS,CTPS2,HPRT1,PKLR,PKM,UMPS,ATP5MF,CTPS1,IMPDH2,SLC35B2
GO:0001738	morphogenesis of a polarized epithelium	0.001005	1	0.01954	0.1849	21	141	RPS27A,MLLT3,MSN,PSME4,PFN1,PSMF1,PSMA1,PSMA2,PSMA6,PSMB2,PSMB5,PSMB7,PSMC4,PSMC5,PSMD3,PSMD7,PSMD11,PSME2,FZD3,LRP6,PSME3
GO:0009408	response to heat	0.001078	1	0.02091	0.1979	24	171	SEH1L,DNAJA2,RPS6KB1,CCL2,NDC1,NUP133,ATR,NUP205,EIF2B3,EIF2B5,GSK3B,THBS1,CD14,DNAJC7,PKLR,HSPA4,HSP90AB1,POLR2D,BAG4,BAG3,NUP93,EIF2B1,LYN,RPA2
GO:0009259	ribonucleotide metabolic process	0.001095	1	0.02118	0.2005	59	551	GPHN,LRRK2,ADCY7,BPNT1,ALDOA,UQCRHL,MPI,SLC25A33,PAICS,NT5C2,ATIC,COASY,ATP1B1,ATP5F1A,MYC,ATP5PB,ATP5MC1,ATP5PF,CMPK1,NDUFA1,NDUFA9,NDUFAB1,NDUFB5,NDUFS1,STAT3,MOCS3,GPI,NFS1,CBS,THBS1,ATP6V0A2,PDE3B,PARK7,PFAS,PGK1,CTPS2,COX5A,HPRT1,PKLR,PKM,TJP2,UMPS,UQCRFS1,PMPCB,COX6A1,COX7B,COX7C,ATP5MF,PPAT,PRKCA,CTPS1,IMPDH2,SLC35B2,COA6,LDHA,PPIF,NDUFAF1,ENO1,COQ7
GO:0045292	mRNA cis splicing, via spliceosome	0.001135	1	0.02182	0.2065	6	18	DCPS,RBM22,SNRPC,WBP11,WBP4,PRPF39
GO:0043558	regulation of translational initiation in response to stress	0.001135	1	0.02182	0.2065	6	18	IMPACT,FECH,EIF2B3,EIF2B5,PPP1R15B,EIF2AK4
GO:0010564	regulation of cell cycle process	0.001138	1	0.02183	0.2066	63	598	CEP76,RPS27A,CNOT6,PIK3R4,PRMT5,AIF1,ANAPC5,LCMT1,CUL4B,CUL1,CNOT11,SLC25A33,APEX1,APP,THOC5,CENPV,BECN1,TXLNG,CDC23,BCAT1,NBN,RCC2,NEK2,PSME4,PRPF19,BTRC,TERF2,CCNF,CCNG1,CNOT9,PEBP1,CHEK2,CDC6,CDK4,PHB2,ANAPC1,PLAGL1,PSMF1,ANAPC15,IGF1R,PRKDC,HMGN5,PSMA1,PSMA2,PSMA6,PSMB2,PSMB5,PSMB7,PSMC4,PSMC5,PSMD3,PSMD7,PSMD11,PSME2,DDX3X,TIPIN,ARID3A,CHMP4B,LMNB1,SENP2,PSME3,RPA2,CSPP1
GO:1901659	glycosyl compound biosynthetic process	0.001161	1	0.02221	0.2102	20	133	ALDOA,COASY,ATP5F1A,MYC,ATP5PB,ATP5MC1,ATP5PF,CMPK1,STAT3,ATP6V0A2,TYMS,CTPS2,HPRT1,PKLR,PKM,UMPS,ATP5MF,CTPS1,IMPDH2,SLC35B2
GO:1901653	cellular response to peptide	0.001209	1	0.02308	0.2184	40	340	MAX,RPS6KB1,ADCY7,RAB8A,FBN1,CCL2,ATP6V0D2,SGK1,SLC25A33,ANXA5,APEX1,NCOA5,ATP6V1H,SMARCC1,AHCYL1,STAT3,GOT1,RAB31,GRB2,GSTP1,CDC6,ATP6V0A2,PDE3B,CISH,PIK3R1,UCHL3,PKLR,NUCKS1,EEF2K,XBP1,PPAT,IGF1R,PRKAR2A,PRKCA,APPL1,PRKDC,PTPN11,NAMPT,EIF4EBP2,LYN
GO:0071806	protein transmembrane transport	0.001273	1	0.02424	0.2294	11	54	TOMM40,TIMM44,TIMM21,TIMM50,AFG3L2,PDCD5,PEX12,HSPA4,TOMM70,TIMM10,TIMM9
GO:1901361	organic cyclic compound catabolic process	0.001352	1	0.0254	0.2404	55	510	RPL29,RPS8,ETF1,RPS23,RPS25,RPS27A,CNOT6,FAH,AHCY,CNOT11,XRN2,DCPS,LIN28B,ERI1,DIS3,NT5C2,MYC,PABPC4,NCF2,STAT3,BLVRA,RNPS1,SUPV3L1,ZPR1,APOBEC3C,GOT2,DICER1,CNOT9,AIFM1,QPRT,PDE3B,EXOSC8,PNPT1,HPRT1,DCTPP1,EXOSC9,POLR2D,ZC3HAV1,EIF3E,PTBP1,NUDT12,DFFA,THRAP3,KPNB1,ENTPD7,EXOSC3,UPF1,DERA,LRPPRC,ABCE1,MRTO4,SLIRP,RPL9,RPL12,HNRNPR
GO:0009064	glutamine family amino acid metabolic process	0.001364	1	0.0254	0.2404	13	71	FAH,ASNS,GLS,GOT1,GOT2,OAT,PFAS,CTPS2,PYCR2,ASNSD1,PPAT,CTPS1,PHGDH
GO:0071047	polyadenylation-dependent mRNA catabolic process	0.001366	1	0.0254	0.2404	3	4	EXOSC8,PNPT1,EXOSC9
GO:0000491	small nucleolar ribonucleoprotein complex assembly	0.001366	1	0.0254	0.2404	3	4	NUFIP1,ZNHIT6,PIH1D1
GO:0000320	re-entry into mitotic cell cycle	0.001366	1	0.0254	0.2404	3	4	MYC,GSK3B,CCNF
GO:0000492	box C/D snoRNP assembly	0.001366	1	0.0254	0.2404	3	4	NUFIP1,ZNHIT6,PIH1D1
GO:0090666	scaRNA localization to Cajal body	0.001366	1	0.0254	0.2404	3	4	CCT4,CCT2,TCP1
GO:0000965	mitochondrial RNA 3'-end processing	0.001366	1	0.0254	0.2404	3	4	SUPV3L1,ELAC2,PNPT1
GO:0071042	nuclear polyadenylation-dependent mRNA catabolic process	0.001366	1	0.0254	0.2404	3	4	EXOSC8,PNPT1,EXOSC9
GO:0006986	response to unfolded protein	0.001376	1	0.02551	0.2414	24	174	BFAR,MBTPS2,CCL2,HSPA4L,EDEM3,ASNS,DNAJB11,MBTPS1,ERP44,FAF2,MYDGF,THBS1,PPP1R15B,HSP90B1,PIK3R1,HSPA4,CREB3L2,HSP90AB1,DERL1,XBP1,CTH,CXCL8,TMEM33,EIF2AK4
GO:0006882	cellular zinc ion homeostasis	0.001404	1	0.0259	0.2451	7	25	S100A8,S100A9,SLC30A10,SLC39A8,AP3D1,SLC39A6,SLC30A7
GO:0034661	ncRNA catabolic process	0.001404	1	0.0259	0.2451	7	25	LIN28B,DIS3,DICER1,EXOSC8,PNPT1,EXOSC9,EXOSC3
GO:0000459	exonucleolytic trimming involved in rRNA processing	0.001419	1	0.02599	0.2459	4	8	ERI1,EXOSC8,EXOSC9,EXOSC3
GO:0000447	endonucleolytic cleavage in ITS1 to separate SSU-rRNA from 5.8S rRNA and LSU-rRNA from tricistronic rRNA transcript (SSU-rRNA, 5.8S rRNA, LSU-rRNA)	0.001419	1	0.02599	0.2459	4	8	NOP14,RRS1,UTP20,FCF1
GO:0000467	exonucleolytic trimming to generate mature 3'-end of 5.8S rRNA from tricistronic rRNA transcript (SSU-rRNA, 5.8S rRNA, LSU-rRNA)	0.001419	1	0.02599	0.2459	4	8	ERI1,EXOSC8,EXOSC9,EXOSC3
GO:0045069	regulation of viral genome replication	0.001432	1	0.02616	0.2475	14	80	ADAR,HACD3,SRPK1,SRPK2,APOBEC3C,LARP1,DICER1,APOBEC3D,PPIB,CXCL8,ZC3HAV1,ILF3,DDX3X,EIF2AK4
GO:0009266	response to temperature stimulus	0.00144	1	0.02619	0.2478	30	236	SEH1L,NR2F6,ACADM,DNAJA2,RPS6KB1,CCL2,NDC1,NUP133,ATR,NUP205,EIF2B3,EIF2B5,GSK3B,THBS1,THRA,CD14,DNAJC7,CIRBP,PKLR,HSPA4,HSP90AB1,POLR2D,BAG4,BAG3,NUP93,RBM3,EIF2B1,EIF2AK4,LYN,RPA2
GO:0006107	oxaloacetate metabolic process	0.001441	1	0.02619	0.2478	5	13	ACLY,MDH2,GOT1,GOT2,CS
GO:0032728	positive regulation of interferon-beta production	0.001455	1	0.02637	0.2496	8	32	TLR8,POLR3B,TBK1,POLR3A,DDX58,IFNAR1,ZC3HAV1,DDX3X
GO:0090090	negative regulation of canonical Wnt signaling pathway	0.001486	1	0.02687	0.2543	23	165	RPS27A,MLLT3,CHD8,INVS,PSME4,GSK3B,PSMF1,MAPK14,PSMA1,PSMA2,PSMA6,PSMB2,PSMB5,PSMB7,PSMC4,PSMC5,PSMD3,PSMD7,PSMD11,PSME2,G3BP1,LRP6,PSME3
GO:1901605	alpha-amino acid metabolic process	0.00149	1	0.02688	0.2544	31	247	FAH,AHCY,MTHFD1,ASNS,MTR,ATIC,AHCYL1,GLS,GOT1,GOT2,OAT,CBS,KYAT3,CARNMT1,PARK7,PFAS,ENOPH1,TXNRD1,TYMS,SLC25A32,CTPS2,PYCR2,ASNSD1,PSAT1,MTHFD1L,PPAT,CTH,CTPS1,PHGDH,DHPS,EIF2B1
GO:0032481	positive regulation of type I interferon production	0.001558	1	0.02804	0.2654	13	72	TLR8,POLR3B,POLR3E,TBK1,DHX36,POLR3A,CD14,DDX58,XRCC5,IFNAR1,PRKDC,ZC3HAV1,DDX3X
GO:2001252	positive regulation of chromosome organization	0.0016	1	0.02872	0.2718	22	156	CCT7,CCT4,CCT2,MAPKAPK5,CCT5,CCT8,BECN1,DHX36,ATR,NBN,RUVBL2,NEK2,TCP1,TERF2,CCT3,NABP2,XBP1,CTR9,DKC1,PIH1D1,GNL3,SMAD4
GO:0009066	aspartate family amino acid metabolic process	0.001738	1	0.03112	0.2945	11	56	AHCY,MTHFD1,ASNS,MTR,AHCYL1,GOT1,GOT2,ENOPH1,ASNSD1,PHGDH,EIF2B1
GO:0006402	mRNA catabolic process	0.001746	1	0.03117	0.295	28	218	RPL29,RPS8,ETF1,RPS23,RPS25,RPS27A,CNOT6,CNOT11,DCPS,ERI1,DIS3,RNPS1,SUPV3L1,CNOT9,EXOSC8,PNPT1,EXOSC9,POLR2D,ZC3HAV1,EIF3E,PTBP1,THRAP3,EXOSC3,UPF1,MRTO4,RPL9,RPL12,HNRNPR
GO:0065002	intracellular protein transmembrane transport	0.00175	1	0.03117	0.295	10	48	TOMM40,TIMM44,TIMM21,TIMM50,AFG3L2,PDCD5,PEX12,HSPA4,TIMM10,TIMM9
GO:0006281	DNA repair	0.001758	1	0.03124	0.2957	55	516	CHAF1B,ERCC4,RPS27A,ABRAXAS1,ZSWIM7,CUL4B,XRN2,USP28,APEX1,FANCM,RUVBL1,PPP4R2,HLTF,GINS2,ATR,BACH1,MEIOB,NBN,SSRP1,RUVBL2,ALKBH1,PSME4,PRPF19,HERC2,COPS6,NONO,BAZ1B,TERF2,PMS2CL,USP10,MSH6,GTF2H1,SUPT16H,CHEK2,HMGA1,TRIP12,ERCC8,NABP2,ASF1A,RCHY1,POLR2D,BCCIP,BRCC3,XRCC5,PRKDC,SMARCAD1,COPS7A,ACTR8,ASCC1,UPF1,RFC2,PALB2,ALKBH3,NHEJ1,RPA2
GO:0033120	positive regulation of RNA splicing	0.001802	1	0.03194	0.3023	8	33	SF3B4,RBM22,SMN2,ZPR1,PRPF19,U2AF2,PIK3R1,THRAP3
GO:1900182	positive regulation of protein localization to nucleus	0.001834	1	0.03244	0.307	20	138	CCT7,CCT4,CCT2,CCT5,CCT8,HNRNPM,ZPR1,TCP1,TGFBR1,DDX58,CCT3,PARK7,PIK3R1,HSP90AB1,XBP1,MAPK14,PPP3CA,PINX1,IPO5,SMAD4
GO:0030177	positive regulation of Wnt signaling pathway	0.001888	1	0.03322	0.3144	22	158	LRRK2,LGR4,RPS27A,MLLT3,PSME4,THRA,PSMF1,PSMA1,PSMA2,PSMA6,PSMB2,PSMB5,PSMB7,PSMC4,PSMC5,PSMD3,PSMD7,PSMD11,PSME2,ATP6AP2,LRP6,PSME3
GO:0016241	regulation of macroautophagy	0.001888	1	0.03322	0.3144	22	158	LRRK2,PARL,ATP6V0D2,ATP6V1H,RUVBL1,TBK1,BECN1,SNX5,WBP11,TBC1D12,PIM2,CAPNS1,LARP1,POLR3A,ATP6V0A2,PARK7,U2AF2,SNX6,VDAC1,POLDIP2,RAB7A,CHMP4B
GO:0006790	sulfur compound metabolic process	0.001898	1	0.03333	0.3154	45	404	ACLY,ACPP,BPNT1,MGST1,AHCY,ST3GAL2,THEM4,FAR2,MTHFD1,MTR,AHCYL1,SUCLG2,SUCLG1,SUCLA2,NFU1,GLO1,LIAS,HACD2,NFS1,CBS,GSR,GSTP1,HEXA,HEXB,PDHA1,PDK1,PDK3,ACOT9,SQOR,ENOPH1,B4GALT5,TXN,GGCT,TXN2,GSTO1,CS,HS2ST1,VCAN,CTH,SLC35B2,KEAP1,PHGDH,CIAPIN1,DLAT,EIF2B1
GO:0072384	organelle transport along microtubule	0.001913	1	0.03351	0.3171	12	65	UXT,COPG1,AP3M1,WDR43,VAMP7,AP3D1,OPA1,BLOC1S6,RAB1A,LAMP1,LRPPRC,RHOT1
GO:0043903	regulation of symbiosis, encompassing mutualism through parasitism	0.002	1	0.03494	0.3307	28	220	ADAR,MPO,HACD3,NELFCD,FUCA2,NBN,SRPK1,SRPK2,SUPT4H1,APOBEC3C,LARP1,DICER1,OSBP,CHD1,PFN1,APOBEC3D,DERL1,POLR2D,PPIB,CTSG,CXCL8,ZC3HAV1,ILF3,ITGAV,DDX3X,RAB7A,CHMP4B,EIF2AK4
GO:0006979	response to oxidative stress	0.002005	1	0.03494	0.3307	48	439	LRRK2,IMPACT,MGST1,AIF1,MMP9,MMP14,MPO,MPV17,ATRN,APEX1,APP,MTR,ATP2A2,ADAM9,STK26,NONO,LIAS,OLR1,GSK3B,GSR,GSTP1,THBS1,AIFM1,PPP1R15B,PRDX1,PDK1,PARK7,SLC7A11,CHUK,TXN,TXNRD1,ERCC8,PNPT1,CCR7,PYCR2,PRDX5,TXN2,XBP1,PRKCA,CYBB,PSMB5,ITGAV,KPNA4,LDHA,PPIF,EEF2,TRAP1,COQ7
GO:0035567	non-canonical Wnt signaling pathway	0.002047	1	0.0356	0.3369	22	159	RPS27A,MLLT3,NLK,PSME4,PFN1,PSMF1,PPP3CA,PSMA1,PSMA2,PSMA6,PSMB2,PSMB5,PSMB7,PSMC4,PSMC5,PSMD3,PSMD7,PSMD11,PSME2,FZD3,LRP6,PSME3
GO:0016073	snRNA metabolic process	0.002058	1	0.0357	0.3379	14	83	SNAPC5,INTS2,INTS13,INTS9,TAF8,TAF5,TAF13,INTS5,EXOSC8,NABP2,EXOSC9,POLR2D,DKC1,EXOSC3
GO:0006914	autophagy	0.002109	1	0.03644	0.3448	61	590	CHAF1B,DRAM1,LRRK2,OBSCN,RPS27A,TOMM5,KRCC1,PIK3R4,S100A8,S100A9,PARL,TOMM40,ATP6V0D2,ANXA5,ANXA7,ZCCHC17,TRAPPC8,ATP6V1H,RUVBL1,TBK1,ATP1B1,BECN1,SNRPD1,SNRPF,SNX5,WBP11,VAMP7,TBC1D12,ZNF681,PIM2,VPS39,CAPNS1,LARP1,POLR3A,CDC37,USP10,WDR45B,ATP6V0A2,PDK1,PARK7,U2AF2,SNX6,VDAC1,EI24,XBP1,CTSA,NUP93,POLDIP2,VPS33A,TOMM70,RAB7A,RAB1A,VMP1,GOPC,LAMP1,LAMP2,VPS36,CHMP4B,SNX14,EIF2AK4,NBR1
GO:0045324	late endosome to vacuole transport	0.002111	1	0.03644	0.3448	5	14	LRRK2,PIK3R4,BECN1,VPS39,VPS36
GO:1903311	regulation of mRNA metabolic process	0.002134	1	0.03675	0.3478	19	130	SF3B4,SAFB,SYNCRIP,AHCYL1,SRPK1,SRPK2,RNPS1,SUPT6H,C1QBP,PRPF19,U2AF2,PNPT1,BAG4,CTR9,ZC3HAV1,PTBP1,THRAP3,UPF1,HNRNPR
GO:0071897	DNA biosynthetic process	0.002203	1	0.03785	0.3582	27	211	RPS27A,CCT7,CCT4,CCT2,MAPKAPK5,CCT5,CCT8,MYC,ATR,NBN,NEK2,TCP1,TERF2,GSK3B,USP10,CCT3,PHB,TYMS,NABP2,RCHY1,CHTF8,DKC1,PINX1,RFC2,PALB2,NAT10,RPA2
GO:0044786	cell cycle DNA replication	0.002211	1	0.0379	0.3587	8	34	GINS2,ZPR1,TERF2,CHEK2,TIPIN,SLBP,UPF1,SENP2
GO:0030488	tRNA methylation	0.002288	1	0.03903	0.3694	7	27	NSUN4,TRMT1,PYURF,TRMT6,FTSJ1,NSUN2,TRMT61B
GO:0055069	zinc ion homeostasis	0.002288	1	0.03903	0.3694	7	27	S100A8,S100A9,SLC30A10,SLC39A8,AP3D1,SLC39A6,SLC30A7
GO:0010557	positive regulation of macromolecule biosynthetic process	0.002315	1	0.03939	0.3728	157	1777	ZNF326,ABCF1,RPS6KB1,IMPACT,LGR4,RPS27A,TLR8,NUFIP1,CITED2,S100A8,S100A9,SAFB,MBTPS2,CCL2,SYNCRIP,NSUN4,NAA15,NELFCD,CCT7,CCT4,CHD8,CCT2,CHD7,APP,MAPKAPK5,PCGF5,THOC5,ARID3B,MAPRE3,CCT5,TBK1,HLTF,CDK5RAP1,CCT8,SMARCC1,NCOA1,SOAT1,GABPA,MYC,DHX36,ATR,BEX1,BACH1,NCL,RAD54L2,RUVBL2,STAT3,NEK2,TAF8,SUPT4H1,SUPT6H,KLF9,ZPR1,EIF2B5,C1QBP,MYDGF,TAF12,GCN1,BTRC,USP22,PIM2,TCP1,LARP1,BAZ1B,WDR5,PIAS2,TFAM…
GO:1901652	response to peptide	0.002374	1	0.04018	0.3803	51	477	MAX,RPS6KB1,ADCY7,RAB8A,SORT1,FBN1,CCL2,ATP6V0D2,SGK1,SLC25A33,ANXA5,APEX1,NCOA5,ATP6V1H,SMARCC1,ATP2A2,AHCYL1,STAT3,EIF2B3,EIF2B5,GOT1,RAB31,GRB2,GSK3B,GSTP1,CDC6,ATP6V0A2,PDE3B,CISH,PIK3R1,UCHL3,PKLR,PKM,NUCKS1,EEF2K,PLD1,XBP1,PPAT,MAPK14,IGF1R,PRKAR2A,PRKCA,APPL1,PRKDC,PTPN11,NAMPT,EIF2B1,EIF4EBP2,LRP6,LTA4H,LYN
GO:0006610	ribosomal protein import into nucleus	0.002411	1	0.04018	0.3803	4	9	KPNB1,TNPO1,IPO5,IPO11
GO:1900864	mitochondrial RNA modification	0.002411	1	0.04018	0.3803	4	9	CDK5RAP1,MTO1,TRIT1,TRMT61B
GO:0070900	mitochondrial tRNA modification	0.002411	1	0.04018	0.3803	4	9	CDK5RAP1,MTO1,TRIT1,TRMT61B
GO:0034982	mitochondrial protein processing	0.002411	1	0.04018	0.3803	4	9	LRRK2,MIPEP,PMPCA,AFG3L2
GO:0006108	malate metabolic process	0.002411	1	0.04018	0.3803	4	9	MDH2,ME2,FH,KEAP1
GO:0033750	ribosome localization	0.002411	1	0.04018	0.3803	4	9	RRS1,RAN,SDAD1,NMD3
GO:0006449	regulation of translational termination	0.002411	1	0.04018	0.3803	4	9	RIDA,ETF1,UPF1,OGFOD1
GO:0000054	ribosomal subunit export from nucleus	0.002411	1	0.04018	0.3803	4	9	RRS1,RAN,SDAD1,NMD3
GO:0016236	macroautophagy	0.00249	1	0.0414	0.3918	46	421	CHAF1B,LRRK2,OBSCN,RPS27A,TOMM5,KRCC1,PIK3R4,PARL,TOMM40,ATP6V0D2,ANXA5,ZCCHC17,TRAPPC8,ATP6V1H,RUVBL1,TBK1,ATP1B1,BECN1,SNRPD1,SNRPF,SNX5,WBP11,VAMP7,TBC1D12,ZNF681,PIM2,CAPNS1,LARP1,POLR3A,CDC37,WDR45B,ATP6V0A2,PDK1,PARK7,U2AF2,SNX6,VDAC1,NUP93,POLDIP2,VPS33A,TOMM70,RAB7A,RAB1A,CHMP4B,SNX14,NBR1
GO:0000075	cell cycle checkpoint	0.002512	1	0.04167	0.3943	29	234	RPS27A,CNOT6,ABRAXAS1,LCMT1,CNOT11,USP28,THOC5,ATR,BCAT1,NBN,PRPF19,CCNG1,CCNG2,CNOT9,CHEK2,CDC6,NABP2,PLAGL1,ANAPC15,BRCC3,MAPK14,PRCC,PRKDC,NSUN2,SPDL1,PTPN11,TIPIN,ARID3A,RPA2
GO:0019637	organophosphate metabolic process	0.002538	1	0.04201	0.3976	108	1164	GPHN,PI4K2B,AGPAT5,ACPP,LRRK2,MDH2,ME2,ADCY7,PIK3R4,BPNT1,ALDOA,UQCRHL,MPI,PTPMT1,SLC25A33,PYURF,PAICS,GDE1,MTHFD1,NT5C2,ATIC,COASY,ATP1B1,ATP5F1A,MYC,ATP5PB,ATP5MC1,ATP5PF,CMPK1,MTMR1,NCF2,NDUFA1,NDUFA9,SUCLG1,NDUFAB1,NDUFB5,NDUFS1,STAT3,EFR3A,PHOSPHO1,MOCS3,GPI,GRB2,NFS1,CBS,THBS1,MTMR6,TKT,QPRT,ATP6V0A2,HEXB,PDE3B,PDHA1,PARK7,PFAS,PGK1,TXNRD1,TYMS,CTPS2,PLAA,COX5A,PIK3R1,HPRT1,PKLR,PKM,TJP2,UM…
GO:0015031	protein transport	0.002566	1	0.04237	0.401	170	1948	CCDC91,SEH1L,RPL29,ABAT,LIN7C,RPS8,LRRK2,LGR4,UBAP1,ACTN4,RPS23,RPS25,RPS27A,TOMM5,ADAR,TLR8,RAB8A,PIK3R4,STX18,XPO5,MIPEP,PARL,LYPLA1,CCL2,TOMM40,ATP6V0D2,TIMM44,SEC23B,UBE2J1,APPBP2,IPO8,IPO7,SLC25A5,COPG1,SLC25A6,CTDSPL2,ANXA5,ARFGEF2,ICK,TRAPPC8,AP3M1,ARCN1,C16orf70,RBM22,NOP58,ATP6V1H,NDC1,YKT6,RUVBL1,TIMM21,SLC16A1,TIMM50,NUP133,ATP1B1,RAB21,BECN1,SNX5,MBTPS1,AHCYL1,WBP11,GGA2,AUP1,ADAM9,SE…
GO:0044283	small molecule biosynthetic process	0.002606	1	0.04294	0.4063	59	572	ABAT,ACADM,ACLY,MDH2,ACSM3,AHCY,ALDOA,MPO,HSD17B7,HACD3,MTHFD1,ASNS,MTR,ATIC,BCAT1,COQ3,NDUFA9,NDUFAB1,SUCLA2,PHOSPHO1,GLS,GOT1,GOT2,GPI,RGPD2,LIAS,OAT,WDR5,HACD2,CBS,TKT,SLC35B4,PARK7,HMGCS1,PGK1,ENOPH1,PKLR,PKM,PYCR2,GSTO1,PCYT1B,ASNSD1,PSAT1,MTHFD1L,XBP1,CNBP,VCAN,NUS1,CTH,PHGDH,SDHAF3,DHPS,RDH10,LDHA,LDHB,EIF2B1,LTA4H,ENO1,COQ7
GO:0006090	pyruvate metabolic process	0.002617	1	0.04301	0.4071	17	113	ALDOA,MPI,SLC16A1,MYC,STAT3,GLO1,GPI,PDHA1,PDK1,PDK3,PGK1,PKLR,PKM,DLAT,LDHA,LDHB,ENO1
GO:0009206	purine ribonucleoside triphosphate biosynthetic process	0.002686	1	0.04403	0.4167	11	59	ALDOA,ATP5F1A,MYC,ATP5PB,ATP5MC1,ATP5PF,STAT3,ATP6V0A2,PKLR,PKM,ATP5MF
GO:0006270	DNA replication initiation	0.002691	1	0.04403	0.4167	8	35	MCM2,MCM3,MCM6,MCM7,MCM10,GINS2,NBN,CDC6
GO:0022904	respiratory electron transport chain	0.002738	1	0.04471	0.4231	16	104	UQCRHL,NDUFA1,NDUFA9,NDUFAB1,NDUFB5,NDUFS1,PARK7,COX5A,UQCRFS1,PMPCB,COX6A1,COX7B,COX7C,COA6,NDUFAF1,COQ7
GO:0000096	sulfur amino acid metabolic process	0.002838	1	0.04614	0.4366	9	43	AHCY,MTHFD1,MTR,AHCYL1,NFS1,CBS,ENOPH1,CTH,EIF2B1
GO:0006734	NADH metabolic process	0.002838	1	0.04614	0.4366	9	43	MDH2,ALDOA,GPI,PGK1,PKLR,PKM,IDH3B,LDHA,ENO1
GO:0008334	histone mRNA metabolic process	0.002866	1	0.04648	0.4398	7	28	ERI1,CPSF3,SNRPF,SSB,CPSF2,SLBP,UPF1
GO:0055114	oxidation-reduction process	0.002903	1	0.04698	0.4446	94	996	ACADM,ACO2,ACOX1,RPS27A,MDH2,ME2,MGST1,ALDH1B1,FH,ALDOA,UQCRHL,SDHD,MPO,HSD17B7,NOA1,APEX1,AGPS,FAR2,MTHFD1,KDSR,MYC,GBE1,NCF2,BCKDHB,NDUFA1,NDUFA9,SUCLG2,SUCLG1,NDUFAB1,SUCLA2,NDUFB5,NDUFS1,DUS1L,BLVRA,ALKBH1,GPI,DUS4L,CBS,GSK3B,GSR,OXA1L,AIFM1,GYG1,PRDX1,PDHA1,PARK7,SQOR,PGK1,TXN,TXNRD1,PHKA1,PNPT1,COX5A,PKLR,PKM,UQCRFS1,MTO1,PYCR2,PRDX5,TXN2,GSTO1,PMPCB,MTHFD1L,DHRS11,COX6A1,COX7B,COX7C,IDH3B,…
GO:0035966	response to topologically incorrect protein	0.002927	1	0.04726	0.4473	24	184	BFAR,MBTPS2,CCL2,HSPA4L,EDEM3,ASNS,DNAJB11,MBTPS1,ERP44,FAF2,MYDGF,THBS1,PPP1R15B,HSP90B1,PIK3R1,HSPA4,CREB3L2,HSP90AB1,DERL1,XBP1,CTH,CXCL8,TMEM33,EIF2AK4
GO:0050667	homocysteine metabolic process	0.002982	1	0.04804	0.4546	5	15	AHCY,MTHFD1,MTR,CBS,CTH
GO:0031570	DNA integrity checkpoint	0.003027	1	0.0485	0.459	22	164	RPS27A,CNOT6,ABRAXAS1,CNOT11,USP28,THOC5,ATR,BCAT1,NBN,PRPF19,CCNG1,CNOT9,CHEK2,CDC6,PLAGL1,BRCC3,MAPK14,PRKDC,PTPN11,TIPIN,ARID3A,RPA2
GO:0006606	protein import into nucleus	0.00303	1	0.0485	0.459	35	302	ADAR,IPO8,IPO7,RBM22,NOP58,NUP133,MBTPS1,STAT3,NUP205,ZPR1,RGPD2,CBLB,GSK3B,TGFBR1,THRA,PRDX1,TNPO3,DDX58,PHB2,KPNA6,TXN,PIK3R1,HSP90AB1,XBP1,MAPK14,PPP3CA,NUP93,KEAP1,KPNB1,KPNA4,TNPO1,IPO5,RAN,SMAD4,IPO11
GO:0051248	negative regulation of protein metabolic process	0.003031	1	0.0485	0.459	109	1183	RIDA,LRRK2,CD109,IMPACT,RPS27A,ADAR,CNOT6,XPO5,SCO1,MMP9,ANAPC5,LCMT1,SYNCRIP,UBE2J1,TRIB2,LIN28B,APP,NIFK,IGF2BP1,IGF2BP3,CDK5RAP1,SMARCC1,EIF3A,CDC23,MYC,RRP1B,NAIP,PDCD4,STAT3,SUPT6H,EIF2B3,EIF2B5,C3,GPI,DICER1,GSK3B,PWP1,GSTP1,THBS1,SF3B3,CNOT9,PEBP1,PDCD5,PPP1R15B,GTPBP4,CORO1C,PARK7,SERPINF1,TRIP12,PHB,CIRBP,CISH,SERPINB6,SERPINI1,SNX6,ANAPC1,PIK3R1,PLAUR,PRDX5,HSPA4,ITM2A,HSP90AB1,PSMF1,AN…
GO:0000077	DNA damage checkpoint	0.003051	1	0.04872	0.461	21	154	RPS27A,CNOT6,ABRAXAS1,CNOT11,USP28,THOC5,ATR,BCAT1,NBN,PRPF19,CCNG1,CNOT9,CHEK2,PLAGL1,BRCC3,MAPK14,PRKDC,PTPN11,TIPIN,ARID3A,RPA2
GO:0009145	purine nucleoside triphosphate biosynthetic process	0.003082	1	0.04905	0.4642	11	60	ALDOA,ATP5F1A,MYC,ATP5PB,ATP5MC1,ATP5PF,STAT3,ATP6V0A2,PKLR,PKM,ATP5MF
GO:0050778	positive regulation of immune response	0.003086	1	0.04905	0.4642	67	671	LGR4,ACTG1,RPS27A,TLR8,PIK3R4,FCGR1A,MNDA,WDFY1,CUL1,POLR3B,TBK1,NCKAP1,PSME4,VAMP7,C1QBP,C3,SKAP2,BTRC,NRAS,GRB2,CBLB,MSH6,CD14,HSP90B1,DDX58,VSIG4,PHB2,CLEC7A,CHUK,PHB,PIK3R1,CCR7,HSP90AB1,PSMF1,XBP1,CRK,LSM14A,PUM1,CTSG,CTSL,CTSS,PROS1,ZC3HAV1,PSMA1,PSMA2,PSMA6,PSMB2,PSMB5,PSMB7,PSMC4,PSMC5,PSMD3,PSMD7,PSMD11,PSME2,PTPRJ,MAPKAPK3,KRAS,ITCH,EXOSC3,LAMP1,ARPC5,ACTR2,ELF1,PSME3,EIF2AK4,LYN
GO:0051053	negative regulation of DNA metabolic process	0.003157	1	0.04998	0.473	17	115	ERCC4,ATR,NBN,TERF2,MSH6,CHEK2,CDC6,GTPBP4,TRIP12,APOBEC3D,XRCC5,ZNF91,DFFA,TIPIN,PINX1,GMNN,NAT10
GO:0048285	organelle fission	0.003158	1	0.04998	0.473	64	636	SEH1L,MCMBP,ERCC4,ACOX1,LRRK2,SKA2,PRMT5,ANAPC5,LCMT1,FANCM,MAPRE3,NDC1,RUVBL1,HAUS1,INTS13,CENPV,CCNB1IP1,BECN1,NUDC,CDC23,MEIOB,TUBGCP2,TUBGCP4,RCC2,NEK2,NEK3,RRS1,TIMELESS,PIM2,KATNA1,OPA1,CCNF,CCNG1,CCNG2,MSH6,PEBP1,CHEK2,CDC6,CDC25A,NOLC1,PHB2,ANAPC1,MIEF1,ANAPC13,WEE1,ANAPC15,AHCTF1,BRCC3,IGF1R,CENPH,NSUN2,SPDL1,CHTF8,TIPIN,NCAPD2,PINX1,KPNB1,RAN,ACTR8,CHMP4B,CDCA8,REEP3,ACTR2,ARL8B

## Sheet: GO_BP_AB
ID	Name	p-value	q-value Bonferroni	q-value FDR B&H	q-value FDR B&Y	Hit Count in Query List	Hit Count in Genome	Hit in Query List
GO:0019755	one-carbon compound transport	5.672e-06	0.01765	0.01421	0.1225	4	17	CA2,AQP1,AQP3,SLC14A1
GO:0070293	renal absorption	9.135e-06	0.02843	0.01421	0.1225	4	19	AQP1,AQP3,AKR1C3,HBB
GO:0015669	gas transport	2.041e-05	0.06351	0.02117	0.1825	4	23	CA2,AQP1,HBM,HBB
GO:0002822	regulation of adaptive immune response based on somatic recombination of immune receptors built from immunoglobulin superfamily domains	4.539e-05	0.1413	0.02685	0.2314	7	131	HLA-B,ADA,CLC,FCER1A,PNP,IL23A,NDFIP1
GO:0046124	purine deoxyribonucleoside catabolic process	5.176e-05	0.1611	0.02685	0.2314	2	2	ADA,PNP
GO:0014916	regulation of lung blood pressure	5.176e-05	0.1611	0.02685	0.2314	2	2	GCH1,BMPR2
GO:0070231	T cell apoptotic process	7.115e-05	0.2214	0.03079	0.2654	5	60	ADA,CLC,PNP,FAS,LGALS3
GO:0002819	regulation of adaptive immune response	7.916e-05	0.2463	0.03079	0.2654	7	143	HLA-B,ADA,CLC,FCER1A,PNP,IL23A,NDFIP1
GO:0009215	purine deoxyribonucleoside triphosphate metabolic process	9.883e-05	0.3075	0.03228	0.2782	3	13	ADA,PNP,GUK1
GO:0006952	defense response	0.0001088	0.3385	0.03228	0.2782	26	1651	HLA-B,ESR2,HLA-F,GBP3,GCH1,ADA,MAP3K5,FCER1A,MS4A2,IER3,HIST1H3B,IFIT1B,HERC6,CPA3,FAS,IFI27,IL23A,LGALS3,NDFIP1,JCHAIN,APOL3,HRH4,TNK2,XAF1,SERINC5,STOM
GO:0015850	organic hydroxy compound transport	0.0001189	0.37	0.03228	0.2782	9	262	AKR1C1,FCER1A,TSPO,AQP1,AQP3,LGALS3,SLC6A8,SLC22A16,ABCA5
GO:0002697	regulation of immune effector process	0.0001397	0.4348	0.03228	0.2782	12	466	HLA-B,CLC,FCER1A,MS4A2,HIST1H3B,IFIT1B,PNP,CPA3,IL23A,LGALS3,NDFIP1,STOM
GO:0030185	nitric oxide transport	0.0001534	0.4775	0.03228	0.2782	2	3	AQP1,HBB
GO:0046122	purine deoxyribonucleoside metabolic process	0.0001534	0.4775	0.03228	0.2782	2	3	ADA,PNP
GO:0009151	purine deoxyribonucleotide metabolic process	0.0001556	0.4841	0.03228	0.2782	3	15	ADA,PNP,GUK1
GO:0015696	ammonium transport	0.0002213	0.6887	0.04305	0.3711	6	119	ADA,FCER1A,AQP1,LGALS3,SLC6A8,SLC22A16
GO:0003014	renal system process	0.0002888	0.8989	0.04432	0.382	6	125	FAS,AQP1,AQP3,JCHAIN,AKR1C3,HBB
GO:0015701	bicarbonate transport	0.0003038	0.9454	0.04432	0.382	4	45	CA1,CA2,AQP1,HBB
GO:0009753	response to jasmonic acid	0.0003054	0.9505	0.04432	0.382	2	4	AKR1C1,AKR1C3
GO:0046121	deoxyribonucleoside catabolic process	0.0003054	0.9505	0.04432	0.382	2	4	ADA,PNP
GO:0071395	cellular response to jasmonic acid stimulus	0.0003054	0.9505	0.04432	0.382	2	4	AKR1C1,AKR1C3
GO:0071357	cellular response to type I interferon	0.0003133	0.9749	0.04432	0.382	5	82	HLA-B,HLA-F,IFIT1B,IFI27,XAF1
GO:0002824	positive regulation of adaptive immune response based on somatic recombination of immune receptors built from immunoglobulin superfamily domains	0.0003702	1	0.04504	0.3883	5	85	HLA-B,ADA,FCER1A,PNP,IL23A
GO:0002703	regulation of leukocyte mediated immunity	0.0003748	1	0.04504	0.3883	7	184	HLA-B,CLC,FCER1A,MS4A2,PNP,IL23A,NDFIP1
GO:0002706	regulation of lymphocyte mediated immunity	0.000387	1	0.04504	0.3883	6	132	HLA-B,CLC,FCER1A,PNP,IL23A,NDFIP1
GO:0070227	lymphocyte apoptotic process	0.0003908	1	0.04504	0.3883	5	86	ADA,CLC,PNP,FAS,LGALS3
GO:0034340	response to type I interferon	0.0003908	1	0.04504	0.3883	5	86	HLA-B,HLA-F,IFIT1B,IFI27,XAF1
GO:0002252	immune effector process	0.000411	1	0.04568	0.3938	16	851	HLA-B,GBP3,ADA,CLC,FCER1A,MS4A2,HIST1H3B,IFIT1B,PNP,CPA3,FAS,IL23A,LGALS3,NDFIP1,SERINC5,STOM

## Sheet: GO_MF_FL
ID	Name	p-value	q-value Bonferroni	q-value FDR B&H	q-value FDR B&Y	Hit Count in Query List	Hit Count in Genome	Hit in Query List
GO:0003723	RNA binding	3.494e-84	7.058e-81	7.058e-81	5.779e-80	345	1632	RIDA,RPL29,ZNF326,SF3B4,ABCF1,FBL,SMNDC1,MARS,MRM1,RPS8,ETF1,ACTN4,LRRC59,NOL10,RPS23,RPS25,RPS27A,MDH2,ADAR,TLR8,SCAF4,NUFIP1,LRRC47,CNOT6,FARSA,SAFB,UTP15,XPO5,NSA2,NAF1,EIF3L,RPF2,FECH,NUFIP2,NOL7,ALDOA,FKBP3,EIF3M,SYNCRIP,DUSP11,RPF1,NSUN4,XRN2,NAA15,MRPS28,NOP56,DCPS,NOP16,SLC25A5,RTCB,LIN28B,NOA1,ANXA7,EIF1AD,RPP30,TRMT1,MRPL13,PHF6,APEX1,CCT4,ZCCHC17,MRPL45,ERI1,API5,LYAR,TARS2,DDX55,DDX27…
GO:0017076	purine nucleotide binding	1.952e-12	3.943e-09	1.237e-09	1.013e-08	213	1879	GPHN,MKKS,PI4K2B,UBA5,ABCF1,MARS,ACLY,DNAJA2,RPS6KB1,LRRK2,OBSCN,ACTG1,MCM2,MCM3,MCM6,MCM7,WARS2,ADCY7,RAB8A,PIK3R4,FARSA,ACSM3,ATP8A1,ARL13B,AHCY,MERTK,POMK,TIMM44,UBE2J1,TRIB2,RTCB,HSPA4L,SGK1,NOA1,RHOBTB3,LARS,ICK,CCT7,CCT4,CHD8,CCT2,CHD7,TARS2,DDX55,FANCM,MAPKAPK5,DDX27,PAICS,YARS,GRPEL1,IARS2,GTPBP8,RUVBL1,CCT5,TSR1,MTHFD1,MTIF2,TBK1,ASNS,HLTF,CCT8,DHX32,COASY,ATP1B1,RAB21,ATP2A2,ATP5F1A,NLK…
GO:0008135	translation factor activity, RNA binding	1.983e-12	4.006e-09	1.237e-09	1.013e-08	29	90	ABCF1,ETF1,EIF3L,EIF3M,EIF1AD,MTIF2,EIF3A,EIF3B,EIF3C,EIF3D,EIF3G,EIF3I,EIF2B3,EIF2B5,EIF2S2,GCN1,GATB,TUFM,EEF2K,EIF4H,MRPL58,GFM1,EIF3E,EEF2,EIF2D,EIF1AX,EIF2B1,EIF2S3,EIF2A
GO:0001882	nucleoside binding	2.45e-12	4.949e-09	1.237e-09	1.013e-08	209	1838	GPHN,MKKS,PI4K2B,UBA5,ABCF1,MARS,ACLY,DNAJA2,RPS6KB1,LRRK2,OBSCN,ACTG1,MCM2,MCM3,MCM6,MCM7,ACTN4,WARS2,ADCY7,RAB8A,PIK3R4,FARSA,ACSM3,ATP8A1,ARL13B,POLR1B,MERTK,POMK,TIMM44,UBE2J1,TRIB2,RTCB,HSPA4L,SGK1,NOA1,RHOBTB3,LARS,ICK,CCT7,CCT4,CHD8,CCT2,CHD7,TARS2,DDX55,FANCM,MAPKAPK5,DDX27,PAICS,YARS,IARS2,POLR3B,GTPBP8,RUVBL1,CCT5,TSR1,MTHFD1,MTIF2,TBK1,ASNS,HLTF,CCT8,DHX32,COASY,ATP1B1,RAB21,ATP2A2,ATP…
GO:0032549	ribonucleoside binding	3.073e-12	6.207e-09	1.241e-09	1.016e-08	208	1831	GPHN,MKKS,PI4K2B,UBA5,ABCF1,MARS,ACLY,DNAJA2,RPS6KB1,LRRK2,OBSCN,ACTG1,MCM2,MCM3,MCM6,MCM7,WARS2,ADCY7,RAB8A,PIK3R4,FARSA,ACSM3,ATP8A1,ARL13B,POLR1B,MERTK,POMK,TIMM44,UBE2J1,TRIB2,RTCB,HSPA4L,SGK1,NOA1,RHOBTB3,LARS,ICK,CCT7,CCT4,CHD8,CCT2,CHD7,TARS2,DDX55,FANCM,MAPKAPK5,DDX27,PAICS,YARS,IARS2,POLR3B,GTPBP8,RUVBL1,CCT5,TSR1,MTHFD1,MTIF2,TBK1,ASNS,HLTF,CCT8,DHX32,COASY,ATP1B1,RAB21,ATP2A2,ATP5F1A,N…
GO:0035639	purine ribonucleoside triphosphate binding	4.349e-12	8.785e-09	1.464e-09	1.199e-08	206	1815	GPHN,MKKS,PI4K2B,UBA5,ABCF1,MARS,ACLY,DNAJA2,RPS6KB1,LRRK2,OBSCN,ACTG1,MCM2,MCM3,MCM6,MCM7,WARS2,ADCY7,RAB8A,PIK3R4,FARSA,ACSM3,ATP8A1,ARL13B,MERTK,POMK,TIMM44,UBE2J1,TRIB2,RTCB,HSPA4L,SGK1,NOA1,RHOBTB3,LARS,ICK,CCT7,CCT4,CHD8,CCT2,CHD7,TARS2,DDX55,FANCM,MAPKAPK5,DDX27,PAICS,YARS,IARS2,GTPBP8,RUVBL1,CCT5,TSR1,MTHFD1,MTIF2,TBK1,ASNS,HLTF,CCT8,DHX32,COASY,ATP1B1,RAB21,ATP2A2,ATP5F1A,NLK,DHX36,CMPK1…
GO:0032550	purine ribonucleoside binding	8.507e-12	1.718e-08	2.455e-09	2.01e-08	206	1828	GPHN,MKKS,PI4K2B,UBA5,ABCF1,MARS,ACLY,DNAJA2,RPS6KB1,LRRK2,OBSCN,ACTG1,MCM2,MCM3,MCM6,MCM7,WARS2,ADCY7,RAB8A,PIK3R4,FARSA,ACSM3,ATP8A1,ARL13B,MERTK,POMK,TIMM44,UBE2J1,TRIB2,RTCB,HSPA4L,SGK1,NOA1,RHOBTB3,LARS,ICK,CCT7,CCT4,CHD8,CCT2,CHD7,TARS2,DDX55,FANCM,MAPKAPK5,DDX27,PAICS,YARS,IARS2,GTPBP8,RUVBL1,CCT5,TSR1,MTHFD1,MTIF2,TBK1,ASNS,HLTF,CCT8,DHX32,COASY,ATP1B1,RAB21,ATP2A2,ATP5F1A,NLK,DHX36,CMPK1…
GO:0001883	purine nucleoside binding	9.915e-12	2.003e-08	2.503e-09	2.05e-08	206	1831	GPHN,MKKS,PI4K2B,UBA5,ABCF1,MARS,ACLY,DNAJA2,RPS6KB1,LRRK2,OBSCN,ACTG1,MCM2,MCM3,MCM6,MCM7,WARS2,ADCY7,RAB8A,PIK3R4,FARSA,ACSM3,ATP8A1,ARL13B,MERTK,POMK,TIMM44,UBE2J1,TRIB2,RTCB,HSPA4L,SGK1,NOA1,RHOBTB3,LARS,ICK,CCT7,CCT4,CHD8,CCT2,CHD7,TARS2,DDX55,FANCM,MAPKAPK5,DDX27,PAICS,YARS,IARS2,GTPBP8,RUVBL1,CCT5,TSR1,MTHFD1,MTIF2,TBK1,ASNS,HLTF,CCT8,DHX32,COASY,ATP1B1,RAB21,ATP2A2,ATP5F1A,NLK,DHX36,CMPK1…
GO:0032555	purine ribonucleotide binding	1.657e-11	3.347e-08	3.719e-09	3.045e-08	208	1864	GPHN,MKKS,PI4K2B,UBA5,ABCF1,MARS,ACLY,DNAJA2,RPS6KB1,LRRK2,OBSCN,ACTG1,MCM2,MCM3,MCM6,MCM7,WARS2,ADCY7,RAB8A,PIK3R4,FARSA,ACSM3,ATP8A1,ARL13B,MERTK,POMK,TIMM44,UBE2J1,TRIB2,RTCB,HSPA4L,SGK1,NOA1,RHOBTB3,LARS,ICK,CCT7,CCT4,CHD8,CCT2,CHD7,TARS2,DDX55,FANCM,MAPKAPK5,DDX27,PAICS,YARS,IARS2,GTPBP8,RUVBL1,CCT5,TSR1,MTHFD1,MTIF2,TBK1,ASNS,HLTF,CCT8,DHX32,COASY,ATP1B1,RAB21,ATP2A2,ATP5F1A,NLK,DHX36,CMPK1…
GO:0032553	ribonucleotide binding	3.647e-11	7.367e-08	7.367e-09	6.032e-08	208	1880	GPHN,MKKS,PI4K2B,UBA5,ABCF1,MARS,ACLY,DNAJA2,RPS6KB1,LRRK2,OBSCN,ACTG1,MCM2,MCM3,MCM6,MCM7,WARS2,ADCY7,RAB8A,PIK3R4,FARSA,ACSM3,ATP8A1,ARL13B,MERTK,POMK,TIMM44,UBE2J1,TRIB2,RTCB,HSPA4L,SGK1,NOA1,RHOBTB3,LARS,ICK,CCT7,CCT4,CHD8,CCT2,CHD7,TARS2,DDX55,FANCM,MAPKAPK5,DDX27,PAICS,YARS,IARS2,GTPBP8,RUVBL1,CCT5,TSR1,MTHFD1,MTIF2,TBK1,ASNS,HLTF,CCT8,DHX32,COASY,ATP1B1,RAB21,ATP2A2,ATP5F1A,NLK,DHX36,CMPK1…
GO:0030554	adenyl nucleotide binding	7.075e-11	1.429e-07	1.299e-08	1.064e-07	176	1530	GPHN,MKKS,PI4K2B,UBA5,ABCF1,MARS,ACLY,DNAJA2,RPS6KB1,LRRK2,OBSCN,ACTG1,MCM2,MCM3,MCM6,MCM7,WARS2,ADCY7,PIK3R4,FARSA,ACSM3,ATP8A1,AHCY,MERTK,POMK,TIMM44,UBE2J1,TRIB2,RTCB,HSPA4L,SGK1,RHOBTB3,LARS,ICK,CCT7,CCT4,CHD8,CCT2,CHD7,TARS2,DDX55,FANCM,MAPKAPK5,DDX27,PAICS,YARS,GRPEL1,IARS2,RUVBL1,CCT5,MTHFD1,TBK1,ASNS,HLTF,CCT8,DHX32,COASY,ATP1B1,ATP2A2,ATP5F1A,NLK,DHX36,CMPK1,MYH10,ATR,VWA8,STK26,NAIP,NAR…
GO:0003743	translation initiation factor activity	9.348e-11	1.888e-07	1.574e-08	1.288e-07	20	51	EIF3L,EIF3M,EIF1AD,MTIF2,EIF3A,EIF3B,EIF3C,EIF3D,EIF3G,EIF3I,EIF2B3,EIF2B5,EIF2S2,EIF4H,EIF3E,EIF2D,EIF1AX,EIF2B1,EIF2S3,EIF2A
GO:0043021	ribonucleoprotein complex binding	2.03e-10	4.1e-07	3.154e-08	2.583e-07	31	120	ABCF1,RPN2,ETF1,IMPACT,PRMT5,NAA15,PHF6,ERI1,MTIF2,TIMM50,WDR12,EIF3C,SNRPD1,SRP68,SRP72,C1QBP,GCN1,OXA1L,PES1,GUF1,EIF4H,MRPL58,PRPF31,DDX3X,ERAL1,ITCH,RBM3,NMD3,EEF2,EIF1AX,EIF2A
GO:0005524	ATP binding	4.394e-10	8.876e-07	6.34e-08	5.191e-07	168	1475	GPHN,MKKS,PI4K2B,UBA5,ABCF1,MARS,ACLY,DNAJA2,RPS6KB1,LRRK2,OBSCN,ACTG1,MCM2,MCM3,MCM6,MCM7,WARS2,ADCY7,PIK3R4,FARSA,ACSM3,ATP8A1,MERTK,POMK,TIMM44,UBE2J1,TRIB2,RTCB,HSPA4L,SGK1,RHOBTB3,LARS,ICK,CCT7,CCT4,CHD8,CCT2,CHD7,TARS2,DDX55,FANCM,MAPKAPK5,DDX27,PAICS,YARS,IARS2,RUVBL1,CCT5,MTHFD1,TBK1,ASNS,HLTF,CCT8,DHX32,COASY,ATP1B1,ATP2A2,ATP5F1A,NLK,DHX36,CMPK1,MYH10,ATR,VWA8,STK26,NAIP,NARS,SRPK1,SRPK…
GO:0032559	adenyl ribonucleotide binding	7.016e-10	1.417e-06	9.449e-08	7.737e-07	171	1518	GPHN,MKKS,PI4K2B,UBA5,ABCF1,MARS,ACLY,DNAJA2,RPS6KB1,LRRK2,OBSCN,ACTG1,MCM2,MCM3,MCM6,MCM7,WARS2,ADCY7,PIK3R4,FARSA,ACSM3,ATP8A1,MERTK,POMK,TIMM44,UBE2J1,TRIB2,RTCB,HSPA4L,SGK1,RHOBTB3,LARS,ICK,CCT7,CCT4,CHD8,CCT2,CHD7,TARS2,DDX55,FANCM,MAPKAPK5,DDX27,PAICS,YARS,IARS2,RUVBL1,CCT5,MTHFD1,TBK1,ASNS,HLTF,CCT8,DHX32,COASY,ATP1B1,ATP2A2,ATP5F1A,NLK,DHX36,CMPK1,MYH10,ATR,VWA8,STK26,NAIP,NARS,SRPK1,SRPK…
GO:0004386	helicase activity	1.075e-09	2.171e-06	1.357e-07	1.111e-06	37	172	MCM2,MCM3,MCM6,MCM7,RHOBTB3,CHD8,CHD7,DDX55,FANCM,DDX27,RUVBL1,HLTF,GINS2,DHX32,DHX36,NBN,RAD54L2,RUVBL2,SUPV3L1,DDX18,DICER1,DDX21,DDX19B,DDX58,CHD1,CHD4,ERCC8,EIF4H,XRCC5,SMARCAD1,DDX3X,DHX8,DDX10,ENTPD7,UPF1,G3BP1,DDX39A
GO:0051082	unfolded protein binding	2.088e-09	4.217e-06	2.481e-07	2.031e-06	27	103	MKKS,CHAF1B,DNAJA2,CCT7,CCT4,CCT2,GRPEL1,CCT5,CCT8,DNAJB11,CLPX,RUVBL2,AFG3L2,TBCE,TCP1,CANX,CDC37,HSP90B1,CCT3,PFDN1,PFDN2,HSP90AB1,HSP90AB3P,PPIB,TRAP1,LMAN1,NDUFAF1
GO:0016462	pyrophosphatase activity	4.322e-09	8.73e-06	4.85e-07	3.971e-06	105	827	ABCF1,LRRK2,MCM2,MCM3,MCM6,MCM7,RAB8A,ATP8A1,APPBP2,IPO8,DCPS,NOA1,ANXA5,RHOBTB3,CHD8,CHD7,DDX55,FANCM,DDX27,ARHGDIB,ATP6V1H,RUVBL1,TSR1,MTIF2,HLTF,CCT8,GINS2,DHX32,ATP1B1,RAB21,ATP2A2,ATP5F1A,ATP5PB,DHX36,ATP5PF,MYH10,VWA8,NBN,RAD54L2,CLPX,RUVBL2,TUBB6,PHOSPHO1,SUPV3L1,DDX18,AFG3L2,ATP11A,RAB31,NRAS,KATNA1,DICER1,OPA1,MSH6,GTF2H1,DDX21,ATP6V0A2,DDX19B,GTPBP4,DDX58,GPN1,CHD1,CHD4,TUFM,EFTUD2,TUBB…
GO:0016818	hydrolase activity, acting on acid anhydrides, in phosphorus-containing anhydrides	4.928e-09	9.955e-06	5.239e-07	4.29e-06	105	829	ABCF1,LRRK2,MCM2,MCM3,MCM6,MCM7,RAB8A,ATP8A1,APPBP2,IPO8,DCPS,NOA1,ANXA5,RHOBTB3,CHD8,CHD7,DDX55,FANCM,DDX27,ARHGDIB,ATP6V1H,RUVBL1,TSR1,MTIF2,HLTF,CCT8,GINS2,DHX32,ATP1B1,RAB21,ATP2A2,ATP5F1A,ATP5PB,DHX36,ATP5PF,MYH10,VWA8,NBN,RAD54L2,CLPX,RUVBL2,TUBB6,PHOSPHO1,SUPV3L1,DDX18,AFG3L2,ATP11A,RAB31,NRAS,KATNA1,DICER1,OPA1,MSH6,GTF2H1,DDX21,ATP6V0A2,DDX19B,GTPBP4,DDX58,GPN1,CHD1,CHD4,TUFM,EFTUD2,TUBB…
GO:0016817	hydrolase activity, acting on acid anhydrides	5.261e-09	1.063e-05	5.314e-07	4.351e-06	105	830	ABCF1,LRRK2,MCM2,MCM3,MCM6,MCM7,RAB8A,ATP8A1,APPBP2,IPO8,DCPS,NOA1,ANXA5,RHOBTB3,CHD8,CHD7,DDX55,FANCM,DDX27,ARHGDIB,ATP6V1H,RUVBL1,TSR1,MTIF2,HLTF,CCT8,GINS2,DHX32,ATP1B1,RAB21,ATP2A2,ATP5F1A,ATP5PB,DHX36,ATP5PF,MYH10,VWA8,NBN,RAD54L2,CLPX,RUVBL2,TUBB6,PHOSPHO1,SUPV3L1,DDX18,AFG3L2,ATP11A,RAB31,NRAS,KATNA1,DICER1,OPA1,MSH6,GTF2H1,DDX21,ATP6V0A2,DDX19B,GTPBP4,DDX58,GPN1,CHD1,CHD4,TUFM,EFTUD2,TUBB…
GO:0017111	nucleoside-triphosphatase activity	8.653e-09	1.748e-05	8.324e-07	6.816e-06	100	785	ABCF1,LRRK2,MCM2,MCM3,MCM6,MCM7,RAB8A,ATP8A1,APPBP2,IPO8,NOA1,ANXA5,RHOBTB3,CHD8,CHD7,DDX55,FANCM,DDX27,ARHGDIB,ATP6V1H,RUVBL1,TSR1,MTIF2,HLTF,CCT8,GINS2,DHX32,ATP1B1,RAB21,ATP2A2,ATP5F1A,ATP5PB,DHX36,ATP5PF,MYH10,VWA8,NBN,RAD54L2,CLPX,RUVBL2,TUBB6,SUPV3L1,DDX18,AFG3L2,ATP11A,RAB31,NRAS,KATNA1,DICER1,OPA1,MSH6,GTF2H1,DDX21,ATP6V0A2,DDX19B,GTPBP4,DDX58,GPN1,CHD1,CHD4,TUFM,EFTUD2,TUBB1,ERCC8,GUF1,R…
GO:0016874	ligase activity	5.394e-08	0.000109	4.953e-06	4.056e-05	61	415	UBA5,MARS,MARCH2,WARS2,BRAP,LRRC47,FARSA,ACSM3,MIB1,RTCB,LARS,TARS2,PAICS,YARS,IARS2,MTHFD1,MARCH3,ASNS,HLTF,CCNB1IP1,NARS,SUCLG2,SUCLG1,SUCLA2,MOCS3,PRPF19,HERC2,BTRC,MARS2,RGPD2,LIAS,GATC,CBL,CBLB,PIAS2,MRPL39,MKRN2,GATB,PFAS,TRIP12,UBA1,CTPS2,UBE3A,VARS,ASNSD1,RCHY1,MTHFD1L,IFNAR1,TTLL4,DZIP3,CTPS1,DARS,KARS,ITCH,RBBP6,UBA2,UBR7,DARS2,RNF6,UBE3D,QRSL1
GO:0030515	snoRNA binding	1.729e-07	0.0003493	1.516e-05	0.0001242	12	28	NUFIP1,NOP56,NOP58,NOP14,DIEXF,TSR1,UTP6,WDR3,DDX21,BMS1,DKC1,HEATR1
GO:0004812	aminoacyl-tRNA ligase activity	1.877e-07	0.0003791	1.516e-05	0.0001242	15	44	MARS,WARS2,LRRC47,FARSA,LARS,TARS2,YARS,IARS2,NARS,MARS2,MRPL39,VARS,DARS,KARS,DARS2
GO:0016875	ligase activity, forming carbon-oxygen bonds	1.877e-07	0.0003791	1.516e-05	0.0001242	15	44	MARS,WARS2,LRRC47,FARSA,LARS,TARS2,YARS,IARS2,NARS,MARS2,MRPL39,VARS,DARS,KARS,DARS2
GO:0003678	DNA helicase activity	4.075e-07	0.0008232	3.166e-05	0.0002593	18	65	MCM2,MCM3,MCM6,MCM7,RHOBTB3,CHD8,RUVBL1,GINS2,NBN,RUVBL2,SUPV3L1,CHD1,CHD4,ERCC8,XRCC5,DDX3X,ENTPD7,G3BP1
GO:0001094	TFIID-class transcription factor binding	8.611e-07	0.001739	6.442e-05	0.0005275	6	7	ERCC4,FBL,NOP58,RUVBL1,RUVBL2,ZNHIT6
GO:0008026	ATP-dependent helicase activity	9.56e-07	0.001931	6.492e-05	0.0005316	24	112	MCM6,MCM7,RHOBTB3,DDX55,DDX27,RUVBL1,DHX32,DHX36,NBN,RUVBL2,SUPV3L1,DDX18,DDX21,DDX19B,CHD1,CHD4,XRCC5,DDX3X,DHX8,DDX10,ENTPD7,UPF1,G3BP1,DDX39A
GO:0070035	purine NTP-dependent helicase activity	9.56e-07	0.001931	6.492e-05	0.0005316	24	112	MCM6,MCM7,RHOBTB3,DDX55,DDX27,RUVBL1,DHX32,DHX36,NBN,RUVBL2,SUPV3L1,DDX18,DDX21,DDX19B,CHD1,CHD4,XRCC5,DDX3X,DHX8,DDX10,ENTPD7,UPF1,G3BP1,DDX39A
GO:0042623	ATPase activity, coupled	9.642e-07	0.001948	6.492e-05	0.0005316	49	332	MCM6,MCM7,ATP8A1,IPO8,ANXA5,RHOBTB3,CHD8,DDX55,DDX27,ATP6V1H,RUVBL1,CCT8,DHX32,ATP1B1,ATP2A2,ATP5F1A,ATP5PB,DHX36,MYH10,NBN,CLPX,RUVBL2,SUPV3L1,DDX18,AFG3L2,ATP11A,KATNA1,GTF2H1,DDX21,ATP6V0A2,DDX19B,CHD1,CHD4,ERCC8,ABCG2,XRCC5,PSMC4,PSMC5,DDX3X,DHX8,DDX10,CHTF8,ATP11C,ENTPD7,UPF1,RFC2,ATP8B2,G3BP1,DDX39A
GO:0003735	structural constituent of ribosome	1.554e-06	0.00314	9.944e-05	0.0008143	36	216	RPL29,RPS8,RPS23,RPS25,RPS27A,MRPL35,SLC25A5,SLC25A6,SLC25A33,MRPL13,MRPL15,COA1,MRPS23,MRPL39,MRPL3,MRPS35,SLC25A32,MRPS21,MRPS15,MRPS9,MRPS5,MRPL32,MRPL11,MRPL9,MRPL16,MRPL20,MRPL47,MRPS16,MRPL2,MRPS7,SLC25A36,MRTO4,MRPL46,RSL24D1,RPL9,RPL12
GO:0001099	basal RNA polymerase II transcription machinery binding	1.625e-06	0.003282	9.944e-05	0.0008143	11	28	ZNF326,ERCC4,FBL,NOP58,RUVBL1,RUVBL2,ZNHIT6,CTR9,SMYD2,ELP3,ELP2
GO:0001098	basal transcription machinery binding	1.625e-06	0.003282	9.944e-05	0.0008143	11	28	ZNF326,ERCC4,FBL,NOP58,RUVBL1,RUVBL2,ZNHIT6,CTR9,SMYD2,ELP3,ELP2
GO:0019843	rRNA binding	3.219e-06	0.006502	0.0001865	0.001527	17	67	RPF2,RPF1,NSUN4,ERI1,DIEXF,NCL,DDX21,CIRBP,MRPL11,MRPL16,ERAL1,MRPL20,MRPS7,EEF2,MRTO4,RPL9,RPL12
GO:0001091	RNA polymerase II basal transcription factor binding	3.232e-06	0.006529	0.0001865	0.001527	6	8	ERCC4,FBL,NOP58,RUVBL1,RUVBL2,ZNHIT6
GO:0044877	macromolecular complex binding	5.997e-06	0.01211	0.0003365	0.002755	162	1626	CHAF1B,ZNF326,MCMBP,ABCF1,RPN2,MAX,ETF1,LRRK2,IMPACT,SKA2,ACTN4,CITED2,S100A8,S100A9,SAFB,FBN1,FCGR1A,PRMT5,AIF1,GPNMB,UXT,MMP9,MMP14,UQCRHL,MPO,CUL2,APPBP2,NAA15,SGTA,ANXA7,PHF6,APEX1,CHD8,CHD7,ERI1,FANCM,SKIL,NCOA5,GAS2L1,MAPRE3,MTIF2,PSMG1,TIMM50,CDK5RAP1,SMARCC1,NCOA1,WDR82,WDR12,EIF3C,ATP1B1,SNRPD1,GABPA,MYC,MYH10,CTNNAL1,MYL4,ATR,NCKAP1,IQGAP2,ADAM9,MEIOB,SRP68,SRP72,BCKDHB,TUBGCP2,SSRP1,TU…
GO:0016887	ATPase activity	6.445e-06	0.01302	0.0003519	0.002881	58	446	ABCF1,MCM6,MCM7,ATP8A1,IPO8,ANXA5,RHOBTB3,CHD8,DDX55,DDX27,ATP6V1H,RUVBL1,HLTF,CCT8,DHX32,ATP1B1,ATP2A2,ATP5F1A,ATP5PB,DHX36,ATP5PF,MYH10,VWA8,NBN,RAD54L2,CLPX,RUVBL2,SUPV3L1,DDX18,AFG3L2,ATP11A,KATNA1,MSH6,GTF2H1,DDX21,ATP6V0A2,DDX19B,CHD1,CHD4,ERCC8,ABCG2,ATP5MF,XRCC5,PSMC4,PSMC5,DDX3X,DHX8,DDX10,CHTF8,ATP11C,ENTPD7,ABCF2,UPF1,RFC2,ATP8B2,G3BP1,ABCE1,DDX39A
GO:0003729	mRNA binding	1.004e-05	0.02029	0.0005339	0.004372	30	179	XPO5,FECH,SYNCRIP,MRPL13,THOC5,IGF2BP1,IGF2BP3,SNRPC,PABPC4,NCL,SSB,RNPS1,C1QBP,CLUH,LARP1,GRSF1,PARK7,TSN,CIRBP,TYMS,PUM1,SERBP1,IREB2,PTBP1,DDX3X,SLBP,PUM3,MRPS7,G3BP1,HNRNPR
GO:0043022	ribosome binding	1.8e-05	0.03635	0.0009322	0.007633	14	54	ABCF1,RPN2,ETF1,IMPACT,NAA15,ERI1,EIF3C,C1QBP,GCN1,OXA1L,GUF1,MRPL58,EEF2,EIF2A
GO:0008168	methyltransferase activity	2.022e-05	0.04085	0.001021	0.008363	33	213	FBL,MRM1,PRMT5,LCMT1,NSUN4,TYW3,TRMT1,METTL13,DPH5,MTR,WDR82,FTSJ3,RNMT,CMTR1,COQ3,DIMT1,DPY30,NOP2,WDR5,CARNMT1,TYMS,WDR77,METTL7A,METTL22,MRM2,FTSJ1,NSUN2,SMYD2,CIAPIN1,TRMT61B,ARMT1,PCMTD2,PRMT3
GO:0016741	transferase activity, transferring one-carbon groups	2.598e-05	0.05248	0.00128	0.01048	34	225	FBL,MRM1,PRMT5,LCMT1,NSUN4,TYW3,TRMT1,METTL13,DPH5,MTR,WDR82,ATIC,FTSJ3,RNMT,CMTR1,COQ3,DIMT1,DPY30,NOP2,WDR5,CARNMT1,TYMS,WDR77,METTL7A,METTL22,MRM2,FTSJ1,NSUN2,SMYD2,CIAPIN1,TRMT61B,ARMT1,PCMTD2,PRMT3
GO:0000049	tRNA binding	2.732e-05	0.05519	0.001314	0.01076	13	49	MARS,FARSA,XPO5,NSUN4,TRMT1,YARS,SSB,NSUN2,KARS,THG1L,DARS2,EIF2AK4,EIF2A
GO:0008757	S-adenosylmethionine-dependent methyltransferase activity	3.347e-05	0.0676	0.001572	0.01287	29	181	FBL,MRM1,PRMT5,LCMT1,NSUN4,TRMT1,METTL13,DPH5,MTR,WDR82,FTSJ3,RNMT,CMTR1,COQ3,DIMT1,DPY30,NOP2,WDR5,CARNMT1,WDR77,METTL7A,METTL22,MRM2,NSUN2,SMYD2,TRMT61B,ARMT1,PCMTD2,PRMT3
GO:0004540	ribonuclease activity	3.479e-05	0.07027	0.001597	0.01308	20	103	RIDA,CNOT6,ELAC1,XRN2,DCPS,NOB1,RPP30,APEX1,DIS3,CPSF3,RPP14,DICER1,PDE12,EXOSC8,ELAC2,PNPT1,EXOSC9,TSEN15,EXOSC3,ISG20L2
GO:0003727	single-stranded RNA binding	4.731e-05	0.09556	0.002124	0.01739	17	81	TLR8,SYNCRIP,SNRPC,PABPC4,THRA,DDX58,U2AF2,HNRNPF,PNPT1,EIF4H,POLR2D,CNBP,LSM14A,PAIP2B,PTBP1,DDX3X,HNRNPDL
GO:0019899	enzyme binding	5.695e-05	0.115	0.002501	0.02048	181	1929	ABAT,ZNF326,FBL,RPS6KB1,LRRK2,ACTG1,MCM2,BFAR,MCM10,HDHD2,ADD3,RAB8A,NUFIP1,SORT1,CITED2,SAFB,XPO5,TIMM44,ANAPC5,CUL4B,CUL2,CUL1,UBE2J1,TRIB2,ANKFY1,IPO8,IPO7,NOP56,DCUN1D5,SLC25A5,HACD3,SGK1,ANXA5,RHOBTB3,PHF6,CCT2,APP,AP3M1,MSN,ARHGDIB,NOP58,NOP14,RUVBL1,HLTF,CDK5RAP1,NCOA1,EIF3A,EIF3I,ATP1B1,BECN1,ATP2A2,NLK,MYC,DHX36,GGA2,NCKAP1,IQGAP2,ADAM9,CCDC50,NCF2,RAD54L2,RUVBL2,RCC2,STAT3,KSR1,NEK2,FAF…
GO:0048037	cofactor binding	7.907e-05	0.1597	0.003398	0.02783	38	277	ABAT,ACADM,ACLY,ACOX1,ME2,AHCY,SDHD,SGK1,AGPS,ASNS,SOAT1,NDUFA9,SUCLG1,NDUFAB1,DUS1L,C3,GOT1,GOT2,DUS4L,OAT,NFS1,CBS,GSR,AIFM1,TKT,KYAT3,PLPBP,SQOR,TXNRD1,TYMS,MTO1,IDH3B,HACL1,CTH,CYBB,PHGDH,LDHA,LDHB
GO:0016884	carbon-nitrogen ligase activity, with glutamine as amido-N-donor	8.304e-05	0.1677	0.003439	0.02816	6	12	ASNS,GATC,GATB,PFAS,ASNSD1,QRSL1
GO:0004003	ATP-dependent DNA helicase activity	8.341e-05	0.1685	0.003439	0.02816	12	47	MCM6,MCM7,RHOBTB3,RUVBL1,NBN,RUVBL2,CHD1,CHD4,XRCC5,DDX3X,ENTPD7,G3BP1
GO:0008094	DNA-dependent ATPase activity	8.813e-05	0.178	0.00356	0.02915	18	93	MCM6,MCM7,RHOBTB3,CHD8,RUVBL1,DHX36,NBN,RUVBL2,GTF2H1,CHD1,CHD4,ERCC8,XRCC5,DDX3X,CHTF8,ENTPD7,RFC2,G3BP1
GO:0031369	translation initiation factor binding	0.0001169	0.2361	0.00463	0.03791	10	35	EIF3M,EIF3B,EIF3C,ZPR1,EIF2B5,LARP1,POLR2D,DDX3X,EIF4EBP2,EIF2AK4
GO:0008483	transaminase activity	0.0001226	0.2477	0.004763	0.039	8	23	ABAT,BCAT1,GOT1,GOT2,OAT,TGM2,KYAT3,PSAT1
GO:0008173	RNA methyltransferase activity	0.0001276	0.2577	0.004862	0.03981	19	104	FBL,MRM1,PRMT5,NSUN4,TRMT1,METTL13,FTSJ3,RNMT,CMTR1,DIMT1,NOP2,METTL22,MRM2,FTSJ1,NSUN2,SMYD2,TRMT61B,ARMT1,PRMT3
GO:0016829	lyase activity	0.0001319	0.2665	0.004935	0.04041	29	195	UBA5,ACO2,ME2,ADCY7,FECH,FH,ALDOA,HACD3,APEX1,PAICS,CENPV,ECHDC1,BCKDHB,ALKBH1,GLO1,GOT1,HACD2,RPP14,CBS,TGDS,KYAT3,PARK7,HMGA1,UMPS,XRCC5,HACL1,CTH,DERA,ENO1
GO:0004532	exoribonuclease activity	0.0001516	0.3062	0.005567	0.04559	10	36	CNOT6,XRN2,DCPS,DIS3,PDE12,EXOSC8,PNPT1,EXOSC9,EXOSC3,ISG20L2
GO:0003924	GTPase activity	0.0001579	0.319	0.005697	0.04665	33	236	LRRK2,RAB8A,NOA1,ARHGDIB,TSR1,MTIF2,RAB21,TUBB6,RAB31,NRAS,OPA1,GTPBP4,GPN1,TUFM,EFTUD2,TUBB1,GUF1,RAB9A,GNL2,GFM1,BMS1,DDX3X,RAB7A,RAB1A,RAB27A,GNL3,KRAS,RAN,EEF2,ARL8B,EIF2S3,TUBD1,RHOT1
GO:0008186	RNA-dependent ATPase activity	0.0001917	0.3872	0.006677	0.05467	14	66	DDX55,DDX27,DHX32,DHX36,SUPV3L1,DDX18,DDX21,DDX19B,DDX3X,DHX8,DDX10,UPF1,G3BP1,DDX39A
GO:0004004	ATP-dependent RNA helicase activity	0.0001917	0.3872	0.006677	0.05467	14	66	DDX55,DDX27,DHX32,DHX36,SUPV3L1,DDX18,DDX21,DDX19B,DDX3X,DHX8,DDX10,UPF1,G3BP1,DDX39A
GO:0019003	GDP binding	0.0002158	0.4359	0.007389	0.0605	13	59	RAB8A,RAB21,SUCLG2,SUCLG1,RAB31,RAB9A,MIEF1,RAB7A,RAB27A,KRAS,RAN,ARL8B,EIF2B1
GO:0016769	transferase activity, transferring nitrogenous groups	0.0002378	0.4804	0.008007	0.06557	8	25	ABAT,BCAT1,GOT1,GOT2,OAT,TGM2,KYAT3,PSAT1
GO:0008171	O-methyltransferase activity	0.0002817	0.569	0.009328	0.07638	17	93	FBL,MRM1,PRMT5,LCMT1,NSUN4,METTL13,FTSJ3,CMTR1,COQ3,DIMT1,NOP2,METTL22,MRM2,SMYD2,ARMT1,PCMTD2,PRMT3
GO:0008175	tRNA methyltransferase activity	0.0003214	0.6492	0.01047	0.08574	17	94	FBL,MRM1,PRMT5,NSUN4,TRMT1,METTL13,FTSJ3,DIMT1,NOP2,METTL22,MRM2,FTSJ1,NSUN2,SMYD2,TRMT61B,ARMT1,PRMT3
GO:0003697	single-stranded DNA binding	0.0003808	0.7693	0.01221	0.09998	18	104	ERCC4,MCM6,MCM7,MCM10,WBP11,MEIOB,NCL,FUBP1,TERF2,PARK7,TSN,NABP2,POLR2D,CNBP,PTBP1,HNRNPDL,LRPPRC,RPA2
GO:0050567	glutaminyl-tRNA synthase (glutamine-hydrolyzing) activity	0.0003931	0.794	0.01241	0.1016	3	3	GATC,GATB,QRSL1
GO:0051536	iron-sulfur cluster binding	0.0005021	1	0.01528	0.1251	13	64	ABAT,ACO2,FECH,CDK5RAP1,NDUFS1,NFU1,LIAS,NFS1,UQCRFS1,PPAT,IREB2,CIAPIN1,ELP3
GO:0051540	metal cluster binding	0.0005021	1	0.01528	0.1251	13	64	ABAT,ACO2,FECH,CDK5RAP1,NDUFS1,NFU1,LIAS,NFS1,UQCRFS1,PPAT,IREB2,CIAPIN1,ELP3
GO:0005525	GTP binding	0.0005076	1	0.01528	0.1251	45	378	LRRK2,RAB8A,ARL13B,NOA1,RHOBTB3,GTPBP8,TSR1,MTIF2,RAB21,SUCLG2,SUCLG1,RABL3,LANCL2,TUBB6,RAB31,NRAS,OPA1,TGM2,NOLC1,GTPBP4,GPN1,TUFM,EFTUD2,TUBB1,GUF1,RAB9A,GNL2,HSP90AB1,GFM1,BMS1,ERAL1,THG1L,RAB7A,RAB1A,RAB27A,GNL3,KRAS,RAN,EEF2,ARL5B,ARL8B,EIF2B1,EIF2S3,TUBD1,RHOT1
GO:0016879	ligase activity, forming carbon-nitrogen bonds	0.0005143	1	0.01528	0.1251	37	293	MARCH2,BRAP,MIB1,PAICS,MTHFD1,MARCH3,ASNS,HLTF,CCNB1IP1,PRPF19,HERC2,RGPD2,LIAS,GATC,CBL,CBLB,PIAS2,MKRN2,GATB,PFAS,TRIP12,CTPS2,UBE3A,ASNSD1,RCHY1,MTHFD1L,IFNAR1,TTLL4,DZIP3,CTPS1,ITCH,RBBP6,UBA2,UBR7,RNF6,UBE3D,QRSL1
GO:0031625	ubiquitin protein ligase binding	0.0005444	1	0.01571	0.1286	35	273	ACTG1,CUL4B,CUL2,CUL1,UBE2J1,TRIB2,SLC25A5,CCT2,HLTF,BECN1,NLK,MYC,CCDC50,FAF2,HERC2,GPI,TCP1,PIAS2,CBS,GSK3B,TGFBR1,PA2G4,CHEK2,PIK3R1,DERL1,BAG4,XBP1,XRCC5,PRKAR2A,HM13,LRPPRC,LYN,RPA2,SMAD5,SMAD6
GO:0009055	electron transfer activity	0.0005444	1	0.01571	0.1286	19	116	ACADM,ACOX1,ME2,SDHD,NCF2,NDUFS1,GSR,AIFM1,TXNRD1,COX5A,COX6A1,COX7B,COX7C,IDH3B,CYB5A,CYBB,PHGDH,COA6,CIAPIN1
GO:0048027	mRNA 5'-UTR binding	0.0005902	1	0.01679	0.1375	5	11	SYNCRIP,IGF2BP1,IGF2BP3,LARP1,DDX3X
GO:0004527	exonuclease activity	0.000625	1	0.01753	0.1436	15	82	CNOT6,XRN2,DCPS,APEX1,ERI1,DIS3,CPSF3,MEIOB,PDE12,EXOSC8,PNPT1,EXOSC9,EXOSC3,ALKBH3,ISG20L2
GO:0001085	RNA polymerase II transcription factor binding	0.0006765	1	0.01872	0.1533	19	118	MKKS,ERCC4,FBL,CITED2,NOP58,RUVBL1,BEX1,RUVBL2,STAT3,GSK3B,HEY2,MTA2,CHD4,HSPA4,EXOSC9,XBP1,GATA5,ZNHIT6,SMAD4
GO:0044389	ubiquitin-like protein ligase binding	0.0007106	1	0.0194	0.1588	35	277	ACTG1,CUL4B,CUL2,CUL1,UBE2J1,TRIB2,SLC25A5,CCT2,HLTF,BECN1,NLK,MYC,CCDC50,FAF2,HERC2,GPI,TCP1,PIAS2,CBS,GSK3B,TGFBR1,PA2G4,CHEK2,PIK3R1,DERL1,BAG4,XBP1,XRCC5,PRKAR2A,HM13,LRPPRC,LYN,RPA2,SMAD5,SMAD6
GO:0003724	RNA helicase activity	0.0007606	1	0.02022	0.1656	14	75	DDX55,DDX27,DHX32,DHX36,SUPV3L1,DDX18,DDX21,DDX19B,DDX3X,DHX8,DDX10,UPF1,G3BP1,DDX39A
GO:0008565	protein transporter activity	0.0007608	1	0.02022	0.1656	17	101	TOMM5,XPO5,TOMM40,IPO8,IPO7,XPO4,COX18,TNPO3,KPNA6,TOMM70,KPNB1,KPNA4,TNPO1,IPO5,TIMM10,TIMM9,IPO11
GO:0008174	mRNA methyltransferase activity	0.0008122	1	0.02131	0.1745	15	84	FBL,MRM1,PRMT5,NSUN4,METTL13,FTSJ3,RNMT,CMTR1,DIMT1,NOP2,METTL22,MRM2,SMYD2,ARMT1,PRMT3
GO:0008139	nuclear localization sequence binding	0.0008239	1	0.02134	0.1747	7	23	BRAP,TNPO3,KPNA6,KPNB1,KPNA4,TNPO1,IPO5
GO:0032561	guanyl ribonucleotide binding	0.0008821	1	0.02248	0.184	46	399	LRRK2,RAB8A,ARL13B,NOA1,RHOBTB3,GTPBP8,TSR1,MTIF2,RAB21,SUCLG2,SUCLG1,RABL3,LANCL2,TUBB6,RAB31,NRAS,OPA1,TGM2,NOLC1,GTPBP4,GPN1,TUFM,EFTUD2,TUBB1,GUF1,RAB9A,GNL2,MIEF1,HSP90AB1,GFM1,BMS1,ERAL1,THG1L,RAB7A,RAB1A,RAB27A,GNL3,KRAS,RAN,EEF2,ARL5B,ARL8B,EIF2B1,EIF2S3,TUBD1,RHOT1
GO:0010340	carboxyl-O-methyltransferase activity	0.0009223	1	0.02248	0.184	15	85	FBL,MRM1,PRMT5,LCMT1,NSUN4,METTL13,FTSJ3,DIMT1,NOP2,METTL22,MRM2,SMYD2,ARMT1,PCMTD2,PRMT3
GO:0051998	protein carboxyl O-methyltransferase activity	0.0009223	1	0.02248	0.184	15	85	FBL,MRM1,PRMT5,LCMT1,NSUN4,METTL13,FTSJ3,DIMT1,NOP2,METTL22,MRM2,SMYD2,ARMT1,PCMTD2,PRMT3
GO:0019001	guanyl nucleotide binding	0.0009297	1	0.02248	0.184	46	400	LRRK2,RAB8A,ARL13B,NOA1,RHOBTB3,GTPBP8,TSR1,MTIF2,RAB21,SUCLG2,SUCLG1,RABL3,LANCL2,TUBB6,RAB31,NRAS,OPA1,TGM2,NOLC1,GTPBP4,GPN1,TUFM,EFTUD2,TUBB1,GUF1,RAB9A,GNL2,MIEF1,HSP90AB1,GFM1,BMS1,ERAL1,THG1L,RAB7A,RAB1A,RAB27A,GNL3,KRAS,RAN,EEF2,ARL5B,ARL8B,EIF2B1,EIF2S3,TUBD1,RHOT1
GO:0000175	3'-5'-exoribonuclease activity	0.0009344	1	0.02248	0.184	8	30	CNOT6,XRN2,DIS3,PDE12,PNPT1,EXOSC9,EXOSC3,ISG20L2
GO:0008408	3'-5' exonuclease activity	0.0009347	1	0.02248	0.184	11	52	CNOT6,XRN2,APEX1,ERI1,DIS3,MEIOB,PDE12,PNPT1,EXOSC9,EXOSC3,ISG20L2
GO:0004518	nuclease activity	0.0009912	1	0.02356	0.1929	30	230	RIDA,ERCC4,CNOT6,ELAC1,XRN2,DCPS,NOB1,RPP30,APEX1,ERI1,FANCM,DIS3,CPSF3,MEIOB,ALKBH1,RPP14,DICER1,PDE12,EXOSC8,TSN,HMGA1,ELAC2,PNPT1,EXOSC9,PTBP1,TSEN15,EXOSC3,G3BP1,ALKBH3,ISG20L2
GO:0008536	Ran GTPase binding	0.001151	1	0.02704	0.2214	9	38	XPO5,IPO8,IPO7,RGPD2,XPO4,KPNB1,TNPO1,IPO5,IPO11
GO:0016896	exoribonuclease activity, producing 5'-phosphomonoesters	0.001182	1	0.02743	0.2246	8	31	CNOT6,XRN2,DIS3,PDE12,PNPT1,EXOSC9,EXOSC3,ISG20L2
GO:0070883	pre-miRNA binding	0.001376	1	0.03159	0.2587	3	4	XPO5,DICER1,RAN
GO:0036002	pre-mRNA binding	0.001424	1	0.03215	0.2633	7	25	ERI1,RBM22,SNRPC,U2AF2,PTBP1,SLBP,PRPF39
GO:0051920	peroxiredoxin activity	0.001433	1	0.03215	0.2633	4	8	PRDX1,PARK7,SELENOF,PRDX5
GO:0004809	tRNA (guanine-N2-)-methyltransferase activity	0.001466	1	0.03219	0.2636	14	80	FBL,MRM1,PRMT5,NSUN4,TRMT1,METTL13,FTSJ3,DIMT1,NOP2,METTL22,MRM2,SMYD2,ARMT1,PRMT3
GO:0018423	protein C-terminal leucine carboxyl O-methyltransferase activity	0.001466	1	0.03219	0.2636	14	80	FBL,MRM1,PRMT5,LCMT1,NSUN4,METTL13,FTSJ3,DIMT1,NOP2,METTL22,MRM2,SMYD2,ARMT1,PRMT3
GO:0016429	tRNA (adenine-N1-)-methyltransferase activity	0.001658	1	0.03418	0.2799	14	81	FBL,MRM1,PRMT5,NSUN4,METTL13,FTSJ3,DIMT1,NOP2,METTL22,MRM2,SMYD2,TRMT61B,ARMT1,PRMT3
GO:0008169	C-methyltransferase activity	0.001658	1	0.03418	0.2799	14	81	FBL,MRM1,PRMT5,NSUN4,METTL13,FTSJ3,COQ3,DIMT1,NOP2,METTL22,MRM2,SMYD2,ARMT1,PRMT3
GO:0030580	quinone cofactor methyltransferase activity	0.001658	1	0.03418	0.2799	14	81	FBL,MRM1,PRMT5,NSUN4,METTL13,FTSJ3,COQ3,DIMT1,NOP2,METTL22,MRM2,SMYD2,ARMT1,PRMT3
GO:0008425	2-polyprenyl-6-methoxy-1,4-benzoquinone methyltransferase activity	0.001658	1	0.03418	0.2799	14	81	FBL,MRM1,PRMT5,NSUN4,METTL13,FTSJ3,COQ3,DIMT1,NOP2,METTL22,MRM2,SMYD2,ARMT1,PRMT3
GO:0016426	tRNA (adenine) methyltransferase activity	0.001658	1	0.03418	0.2799	14	81	FBL,MRM1,PRMT5,NSUN4,METTL13,FTSJ3,DIMT1,NOP2,METTL22,MRM2,SMYD2,TRMT61B,ARMT1,PRMT3
GO:0016428	tRNA (cytosine-5-)-methyltransferase activity	0.001658	1	0.03418	0.2799	14	81	FBL,MRM1,PRMT5,NSUN4,METTL13,FTSJ3,DIMT1,NOP2,METTL22,MRM2,NSUN2,SMYD2,ARMT1,PRMT3
GO:0016796	exonuclease activity, active with either ribo- or deoxyribonucleic acids and producing 5'-phosphomonoesters	0.001782	1	0.03612	0.2957	10	48	CNOT6,XRN2,APEX1,DIS3,MEIOB,PDE12,PNPT1,EXOSC9,EXOSC3,ISG20L2
GO:0042802	identical protein binding	0.001788	1	0.03612	0.2957	125	1359	CLPP,CCDC91,GPHN,RIDA,ABAT,MNS1,ACADM,MAX,RPS6KB1,ACPP,LRRK2,ACTG1,MCM6,ACTN4,MCM10,NUFIP1,BRAP,MGST1,AHCY,MMP9,ALDOA,SGTA,CCT7,APP,SKP2,PAICS,GRPEL1,SLC16A1,MTERF2,ASNS,SMN2,FTL,ATIC,FUS,SNRPC,STK26,SRM,BCAT1,NCL,RUVBL2,STAT3,EFR3A,STK10,SUPV3L1,DPY30,PRPF19,TIMELESS,NONO,GOT1,GOT2,GRB2,OAT,NFS1,TERF2,CBS,GSR,MSH6,THBS1,OXA1L,THRA,DPP9,CNOT9,TKT,QPRT,PRDX1,CHEK2,HEY2,KYAT3,TNPO3,HEXB,DDX58,PDK1,…
GO:0016427	tRNA (cytosine) methyltransferase activity	0.001871	1	0.03706	0.3034	14	82	FBL,MRM1,PRMT5,NSUN4,METTL13,FTSJ3,DIMT1,NOP2,METTL22,MRM2,NSUN2,SMYD2,ARMT1,PRMT3
GO:0003880	protein C-terminal carboxyl O-methyltransferase activity	0.001871	1	0.03706	0.3034	14	82	FBL,MRM1,PRMT5,LCMT1,NSUN4,METTL13,FTSJ3,DIMT1,NOP2,METTL22,MRM2,SMYD2,ARMT1,PRMT3
GO:0016423	tRNA (guanine) methyltransferase activity	0.002365	1	0.04638	0.3798	14	84	FBL,MRM1,PRMT5,NSUN4,TRMT1,METTL13,FTSJ3,DIMT1,NOP2,METTL22,MRM2,SMYD2,ARMT1,PRMT3
GO:0045182	translation regulator activity	0.002434	1	0.04727	0.3871	9	42	ABCF1,IGF2BP1,IGF2BP3,LARP1,PPP1R15B,CIRBP,PAIP2B,IREB2,EIF4EBP2

## Sheet: GO_MF_AB
ID	Name	p-value	q-value Bonferroni	q-value FDR B&H	q-value FDR B&Y	Hit Count in Query List	Hit Count in Genome	Hit in Query List
GO:0019863	IgE binding	3.746e-06	0.002772	0.002772	0.01992	3	5	FCER1A,MS4A2,LGALS3
GO:0019865	immunoglobulin binding	2.561e-05	0.01895	0.009475	0.06808	4	24	FCER1A,MS4A2,LGALS3,JCHAIN
GO:0047718	indanol dehydrogenase activity	0.0001574	0.1165	0.01993	0.1432	2	3	AKR1C1,AKR1C3
GO:0047086	ketosteroid monooxygenase activity	0.0001574	0.1165	0.01993	0.1432	2	3	AKR1C1,AKR1C3
GO:0019767	IgE receptor activity	0.0001574	0.1165	0.01993	0.1432	2	3	FCER1A,MS4A2
GO:0005372	water transmembrane transporter activity	0.0001616	0.1196	0.01993	0.1432	3	15	AQP1,AQP3,SLC14A1
GO:0047115	trans-1,2-dihydrobenzene-1,2-diol dehydrogenase activity	0.0003133	0.2319	0.02319	0.1666	2	4	AKR1C1,AKR1C3
GO:0047023	androsterone dehydrogenase activity	0.0003133	0.2319	0.02319	0.1666	2	4	AKR1C1,AKR1C3
GO:0005497	androgen binding	0.0003133	0.2319	0.02319	0.1666	2	4	TSPO,ALDH1A1
GO:0047006	17-alpha,20-alpha-dihydroxypregn-4-en-3-one dehydrogenase activity	0.0003133	0.2319	0.02319	0.1666	2	4	AKR1C1,AKR1C3

## Sheet: GO_CC_FL
ID	Name	p-value	q-value Bonferroni	q-value FDR B&H	q-value FDR B&Y	Hit Count in Query List	Hit Count in Genome	Hit in Query List
GO:0030529	intracellular ribonucleoprotein complex	9.892e-50	9.417e-47	4.709e-47	3.501e-46	177	745	RPL29,ZNF326,SF3B4,ABCF1,FBL,SMNDC1,BCAS2,RPS8,LRRK2,MRPL30,IMPACT,ACTN4,RPS23,RPS25,RPS27A,ADAR,MRPL35,NUFIP1,NSA2,NAF1,EIF3L,NUFIP2,EIF3M,SYNCRIP,RPF1,NSUN4,MRPS28,NOP56,NOB1,RPP30,MRPL13,APEX1,ZCCHC17,MRPL45,ERI1,API5,RRP1,RBM22,IGF2BP1,NOP58,SNRNP48,NOP14,RUVBL1,MRPL15,DIEXF,TSR1,RBMX2,PPIL1,COA1,MRPS23,PDCD11,WDR12,SMN2,DHX32,EIF3A,EIF3B,EIF3C,EIF3D,FUS,USP39,EIF3G,EIF3I,SNRPA,SNRPC,SNRPD1,C…
GO:1990904	ribonucleoprotein complex	9.892e-50	9.417e-47	4.709e-47	3.501e-46	177	745	RPL29,ZNF326,SF3B4,ABCF1,FBL,SMNDC1,BCAS2,RPS8,LRRK2,MRPL30,IMPACT,ACTN4,RPS23,RPS25,RPS27A,ADAR,MRPL35,NUFIP1,NSA2,NAF1,EIF3L,NUFIP2,EIF3M,SYNCRIP,RPF1,NSUN4,MRPS28,NOP56,NOB1,RPP30,MRPL13,APEX1,ZCCHC17,MRPL45,ERI1,API5,RRP1,RBM22,IGF2BP1,NOP58,SNRNP48,NOP14,RUVBL1,MRPL15,DIEXF,TSR1,RBMX2,PPIL1,COA1,MRPS23,PDCD11,WDR12,SMN2,DHX32,EIF3A,EIF3B,EIF3C,EIF3D,FUS,USP39,EIF3G,EIF3I,SNRPA,SNRPC,SNRPD1,C…
GO:0005730	nucleolus	5.702e-43	5.428e-40	1.809e-40	1.345e-39	185	891	FBL,MARS,BCAS2,ACOX1,SNAPC5,NOL10,RPS23,RPS25,RPS27A,MCM10,ADAR,RAB8A,NUFIP1,UTP15,NSA2,EIF3L,RPF2,POLR1B,NOL7,CUL2,RPF1,XRN2,NOP56,NOP16,LIN28B,USP28,NOB1,RPP30,PHF6,APEX1,ZCCHC17,CHD7,ERI1,AGPS,LYAR,SKP2,PCGF5,DDX27,DIS3,RRP1,NIFK,NOP58,NOP14,DIEXF,CCT5,TSR1,HLTF,PDCD11,WDR12,SMN2,EIF3A,SNRPA,FTSJ3,MYC,UTP6,WBP11,RNMT,RRP1B,HNRNPM,MAK16,SRP19,SRP68,SRP72,NBN,SRPK2,NCF2,NCL,SSRP1,PGRMC1,RCC2,NKR…
GO:0005739	mitochondrion	3.517e-39	3.348e-36	8.37e-37	6.224e-36	275	1769	CLPP,CCDC58,RIDA,SPNS1,ABAT,AGPAT5,ACADM,MARS,ACLY,ACO2,ACOX1,MRM1,RPS6KB1,APOOL,LRRK2,MRPL30,LRRC59,MDH2,TIMMDC1,TOMM5,ME2,WARS2,MRPL35,ACSM3,MGST1,FECH,MIPEP,PARL,LYPLA1,SFXN2,SCO1,NOL7,TOMM40,LRRC75A-AS1,ALDH1B1,FH,ALDOA,TIMM44,UQCRHL,SDHD,MPO,MPV17,TMEM126A,NSUN4,PTPMT1,MRPS28,DCPS,SLC25A5,SLC25A6,TCHP,HACD3,FAM210A,SGK1,NOA1,SLC25A33,TRMT1,MRPL13,APEX1,PYURF,CCT7,MRPL45,AGPS,TARS2,GRPEL1,IAR…
GO:0044429	mitochondrial part	5.247e-36	4.995e-33	9.991e-34	7.429e-33	184	987	CLPP,SPNS1,ABAT,AGPAT5,ACADM,ACO2,RPS6KB1,APOOL,LRRK2,MRPL30,LRRC59,MDH2,TIMMDC1,TOMM5,ME2,WARS2,MRPL35,ACSM3,MGST1,FECH,MIPEP,PARL,SFXN2,SCO1,TOMM40,ALDH1B1,FH,TIMM44,UQCRHL,SDHD,MPV17,TMEM126A,NSUN4,PTPMT1,MRPS28,SLC25A5,SLC25A6,NOA1,SLC25A33,MRPL13,MRPL45,TARS2,GRPEL1,IARS2,THEM4,MRPL15,TIMM21,MTERF2,TIMM50,COA1,MRPS23,COASY,BECN1,ATP5F1A,LYRM7,ATP5PB,ATP5MC1,ATP5PF,TMEM126B,MRPS27,BCKDHB,NDUF…
GO:0005759	mitochondrial matrix	2.173e-32	2.069e-29	3.448e-30	2.564e-29	107	425	CLPP,ABAT,ACADM,ACO2,LRRK2,MRPL30,LRRC59,MDH2,ME2,WARS2,MRPL35,ACSM3,FECH,MIPEP,ALDH1B1,FH,TIMM44,NSUN4,MRPS28,SLC25A5,MRPL13,TARS2,GRPEL1,IARS2,THEM4,MRPL15,MTERF2,MRPS23,COASY,ATP5F1A,LYRM7,ATP5PB,BCKDHB,CLPX,COQ3,NDUFA9,SUCLG2,SUCLG1,NDUFAB1,SUCLA2,NDUFS1,DIMT1,PMPCA,SUPV3L1,GLS,C1QBP,GOT2,MARS2,LIAS,OAT,NFS1,TFAM,GRSF1,GSR,MRPL39,PDE12,PRDX1,MRPL3,PDHA1,PDK1,PDK3,ACOT9,PARK7,MRPS35,ELAC2,TUFM…
GO:0031967	organelle envelope	1.365e-28	1.299e-25	1.856e-26	1.38e-25	189	1169	SEH1L,SPNS1,ABCF1,ZMPSTE24,AGPAT5,MNS1,ACADM,SIGMAR1,RPS6KB1,APOOL,LRRK2,MRPL30,LRRC59,MDH2,TIMMDC1,TOMM5,MRPL35,BRAP,SORT1,PIK3R4,MGST1,INTS2,FECH,PARL,SFXN2,SCO1,TOMM40,TIMM44,UQCRHL,SDHD,MPV17,TMEM126A,PTPMT1,MRPS28,IPO8,IPO7,SLC25A5,RTCB,SLC25A6,HACD3,NOA1,SLC25A33,ANXA7,MRPL13,MRPL45,APP,THEM4,NDC1,MRPL15,TIMM21,TIMM50,COA1,MRPS23,NUP133,COASY,BECN1,TXLNG,ATP5F1A,ATP5PB,ATP5MC1,ATP5PF,DPY19L…
GO:0031975	envelope	2.366e-28	2.253e-25	2.816e-26	2.094e-25	189	1174	SEH1L,SPNS1,ABCF1,ZMPSTE24,AGPAT5,MNS1,ACADM,SIGMAR1,RPS6KB1,APOOL,LRRK2,MRPL30,LRRC59,MDH2,TIMMDC1,TOMM5,MRPL35,BRAP,SORT1,PIK3R4,MGST1,INTS2,FECH,PARL,SFXN2,SCO1,TOMM40,TIMM44,UQCRHL,SDHD,MPV17,TMEM126A,PTPMT1,MRPS28,IPO8,IPO7,SLC25A5,RTCB,SLC25A6,HACD3,NOA1,SLC25A33,ANXA7,MRPL13,MRPL45,APP,THEM4,NDC1,MRPL15,TIMM21,TIMM50,COA1,MRPS23,NUP133,COASY,BECN1,TXLNG,ATP5F1A,ATP5PB,ATP5MC1,ATP5PF,DPY19L…
GO:0005743	mitochondrial inner membrane	1.176e-26	1.119e-23	1.243e-24	9.247e-24	109	507	SPNS1,APOOL,LRRK2,MRPL30,MDH2,TIMMDC1,MRPL35,MGST1,FECH,PARL,SFXN2,SCO1,TIMM44,UQCRHL,SDHD,MPV17,TMEM126A,PTPMT1,MRPS28,SLC25A5,SLC25A6,NOA1,SLC25A33,MRPL13,MRPL45,THEM4,MRPL15,TIMM21,TIMM50,COA1,MRPS23,ATP5F1A,ATP5PB,ATP5MC1,ATP5PF,TMEM126B,MRPS27,BCKDHB,NDUFA1,CLPX,COQ3,NDUFA9,SUCLG1,NDUFAB1,NDUFB5,NDUFS1,STAT3,PMPCA,AFG3L2,HERC2,GOT2,SFXN4,COX18,OPA1,MRPL39,OXA1L,AIFM1,MRPL3,C19orf70,PARK7,PHB…
GO:0019866	organelle inner membrane	2.042e-25	1.944e-22	1.944e-23	1.446e-22	114	564	SPNS1,ZMPSTE24,SIGMAR1,APOOL,LRRK2,MRPL30,MDH2,TIMMDC1,MRPL35,MGST1,FECH,PARL,SFXN2,SCO1,TIMM44,UQCRHL,SDHD,MPV17,TMEM126A,PTPMT1,MRPS28,SLC25A5,SLC25A6,NOA1,SLC25A33,MRPL13,MRPL45,THEM4,MRPL15,TIMM21,TIMM50,COA1,MRPS23,ATP5F1A,ATP5PB,ATP5MC1,ATP5PF,DPY19L3,TMEM126B,MRPS27,BCKDHB,NDUFA1,CLPX,COQ3,NDUFA9,SUCLG1,NDUFAB1,NDUFB5,NDUFS1,STAT3,PMPCA,AFG3L2,HERC2,GOT2,SFXN4,COX18,OPA1,MRPL39,OXA1L,AIFM1…
GO:0005740	mitochondrial envelope	3.612e-24	3.439e-21	3.126e-22	2.325e-21	132	736	SPNS1,AGPAT5,ACADM,RPS6KB1,APOOL,LRRK2,MRPL30,MDH2,TIMMDC1,TOMM5,MRPL35,MGST1,FECH,PARL,SFXN2,SCO1,TOMM40,TIMM44,UQCRHL,SDHD,MPV17,TMEM126A,PTPMT1,MRPS28,SLC25A5,SLC25A6,NOA1,SLC25A33,MRPL13,MRPL45,THEM4,MRPL15,TIMM21,TIMM50,COA1,MRPS23,COASY,BECN1,ATP5F1A,ATP5PB,ATP5MC1,ATP5PF,TMEM126B,MRPS27,BCKDHB,NDUFA1,CLPX,COQ3,NDUFA9,SUCLG1,NDUFAB1,NDUFB5,NDUFS1,STAT3,PMPCA,AFG3L2,HERC2,GOT2,SFXN4,COX18,OP…
GO:0031966	mitochondrial membrane	4.384e-24	4.174e-21	3.478e-22	2.586e-21	127	694	SPNS1,AGPAT5,ACADM,RPS6KB1,APOOL,LRRK2,MRPL30,MDH2,TIMMDC1,TOMM5,MRPL35,MGST1,FECH,PARL,SFXN2,SCO1,TOMM40,TIMM44,UQCRHL,SDHD,MPV17,TMEM126A,PTPMT1,MRPS28,SLC25A5,SLC25A6,NOA1,SLC25A33,MRPL13,MRPL45,THEM4,MRPL15,TIMM21,TIMM50,COA1,MRPS23,COASY,BECN1,ATP5F1A,ATP5PB,ATP5MC1,ATP5PF,TMEM126B,MRPS27,BCKDHB,NDUFA1,CLPX,COQ3,NDUFA9,SUCLG1,NDUFAB1,NDUFB5,NDUFS1,STAT3,PMPCA,AFG3L2,HERC2,GOT2,SFXN4,COX18,OP…
GO:0030684	preribosome	5.426e-19	5.166e-16	3.974e-17	2.955e-16	32	70	FBL,NSA2,RPF1,NOP56,NOB1,RRP1,NOP58,NOP14,DIEXF,TSR1,PDCD11,WDR12,FTSJ3,UTP6,RRP1B,MAK16,WDR3,RRP36,RRS1,UTP20,EBNA1BP2,PES1,WDR36,RSL1D1,NOL6,BMS1,HEATR1,FCF1,UTP18,UTP11,MRTO4,LAS1L
GO:0005840	ribosome	5.793e-17	5.515e-14	3.939e-15	2.929e-14	57	235	RPL29,ABCF1,RPS8,MRPL30,RPS23,RPS25,RPS27A,MRPL35,NUFIP1,NUFIP2,NSUN4,MRPS28,MRPL13,APEX1,ZCCHC17,MRPL45,MRPL15,COA1,MRPS23,MRPS27,SRP68,METAP1,GCN1,CANX,MRPL39,MRPL3,MRPS35,MRPS21,MRPL50,MRPL58,SF1,MRPS15,MRPS9,MRPS5,MRPL40,MRPL32,MRPL11,MRPL9,RSL1D1,DDX3X,MRPL16,MRPL20,MRPL47,RBM3,MRPL53,MRPS16,MRPL2,MRPS7,EEF2,EIF2D,MRTO4,PRMT3,EIF2AK4,MRPL46,RSL24D1,RPL9,RPL12
GO:0098798	mitochondrial protein complex	7.282e-14	6.932e-11	4.621e-12	3.437e-11	40	149	APOOL,TOMM5,TOMM40,UQCRHL,SDHD,SLC25A6,TIMM21,TIMM50,ATP5F1A,ATP5PB,ATP5MC1,ATP5PF,BCKDHB,NDUFA1,CLPX,NDUFA9,SUCLG2,SUCLG1,NDUFAB1,NDUFB5,NDUFS1,SUPV3L1,AFG3L2,C19orf70,PDK1,PARK7,PNPT1,COX5A,UQCRFS1,APOO,PMPCB,COX6A1,ATP5MF,ATP5MPL,TOMM70,DLAT,PPIF,TIMM10,TIMM9,NDUFAF1
GO:0044455	mitochondrial membrane part	2.281e-13	2.171e-10	1.357e-11	1.009e-10	45	189	APOOL,LRRK2,TOMM5,TOMM40,UQCRHL,SDHD,PTPMT1,SLC25A6,NOA1,TIMM21,TIMM50,COA1,ATP5F1A,ATP5PB,ATP5MC1,ATP5PF,NDUFA1,COQ3,NDUFA9,NDUFAB1,NDUFB5,NDUFS1,AFG3L2,COX18,OPA1,OXA1L,C19orf70,PARK7,PHB,COX5A,UQCRFS1,APOO,PMPCB,COX6A1,COX7B,ATP5MF,ATP5MPL,TOMM70,PPIF,TIMM10,TIMM9,NDUFAF1,LYN,COQ7,RHOT1
GO:0005761	mitochondrial ribosome	1.102e-11	1.049e-08	5.826e-10	4.332e-09	26	79	MRPL30,MRPL35,NSUN4,MRPS28,MRPL13,MRPL15,MRPS23,MRPL39,MRPL3,MRPS35,MRPS21,MRPL58,MRPS15,MRPS9,MRPS5,MRPL40,MRPL32,MRPL11,MRPL9,MRPL16,MRPL20,MRPL47,MRPS16,MRPL2,MRPS7,MRPL46
GO:0000313	organellar ribosome	1.102e-11	1.049e-08	5.826e-10	4.332e-09	26	79	MRPL30,MRPL35,NSUN4,MRPS28,MRPL13,MRPL15,MRPS23,MRPL39,MRPL3,MRPS35,MRPS21,MRPL58,MRPS15,MRPS9,MRPS5,MRPL40,MRPL32,MRPL11,MRPL9,MRPL16,MRPL20,MRPL47,MRPS16,MRPL2,MRPS7,MRPL46
GO:0044452	nucleolar part	1.764e-10	1.679e-07	8.837e-09	6.571e-08	23	70	FBL,UTP15,EIF3L,POLR1B,NOP56,RPP30,NOP58,WDR12,UTP6,NCL,WDR43,WDR3,TWISTNB,POLR1E,UTP4,PES1,TAF1D,POLR1A,NOL11,NOL6,DKC1,HEATR1,UTP18
GO:0098800	inner mitochondrial membrane protein complex	4.972e-10	4.733e-07	2.367e-08	1.76e-07	29	112	APOOL,UQCRHL,SDHD,SLC25A6,TIMM21,TIMM50,ATP5F1A,ATP5PB,ATP5MC1,ATP5PF,NDUFA1,NDUFA9,NDUFAB1,NDUFB5,NDUFS1,AFG3L2,C19orf70,PARK7,COX5A,UQCRFS1,APOO,PMPCB,COX6A1,ATP5MF,ATP5MPL,PPIF,TIMM10,TIMM9,NDUFAF1
GO:0005681	spliceosomal complex	8.092e-10	7.704e-07	3.668e-08	2.728e-07	37	173	ZNF326,SF3B4,SMNDC1,BCAS2,ADAR,SYNCRIP,API5,RBM22,SNRNP48,RBMX2,PPIL1,DHX32,USP39,SNRPA,SNRPC,SNRPD1,SNRPF,SNRPN,WBP11,HNRNPM,SF3A3,PRPF19,SF3B3,PRPF4,WBP4,U2AF2,HNRNPF,EFTUD2,SF1,PRPF31,DHX8,PRPF39,HNRNPDL,UPF1,RBM28,DDX39A,HNRNPR
GO:0044391	ribosomal subunit	1.136e-09	1.081e-06	4.915e-08	3.655e-07	37	175	RPL29,RPS8,RPS23,RPS25,RPS27A,NSUN4,MRPS28,MRPL13,ZCCHC17,MRPL15,COA1,MRPS23,MRPL39,MRPL3,MRPS35,MRPS21,MRPL58,MRPS15,MRPS9,MRPS5,MRPL32,MRPL11,RSL1D1,DDX3X,MRPL16,MRPL20,MRPL47,RBM3,MRPS16,MRPL2,MRPS7,EIF2D,MRTO4,MRPL46,RSL24D1,RPL9,RPL12
GO:0032040	small-subunit processome	2.382e-09	2.268e-06	9.86e-08	7.332e-07	15	34	FBL,NOP56,NOP58,NOP14,DIEXF,PDCD11,UTP6,WDR3,UTP20,WDR36,NOL6,HEATR1,FCF1,UTP18,UTP11
GO:1902494	catalytic complex	6.771e-09	6.446e-06	2.686e-07	1.997e-06	126	1077	ABAT,ERCC4,RPN2,MAX,MCM3,BRAP,LRRC47,PIK3R4,PCGF6,FARSA,NAA25,INTS2,PRMT5,POLR1B,ANAPC5,UQCRHL,SDHD,CUL4B,CUL2,CUL1,NAA15,DCUN1D5,RPP30,CHD8,SKP2,TRMT6,POLR3B,RUVBL1,POLR3E,PPP4R2,KLHL15,INTS9,WDR82,ATP1B1,BECN1,ATP2A2,SNRPD1,SNRPF,CDC23,AUP1,BACH1,KBTBD8,NCF2,BCKDHB,NDUFA1,NDUFA9,SUCLG2,SUCLG1,NDUFAB1,NDUFB5,RUVBL2,NDUFS1,TWISTNB,TAF8,DPY30,TAF5,TAF12,TAF13,BTRC,USP22,WDR5,DICER1,POLR3A,CCNF,TGF…
GO:0005852	eukaryotic translation initiation factor 3 complex	1.523e-08	1.45e-05	5.799e-07	4.312e-06	10	16	EIF3L,EIF3M,EIF3A,EIF3B,EIF3C,EIF3D,EIF3G,EIF3I,EIF3E,DDX3X
GO:0030687	preribosome, large subunit precursor	3.004e-08	2.86e-05	1.1e-06	8.179e-06	12	25	NSA2,RPF1,RRP1,WDR12,FTSJ3,RRP1B,MAK16,RRS1,EBNA1BP2,PES1,MRTO4,LAS1L
GO:0044451	nucleoplasm part	6.116e-08	5.822e-05	2.115e-06	1.573e-05	91	732	ERCC4,FBL,SMNDC1,MAX,ADAR,NUFIP1,INTS2,PRMT5,MLLT3,DUSP11,NELFCD,APEX1,CHD8,FANCM,SKIL,NOP58,POLR3B,RUVBL1,POLR3E,TIMM50,GINS2,INTS9,WDR82,SMN2,SNRPC,CPSF3,MYC,WBP11,ATR,HNRNPM,NBN,RAD54L2,RUVBL2,TAF8,PSME4,RNPS1,SUPT4H1,ZPR1,DPY30,SF3A3,PRPF19,TAF5,CPSF2,TAF12,TAF13,NONO,USP22,NOC3L,WDR5,PIAS2,POLR3A,INTS5,GTF2H1,PRPF4,WBP4,CHEK2,HEY2,CDK8,MTA2,NOLC1,ATXN2L,PARK7,MED14,U2AF2,CHD4,EFTUD2,RBM27,RC…
GO:0030688	preribosome, small subunit precursor	6.221e-08	5.922e-05	2.115e-06	1.573e-05	7	8	NOB1,RRP1,NOP14,TSR1,FTSJ3,RRP1B,UTP20
GO:0043209	myelin sheath	6.45e-08	6.14e-05	2.117e-06	1.575e-05	37	202	ACO2,ACTG1,RPS27A,MDH2,SLC25A5,CCT2,MSN,CCT5,ATP1B1,ATP5F1A,ATP5PB,SUCLA2,NDUFS1,GOT2,GPI,TCP1,CANX,PEBP1,TKT,PRDX1,CCT3,PDHA1,TUFM,PHB,COX5A,PKM,UQCRFS1,GSTO1,VDAC1,VDAC2,COX6A1,CNRIP1,PHGDH,DLAT,RTN4,LDHB,ENO1
GO:0030686	90S preribosome	8.799e-08	8.377e-05	2.792e-06	2.076e-05	12	27	NOP14,WDR12,UTP6,WDR3,RRP36,UTP20,PES1,RSL1D1,NOL6,BMS1,HEATR1,UTP18
GO:0016282	eukaryotic 43S preinitiation complex	1.37e-07	0.0001304	4.075e-06	3.03e-05	9	15	EIF3L,EIF3M,EIF3A,EIF3B,EIF3C,EIF3D,EIF3G,EIF3I,EIF3E
GO:0033290	eukaryotic 48S preinitiation complex	1.37e-07	0.0001304	4.075e-06	3.03e-05	9	15	EIF3L,EIF3M,EIF3A,EIF3B,EIF3C,EIF3D,EIF3G,EIF3I,EIF3E
GO:1990234	transferase complex	2.452e-07	0.0002334	7.073e-06	5.26e-05	88	722	ABAT,ERCC4,RPN2,MAX,MCM3,BRAP,PIK3R4,PCGF6,NAA25,INTS2,PRMT5,POLR1B,ANAPC5,CUL4B,CUL2,CUL1,NAA15,DCUN1D5,CHD8,SKP2,TRMT6,POLR3B,RUVBL1,POLR3E,KLHL15,INTS9,WDR82,BECN1,SNRPD1,SNRPF,CDC23,AUP1,BACH1,KBTBD8,RUVBL2,TWISTNB,TAF8,DPY30,TAF5,TAF12,TAF13,BTRC,USP22,WDR5,POLR3A,CCNF,TGFBR1,INTS5,GTF2H1,POLR1E,CDK4,CDK8,MED14,PGGT1B,CHUK,PHKA1,OSTC,ERCC8,ANAPC1,PIK3R1,CLNS1A,WDR77,ANAPC13,POLR1A,RCHY1,ANAP…
GO:0005832	chaperonin-containing T-complex	2.627e-07	0.00025	7.354e-06	5.469e-05	7	9	CCT7,CCT4,CCT2,CCT5,CCT8,TCP1,CCT3
GO:0070993	translation preinitiation complex	2.935e-07	0.0002794	7.983e-06	5.937e-05	9	16	EIF3L,EIF3M,EIF3A,EIF3B,EIF3C,EIF3D,EIF3G,EIF3I,EIF3E
GO:0005762	mitochondrial large ribosomal subunit	6.869e-07	0.0006539	1.767e-05	0.0001314	13	37	NSUN4,MRPL13,MRPL15,MRPL39,MRPL3,MRPL58,MRPL32,MRPL11,MRPL16,MRPL20,MRPL47,MRPL2,MRPL46
GO:0000315	organellar large ribosomal subunit	6.869e-07	0.0006539	1.767e-05	0.0001314	13	37	NSUN4,MRPL13,MRPL15,MRPL39,MRPL3,MRPL58,MRPL32,MRPL11,MRPL16,MRPL20,MRPL47,MRPL2,MRPL46
GO:0005635	nuclear envelope	1.575e-06	0.0015	3.947e-05	0.0002935	60	454	SEH1L,ABCF1,ZMPSTE24,AGPAT5,MNS1,SIGMAR1,LRRC59,BRAP,SORT1,PIK3R4,INTS2,IPO8,IPO7,RTCB,HACD3,ANXA7,APP,NDC1,MRPS23,NUP133,TXLNG,DPY19L3,DCTN5,NUP205,WDR3,RRP12,TMEM97,RGPD2,XPO4,MTMR6,TNPO3,CDK4,DDX19B,GTPBP4,KPNA6,AGFG1,TMEM109,GSTO1,ZNF383,AHCTF1,EI24,MRPS15,NUP93,CYBB,TMEM170A,KPNB1,KPNA4,TNPO1,IPO5,RAN,AKIRIN1,RTN4,CHMP4B,TMEM33,LRPPRC,LMNB1,RNF6,SENP2,MRTO4,IPO11
GO:0002199	zona pellucida receptor complex	2.123e-06	0.002021	5.182e-05	0.0003854	7	11	CCT7,CCT4,CCT2,CCT5,CCT8,TCP1,CCT3
GO:0071541	eukaryotic translation initiation factor 3 complex, eIF3m	2.93e-06	0.002789	6.973e-05	0.0005186	6	8	EIF3M,EIF3A,EIF3B,EIF3C,EIF3D,EIF3I
GO:0015934	large ribosomal subunit	3.03e-06	0.002884	7.035e-05	0.0005232	22	105	RPL29,NSUN4,MRPL13,ZCCHC17,MRPL15,COA1,MRPL39,MRPL3,MRPL58,MRPL32,MRPL11,RSL1D1,MRPL16,MRPL20,MRPL47,RBM3,MRPL2,MRTO4,MRPL46,RSL24D1,RPL9,RPL12
GO:0016604	nuclear body	3.875e-06	0.003689	8.784e-05	0.0006532	50	364	FBL,SMNDC1,MAX,ADAR,DUSP11,APEX1,SKIL,NOP58,TIMM50,SMN2,SNRPC,MYC,WBP11,ATR,HNRNPM,NBN,RAD54L2,PSME4,RNPS1,ZPR1,SF3A3,PRPF19,NONO,NOC3L,PIAS2,PRPF4,WBP4,CHEK2,NOLC1,ATXN2L,PARK7,U2AF2,EFTUD2,RBM27,RCHY1,GEMIN5,VIRMA,PPP1CC,CTR9,PRPF31,EIF3E,DDX3X,DKC1,THRAP3,FAM118B,SHQ1,GEMIN7,RNF6,SENP2,RPA2
GO:0005643	nuclear pore	4.317e-06	0.00411	9.558e-05	0.0007108	19	84	SEH1L,PIK3R4,IPO7,NDC1,NUP133,NUP205,RGPD2,XPO4,DDX19B,KPNA6,AGFG1,AHCTF1,NUP93,KPNB1,KPNA4,IPO5,RAN,TMEM33,SENP2
GO:0044445	cytosolic part	7.786e-06	0.007413	0.0001685	0.001253	36	235	RPL29,RPS8,RPS23,RPS25,RPS27A,NUFIP1,CCT7,CCT4,CCT2,ZCCHC17,HPS3,CCT5,COA1,CCT8,NAIP,METAP1,TCP1,HBE1,HBG1,HBZ,CCT3,CHUK,KXD1,MRPS5,RSL1D1,PSMC4,PSMC5,DDX3X,BLOC1S6,EIF2D,MRTO4,EIF2AK4,ENO1,RSL24D1,RPL9,RPL12
GO:0070761	pre-snoRNP complex	9.573e-06	0.009113	0.0002025	0.001506	5	6	NUFIP1,NOP56,NOP58,ZNHIT6,PIH1D1
GO:0042645	mitochondrial nucleoid	1.082e-05	0.0103	0.000224	0.001666	13	46	LRRC59,SLC25A5,MTERF2,CLPX,SUPV3L1,TFAM,GRSF1,ELAC2,TUFM,VDAC1,VDAC2,POLDIP2,LRPPRC
GO:0009295	nucleoid	1.798e-05	0.01712	0.0003643	0.002709	13	48	LRRC59,SLC25A5,MTERF2,CLPX,SUPV3L1,TFAM,GRSF1,ELAC2,TUFM,VDAC1,VDAC2,POLDIP2,LRPPRC
GO:0000502	proteasome complex	2.289e-05	0.02179	0.000454	0.003376	17	78	AUP1,PSME4,UBE3A,PSMF1,PSMA1,PSMA2,PSMA6,PSMB2,PSMB5,PSMB7,PSMC4,PSMC5,PSMD3,PSMD7,PSMD11,PSME2,PSME3
GO:0034708	methyltransferase complex	6.139e-05	0.05845	0.001193	0.00887	18	92	MAX,PRMT5,CHD8,TRMT6,RUVBL1,WDR82,SNRPD1,SNRPF,RUVBL2,DPY30,WDR5,CLNS1A,WDR77,VIRMA,PPP1CC,PRPF31,TRMT61B,LAS1L
GO:0015030	Cajal body	6.96e-05	0.06626	0.001325	0.009854	13	54	FBL,SMNDC1,NOP58,SMN2,SNRPC,ZPR1,PRPF4,NOLC1,EFTUD2,PRPF31,DKC1,FAM118B,SHQ1
GO:0044432	endoplasmic reticulum part	7.147e-05	0.06804	0.001334	0.009921	117	1177	ZMPSTE24,AGPAT5,SIGMAR1,RPN2,MARCH2,RTN3,LRRC59,BFAR,ERMP1,TLR8,SORT1,STX18,MGST1,POMK,FKBP3,SEC23B,UBE2J1,STIM2,HSD17B7,COPG1,RTCB,HACD3,SGK1,ANXA7,ZDHHC16,PYURF,ARCN1,EDEM3,ERGIC3,FAR2,UGGT2,KDSR,RAB21,BECN1,ATP2A2,SOAT1,DNAJB11,MBTPS1,AHCYL1,EMC1,ERP44,AUP1,SEC24A,TTC9C,PGRMC1,KSR1,FAF2,EBPL,VAMP7,MYDGF,ALG1,SLC37A1,CANX,HACD2,OSBP,THBS1,TKT,SLC35B4,SEC11A,HSP90B1,CTSC,MOSPD3,OSTC,UBA1,RAB9A,P…
GO:0005763	mitochondrial small ribosomal subunit	8.194e-05	0.07801	0.001472	0.01095	9	28	MRPS28,MRPS23,MRPS35,MRPS21,MRPS15,MRPS9,MRPS5,MRPS16,MRPS7
GO:0000314	organellar small ribosomal subunit	8.194e-05	0.07801	0.001472	0.01095	9	28	MRPS28,MRPS23,MRPS35,MRPS21,MRPS15,MRPS9,MRPS5,MRPS16,MRPS7
GO:0042175	nuclear outer membrane-endoplasmic reticulum membrane network	8.917e-05	0.08489	0.001572	0.01169	103	1015	ZMPSTE24,AGPAT5,SIGMAR1,RPN2,MARCH2,RTN3,LRRC59,BFAR,ERMP1,TLR8,SORT1,STX18,MGST1,POMK,FKBP3,SEC23B,UBE2J1,STIM2,HSD17B7,COPG1,RTCB,HACD3,SGK1,ANXA7,ZDHHC16,PYURF,ARCN1,ERGIC3,FAR2,KDSR,RAB21,BECN1,ATP2A2,SOAT1,MBTPS1,AHCYL1,EMC1,ERP44,AUP1,SEC24A,TTC9C,PGRMC1,KSR1,FAF2,EBPL,VAMP7,ALG1,SLC37A1,CANX,HACD2,OSBP,TKT,SLC35B4,SEC11A,HSP90B1,MOSPD3,OSTC,UBA1,RAB9A,PIK3R1,ALG8,PITPNB,PLAUR,PLD1,TMEM109,…
GO:0055029	nuclear DNA-directed RNA polymerase complex	9.816e-05	0.09345	0.001659	0.01234	21	121	ERCC4,MCM3,INTS2,POLR1B,POLR3B,POLR3E,INTS9,TWISTNB,TAF8,TAF5,TAF12,TAF13,POLR3A,INTS5,GTF2H1,POLR1E,MED14,POLR1A,POLR2D,CTR9,PSMC5
GO:0000428	DNA-directed RNA polymerase complex	9.816e-05	0.09345	0.001659	0.01234	21	121	ERCC4,MCM3,INTS2,POLR1B,POLR3B,POLR3E,INTS9,TWISTNB,TAF8,TAF5,TAF12,TAF13,POLR3A,INTS5,GTF2H1,POLR1E,MED14,POLR1A,POLR2D,CTR9,PSMC5
GO:0005789	endoplasmic reticulum membrane	9.935e-05	0.09459	0.001659	0.01234	101	994	ZMPSTE24,AGPAT5,SIGMAR1,RPN2,MARCH2,RTN3,LRRC59,BFAR,ERMP1,TLR8,SORT1,STX18,MGST1,POMK,FKBP3,SEC23B,UBE2J1,STIM2,HSD17B7,COPG1,RTCB,HACD3,SGK1,ANXA7,ZDHHC16,PYURF,ARCN1,ERGIC3,FAR2,KDSR,RAB21,BECN1,ATP2A2,SOAT1,MBTPS1,AHCYL1,EMC1,ERP44,AUP1,SEC24A,TTC9C,PGRMC1,KSR1,FAF2,EBPL,VAMP7,ALG1,SLC37A1,CANX,HACD2,OSBP,TKT,SLC35B4,SEC11A,HSP90B1,MOSPD3,OSTC,UBA1,RAB9A,ALG8,PITPNB,PLAUR,PLD1,TMEM109,TMCO1,P…
GO:0097255	R2TP complex	0.0001143	0.1088	0.001875	0.01395	4	5	RUVBL1,RUVBL2,PIH1D1,RPAP3
GO:0015935	small ribosomal subunit	0.0001179	0.1122	0.001902	0.01415	15	72	RPS8,RPS23,RPS25,RPS27A,MRPS28,MRPS23,MRPS35,MRPS21,MRPS15,MRPS9,MRPS5,DDX3X,MRPS16,MRPS7,EIF2D
GO:0005694	chromosome	0.0001275	0.1214	0.002023	0.01504	96	941	SEH1L,CHAF1B,ERCC4,FBL,BCAS2,MCM2,MCM3,SKA2,MCM6,MCM7,MCM10,ADD3,NUFIP1,CITED2,ALDOA,PHF6,APEX1,THOC5,NIFK,RUVBL1,NUP133,SMARCC1,NCOA1,CENPV,GINS2,WDR82,CCNB1IP1,GABPA,MYC,DHX36,ATR,RRP1B,DCTN5,MEIOB,NBN,SSB,SSRP1,RUVBL2,RCC2,STAT3,WDR43,ALKBH1,NEK2,RRS1,ZNF330,DPY30,PRPF19,TIMELESS,TCP1,BAZ1B,TERF2,MSH6,PES1,PRDX1,SUPT16H,CHEK2,HEY2,CDK4,MTA2,ORC6,PARK7,CHD4,HMGA1,HMGN3,UBA1,NABP2,ASF1A,EXOSC9,A…
GO:0030880	RNA polymerase complex	0.0001407	0.134	0.002196	0.01633	21	124	ERCC4,MCM3,INTS2,POLR1B,POLR3B,POLR3E,INTS9,TWISTNB,TAF8,TAF5,TAF12,TAF13,POLR3A,INTS5,GTF2H1,POLR1E,MED14,POLR1A,POLR2D,CTR9,PSMC5
GO:0005783	endoplasmic reticulum	0.0001502	0.143	0.002306	0.01715	158	1706	ZMPSTE24,AGPAT5,SIGMAR1,RPN2,MARCH2,LRRK2,RTN3,LRRC59,BFAR,ERMP1,CPED1,TLR8,SORT1,ATP8A1,STX18,MGST1,CCL2,POMK,FKBP3,SEC23B,SYNCRIP,UBE2J1,STIM2,HSD17B7,COPG1,RTCB,HACD3,SGK1,ANXA5,ANXA7,ZDHHC16,APEX1,PYURF,APP,AHSA1,ARCN1,EDEM3,YKT6,ERGIC3,FAR2,PSMG1,UGGT2,KDSR,RAB21,BECN1,ATP2A2,TRAPPC2L,SOAT1,DNAJB11,MBTPS1,AHCYL1,EMC1,ERP44,AUP1,SEC24A,SRP68,SRP72,SRPK1,TTC9C,PGRMC1,NKRF,KSR1,FAF2,EBPL,RRS1,V…
GO:0001650	fibrillar center	0.0001678	0.1598	0.002536	0.01886	5	9	UTP15,EIF3L,NCL,WDR43,UTP4
GO:0098803	respiratory chain complex	0.0001906	0.1815	0.002794	0.02078	14	67	UQCRHL,SDHD,NDUFA1,NDUFA9,NDUFAB1,NDUFB5,NDUFS1,PARK7,COX5A,UQCRFS1,PMPCB,COX6A1,COX7B,NDUFAF1
GO:0005746	mitochondrial respiratory chain	0.0001908	0.1816	0.002794	0.02078	15	75	UQCRHL,SDHD,NDUFA1,NDUFA9,NDUFAB1,NDUFB5,NDUFS1,OXA1L,PARK7,COX5A,UQCRFS1,PMPCB,COX6A1,COX7B,NDUFAF1
GO:0005839	proteasome core complex	0.0002841	0.2704	0.004098	0.03047	7	20	PSMF1,PSMA1,PSMA2,PSMA6,PSMB2,PSMB5,PSMB7
GO:0000177	cytoplasmic exosome (RNase complex)	0.0003408	0.3245	0.004843	0.03601	6	15	DIS3,SUPV3L1,EXOSC8,PNPT1,EXOSC9,EXOSC3
GO:0034455	t-UTP complex	0.0003733	0.3554	0.005122	0.03809	3	3	UTP4,NOL11,HEATR1
GO:0030956	glutamyl-tRNA(Gln) amidotransferase complex	0.0003733	0.3554	0.005122	0.03809	3	3	GATC,GATB,QRSL1
GO:0044440	endosomal part	0.0003766	0.3585	0.005122	0.03809	50	434	MARCH2,LRRK2,UBAP1,RPS27A,TLR8,RAB8A,SORT1,FCGR1A,OSBPL11,ATP6V0D2,ANKFY1,APP,MARCH3,TBK1,RAB21,BECN1,SNX5,GGA2,RCC2,VAMP7,AP3D1,VPS39,AP4E1,CD1C,CD14,TRAPPC10,CD68,ATP6V0A2,UBA1,CLCN4,SNX6,CLTA,PLD1,WDR44,GNPNAT1,APPL1,CTSL,CTSS,VPS33A,RAB7A,SNX27,RAB27A,LAMP1,LAMP2,VPS36,CHMP4B,SNX14,ARL8B,LRP6,STARD3NL
GO:1990204	oxidoreductase complex	0.0003889	0.3703	0.005215	0.03878	17	97	UQCRHL,SDHD,NCF2,BCKDHB,NDUFA1,NDUFA9,NDUFAB1,NDUFB5,NDUFS1,PDHA1,PDK1,PARK7,UQCRFS1,PMPCB,CYBB,DLAT,NDUFAF1
GO:0005753	mitochondrial proton-transporting ATP synthase complex	0.0004004	0.3812	0.005294	0.03937	7	21	ATP5F1A,ATP5PB,ATP5MC1,ATP5PF,ATP5MF,ATP5MPL,PPIF
GO:0010494	cytoplasmic stress granule	0.0004243	0.4039	0.005533	0.04115	9	34	IGF2BP1,PABPC4,ATXN2L,CIRBP,LSM14A,PUM1,DDX3X,G3BP1,OGFOD1
GO:0044437	vacuolar part	0.0004306	0.41	0.00554	0.0412	73	700	SPNS1,DRAM1,RPN2,ACPP,MARCH2,LRRK2,UBAP1,RPS27A,TLR8,RAB8A,SORT1,FCGR1A,OSBPL1A,OSBPL11,ATP6V0D2,ANKFY1,APP,AP3M1,ATP6V1H,ASAH1,MARCH3,TBK1,FUCA1,RAB21,BECN1,SNX5,GGA2,RCC2,VAMP7,ATP11A,AP3D1,VPS39,AP4E1,CD1C,CD14,GYG1,TRAPPC10,CD68,ATP6V0A2,HEXA,HEXB,UBA1,CLCN4,SNX6,CLTA,PLD1,WDR44,HSP90AB1,GNPNAT1,CTSA,VCAN,APPL1,CTSL,CTSS,VPS33A,HM13,PQLC2,LAPTM5,RAB7A,SNX27,ATP11C,RAB27A,VMP1,GOPC,LAMP1,LAMP2…
GO:0005844	polysome	0.0004768	0.454	0.005985	0.04451	11	49	ABCF1,IMPACT,RPS25,NUFIP2,FUS,GCN1,EIF4H,PSMA1,PSMA6,EEF2,EIF2AK4
GO:0071013	catalytic step 2 spliceosome	0.0004841	0.4609	0.005985	0.04451	16	90	BCAS2,SYNCRIP,RBM22,RBMX2,PPIL1,SNRPD1,SNRPF,SNRPN,HNRNPM,SF3A3,PRPF19,SF3B3,HNRNPF,EFTUD2,DHX8,HNRNPR
GO:0070469	respiratory chain	0.0004841	0.4609	0.005985	0.04451	16	90	UQCRHL,SDHD,NDUFA1,NDUFA9,NDUFAB1,NDUFB5,NDUFS1,OXA1L,PARK7,COX5A,UQCRFS1,PMPCB,COX6A1,COX7B,HIGD2A,NDUFAF1
GO:0042555	MCM complex	0.0005462	0.52	0.006667	0.04958	5	11	MCMBP,MCM2,MCM3,MCM6,MCM7
GO:0044427	chromosomal part	0.000599	0.5703	0.007219	0.05368	84	839	SEH1L,CHAF1B,ERCC4,BCAS2,MCM2,MCM3,SKA2,MCM6,MCM7,MCM10,NUFIP1,CITED2,ALDOA,PHF6,APEX1,THOC5,RUVBL1,NUP133,SMARCC1,NCOA1,CENPV,GINS2,WDR82,CCNB1IP1,GABPA,MYC,DHX36,ATR,RRP1B,DCTN5,NBN,SSB,RUVBL2,RCC2,STAT3,WDR43,ALKBH1,NEK2,ZNF330,DPY30,PRPF19,TIMELESS,TCP1,BAZ1B,TERF2,MSH6,PRDX1,CHEK2,HEY2,CDK4,MTA2,ORC6,PARK7,CHD4,HMGA1,HMGN3,UBA1,NABP2,ASF1A,AHCTF1,NUDCD2,XRCC5,PPP1CC,CTR9,CENPH,PRKDC,HMGN5,EI…
GO:0031965	nuclear membrane	0.0006178	0.5881	0.007352	0.05467	36	290	ZMPSTE24,SIGMAR1,BRAP,SORT1,INTS2,HACD3,NDC1,MRPS23,NUP133,TXLNG,DPY19L3,DCTN5,NUP205,WDR3,RRP12,TMEM97,TNPO3,CDK4,DDX19B,GTPBP4,TMEM109,GSTO1,ZNF383,AHCTF1,EI24,MRPS15,NUP93,KPNB1,TNPO1,IPO5,AKIRIN1,LRPPRC,LMNB1,RNF6,SENP2,MRTO4
GO:0000243	commitment complex	0.0007122	0.678	0.008371	0.06225	4	7	SNRPC,SNRPD1,U2AF2,PRPF39
GO:0045259	proton-transporting ATP synthase complex	0.0007457	0.7099	0.008557	0.06363	7	23	ATP5F1A,ATP5PB,ATP5MC1,ATP5PF,ATP5MF,ATP5MPL,PPIF
GO:0005685	U1 snRNP	0.000746	0.7102	0.008557	0.06363	6	17	SNRPA,SNRPC,SNRPD1,SNRPF,SNRPN,PRPF39
GO:0000323	lytic vacuole	0.0007661	0.7293	0.00858	0.06381	58	539	SPNS1,DRAM1,ACPP,MARCH2,LRRK2,TLR8,SORT1,OSBPL1A,MPO,ANKFY1,AP3M1,ATP6V1H,ASAH1,MARCH3,FUCA1,SNAP23,NCF2,VAMP7,TMEM97,ATP11A,AP3D1,GOT1,VPS39,CD1C,GYG1,CD68,ATP6V0A2,HEXA,HEXB,CTSC,UBA1,RAB9A,CLTA,PLD1,HSP90AB1,CTSA,IFNAR1,VCAN,CTSL,CTSS,ZC3HAV1,VPS33A,HM13,PQLC2,LAPTM5,RAB7A,ATP11C,RAB27A,GOPC,LAMP1,LAMP2,VPS36,PLBD2,SNX14,ARL8B,STARD3NL,LYN,NBR1
GO:0005764	lysosome	0.0007661	0.7293	0.00858	0.06381	58	539	SPNS1,DRAM1,ACPP,MARCH2,LRRK2,TLR8,SORT1,OSBPL1A,MPO,ANKFY1,AP3M1,ATP6V1H,ASAH1,MARCH3,FUCA1,SNAP23,NCF2,VAMP7,TMEM97,ATP11A,AP3D1,GOT1,VPS39,CD1C,GYG1,CD68,ATP6V0A2,HEXA,HEXB,CTSC,UBA1,RAB9A,CLTA,PLD1,HSP90AB1,CTSA,IFNAR1,VCAN,CTSL,CTSS,ZC3HAV1,VPS33A,HM13,PQLC2,LAPTM5,RAB7A,ATP11C,RAB27A,GOPC,LAMP1,LAMP2,VPS36,PLBD2,SNX14,ARL8B,STARD3NL,LYN,NBR1
GO:0016607	nuclear speck	0.0008716	0.8297	0.009648	0.07175	27	201	SMNDC1,ADAR,DUSP11,APEX1,TIMM50,WBP11,RAD54L2,PSME4,RNPS1,SF3A3,PRPF19,NONO,NOC3L,PIAS2,PRPF4,WBP4,ATXN2L,U2AF2,EFTUD2,RBM27,RCHY1,VIRMA,PPP1CC,CTR9,PRPF31,DDX3X,THRAP3
GO:0034709	methylosome	0.0008824	0.84	0.009656	0.0718	5	12	PRMT5,SNRPD1,SNRPF,CLNS1A,WDR77
GO:0000781	chromosome, telomeric region	0.0009591	0.913	0.01033	0.07685	23	162	ERCC4,MCM2,MCM3,MCM6,MCM7,APEX1,THOC5,WDR82,DHX36,ATR,NBN,SSB,DPY30,TERF2,CHEK2,NABP2,XRCC5,PPP1CC,PRKDC,PINX1,UPF1,NAT10,RPA2
GO:0061695	transferase complex, transferring phosphorus-containing groups	0.0009749	0.9281	0.01033	0.07685	31	244	ERCC4,MCM3,PIK3R4,INTS2,POLR1B,POLR3B,POLR3E,INTS9,BECN1,TWISTNB,TAF8,TAF5,TAF12,TAF13,POLR3A,TGFBR1,INTS5,GTF2H1,POLR1E,CDK4,MED14,CHUK,PHKA1,PIK3R1,POLR1A,POLR2D,BCCIP,CTR9,PRKAR2A,PRPSAP2,PSMC5
GO:0000784	nuclear chromosome, telomeric region	0.000977	0.9301	0.01033	0.07685	20	133	ERCC4,MCM2,MCM3,MCM6,MCM7,APEX1,THOC5,WDR82,ATR,NBN,SSB,TERF2,NABP2,XRCC5,PPP1CC,PRKDC,PINX1,UPF1,NAT10,RPA2
GO:0022624	proteasome accessory complex	0.0009895	0.942	0.01035	0.07698	7	24	PSMC4,PSMC5,PSMD3,PSMD7,PSMD11,PSME2,PSME3
GO:0000228	nuclear chromosome	0.001034	0.984	0.0107	0.07953	60	569	CHAF1B,ERCC4,BCAS2,MCM2,MCM3,MCM6,MCM7,MCM10,ADD3,NUFIP1,CITED2,ALDOA,APEX1,THOC5,NIFK,RUVBL1,SMARCC1,NCOA1,GINS2,WDR82,CCNB1IP1,GABPA,MYC,ATR,NBN,SSB,RUVBL2,STAT3,ALKBH1,NEK2,RRS1,PRPF19,TIMELESS,TCP1,BAZ1B,TERF2,MSH6,PRDX1,HEY2,MTA2,ORC6,CHD4,NABP2,ASF1A,EXOSC9,XRCC5,PPP1CC,PRKDC,NOL6,SMARCAD1,DFFA,TIPIN,NCAPD2,PINX1,ACTR8,UPF1,LRPPRC,NAT10,RPA2,SMAD4
GO:0098687	chromosomal region	0.001161	1	0.01188	0.08837	40	344	SEH1L,ERCC4,MCM2,MCM3,SKA2,MCM6,MCM7,PHF6,APEX1,THOC5,NUP133,CENPV,WDR82,DHX36,ATR,DCTN5,NBN,SSB,RCC2,WDR43,NEK2,ZNF330,DPY30,BAZ1B,TERF2,CHEK2,NABP2,AHCTF1,NUDCD2,XRCC5,PPP1CC,CENPH,PRKDC,SPDL1,NCAPD2,PINX1,UPF1,CDCA8,NAT10,RPA2
GO:0034399	nuclear periphery	0.00118	1	0.01195	0.08885	20	135	ZNF326,NUFIP1,RUVBL1,HNRNPM,SRPK1,RUVBL2,NUP205,EBNA1BP2,NONO,PHB2,ERCC8,AHCTF1,NUP93,PSMA6,SMARCAD1,KPNB1,TNPO1,IPO5,LMNB1,DCAF7
GO:0005850	eukaryotic translation initiation factor 2 complex	0.00131	1	0.01313	0.09763	3	4	EIF2S2,EIF2B1,EIF2A
GO:0016469	proton-transporting two-sector ATPase complex	0.001573	1	0.0156	0.116	10	48	ATP6V0D2,ATP6V1H,ATP5F1A,ATP5PB,ATP5MC1,ATP5PF,ATP6V0A2,ATP5MF,ATP5MPL,PPIF
GO:0022626	cytosolic ribosome	0.001599	1	0.0157	0.1167	18	119	RPL29,RPS8,RPS23,RPS25,RPS27A,NUFIP1,ZCCHC17,COA1,METAP1,MRPS5,RSL1D1,DDX3X,EIF2D,MRTO4,EIF2AK4,RSL24D1,RPL9,RPL12
GO:0031305	integral component of mitochondrial inner membrane	0.001662	1	0.01614	0.1201	7	26	APOOL,PTPMT1,COA1,AFG3L2,COX18,C19orf70,APOO
GO:0010008	endosome membrane	0.001965	1	0.0189	0.1405	44	399	MARCH2,UBAP1,RPS27A,TLR8,RAB8A,SORT1,FCGR1A,OSBPL11,ATP6V0D2,ANKFY1,MARCH3,TBK1,RAB21,BECN1,SNX5,GGA2,RCC2,VAMP7,AP3D1,VPS39,CD1C,CD14,CD68,ATP6V0A2,UBA1,CLCN4,SNX6,CLTA,PLD1,WDR44,GNPNAT1,APPL1,VPS33A,RAB7A,SNX27,RAB27A,LAMP1,LAMP2,VPS36,CHMP4B,SNX14,ARL8B,LRP6,STARD3NL
GO:0005765	lysosomal membrane	0.002026	1	0.0191	0.142	33	277	SPNS1,DRAM1,ACPP,MARCH2,TLR8,SORT1,OSBPL1A,ANKFY1,AP3M1,ATP6V1H,VAMP7,ATP11A,AP3D1,VPS39,CD68,ATP6V0A2,UBA1,CLTA,PLD1,HSP90AB1,CTSA,VPS33A,HM13,PQLC2,LAPTM5,RAB7A,ATP11C,GOPC,LAMP1,LAMP2,SNX14,ARL8B,STARD3NL
GO:0098852	lytic vacuole membrane	0.002026	1	0.0191	0.142	33	277	SPNS1,DRAM1,ACPP,MARCH2,TLR8,SORT1,OSBPL1A,ANKFY1,AP3M1,ATP6V1H,VAMP7,ATP11A,AP3D1,VPS39,CD68,ATP6V0A2,UBA1,CLTA,PLD1,HSP90AB1,CTSA,VPS33A,HM13,PQLC2,LAPTM5,RAB7A,ATP11C,GOPC,LAMP1,LAMP2,SNX14,ARL8B,STARD3NL
GO:0031304	intrinsic component of mitochondrial inner membrane	0.002109	1	0.01969	0.1464	7	27	APOOL,PTPMT1,COA1,AFG3L2,COX18,C19orf70,APOO
GO:0005744	mitochondrial inner membrane presequence translocase complex	0.002287	1	0.02094	0.1557	4	9	SLC25A6,TIMM21,TIMM50,TIMM10
GO:0000276	mitochondrial proton-transporting ATP synthase complex, coupling factor F(o)	0.002287	1	0.02094	0.1557	4	9	ATP5PB,ATP5MC1,ATP5PF,ATP5MF
GO:0000178	exosome (RNase complex)	0.002566	1	0.02309	0.1717	6	21	DIS3,SUPV3L1,EXOSC8,PNPT1,EXOSC9,EXOSC3
GO:0042470	melanosome	0.002625	1	0.02309	0.1717	16	105	AHCY,GPNMB,MMP14,CCT4,CANX,PRDX1,HSP90B1,SERPINF1,HSP90AB1,PPIB,RAB7A,RAB1A,RAB27A,RAN,LAMP1,TMEM33
GO:0048770	pigment granule	0.002625	1	0.02309	0.1717	16	105	AHCY,GPNMB,MMP14,CCT4,CANX,PRDX1,HSP90B1,SERPINF1,HSP90AB1,PPIB,RAB7A,RAB1A,RAB27A,RAN,LAMP1,TMEM33
GO:0071339	MLL1 complex	0.002644	1	0.02309	0.1717	7	28	MAX,CHD8,RUVBL1,RUVBL2,WDR5,PRPF31,LAS1L
GO:0044665	MLL1/2 complex	0.002644	1	0.02309	0.1717	7	28	MAX,CHD8,RUVBL1,RUVBL2,WDR5,PRPF31,LAS1L
GO:0005774	vacuolar membrane	0.002716	1	0.02337	0.1738	60	593	SPNS1,DRAM1,RPN2,ACPP,MARCH2,UBAP1,RPS27A,TLR8,RAB8A,SORT1,FCGR1A,OSBPL1A,OSBPL11,ATP6V0D2,ANKFY1,AP3M1,ATP6V1H,MARCH3,TBK1,RAB21,BECN1,SNX5,GGA2,RCC2,VAMP7,ATP11A,AP3D1,VPS39,CD1C,CD14,CD68,ATP6V0A2,UBA1,CLCN4,SNX6,CLTA,PLD1,WDR44,HSP90AB1,GNPNAT1,CTSA,APPL1,VPS33A,HM13,PQLC2,LAPTM5,RAB7A,SNX27,ATP11C,RAB27A,VMP1,GOPC,LAMP1,LAMP2,VPS36,CHMP4B,SNX14,ARL8B,LRP6,STARD3NL
GO:0031968	organelle outer membrane	0.002725	1	0.02337	0.1738	25	196	AGPAT5,SIGMAR1,RPS6KB1,LRRK2,TOMM5,MGST1,TOMM40,COASY,OPA1,AIFM1,PEBP1,PHB2,PHB,MIEF1,TMEM109,PMAIP1,VDAC1,VDAC2,PPP1CC,BRI3BP,CYB5A,DDX3X,TOMM70,LRPPRC,RHOT1
GO:0030670	phagocytic vesicle membrane	0.002761	1	0.02347	0.1745	11	60	RAB8A,PIK3R4,ATP6V0D2,VAMP7,RAB31,ATP6V0A2,RAB9A,CYBB,RAB7A,LAMP1,LAMP2
GO:0098796	membrane protein complex	0.002828	1	0.02383	0.1772	98	1059	LIN7C,RPN2,APOOL,UBAP1,TOMM5,PIK3R4,STX18,TOMM40,ATP6V0D2,UQCRHL,SEC23B,SDHD,ANKFY1,COPG1,SLC25A6,AP3M1,ARCN1,ATP6V1H,YKT6,TIMM21,TIMM50,ATP1B1,BECN1,ATP2A2,ATP5F1A,SNX5,ATP5PB,ATP5MC1,ATP5PF,GGA2,EMC1,AUP1,SEC24A,SNAP23,NCF2,NDUFA1,NDUFA9,NDUFAB1,NDUFB5,NDUFS1,FAF2,AFG3L2,VAMP7,DENND5A,AP3D1,VPS39,GRB2,CBL,TGFBR1,AP4E1,CD14,ATP6V0A2,C19orf70,CORO1C,PARK7,CHUK,OSTC,COX5A,SNX6,PIK3R1,CLTA,UQCRFS1,…
GO:0034388	Pwp2p-containing subcomplex of 90S preribosome	0.003099	1	0.02588	0.1925	3	5	UTP6,WDR3,UTP18
GO:0045335	phagocytic vesicle	0.003164	1	0.02619	0.1948	14	88	RAB8A,PIK3R4,ATP6V0D2,BECN1,NCF2,VAMP7,RAB31,ATP6V0A2,RAB9A,CYBB,ITGAV,RAB7A,LAMP1,LAMP2
GO:0005758	mitochondrial intermembrane space	0.003238	1	0.02658	0.1976	13	79	THEM4,NDUFS1,OPA1,AIFM1,PARK7,PNPT1,COA6,SDHAF3,CIAPIN1,TRAP1,TIMM10,TIMM9,LYN
GO:0005732	small nucleolar ribonucleoprotein complex	0.003321	1	0.02703	0.201	6	22	FBL,NAF1,NOP56,NOP58,SNRPF,DKC1
GO:0031314	extrinsic component of mitochondrial inner membrane	0.003601	1	0.02881	0.2142	4	10	NOA1,COQ3,OPA1,COQ7
GO:0005687	U4 snRNP	0.003601	1	0.02881	0.2142	4	10	SNRPD1,SNRPF,SNRPN,PRPF31
GO:0032592	integral component of mitochondrial membrane	0.003928	1	0.03116	0.2317	10	54	APOOL,TOMM40,PTPMT1,COA1,AFG3L2,COX18,OXA1L,C19orf70,APOO,RHOT1
GO:0005770	late endosome	0.004198	1	0.03274	0.2435	27	224	ACPP,LRRK2,PIK3R4,OSBPL1A,OSBPL11,ANKRD13A,VAMP7,RAB31,VPS39,RAB9A,CLCN4,PLD1,DERL1,GNPNAT1,IFNAR1,ZC3HAV1,VPS33A,RAB7A,RAB27A,LAMP1,LAMP2,VPS36,CHMP4B,SNX14,ARL8B,STARD3NL,NBR1
GO:0033177	proton-transporting two-sector ATPase complex, proton-transporting domain	0.00423	1	0.03274	0.2435	6	23	ATP6V0D2,ATP5PB,ATP5MC1,ATP5PF,ATP6V0A2,ATP5MF
GO:0030904	retromer complex	0.00423	1	0.03274	0.2435	6	23	ANKFY1,SNX5,DENND5A,SNX6,RAB7A,SNX27
GO:0005741	mitochondrial outer membrane	0.004268	1	0.03277	0.2437	22	171	AGPAT5,RPS6KB1,LRRK2,TOMM5,MGST1,TOMM40,COASY,OPA1,AIFM1,PEBP1,PHB2,PHB,MIEF1,PMAIP1,VDAC1,VDAC2,PPP1CC,BRI3BP,CYB5A,DDX3X,TOMM70,RHOT1
GO:0031970	organelle envelope lumen	0.004322	1	0.0328	0.2439	14	91	APP,THEM4,NDUFS1,OPA1,AIFM1,PARK7,PNPT1,COA6,SDHAF3,CIAPIN1,TRAP1,TIMM10,TIMM9,LYN
GO:0019867	outer membrane	0.004341	1	0.0328	0.2439	25	203	AGPAT5,SIGMAR1,RPS6KB1,LRRK2,TOMM5,MGST1,TOMM40,COASY,OPA1,AIFM1,PEBP1,PHB2,PHB,MIEF1,TMEM109,PMAIP1,VDAC1,VDAC2,PPP1CC,BRI3BP,CYB5A,DDX3X,TOMM70,LRPPRC,RHOT1
GO:0005684	U2-type spliceosomal complex	0.004884	1	0.03661	0.2722	7	31	RBM22,SNRPC,SNRPD1,SNRPN,U2AF2,PRPF31,PRPF39
GO:0034719	SMN-Sm protein complex	0.005132	1	0.03743	0.2783	5	17	SMN2,SNRPD1,SNRPF,GEMIN5,GEMIN7
GO:0098573	intrinsic component of mitochondrial membrane	0.005147	1	0.03743	0.2783	10	56	APOOL,TOMM40,PTPMT1,COA1,AFG3L2,COX18,OXA1L,C19orf70,APOO,RHOT1
GO:0070069	cytochrome complex	0.005311	1	0.03743	0.2783	6	24	UQCRHL,COX5A,UQCRFS1,PMPCB,COX6A1,COX7B
GO:0045244	succinate-CoA ligase complex (GDP-forming)	0.005325	1	0.03743	0.2783	2	2	SUCLG2,SUCLG1
GO:0009368	endopeptidase Clp complex	0.005325	1	0.03743	0.2783	2	2	CLPP,CLPX
GO:0042709	succinate-CoA ligase complex	0.005325	1	0.03743	0.2783	2	2	SUCLG2,SUCLG1
GO:0045025	mitochondrial degradosome	0.005325	1	0.03743	0.2783	2	2	SUPV3L1,PNPT1
GO:0042565	RNA nuclear export complex	0.005325	1	0.03743	0.2783	2	2	XPO5,RAN
GO:0097504	Gemini of coiled bodies	0.005347	1	0.03743	0.2783	4	11	SMN2,ZPR1,GEMIN5,GEMIN7
GO:0033588	Elongator holoenzyme complex	0.005875	1	0.03857	0.2868	3	6	ELP5,ELP3,ELP2
GO:0005851	eukaryotic translation initiation factor 2B complex	0.005875	1	0.03857	0.2868	3	6	EIF2B3,EIF2B5,EIF2B1
GO:0034715	pICln-Sm protein complex	0.005875	1	0.03857	0.2868	3	6	SNRPD1,SNRPF,CLNS1A
GO:0048500	signal recognition particle	0.005875	1	0.03857	0.2868	3	6	SRP19,SRP68,SRP72
GO:0000127	transcription factor TFIIIC complex	0.005875	1	0.03857	0.2868	3	6	GTF3C1,GTF3C2,GTF3C6
GO:0061617	MICOS complex	0.005875	1	0.03857	0.2868	3	6	APOOL,C19orf70,APOO
GO:0071204	histone pre-mRNA 3'end processing complex	0.005875	1	0.03857	0.2868	3	6	SYNCRIP,ERI1,SLBP
GO:0031428	box C/D snoRNP complex	0.005875	1	0.03857	0.2868	3	6	FBL,NOP56,NOP58
GO:0005786	signal recognition particle, endoplasmic reticulum targeting	0.005875	1	0.03857	0.2868	3	6	SRP19,SRP68,SRP72
GO:0044454	nuclear chromosome part	0.00608	1	0.03964	0.2948	53	531	CHAF1B,ERCC4,BCAS2,MCM2,MCM3,MCM6,MCM7,MCM10,NUFIP1,CITED2,ALDOA,APEX1,THOC5,RUVBL1,SMARCC1,NCOA1,GINS2,WDR82,CCNB1IP1,GABPA,MYC,ATR,NBN,SSB,RUVBL2,STAT3,ALKBH1,PRPF19,TIMELESS,TCP1,BAZ1B,TERF2,MSH6,PRDX1,HEY2,MTA2,ORC6,CHD4,NABP2,ASF1A,XRCC5,PPP1CC,PRKDC,SMARCAD1,DFFA,TIPIN,NCAPD2,PINX1,ACTR8,UPF1,NAT10,RPA2,SMAD4
GO:0005768	endosome	0.006409	1	0.0415	0.3086	77	826	ACPP,MARCH2,LRRK2,UBAP1,RPS27A,TLR8,RAB8A,SORT1,PIK3R4,FCGR1A,OSBPL1A,OSBPL11,ATP6V0D2,MMP14,WDFY1,ANKFY1,ARFGEF2,APP,ANKRD13A,YKT6,MARCH3,TBK1,RAB21,BECN1,SNX5,GGA2,TUBGCP4,RCC2,VAMP7,TBC1D12,ATP11A,AP3D1,RAB31,VPS39,GRB2,TGFBR1,AP4E1,USP10,CD1C,CD14,TRAPPC10,CD68,ATP6V0A2,PHB,UBA1,RAB9A,CLCN4,SNX6,CLTA,PLD1,WDR44,DERL1,GNPNAT1,IFNAR1,APPL1,CTSL,CTSS,ZC3HAV1,VPS33A,BLOC1S6,OCIAD1,DIAPH2,RAB7A,SN…
GO:0042582	azurophil granule	0.0067	1	0.04281	0.3184	5	18	MPO,SNAP23,VAMP7,HEXA,HEXB
GO:0005766	primary lysosome	0.0067	1	0.04281	0.3184	5	18	MPO,SNAP23,VAMP7,HEXA,HEXB
GO:0043596	nuclear replication fork	0.006879	1	0.04366	0.3247	8	41	BCAS2,MCM3,MCM10,GINS2,PRPF19,BAZ1B,SMARCAD1,RPA2
GO:0031312	extrinsic component of organelle membrane	0.007019	1	0.04425	0.3291	7	33	NOA1,SNX5,COQ3,OPA1,PHB,RAB7A,COQ7

## Sheet: GO_CC_AB
ID	Name	p-value	q-value Bonferroni	q-value FDR B&H	q-value FDR B&Y	Hit Count in Query List	Hit Count in Genome	Hit in Query List
GO:0098552	side of membrane	8.061e-05	0.02571	0.02571	0.1631	13	510	HLA-B,HLA-F,ADA,MAP3K5,SERPINE2,FCER1A,MS4A2,PPP1R9B,FAS,LGALS3,CD69,TNK2,BCAM
GO:0032993	protein-DNA complex	0.0003612	0.1152	0.04379	0.2778	7	183	ESR2,HIST1H2AK,JUND,HIST1H3B,POLE2,HIST1H1C,HIST1H1B
GO:0009897	external side of plasma membrane	0.0004118	0.1314	0.04379	0.2778	9	310	ADA,MAP3K5,SERPINE2,FCER1A,MS4A2,FAS,LGALS3,CD69,BCAM
