# Supplementary material for: Comparison of gene expression profiles between human erythroid cells derived from fetal liver and adult peripheral blood
Source: PeerJ. 2018 Aug 31;6:e5527. doi: 10.7717/peerj.5527 (PMC6120446; doi:10.7717/peerj.5527)
Supplement: Table S4 — The fold change values and p-values are shown for significant genes obtained from RankProd meta-analysis of the combined microarray dataset of this study and the Xu et al. study (Xu et al., 2012). [file peerj-06-5527-s009.xlsx]

## Sheet: FL up-regulated
Symbol	Description	FC (present study)	FC (Xu et al.)	adj.P-value (present study)	adj.P-value (Xu et al.)	FC (meta-analysis)	adj.P-value (meta-analysis)
HBZ	hemoglobin subunit zeta	66.0569	94.2054	5.26e-06	0.00634758	78.8644	3.277e-24
HBE1	hemoglobin subunit epsilon 1	13.8634	11.3441	3.18e-05	0.0322089	12.5408	5.111e-17
LIN28B	lin-28 homolog B	4.74735	30.2034	6.96e-06	0.00487864	11.9746	1.112e-13
IGF2BP3	insulin like growth factor 2 mRNA binding protein 3	4.50244	43.3614	3.98e-06	0.00672766	13.9723	1.445e-13
TUBB1	tubulin beta 1 class VI	5.0012	4.00612	0.000138011	0.0306466	4.47628	8.925e-11
PRTN3	proteinase 3	4.30719	7.11633	0.000344067	0.0637019	5.5371	9.678e-11
NETO2	neuropilin and tolloid like 2	9.5261	1.18482	1.1e-06	0.442951	3.35909	1.367e-10
LYZ	lysozyme	4.10011	15.5392	0.0358018	0.0501155	7.98085	1.444e-10
IGF2BP1	insulin like growth factor 2 mRNA binding protein 1	4.16538	5.47004	0.000203443	0.0297654	4.77327	2.141e-10
SPP1	secreted phosphoprotein 1	14.9611	1.05235	0.00260581	0.707587	3.96825	2.301e-10
MT1H	metallothionein 1H	4.95579	6.62325	0.0663201	0.107821	5.73066	6.443e-10
MPO	myeloperoxidase	5.09695	2.25824	0.000831829	0.41036	3.39213	2.616e-09
GPI	glucose-6-phosphate isomerase	3.92864	6.30473	0.00328391	0.282598	4.9776	4.715e-09
SLC38A1	solute carrier family 38 member 1	4.0935	3.16568	0.00229948	0.0250711	3.59971	5.545e-09
BCAT1	branched chain amino acid transaminase 1	4.09314	1.81035	1e-05	0.0765615	2.72183	2.91e-08
CCL2	C-C motif chemokine ligand 2	7.59407	-1.11967	0.0027825	0.407518	2.60417	7.896e-08
CHD7	chromodomain helicase DNA binding protein 7	3.67746	1.84914	0.000114124	0.136625	2.60756	1.005e-07
CPED1	cadherin like and PC-esterase domain containing 1	2.74318	7.80206	0.00248338	0.0431766	4.62535	1.151e-07
LCP1	lymphocyte cytosolic protein 1	3.21216	2.76028	0.00167302	0.0144424	2.97796	2.376e-07
GPNMB	glycoprotein nmb	2.64848	7.38974	0.0037105	0.0463846	4.42478	2.502e-07
BNIP3	BCL2 interacting protein 3	2.85927	4.93561	0.0819504	0.238589	3.75657	3.468e-07
CCDC50	coiled-coil domain containing 50	3.04008	2.38437	1.76e-05	0.0128455	2.69251	4.111e-07
MGST1	microsomal glutathione S-transferase 1	2.65767	4.90731	0.000222695	0.0422137	3.61141	4.156e-07
SMAD6	SMAD family member 6	3.59128	1.51892	0.000859204	0.111399	2.33536	6.843e-07
TUBB6	tubulin beta 6 class V	3.06184	2.04652	2.22e-05	0.0131899	2.50313	7.394e-07
LYN	LYN proto-oncogene, Src family tyrosine kinase	2.90837	2.85218	0.00172675	0.0595733	2.88018	7.742e-07
TGFBR1	transforming growth factor beta receptor 1	3.18461	1.82501	0.00223034	0.0128455	2.4108	1.604e-06
RAB31	RAB31, member RAS oncogene family	2.62848	4.01202	0.0288657	0.00923569	3.24781	2.099e-06
CCDC68	coiled-coil domain containing 68	3.99764	1.06433	0.000692673	0.81519	2.06271	2.122e-06
AIF1	allograft inflammatory factor 1	3.35642	1.61162	0.00365702	0.0411403	2.32558	2.161e-06
PLA2G7	phospholipase A2 group VII	4.91128	1.00841	0.00825954	0.82789	2.22568	2.195e-06
MT1G	metallothionein 1G	2.27138	4.78772	0.40138	0.124647	3.29815	2.198e-06
ANXA5	annexin A5	2.82175	2.70724	0.0109891	0.257988	2.76396	2.254e-06
SNORD114-3	small nucleolar RNA, C/D box 114-3	3.31502	1.49062	0.00212121	0.0492687	2.22272	2.988e-06
LAPTM4B	lysosomal protein transmembrane 4 beta	2.41959	4.75002	0.0072852	0.009239	3.38983	4.064e-06
MT1X	metallothionein 1X	2.37084	5.7133	0.0334456	0.118877	3.68053	4.742e-06
HDDC2	HD domain containing 2	2.69057	2.33215	0.000721761	0.0413005	2.50501	5.168e-06
SERPINI1	serpin family I member 1	2.83556	2.25168	0.0120387	0.0692436	2.52653	5.769e-06
PGK1	phosphoglycerate kinase 1	2.09555	7.40135	0.00220976	0.0501155	3.93856	9.11e-06
ICAM4	intercellular adhesion molecule 4 (Landsteiner-Wiener blood group)	2.68073	1.98182	0.000150001	0.0550389	2.30468	1.022e-05
LDHA	lactate dehydrogenase A	2.31031	6.16807	0.0148395	0.188432	3.77501	1.03e-05
S100A8	S100 calcium binding protein A8	2.71691	2.56352	0.0411211	0.286014	2.63922	1.14e-05
CDCA7	cell division cycle associated 7	2.33305	4.5857	0.0275568	0.00923569	3.27118	1.248e-05
LRRC8D	leucine rich repeat containing 8 VRAC subunit D	2.4217	2.85475	0.00153275	0.0805325	2.6295	1.546e-05
VCAN	versican	2.87942	1.93848	0.00825208	0.342619	2.36239	1.57e-05
HBG1	hemoglobin subunit gamma 1	2.89392	1.58975	0.0062923	0.0176951	2.145	1.604e-05
STON2	stonin 2	2.171	4.79012	0.000629979	0.0229945	3.22477	1.625e-05
PIK3R1	phosphoinositide-3-kinase regulatory subunit 1	2.41131	2.52518	0.00180554	0.0387608	2.46731	2.257e-05
HEY2	hes related family bHLH transcription factor with YRPW motif 2	2.74854	1.59917	0.00108696	0.123996	2.09644	2.526e-05
PROS1	protein S	2.49151	2.09425	0.000344067	0.0737454	2.28415	2.733e-05
CCNJ	cyclin J	2.51722	2.10209	0.0035808	0.0788619	2.30044	2.839e-05
ENO1	enolase 1	1.94134	10.9647	0.00185903	0.102226	4.61467	3.222e-05
LMAN1	lectin, mannose binding 1	2.61245	1.83591	0.00223034	0.0724292	2.1901	3.232e-05
IQGAP2	IQ motif containing GTPase activating protein 2	2.55344	2.02129	0.00150493	0.177716	2.27169	3.304e-05
TRAP1	TNF receptor associated protein 1	2.61432	1.8496	0.00559749	0.11526	2.19877	3.469e-05
NOB1	NIN1/PSMD8 binding protein 1 homolog	2.51616	1.6697	0.00175414	0.32141	2.0496	3.614e-05
MIPEP	mitochondrial intermediate peptidase	1.79966	15.2052	0.00831861	0.0307844	5.23013	3.665e-05
PRKD3	protein kinase D3	2.18413	3.35762	0.000617389	0.0252989	2.70783	4.095e-05
C1QBP	complement C1q binding protein	2.34478	2.29208	0.00240374	0.082844	2.31803	5.275e-05
MMP9	matrix metallopeptidase 9	3.33095	1.07261	0.00523595	0.474451	1.89036	5.339e-05
RAVER2	ribonucleoprotein, PTB binding 2	3.41242	-1.26002	0.000629979	0.463125	1.64555	5.36e-05
CD14	CD14 molecule	3.47966	-1.06735	0.0034812	0.422294	1.80571	5.793e-05
CYBB	cytochrome b-245 beta chain	3.26371	1.06904	0.00690135	0.577099	1.86776	5.828e-05
SERPINF1	serpin family F member 1	2.6805	1.4487	0.0032424	0.0852297	1.97044	5.834e-05
FZD3	frizzled class receptor 3	2.27682	2.453	0.00242466	0.0787107	2.36351	5.864e-05
APPL1	adaptor protein, phosphotyrosine interacting with PH domain and leucine zipper 1	2.17446	3.03869	0.00170727	0.033767	2.57069	5.951e-05
SNHG16	small nucleolar RNA host gene 16	2.57429	1.61708	0.000697262	0.146912	2.0404	6.002e-05
CD68	CD68 molecule	2.96827	1.2314	0.00762531	0.176574	1.91168	7.639e-05
SLCO4C1	solute carrier organic anion transporter family member 4C1	2.57438	1.63662	0.0126576	0.0419536	2.05255	8.267e-05
SLC16A9	solute carrier family 16 member 9	2.48899	1.68668	0.00339338	0.126771	2.04876	8.546e-05
DENND5A	DENN domain containing 5A	2.19748	2.52892	0.0013359	0.0466297	2.35738	8.655e-05
NCKAP1	NCK associated protein 1	2.95401	1.1461	0.0034951	0.22748	1.83993	8.996e-05
MPEG1	macrophage expressed 1	3.2179	-1.01407	0.00427012	0.855456	1.78126	9.792e-05
NOLC1	nucleolar and coiled-body phosphoprotein 1	2.51627	1.61742	0.00616564	0.0592892	2.01735	9.798e-05
CTSS	cathepsin S	2.74506	1.3875	0.0216252	0.169179	1.9516	0.0001122
MAPKAPK3	mitogen-activated protein kinase-activated protein kinase 3	2.18709	2.35603	0.00176576	0.0149133	2.27015	0.0001184
HMGA1	high mobility group AT-hook 1	2.35442	1.70589	0.000555668	0.0619623	2.00401	0.0001427
HSPA4L	heat shock protein family A (Hsp70) member 4 like	1.87624	5.36852	0.0216227	0.00923569	3.1736	0.0001432
KRT13	keratin 13	1.79711	6.8827	0.0238587	0.0161542	3.51741	0.0001712
WDR43	WD repeat domain 43	2.28717	1.86333	0.00745339	0.0517956	2.06441	0.0001757
CPT2	carnitine palmitoyltransferase 2	2.3477	1.62268	0.000258402	0.0695281	1.95198	0.0001772
DLAT	dihydrolipoamide S-acetyltransferase	2.26457	1.96248	0.00498702	0.0595941	2.10793	0.0001777
KSR1	kinase suppressor of ras 1	1.71818	9.32847	0.00684177	0.0125903	4.0032	0.000184
GATA5	GATA binding protein 5	1.56842	17.3335	0.0187183	0.0273827	5.21376	0.0001863
IMPACT	impact RWD domain protein	2.64471	1.26613	0.00205242	0.481266	1.82983	0.0001895
PLAG1	PLAG1 zinc finger	2.38779	1.55764	0.00354966	0.136625	1.92864	0.000191
C6orf211	Chromosome 6 Open Reading Frame 211	2.13638	2.30468	0.00240374	0.0313205	2.21877	0.0001911
DDX19B	DEAD-box helicase 19B	2.80951	1.06784	0.000344067	0.40046	1.7322	0.0001976
LAPTM5	lysosomal protein transmembrane 5	2.16197	2.41013	0.0320608	0.117199	2.28258	0.0002017
THBS1	thrombospondin 1	1.87241	4.23354	0.0195635	0.0657766	2.81532	0.0002235
PM20D2	peptidase M20 domain containing 2	2.98595	-1.04723	0.00474601	0.85946	1.68862	0.0002353
MSN	moesin	2.10814	2.658	0.015958	0.129638	2.36742	0.0002356
ZNF322	zinc finger protein 322	2.72494	1.14138	0.00241262	0.384973	1.76367	0.0002525
PKM	pyruvate kinase M1/2	1.6485	10.7329	0.016102	0.0348934	4.20698	0.0002551
DARS	aspartyl-tRNA synthetase	2.22546	2.01882	0.00392997	0.161003	2.11954	0.0002554
DANCR	differentiation antagonizing non-protein coding RNA	1.97712	2.89043	0.00328391	0.0425461	2.39063	0.0002992
GNL3	G protein nucleolar 3	2.23801	1.77118	0.00697987	0.0401463	1.99084	0.000313
TULP4	tubby like protein 4	2.38463	1.39674	0.00277991	0.115788	1.82515	0.0003559
DDX21	DExD-box helicase 21	2.41925	1.35031	0.0013359	0.0960653	1.80734	0.0003588
ARID3A	AT-rich interaction domain 3A	1.90947	3.05146	0.00107369	0.0595733	2.41371	0.0004378
TANC1	tetratricopeptide repeat, ankyrin repeat and coiled-coil containing 1	1.9846	2.61546	0.017736	0.0940094	2.27842	0.0004529
ITM2A	integral membrane protein 2A	1.76892	5.20217	0.00157599	0.0419536	3.03306	0.000474
S100A12	S100 calcium binding protein A12	1.92619	2.93531	0.0782536	0.124637	2.37756	0.0005552
DIAPH2	diaphanous related formin 2	2.23602	1.52757	0.00365702	0.111028	1.84809	0.0005902
CTH	cystathionine gamma-lyase	2.47987	1.26271	0.0125114	0.323923	1.7696	0.0006228
PPAT	phosphoribosyl pyrophosphate amidotransferase	2.18943	1.63397	0.00193872	0.040532	1.89143	0.0006256
DMXL2	Dmx like 2	1.8894	3.10048	0.00454896	0.0513553	2.42014	0.0006303
FAM175A	family with sequence similarity 175 member A	2.65729	1.1062	0.0113522	0.260114	1.71438	0.0006305
SAMHD1	SAM and HD domain containing deoxynucleoside triphosphate triphosphohydrolase 1	2.08847	1.9012	0.103066	0.0454196	1.99283	0.0006312
PLXDC2	plexin domain containing 2	2.7221	-1.04381	0.0101505	0.873491	1.61499	0.0006535
CCR7	C-C motif chemokine receptor 7	2.21132	1.53117	0.000507546	0.0539663	1.83993	0.0006655
DZIP3	DAZ interacting zinc finger protein 3	2.43129	1.29682	0.0163181	0.10152	1.77557	0.0006937
FAM105A	family with sequence similarity 105 member A	2.29443	1.40392	0.0193325	0.134014	1.79469	0.0007093
SLC25A32	solute carrier family 25 member 32	2.08801	1.89217	0.00435686	0.0483216	1.98768	0.0007128
PRKAR2A	protein kinase cAMP-dependent type II regulatory subunit alpha	2.20964	1.59215	0.00523199	0.0825014	1.87582	0.0007352
WDR3	WD repeat domain 3	2.2611	1.42194	0.00328391	0.0449144	1.79308	0.000739
CLEC7A	C-type lectin domain containing 7A	2.23112	1.49445	0.011713	0.190504	1.82615	0.0007822
MBTPS2	membrane bound transcription factor peptidase, site 2	2.20572	1.53937	0.00503067	0.0436948	1.84264	0.0007861
RSL1D1	ribosomal L1 domain containing 1	2.32965	1.35804	0.00498702	0.0852854	1.77873	0.0007871
VPS33A	VPS33A, CORVET/HOPS core subunit	2.35921	1.26426	0.00224054	0.142922	1.72712	0.0007919
NAMPT	nicotinamide phosphoribosyltransferase	1.92974	2.37764	0.0277249	0.00923569	2.14179	0.0008044
SLC30A10	solute carrier family 30 member 10	2.15538	1.62405	0.0170208	0.253255	1.87091	0.000885
CD109	CD109 molecule	1.77407	3.72263	0.0221315	0.0850467	2.57003	0.0008988
GUF1	GUF1 homolog, GTPase	2.29511	1.44311	0.0263217	0.253454	1.81984	0.0009235
PRMT5	protein arginine methyltransferase 5	1.97153	2.17538	0.00681684	0.0469543	2.07082	0.0009236
MT2A	metallothionein 2A	1.62369	5.92356	0.215094	0.113678	3.10174	0.0009253
OLR1	oxidized low density lipoprotein receptor 1	2.75349	-1.0082	0.0180498	0.877677	1.65262	0.0009423
KBTBD8	kelch repeat and BTB domain containing 8	2.05762	1.77779	0.00240374	0.0315841	1.91241	0.0009728
UTP20	UTP20, small subunit processome component	2.41784	1.2246	0.0114321	0.209764	1.72058	0.0009853
FAM83A	family with sequence similarity 83 member A	2.22579	1.39598	0.00517281	0.28014	1.76274	0.0009942
TKT	transketolase	2.31833	1.34428	0.00169055	0.329075	1.76523	0.001
MDH2	malate dehydrogenase 2	2.09067	1.79112	0.00503067	0.101725	1.93498	0.001004
PHOSPHO1	phosphoethanolamine/phosphocholine phosphatase	2.18729	1.38244	0.00633335	0.380721	1.73883	0.001133
MLLT3	MLLT3, super elongation complex subunit	2.04131	1.82759	0.00155527	0.0673572	1.93162	0.001135
ASUN	asunder spermatogenesis regulator	2.03629	1.82336	0.00829239	0.0692929	1.92678	0.001138
SEH1L	SEH1 like nucleoporin	2.19644	1.42201	0.00552566	0.0354308	1.76741	0.001139
GNPNAT1	glucosamine-phosphate N-acetyltransferase 1	2.02715	1.88699	0.0306448	0.0817359	1.9558	0.001142
ADD3	adducin 3	2.35607	1.22828	0.00208777	0.291863	1.70126	0.001203
LRRC59	leucine rich repeat containing 59	2.0601	1.67857	0.00502805	0.0307844	1.85943	0.001236
LRPPRC	leucine rich pentatricopeptide repeat containing	2.25808	1.3614	0.0059256	0.192505	1.75346	0.001463
DDX10	DEAD-box helicase 10	2.14446	1.31915	0.00454896	0.395149	1.6818	0.001632
APOBEC3C	apolipoprotein B mRNA editing enzyme catalytic subunit 3C	2.24951	1.31872	0.0105961	0.167373	1.72236	0.001646
MRPS28	mitochondrial ribosomal protein S28	1.9912	1.74729	0.00280164	0.0461872	1.86532	0.001714
TUFM	Tu translation elongation factor, mitochondrial	1.99854	1.88667	0.00133452	0.149344	1.94175	0.001721
RRP1B	ribosomal RNA processing 1B	2.00201	1.76893	0.00349965	0.0491065	1.88182	0.001732
WDR12	WD repeat domain 12	2.00688	1.80596	0.00684177	0.0866768	1.90367	0.001746
FAM117B	family with sequence similarity 117 member B	2.19718	1.48602	0.0019363	0.432634	1.80701	0.001754
NUFIP1	NUFIP1, FMR1 interacting protein 1	2.24999	1.27387	0.00504601	0.154176	1.69291	0.001841
C17orf99	chromosome 17 open reading frame 99	1.8181	2.39333	0.00300856	0.167352	2.08594	0.001843
ROBO1	roundabout guidance receptor 1	1.62157	4.64113	0.00794644	0.0166696	2.74348	0.001851
ARHGDIB	Rho GDP dissociation inhibitor beta	1.91467	2.01614	0.0160766	0.0681877	1.96464	0.001946
ACOT9	acyl-CoA thioesterase 9	1.84518	2.26597	0.0110889	0.0425516	2.04457	0.001957
PPA1	pyrophosphatase (inorganic) 1	2.12126	1.52163	0.00610677	0.239088	1.79662	0.002001
TEX9	testis expressed 9	2.41929	1.04559	0.00176617	0.855456	1.59058	0.002022
FBL	fibrillarin	2.22222	1.32563	0.000629088	0.387882	1.71644	0.002064
IARS2	isoleucyl-tRNA synthetase 2, mitochondrial	2.06023	1.72392	0.00575228	0.297221	1.88466	0.002066
BAG3	BCL2 associated athanogene 3	1.68612	3.42666	0.0232682	0.0298593	2.40385	0.002075
GOT2	glutamic-oxaloacetic transaminase 2	2.13373	1.38398	0.00155527	0.22909	1.71851	0.002137
TMEM2	transmembrane protein 2	2.40884	1.0462	0.00205069	0.53109	1.58755	0.002137
CLEC5A	C-type lectin domain containing 5A	2.00777	1.57709	0.122631	0.238884	1.77936	0.002208
PTPRJ	protein tyrosine phosphatase, receptor type J	2.33987	1.09928	0.00119973	0.502008	1.60385	0.002222
MYC	MYC proto-oncogene, bHLH transcription factor	2.10982	1.55245	0.00628086	0.316411	1.80995	0.002234
HSD17B7	hydroxysteroid 17-beta dehydrogenase 7	2.051	1.4873	0.000831829	0.045515	1.74642	0.002236
QPRT	quinolinate phosphoribosyltransferase	2.00562	2.09519	0.00431024	0.369361	2.05002	0.002374
SEC11A	SEC11 homolog A, signal peptidase complex subunit	2.02444	1.55197	0.00218237	0.0741291	1.77242	0.002381
KPNB1	karyopherin subunit beta 1	2.22328	1.21759	0.00215435	0.217277	1.64528	0.00239
NOP16	NOP16 nucleolar protein	1.90957	1.84326	0.0147082	0.0363796	1.87617	0.002408
NAT10	N-acetyltransferase 10	2.15394	1.44323	0.0101873	0.286573	1.76305	0.002432
ACSM3	acyl-CoA synthetase medium chain family member 3	2.059	1.50096	0.0253539	0.0805317	1.75809	0.002496
HRSP12	heat-responsive protein 12	1.9733	1.55391	0.00558967	0.152216	1.75101	0.002503
CENPV	centromere protein V	2.01571	1.5213	0.0110714	0.120629	1.75101	0.002515
ARHGAP18	Rho GTPase activating protein 18	1.87251	2.20017	0.0128109	0.164803	2.02963	0.002517
CTSC	cathepsin C	1.84912	2.13865	0.0234501	0.0616729	1.98847	0.002524
PRDX1	peroxiredoxin 1	1.95363	1.70786	0.00379447	0.0419074	1.82648	0.002524
TTLL4	tubulin tyrosine ligase like 4	2.09541	1.42272	0.000721402	0.121733	1.72652	0.002549
MAK16	MAK16 homolog	2.07051	1.40292	0.0048751	0.0777012	1.70445	0.002597
MANSC1	MANSC domain containing 1	2.03282	1.43705	0.00181934	0.102605	1.70911	0.0026
S100A9	S100 calcium binding protein A9	1.79172	2.76334	0.0181187	0.352218	2.22519	0.002649
GFM1	G elongation factor mitochondrial 1	1.99177	1.54088	0.0108137	0.128177	1.75193	0.002747
ICT1	immature colon carcinoma transcript 1	2.15151	1.27512	0.00387891	0.228135	1.65645	0.00282
FAH	fumarylacetoacetate hydrolase	1.64008	3.44155	0.0277667	0.0469853	2.37586	0.002945
ATIC	5-aminoimidazole-4-carboxamide ribonucleotide formyltransferase/IMP cyclohydrolase	2.21318	1.28021	0.00608555	0.411296	1.68322	0.003003
ABCG2	ATP binding cassette subfamily G member 2 (Junior blood group)	1.72551	2.64518	0.0247004	0.0884182	2.1363	0.003152
CBL	Cbl proto-oncogene	1.85469	1.90801	0.0102465	0.0830701	1.88111	0.003164
MRPS7	mitochondrial ribosomal protein S7	1.92109	1.73585	0.000464664	0.075809	1.82615	0.003189
SLC16A1	solute carrier family 16 member 1	1.57328	4.32702	0.0288306	0.0307844	2.60892	0.003238
CIRH1A	cirrhosis autosomal recessive 1A (cirhin)	2.10091	1.3367	0.00537472	0.0733662	1.67588	0.003473
MNDA	myeloid cell nuclear differentiation antigen	1.92268	2.10675	0.0403048	0.413442	2.01248	0.003508
TARP	TCR gamma alternate reading frame protein	2.16339	1.22579	0.0375477	0.159085	1.6284	0.00353
PDCD11	programmed cell death 11	1.96616	1.60045	0.00275599	0.0838347	1.77399	0.003553
FAM162A	family with sequence similarity 162 member A	1.41404	10.1666	0.0252364	0.0753928	3.79219	0.003573
COL4A5	collagen type IV alpha 5 chain	1.50028	6.02187	0.00456052	0.0201422	3.00571	0.003673
DIMT1	DIM1 dimethyladenosine transferase 1 homolog	2.08784	1.31349	0.00142609	0.218904	1.6559	0.003774
NUS1	NUS1 dehydrodolichyl diphosphate synthase subunit	1.91443	1.6307	0.0089746	0.041965	1.76678	0.003887
MRPL15	mitochondrial ribosomal protein L15	2.00863	1.46954	0.00731096	0.122163	1.71821	0.003888
TIMM50	translocase of inner mitochondrial membrane 50	1.8318	2.01224	0.00274756	0.0997055	1.91975	0.003899
TAF1D	TATA-box binding protein associated factor, RNA polymerase I subunit D	2.25889	1.10515	0.00989066	0.4585	1.58003	0.0039
KCNE3	potassium voltage-gated channel subfamily E regulatory subunit 3	1.72113	2.47746	0.0162359	0.0516069	2.06484	0.004074
TMEM97	transmembrane protein 97	2.06844	1.40209	0.00175468	0.290017	1.703	0.004079
PHGDH	phosphoglycerate dehydrogenase	2.1989	1.0923	0.00253042	0.693598	1.54991	0.004098
LYAR	Ly1 antibody reactive	1.90244	1.68473	0.0213841	0.10517	1.79019	0.004112
SDAD1	SDA1 domain containing 1	2.09313	1.26778	0.010913	0.132229	1.62893	0.004192
TREML2	triggering receptor expressed on myeloid cells like 2	1.92186	1.54936	0.0031459	0.0934577	1.72563	0.004232
ME2	malic enzyme 2	1.9244	1.64498	0.022853	0.17958	1.77936	0.004263
SRM	spermidine synthase	1.83876	1.84514	0.0268266	0.100907	1.84196	0.004282
TOMM5	translocase of outer mitochondrial membrane 5	1.7131	2.35134	0.00348331	0.0335826	2.00682	0.004437
TMEM33	transmembrane protein 33	1.96828	1.45951	0.0130793	0.130291	1.69492	0.004549
PUS7	pseudouridylate synthase 7 (putative)	1.89753	1.6874	0.0241448	0.104624	1.78923	0.004595
EFTUD2	elongation factor Tu GTP binding domain containing 2	2.0622	1.34475	0.00499861	0.134592	1.66528	0.004595
GTF3A	general transcription factor IIIA	1.9229	1.57028	0.00296696	0.0965506	1.73762	0.004728
OBSCN	obscurin, cytoskeletal calmodulin and titin-interacting RhoGEF	1.9134	1.51532	0.0172863	0.0692929	1.70271	0.004754
FAR2	fatty acyl-CoA reductase 2	1.73705	2.17485	0.00782821	0.0557175	1.94363	0.004776
APP	amyloid beta precursor protein	1.98258	1.50341	0.0165292	0.307516	1.72652	0.004882
SORT1	sortilin 1	1.87888	1.66958	0.00662948	0.054083	1.77117	0.004916
H19	H19, imprinted maternally expressed transcript (non-protein coding)	-1.10717	191.383	0.455296	0.00923569	13.1475	0.004936
SPTSSA	serine palmitoyltransferase small subunit A	1.79644	1.89479	0.00479975	0.0261047	1.84502	0.005007
GYG1	glycogenin 1	1.73769	2.10774	0.017975	0.0166696	1.91388	0.005008
TSR1	TSR1, ribosome maturation factor	1.8814	1.61935	0.00940028	0.0657766	1.74551	0.005048
TFAM	transcription factor A, mitochondrial	1.8338	1.76214	0.0029373	0.106257	1.79759	0.005066
GSR	glutathione-disulfide reductase	2.15115	1.14948	0.00177315	0.336712	1.57257	0.005142
ACLY	ATP citrate lyase	1.93221	1.57465	0.00374274	0.155534	1.74429	0.005151
GOPC	golgi associated PDZ and coiled-coil motif containing	2.19265	1.11438	0.00592168	0.327063	1.56323	0.005155
ATP8B2	ATPase phospholipid transporting 8B2	1.59573	3.68024	0.00325937	0.0798376	2.42307	0.00517
LYPLA1	lysophospholipase I	1.6383	2.90898	0.00767741	0.0584398	2.18293	0.005264
UTP15	UTP15, small subunit processome component	2.209	1.08537	0.00435548	0.41194	1.54847	0.005267
ZBTB34	zinc finger and BTB domain containing 34	1.54872	3.70451	0.018751	0.0306466	2.39521	0.00527
PNPT1	polyribonucleotide nucleotidyltransferase 1	1.99503	1.36457	0.0106088	0.144963	1.64989	0.005271
GTPBP4	GTP binding protein 4	1.97212	1.45201	0.0180766	0.0623367	1.69233	0.005281
TOMM40	translocase of outer mitochondrial membrane 40	1.96787	1.43223	0.00537472	0.111459	1.6787	0.005314
GSTP1	glutathione S-transferase pi 1	1.6543	2.68159	0.00637593	0.0223491	2.10615	0.005336
LTV1	LTV1 ribosome biogenesis factor	2.06323	1.28613	0.0185868	0.119134	1.62893	0.005336
TBC1D12	TBC1 domain family member 12	1.59358	3.11987	0.0385995	0.0286505	2.22965	0.005338
PNO1	partner of NOB1 homolog	2.05385	1.27206	0.00225866	0.361069	1.61629	0.005365
GPATCH4	G-patch domain containing 4	1.74751	2.03903	0.00445984	0.0332972	1.8875	0.005368
FCER1G	Fc fragment of IgE receptor Ig	1.97811	1.41506	0.0644578	0.48323	1.67308	0.005384
PEBP1	phosphatidylethanolamine binding protein 1	1.76463	1.99622	0.0184467	0.090878	1.87688	0.005427
HMGCS1	3-hydroxy-3-methylglutaryl-CoA synthase 1	1.83175	1.83176	0.0155205	0.153785	1.83184	0.005442
HDHD2	haloacid dehalogenase like hydrolase domain containing 2	2.15898	1.10569	0.000721761	0.171769	1.54512	0.005447
EIF2S3	eukaryotic translation initiation factor 2 subunit gamma	1.55096	3.47377	0.0346407	0.0495523	2.32126	0.005452
PDCD5	programmed cell death 5	1.92411	1.50351	0.00193872	0.133683	1.70097	0.005459
ABCE1	ATP binding cassette subfamily E member 1	2.1449	1.16088	0.0127457	0.239987	1.57803	0.005467
VDAC1	voltage dependent anion channel 1	1.76025	2.04524	0.0167549	0.131943	1.89753	0.006017
ABAT	4-aminobutyrate aminotransferase	1.71451	2.16672	0.00192738	0.0332972	1.92753	0.006072
NT5DC2	5'-nucleotidase domain containing 2	1.67946	2.28921	0.0025027	0.0364173	1.96078	0.006079
THEM4	thioesterase superfamily member 4	1.79142	1.77912	0.0100741	0.0309587	1.7854	0.006212
TNPO1	transportin 1	2.07761	1.25367	0.00798274	0.270514	1.61394	0.006221
PDK1	pyruvate dehydrogenase kinase 1	1.63366	2.92572	0.0124553	0.182499	2.18627	0.006226
AHCY	adenosylhomocysteinase	1.67132	2.69907	0.0168432	0.168405	2.12404	0.006469
MRPL35	mitochondrial ribosomal protein L35	1.87109	1.53646	0.00684177	0.0705335	1.69549	0.006475
BMS1	BMS1, ribosome biogenesis factor	2.14595	1.11275	0.00628086	0.227469	1.54536	0.006486
SMIM13	small integral membrane protein 13	1.82357	1.69494	0.00155527	0.0400451	1.75809	0.006492
ALG1	ALG1, chitobiosyldiphosphodolichol beta-mannosyltransferase	1.88821	1.51082	0.00828967	0.0426745	1.6889	0.006498
MRTO4	MRT4 homolog, ribosome maturation factor	1.83537	1.64416	0.0155911	0.0354115	1.73702	0.006509
WDR36	WD repeat domain 36	2.14772	1.1067	0.00778411	0.177917	1.54178	0.006523
MRPS15	mitochondrial ribosomal protein S15	1.80972	1.83797	0.00701229	0.155688	1.82382	0.006552
EIF5B	eukaryotic translation initiation factor 5B	1.92106	1.40766	0.103698	0.106319	1.64447	0.006552
UBE2E2	ubiquitin conjugating enzyme E2 E2	1.43382	4.93082	0.079511	0.0107166	2.65887	0.006557
SLC2A3	solute carrier family 2 member 3	1.2878	9.80891	0.25492	0.0613506	3.55366	0.006559
HIGD2A	HIG1 hypoxia inducible domain family member 2A	1.85381	1.48521	0.000721761	0.0944143	1.6592	0.006567
EPB41L5	erythrocyte membrane protein band 4.1 like 5	1.75052	1.80044	0.0396877	0.017472	1.77525	0.006592
ZCCHC17	zinc finger CCHC-type containing 17	1.79571	1.73852	0.00649186	0.0405513	1.76678	0.006684
DHCR24	24-dehydrocholesterol reductase	1.71191	2.14412	0.0586508	0.115126	1.91571	0.00669
ATP2A2	ATPase sarcoplasmic/endoplasmic reticulum Ca2+ transporting 2	1.91024	1.42553	0.00325463	0.0419074	1.65017	0.006784
PPIL1	peptidylprolyl isomerase like 1	1.92013	1.45479	0.0174158	0.149878	1.6714	0.006859
MRPS23	mitochondrial ribosomal protein S23	1.74785	1.93553	0.00503067	0.0907147	1.83925	0.007002
DHRS11	dehydrogenase/reductase 11	1.75158	1.8647	0.00486049	0.114952	1.80734	0.007005
ALDH1B1	aldehyde dehydrogenase 1 family member B1	1.7556	1.78121	0.0115432	0.111704	1.76835	0.007031
TET1	tet methylcytosine dioxygenase 1	1.48748	4.47575	0.0177423	0.0626306	2.57998	0.007043
SLC38A5	solute carrier family 38 member 5	1.92525	1.38241	0.000492165	0.22911	1.63132	0.007089
ARCN1	archain 1	2.0184	1.22751	0.0017951	0.132618	1.57406	0.007325
MBTPS1	membrane bound transcription factor peptidase, site 1	2.02685	1.22993	0.00277991	0.0596386	1.57878	0.007386
ERAL1	Era like 12S mitochondrial rRNA chaperone 1	1.61806	2.56701	0.0289059	0.0585749	2.03791	0.007702
SCD	stearoyl-CoA desaturase	1.93868	1.32914	0.120974	0.0715549	1.60514	0.00779
PFN1	profilin 1	1.73297	1.86923	0.00906091	0.0460169	1.79986	0.007807
OGFOD1	2-oxoglutarate and iron dependent oxygenase domain containing 1	1.92325	1.36613	0.0119047	0.0867303	1.62101	0.007823
RTCB	RNA 2',3'-cyclic phosphate and 5'-OH ligase	2.02807	1.21624	0.000626922	0.16976	1.5706	0.007835
SYNCRIP	synaptotagmin binding cytoplasmic RNA interacting protein	1.65852	2.17187	0.033335	0.0306466	1.89789	0.007839
SNAP23	synaptosome associated protein 23	1.79293	1.52685	0.0140457	0.162541	1.65453	0.007842
RPAP3	RNA polymerase II associated protein 3	1.97358	1.27393	0.0300184	0.038942	1.58554	0.008124
ACTR2	ARP2 actin related protein 2 homolog	1.87462	1.34682	0.0142558	0.201493	1.58907	0.008411
EIF3M	eukaryotic translation initiation factor 3 subunit M	1.86387	1.46845	0.000692673	0.0638807	1.65426	0.008415
SNX5	sorting nexin 5	1.60409	2.4526	0.00523199	0.0469543	1.98334	0.008445
RNASE6	ribonuclease A family member k6	1.92148	1.38108	0.0867991	0.353067	1.62893	0.008605
SFXN2	sideroflexin 2	1.89582	1.43816	0.0449377	0.0830494	1.65125	0.008627
ADCY7	adenylate cyclase 7	1.6972	2.03478	0.0057094	0.0715103	1.85839	0.008634
HSPA4	heat shock protein family A (Hsp70) member 4	1.81523	1.56719	0.0174399	0.0633507	1.68663	0.00872
NT5C2	5'-nucleotidase, cytosolic II	2.03502	1.15257	0.00223034	0.411087	1.53139	0.008722
ESF1	ESF1 nucleolar pre-rRNA processing protein homolog	1.87982	1.41878	0.0945279	0.0495353	1.63319	0.008742
STAT3	signal transducer and activator of transcription 3	2.02655	1.2289	0.0117612	0.432602	1.57803	0.008752
EBNA1BP2	EBNA1 binding protein 2	1.79372	1.61722	0.00311035	0.0871342	1.70329	0.008771
GBE1	1,4-alpha-glucan branching enzyme 1	1.52115	3.35374	0.0241884	0.0781586	2.25887	0.008779
TMEM69	transmembrane protein 69	1.84783	1.48252	0.00112967	0.0287895	1.65508	0.008785
METAP1	methionyl aminopeptidase 1	1.89153	1.42135	0.00843988	0.142689	1.63961	0.009028
CORO1C	coronin 1C	1.66958	2.14121	0.00861695	0.0784872	1.89072	0.009047
NOP14	NOP14 nucleolar protein	1.99105	1.21754	0.00457777	0.270514	1.5569	0.009156
FH	fumarate hydratase	1.84125	1.52674	0.00553902	0.157406	1.67673	0.009171
MCCC2	methylcrotonoyl-CoA carboxylase 2	1.62394	2.34837	0.0530993	0.0848144	1.95274	0.009177
ALG8	ALG8, alpha-1,3-glucosyltransferase	1.70656	1.94614	0.0340332	0.0893564	1.82249	0.009197
PAICS	phosphoribosylaminoimidazole carboxylase and phosphoribosylaminoimidazolesuccinocarboxamide synthase	1.7795	1.71556	0.0300847	0.131842	1.74734	0.009219
GRB2	growth factor receptor bound protein 2	1.90469	1.35704	0.00214126	0.105492	1.60772	0.009522
RPS23	ribosomal protein S23	1.53692	2.94275	0.0113683	0.0348038	2.12675	0.009535
UBA5	ubiquitin like modifier activating enzyme 5	1.77477	1.65971	0.0199312	0.0969004	1.71615	0.009861
TUBGCP2	tubulin gamma complex associated protein 2	1.85421	1.41051	0.00345596	0.0449494	1.61734	0.009955
GTPBP8	GTP binding protein 8 (putative)	1.77929	1.56905	0.0168455	0.0530106	1.67084	0.009975
EIF3I	eukaryotic translation initiation factor 3 subunit I	1.96517	1.24876	0.00349229	0.0681276	1.56642	0.01003
PFAS	phosphoribosylformylglycinamidine synthase	1.8187	1.53495	0.00762463	0.0873702	1.67084	0.01007
TRMT6	tRNA methyltransferase 6	1.91484	1.32542	0.00188906	0.396168	1.59312	0.01008
SKIL	SKI like proto-oncogene	2.09169	1.08063	0.023447	0.481771	1.50353	0.01008
PPIB	peptidylprolyl isomerase B	1.59883	2.42236	0.017178	0.0429648	1.96812	0.01009
MARCH3	membrane associated ring-CH-type finger 3	1.59499	2.27585	0.0405612	0.298913	1.90512	0.01023
CITED2	Cbp/p300 interacting transactivator with Glu/Asp rich carboxy-terminal domain 2	1.84791	1.43748	0.00200524	0.0426745	1.62973	0.0103
RHOBTB3	Rho related BTB domain containing 3	1.79303	1.70947	0.00947796	0.216412	1.7507	0.01055
ANXA2P2	annexin A2 pseudogene 2	1.80388	1.46859	0.0590777	0.0878363	1.6276	0.01058
ALDOA	aldolase, fructose-bisphosphate A	1.55292	3.6583	0.0218915	0.293655	2.38322	0.01059
NAA15	N(alpha)-acetyltransferase 15, NatA auxiliary subunit	1.97324	1.22343	0.0216227	0.132239	1.55376	0.01076
DOCK2	dedicator of cytokinesis 2	1.56596	2.41056	0.101997	0.0807183	1.94288	0.01077
UCA1	urothelial cancer associated 1 (non-protein coding)	1.85755	1.24286	0.256375	0.789974	1.51953	0.01077
SERPINB1	serpin family B member 1	1.73415	1.75118	0.00548057	0.11908	1.74277	0.01079
MAGEF1	MAGE family member F1	1.54825	2.73811	0.0289926	0.0584398	2.05888	0.01086
TRAPPC2L	trafficking protein particle complex 2 like	1.62956	2.19253	0.0265259	0.0937368	1.89036	0.01092
VIM	vimentin	1.60644	2.36836	0.0883656	0.231883	1.95046	0.01103
SMYD2	SET and MYND domain containing 2	1.60644	2.30625	0.0067547	0.104341	1.92493	0.01158
RABGGTB	Rab geranylgeranyltransferase beta subunit	1.78815	1.58259	0.00674876	0.179886	1.68237	0.01171
RPN2	ribophorin II	1.8427	1.4337	0.014747	0.142224	1.62549	0.01186
PKLR	pyruvate kinase L/R	1.90437	1.35355	0.00298718	0.263047	1.60539	0.01186
ITGA5	integrin subunit alpha 5	1.97654	1.19694	0.000222695	0.0809427	1.53822	0.01186
INVS	inversin	1.68395	1.9753	0.00665246	0.153196	1.82382	0.01187
SNRPD1	small nuclear ribonucleoprotein D1 polypeptide	1.89919	1.33701	0.00403687	0.235857	1.59337	0.01187
DIS3	DIS3 homolog, exosome endoribonuclease and 3'-5' exoribonuclease	1.84571	1.39048	0.00306389	0.0556302	1.60205	0.01188
BRWD3	bromodomain and WD repeat domain containing 3	1.91702	1.24062	0.0209297	0.233693	1.54226	0.01191
MST4	serine/threonine protein kinase MST4	1.69468	1.69655	0.00677165	0.0514361	1.69549	0.01231
NSUN2	NOP2/Sun RNA methyltransferase family member 2	2.00235	1.1527	0.00328391	0.285177	1.5193	0.01239
STARD7	StAR related lipid transfer domain containing 7	2.01683	1.15033	0.00570064	0.346974	1.52323	0.01239
IMPDH2	inosine monophosphate dehydrogenase 2	1.9558	1.30348	0.0123071	0.42088	1.59668	0.01243
UTP11L	UTP11-like U3 small nucleolar ribonucleoprotein (yeast)	1.88268	1.32143	0.00739523	0.0963241	1.57729	0.01265
HPGD	15-hydroxyprostaglandin dehydrogenase	1.04229	26.169	0.832596	0.00923569	5.22193	0.01269
LOX	lysyl oxidase	-1.06672	58.62	0.676914	0.0348038	7.4129	0.01271
FAM103A1	family with sequence similarity 103 member A1	1.95942	1.18796	0.00474601	0.0860389	1.52579	0.01276
TSPAN3	tetraspanin 3	1.72529	1.68736	0.00699664	0.038942	1.70619	0.01278
CHD4	chromodomain helicase DNA binding protein 4	1.89944	1.30567	0.00281304	0.141789	1.5748	0.01287
QRSL1	glutaminyl-tRNA synthase (glutamine-hydrolyzing)-like 1	1.94484	1.17772	0.00486049	0.269564	1.51355	0.01315
PDE3B	phosphodiesterase 3B	2.01407	1.12813	0.00473636	0.388781	1.50739	0.01322
DNAJA2	DnaJ heat shock protein family (Hsp40) member A2	1.91188	1.25776	0.000575138	0.192505	1.55063	0.01353
DHPS	deoxyhypusine synthase	1.79708	1.5161	0.00238874	0.107527	1.65071	0.01357
PSMB2	proteasome subunit beta 2	1.75429	1.57071	0.00170195	0.0696229	1.66003	0.01376
TMED8	transmembrane p24 trafficking protein family member 8	1.77927	1.49502	0.00379447	0.0574428	1.63106	0.01377
PBDC1	polysaccharide biosynthesis domain containing 1	1.71235	1.64692	0.0698944	0.0438649	1.67926	0.01378
DHX36	DEAH-box helicase 36	1.84476	1.31811	0.0491332	0.0526563	1.55933	0.01411
STARD3NL	STARD3 N-terminal like	1.7581	1.56979	0.00486049	0.0723562	1.66141	0.01421
APOOL	apolipoprotein O like	1.55757	2.39398	0.00293658	0.0161028	1.93087	0.01423
ALDOC	aldolase, fructose-bisphosphate C	1.48642	3.67879	0.147752	0.297461	2.33863	0.0148
FOCAD	focadhesin	1.83461	1.4013	0.00225118	0.164603	1.60333	0.0148
LRRC47	leucine rich repeat containing 47	1.9284	1.21853	0.00144262	0.180206	1.5328	0.01484
ACN9	ACN9 homolog (S. cerevisiae)	1.67928	1.77187	0.00808131	0.0715872	1.72503	0.01488
PSME3	proteasome activator subunit 3	1.85426	1.31653	0.00232737	0.111638	1.5625	0.01494
NAIP	NLR family apoptosis inhibitory protein	1.87006	1.28403	0.0174648	0.133683	1.54967	0.01495
LDHB	lactate dehydrogenase B	1.86761	1.36243	0.0138189	0.254643	1.59515	0.01496
SPRED1	sprouty related EVH1 domain containing 1	1.37921	4.19565	0.0711413	0.0309587	2.40558	0.01497
APOA1BP	apolipoprotein A-I binding protein	1.77143	1.57967	0.00793102	0.219348	1.6728	0.01497
CDC123	cell division cycle 123	1.82721	1.36874	0.00654458	0.244726	1.58153	0.01497
E2F3	E2F transcription factor 3	1.6249	1.97898	0.00769459	0.0462965	1.79308	0.01502
DPP3	dipeptidyl peptidase 3	1.70315	1.64247	0.00425651	0.0340765	1.67252	0.01503
SKP2	S-phase kinase associated protein 2	1.66712	1.78095	0.013714	0.0478957	1.72295	0.01504
HCLS1	hematopoietic cell-specific Lyn substrate 1	1.63335	2.01743	0.0681134	0.196377	1.81521	0.01506
MMP14	matrix metallopeptidase 14	1.85691	1.27477	0.00663941	0.0657766	1.53846	0.01563
LINC00657	long intergenic non-protein coding RNA 657	1.8397	1.3482	0.00511841	0.145545	1.5748	0.01564
FPR1	formyl peptide receptor 1	1.76279	1.42324	0.0885908	0.238597	1.58403	0.01585
MNS1	meiosis specific nuclear structural 1	1.92804	1.23722	0.017975	0.395308	1.5444	0.01589
ELF1	E74 like ETS transcription factor 1	1.75186	1.47746	0.00462269	0.0552973	1.60875	0.01603
CD53	CD53 molecule	1.79651	1.39667	0.0984403	0.178188	1.58403	0.0162
GEMIN5	gem nuclear organelle associated protein 5	1.7062	1.65314	0.0102627	0.0851852	1.67954	0.01636
AGPAT5	1-acylglycerol-3-phosphate O-acyltransferase 5	1.74671	1.68644	0.0188781	0.35663	1.71644	0.01661
DICER1	dicer 1, ribonuclease III	1.73184	1.53104	0.00797938	0.0712962	1.6284	0.01679
MPI	mannose phosphate isomerase	1.61062	2.09918	0.00662974	0.120468	1.83857	0.01692
POLR3B	RNA polymerase III subunit B	1.76683	1.41879	0.00584316	0.126598	1.58328	0.01699
KNOP1	lysine rich nucleolar protein 1	1.84263	1.31359	0.00430938	0.139712	1.55569	0.01701
AKIRIN1	akirin 1	1.76491	1.41023	0.0116256	0.420767	1.57754	0.01767
SERPINB6	serpin family B member 6	1.52966	2.3432	0.013059	0.0201422	1.89322	0.01772
PWP1	PWP1 homolog, endonuclein	1.71043	1.59132	0.0143708	0.0824316	1.64989	0.01773
STAP1	signal transducing adaptor family member 1	1.12563	7.1952	0.782506	0.0377148	2.84576	0.01774
ATP1B1	ATPase Na+/K+ transporting subunit beta 1	1.84862	1.2509	0.00502805	0.190503	1.52068	0.01777
FAM98A	family with sequence similarity 98 member A	1.9145	1.18561	0.00202639	0.211296	1.5067	0.01778
ACAA2	acetyl-CoA acyltransferase 2	1.6655	1.66517	0.0888861	0.0314704	1.66528	0.0178
HSP90AB1	heat shock protein 90 alpha family class B member 1	1.72313	1.58248	0.00471774	0.0722055	1.65125	0.01781
DDX18	DEAD-box helicase 18	1.86644	1.24326	0.00955961	0.0610421	1.52323	0.01781
BCCIP	BRCA2 and CDKN1A interacting protein	1.70222	1.58387	0.0310274	0.0650291	1.64204	0.01784
PNKD	paroxysmal nonkinesigenic dyskinesia	1.25406	7.16017	0.0500624	0.0182718	2.9967	0.01786
CCDC43	coiled-coil domain containing 43	1.90399	1.23226	0.00241262	0.359208	1.53163	0.01826
DAD1	defender against cell death 1	1.56551	2.13783	0.00939148	0.041489	1.82949	0.01833
USP10	ubiquitin specific peptidase 10	1.8733	1.1944	0.00301672	0.384252	1.49589	0.01839
C2orf47	chromosome 2 open reading frame 47	1.78757	1.37532	0.00469187	0.0655015	1.56789	0.0184
GRPEL1	GrpE like 1, mitochondrial	1.63069	1.87524	0.00582434	0.0630933	1.74856	0.01842
TLR8	toll like receptor 8	1.79761	1.38153	0.00702959	0.33122	1.5758	0.01865
PCGF5	polycomb group ring finger 5	1.79223	1.34823	0.0104181	0.0918371	1.55448	0.01867
SLC25A33	solute carrier family 25 member 33	1.65871	1.67925	0.0128128	0.0594683	1.66889	0.01872
EIF3G	eukaryotic translation initiation factor 3 subunit G	1.83831	1.31679	0.00362073	0.232459	1.55594	0.01874
RCHY1	ring finger and CHY zinc finger domain containing 1	1.65684	1.77761	0.00903118	0.159445	1.71615	0.01898
UCHL3	ubiquitin C-terminal hydrolase L3	1.80393	1.33857	0.00897742	0.263047	1.554	0.01899
INTS9	integrator complex subunit 9	1.88702	1.21278	0.0056554	0.241566	1.51286	0.01904
RANGRF	RAN guanine nucleotide release factor	1.46816	2.73742	0.0532101	0.0614519	2.00481	0.01912
ITGAV	integrin subunit alpha V	1.74472	1.48094	0.00322989	0.21641	1.60746	0.01931
RUNX1T1	RUNX1 translocation partner 1	1.5745	1.9561	0.103774	0.101991	1.755	0.01961
PSMC4	proteasome 26S subunit, ATPase 4	1.85281	1.24516	0.00108696	0.118257	1.51883	0.01965
POLR1B	RNA polymerase I subunit B	1.64631	1.78354	0.00673118	0.0688793	1.7135	0.0197
ZSWIM7	zinc finger SWIM-type containing 7	1.71664	1.47336	0.0122084	0.106257	1.59033	0.01972
TNIK	TRAF2 and NCK interacting kinase	1.34022	4.58895	0.0886547	0.0549673	2.48016	0.01974
TBK1	TANK binding kinase 1	1.76588	1.37141	0.0113882	0.0813129	1.55618	0.01977
CTSG	cathepsin G	1.65077	1.73269	0.00767741	0.178059	1.69119	0.01978
MRPS35	mitochondrial ribosomal protein S35	1.81756	1.33617	0.00834212	0.315979	1.55836	0.01996
PNMT	phenylethanolamine N-methyltransferase	1.43026	3.0117	0.0273079	0.0442851	2.07555	0.01998
PRKCA	protein kinase C alpha	1.56678	1.98458	0.0125352	0.0447379	1.76336	0.02
NSMAF	neutral sphingomyelinase activation associated factor	1.57209	1.99081	0.0343417	0.0564709	1.76897	0.02003
RRS1	ribosome biogenesis regulator homolog	1.73329	1.44418	0.00486049	0.051327	1.58203	0.02005
TXN	thioredoxin	1.55768	2.15152	0.0111715	0.094271	1.83083	0.02032
IQGAP1	IQ motif containing GTPase activating protein 1	1.67938	1.56762	0.0599555	0.183149	1.62259	0.02033
PDCD4	programmed cell death 4	1.62231	1.91514	0.0393149	0.329075	1.76274	0.02034
AGTPBP1	ATP/GTP binding protein 1	1.73938	1.41023	0.0726993	0.112861	1.56617	0.02036
RIOK1	RIO kinase 1	1.78942	1.29367	0.0294347	0.0776712	1.52138	0.02037
COX6A1	cytochrome c oxidase subunit 6A1	1.81596	1.30813	0.0013956	0.131725	1.54131	0.02041
TUBD1	tubulin delta 1	1.80621	1.2969	0.0102627	0.199873	1.53046	0.02041
FAM49B	family with sequence similarity 49 member B	1.73718	1.4078	0.00682798	0.140383	1.56372	0.02043
EIF1AX	eukaryotic translation initiation factor 1A, X-linked	1.76423	1.37558	0.00987783	0.0695281	1.55788	0.02048
C15orf41	#N/A	1.84377	1.21889	0.0273079	0.100108	1.49903	0.02049
CNRIP1	cannabinoid receptor interacting protein 1	1.77652	1.47282	0.015981	0.407782	1.6176	0.02068
NFIL3	nuclear factor, interleukin 3 regulated	1.32025	4.32276	0.151551	0.031715	2.38892	0.02094
ZNF330	zinc finger protein 330	1.6881	1.5463	0.0382806	0.0898274	1.61577	0.02094
TSPAN6	tetraspanin 6	1.49439	2.4108	0.0170176	0.0901737	1.89825	0.02096
PHB	prohibitin	1.55533	2.11935	0.0164619	0.0963241	1.81554	0.02097
C11orf96	chromosome 11 open reading frame 96	1.02369	18.2968	0.909686	0.00634758	4.32713	0.02105
HS2ST1	heparan sulfate 2-O-sulfotransferase 1	1.77594	1.41418	0.017975	0.520481	1.58479	0.02106
CANX	calnexin	1.70154	1.47387	0.0144171	0.15666	1.58353	0.02113
FAM102B	family with sequence similarity 102 member B	1.75189	1.71909	0.0165811	0.446763	1.73551	0.02117
SFXN4	sideroflexin 4	1.58336	1.90181	0.0487331	0.113593	1.73521	0.0212
SLC39A6	solute carrier family 39 member 6	1.72438	1.42813	0.0282941	0.0501155	1.56937	0.02131
TRUB2	TruB pseudouridine synthase family member 2	1.65404	1.66069	0.00829239	0.0547873	1.65728	0.02133
NOP2	NOP2 nucleolar protein	1.77883	1.33834	0.0104927	0.195812	1.54297	0.02163
C19orf10	chromosome 19 open reading frame 10	1.74989	1.37184	0.00985778	0.0650291	1.54943	0.02169
HOMER1	homer scaffolding protein 1	1.43351	2.76525	0.0275568	0.00923569	1.99084	0.02172
PLAGL1	PLAG1 like zinc finger 1	1.55923	2.23578	0.00883174	0.136932	1.86706	0.02173
WARS2	tryptophanyl tRNA synthetase 2, mitochondrial	1.70441	1.49332	0.00946298	0.0686493	1.59541	0.02207
MAVS	mitochondrial antiviral signaling protein	1.37012	3.73684	0.0338321	0.02673	2.26296	0.02211
SRFBP1	serum response factor binding protein 1	1.80121	1.30995	0.0858352	0.0495523	1.5361	0.02214
BCKDHB	branched chain keto acid dehydrogenase E1 subunit beta	1.57167	2.10433	0.010454	0.130333	1.81851	0.02217
KIAA0020	NA	1.78882	1.29928	0.00637982	0.049978	1.52462	0.02224
SNRPC	small nuclear ribonucleoprotein polypeptide C	1.76373	1.3715	0.00906	0.178894	1.55521	0.02234
SP110	SP110 nuclear body protein	1.8758	1.20266	0.00616974	0.421867	1.50195	0.02237
BIN2	bridging integrator 2	1.48201	2.27625	0.0550928	0.0449144	1.83655	0.02279
ZDHHC16	zinc finger DHHC-type containing 16	1.68932	1.52204	0.00676645	0.0424429	1.60359	0.02279
HMGN3	high mobility group nucleosomal binding domain 3	1.57482	1.95859	0.0355239	0.112661	1.75623	0.02283
PRPF19	pre-mRNA processing factor 19	1.75253	1.35852	0.00975993	0.100885	1.54297	0.02301
SORD	sorbitol dehydrogenase	1.42379	3.08769	0.0297996	0.0753995	2.09688	0.02308
LINC00467	long intergenic non-protein coding RNA 467	1.63238	1.65071	0.00608555	0.0291231	1.6415	0.02312
NOL10	nucleolar protein 10	1.80095	1.26296	0.00502805	0.0582294	1.50807	0.02322
GPHN	gephyrin	1.74141	1.41854	0.00857606	0.134889	1.57159	0.02351
NDUFA9	NADH:ubiquinone oxidoreductase subunit A9	1.80431	1.28722	0.00486911	0.263047	1.52393	0.02355
NOL7	nucleolar protein 7	1.7491	1.34851	0.00839762	0.111638	1.53586	0.02359
TWISTNB	TWIST neighbor	1.69298	1.49751	0.00797607	0.108951	1.59236	0.02361
OXA1L	OXA1L, mitochondrial inner membrane protein	1.66141	1.59591	0.00845884	0.0853611	1.6284	0.02363
FAM213A	family with sequence similarity 213 member A	1.45484	2.55017	0.0118536	0.0306466	1.92604	0.02365
LOC90784	Uncharacterized LOC90784	1.61651	1.67225	0.0226762	0.0400451	1.6442	0.02369
MRPL16	mitochondrial ribosomal protein L16	1.70048	1.48428	0.00829239	0.0855025	1.58881	0.02383
RUVBL2	RuvB like AAA ATPase 2	1.67089	1.60177	0.023346	0.172323	1.63586	0.0242
ACTR6	ARP6 actin related protein 6 homolog	1.77956	1.35273	0.00488109	0.287771	1.55159	0.02439
FAM210A	family with sequence similarity 210 member A	1.50526	2.08853	0.0150498	0.0723675	1.77305	0.02449
EGR1	early growth response 1	1.0645	12.3351	0.771648	0.0430033	3.62319	0.02459
FCN1	ficolin 1	1.41353	2.8253	0.137207	0.145545	1.9984	0.0246
PES1	pescadillo ribosomal biogenesis factor 1	1.64446	1.6085	0.0183674	0.0755265	1.62628	0.02461
DERL1	derlin 1	1.67194	1.5632	0.00206566	0.0599086	1.61655	0.02469
TTC27	tetratricopeptide repeat domain 27	1.71164	1.43883	0.0231483	0.101626	1.56937	0.02472
NXF3	nuclear RNA export factor 3	1.75726	1.29889	0.0798935	0.236462	1.5108	0.0248
HEATR1	HEAT repeat containing 1	1.76142	1.32046	0.0136538	0.047322	1.52509	0.02481
MRPL2	mitochondrial ribosomal protein L2	1.77857	1.30855	0.00684177	0.286573	1.52555	0.02481
PPIF	peptidylprolyl isomerase F	1.6933	1.45425	0.0175186	0.0657766	1.56912	0.02482
SLC35B4	solute carrier family 35 member B4	1.71179	1.43935	0.00663941	0.112741	1.56961	0.02484
EI24	EI24, autophagy associated transmembrane protein	1.56463	1.84267	0.00638978	0.096747	1.69808	0.02517
MRM1	mitochondrial rRNA methyltransferase 1	1.7161	1.40383	0.00280496	0.0852654	1.55207	0.02517
STAT5A	signal transducer and activator of transcription 5A	1.5275	2.00027	0.0528888	0.067123	1.74795	0.02523
MRPL11	mitochondrial ribosomal protein L11	1.66466	1.61252	0.00698766	0.142295	1.63827	0.02531
DNMBP	dynamin binding protein	1.52806	2.05381	0.0151811	0.045393	1.77148	0.02592
TBC1D4	TBC1 domain family member 4	1.15262	8.47504	0.398801	0.0363796	3.125	0.02594
PTPLAD1	protein tyrosine phosphatase-like A domain containing 1	1.69376	1.42648	0.00964226	0.126057	1.55448	0.02599
GSTO1	glutathione S-transferase omega 1	1.53382	1.93338	0.014747	0.0327755	1.72206	0.02609
C14orf2	chromosome 14 open reading frame 2	1.64177	1.55317	0.003579	0.0453562	1.59693	0.02638
SLIRP	SRA stem-loop interacting RNA binding protein	1.62989	1.60805	0.00235321	0.114557	1.61891	0.02641
TYW3	tRNA-yW synthesizing protein 3 homolog	1.72668	1.4035	0.00946384	0.231003	1.55666	0.02649
KDELC1	KDEL motif containing 1	1.73917	1.35412	0.0297452	0.313054	1.53468	0.02697
TSPAN32	tetraspanin 32	1.4436	2.44165	0.0238535	0.0149133	1.87758	0.02698
ACO2	aconitase 2	1.68671	1.45652	0.00192738	0.07588	1.5674	0.02699
PGGT1B	protein geranylgeranyltransferase type I subunit beta	1.63156	1.54171	0.0303761	0.295868	1.58604	0.02702
EXOSC3	exosome component 3	1.58028	1.70072	0.0264543	0.02673	1.63934	0.02778
TAGLN2	transgelin 2	1.4114	2.94439	0.0408315	0.0779171	2.03874	0.02794
CLUH	clustered mitochondria homolog	1.68827	1.41112	0.0340767	0.076932	1.54345	0.02795
NDUFAF1	NADH:ubiquinone oxidoreductase complex assembly factor 1	1.71168	1.38223	0.0299896	0.0868986	1.53822	0.02862
TIMP3	TIMP metallopeptidase inhibitor 3	1.26115	4.40268	0.278853	0.0166696	2.35627	0.02866
ALAS1	5'-aminolevulinate synthase 1	1.35407	3.00783	0.0810182	0.049978	2.01816	0.02867
PTPRC	protein tyrosine phosphatase, receptor type C	1.47003	2.07983	0.210752	0.174436	1.74856	0.02915
MTHFD1	methylenetetrahydrofolate dehydrogenase, cyclohydrolase and formyltetrahydrofolate synthetase 1	1.77432	1.27787	0.0136424	0.209396	1.5058	0.02924
REPS1	RALBP1 associated Eps domain containing 1	1.68488	1.39042	0.0345596	0.0340157	1.53069	0.02927
EIF2B3	eukaryotic translation initiation factor 2B subunit gamma	1.67249	1.40814	0.0382897	0.0689384	1.53468	0.02962
CELF2	CUGBP Elav-like family member 2	1.35215	2.94371	0.202297	0.0166696	1.99521	0.02982
SACS	sacsin molecular chaperone	1.71742	1.42393	0.0415619	0.320806	1.56372	0.02984
ZMYM4	zinc finger MYM-type containing 4	1.68438	1.44071	0.0161298	0.142129	1.55788	0.03031
HK2	hexokinase 2	1.2223	6.26268	0.119384	0.0850467	2.76702	0.03036
MAX	MYC associated factor X	1.49523	1.96357	0.00996871	0.205458	1.7135	0.03041
COX18	COX18, cytochrome c oxidase assembly factor	1.69	1.47138	0.0027825	0.140703	1.57679	0.03048
PLD1	phospholipase D1	1.58856	1.97024	0.00767741	0.255779	1.76929	0.03049
TRIM44	tripartite motif containing 44	1.75298	1.29648	0.045653	0.328076	1.50761	0.03064
SNHG5	small nucleolar RNA host gene 5	1.04126	11.1499	0.879965	0.00638476	3.40716	0.03068
CBFB	core-binding factor beta subunit	1.41624	2.38847	0.109637	0.0220809	1.83925	0.03071
CECR5	Cat Eye Syndrome Chromosome Region, Candidate 5	1.4347	2.53415	0.0204283	0.0805325	1.90694	0.0308
AIM1	Absent In Melanoma 1	1.53209	1.57678	0.136752	0.175242	1.55424	0.03083
SLC27A2	solute carrier family 27 member 2	1.68579	1.4489	0.0615304	0.295436	1.56274	0.03117
STK10	serine/threonine kinase 10	1.61354	1.57216	0.00174772	0.0440584	1.59261	0.0313
MRPS27	mitochondrial ribosomal protein S27	1.68976	1.49312	0.00435686	0.194004	1.58831	0.0314
KRT19	keratin 19	-1.09435	24.6285	0.590965	0.00682538	4.74383	0.03182
ENTPD7	ectonucleoside triphosphate diphosphohydrolase 7	1.63416	1.56002	0.00640521	0.0843948	1.59668	0.03182
PREP	prolyl endopeptidase	1.65125	1.4471	0.0125642	0.0564477	1.54583	0.03185
SIGMAR1	sigma non-opioid intracellular receptor 1	1.71063	1.38634	0.00640521	0.247422	1.53988	0.03186
GEMIN7	gem nuclear organelle associated protein 7	1.58758	1.68681	0.00403361	0.0796527	1.63639	0.03189
CRYZ	crystallin zeta	1.27114	4.193	0.334999	0.0755289	2.3084	0.03192
PMPCA	peptidase, mitochondrial processing alpha subunit	1.54956	1.80828	0.0127931	0.0518002	1.67392	0.03195
MRPL4	mitochondrial ribosomal protein L4	1.48361	2.13417	0.0193055	0.0726857	1.77936	0.03211
FAM171A1	family with sequence similarity 171 member A1	1.3082	3.43498	0.223627	0.0197211	2.11999	0.03214
FAM35A	family with sequence similarity 35 member A	1.64475	1.50966	0.0496668	0.163783	1.5758	0.03215
PLEK	pleckstrin	1.31822	2.91439	0.291154	0.0322089	1.96002	0.03216
TMEM45A	transmembrane protein 45A	1.27356	4.51119	0.0706849	0.13099	2.39693	0.03218
XRN2	5'-3' exoribonuclease 2	1.68048	1.42307	0.00776173	0.101412	1.54631	0.03223
EGLN1	egl-9 family hypoxia inducible factor 1	1.3019	3.77589	0.071532	0.0460905	2.21729	0.03226
HSP90B1	heat shock protein 90 beta family member 1	1.59539	1.61715	0.0115897	0.0457474	1.60617	0.03228
SUPV3L1	Suv3 like RNA helicase	1.74368	1.33414	0.00928327	0.258006	1.52532	0.03228
TMEM126A	transmembrane protein 126A	1.6866	1.38615	0.0062376	0.105838	1.52905	0.03305
HIF3A	hypoxia inducible factor 3 alpha subunit	1.04933	11.0886	0.814684	0.00682538	3.41064	0.03336
AVEN	apoptosis and caspase activation inhibitor	1.40283	2.12257	0.26042	0.0348934	1.72563	0.03354
CHCHD1	coiled-coil-helix-coiled-coil-helix domain containing 1	1.70808	1.32952	0.00174058	0.106257	1.50693	0.03363
ERO1L	Endoplasmic Oxidoreductin-1-Like Protein	1.20728	5.0897	0.39724	0.0681877	2.47893	0.0337
NDRG3	NDRG family member 3	1.44426	2.1374	0.0479294	0.0370012	1.75685	0.03372
PRRC2C	proline rich coiled-coil 2C	1.62919	1.40377	0.0863365	0.111988	1.51217	0.03383
TRIB2	tribbles pseudokinase 2	1.67275	1.56708	0.0197259	0.437287	1.61917	0.03412
SLC25A17	solute carrier family 25 member 17	1.47146	2.11329	0.0178674	0.0501155	1.76336	0.03415
PLXNC1	plexin C1	1.50674	2.00258	0.0780504	0.130291	1.73702	0.03415
MTR	5-methyltetrahydrofolate-homocysteine methyltransferase	1.6773	1.40319	0.00876313	0.141662	1.53421	0.03459
PLAC8	placenta specific 8	1.53064	1.78441	0.0897839	0.243732	1.65262	0.03524
EMC1	ER membrane protein complex subunit 1	1.71642	1.31314	0.00665246	0.130785	1.50128	0.03567
RBM28	RNA binding motif protein 28	1.71654	1.31918	0.0127609	0.328854	1.50489	0.03573
ATR	ATR serine/threonine kinase	1.67548	1.34595	0.0235806	0.100907	1.50173	0.03577
IDH3A	isocitrate dehydrogenase 3 (NAD(+)) alpha	1.49391	1.98183	0.00744959	0.0370012	1.72058	0.03578
ZNF195	zinc finger protein 195	1.561	1.61667	0.0434741	0.0250711	1.58856	0.03583
ATP5G1	ATP synthase, H+ transporting, mitochondrial Fo complex subunit C1 (subunit 9)	1.6059	1.60121	0.046643	0.228267	1.60359	0.03587
NR2F6	nuclear receptor subfamily 2 group F member 6	1.51855	1.77873	0.019624	0.0173446	1.64339	0.03639
HPGDS	hematopoietic prostaglandin D synthase	1.00798	9.00088	0.984821	0.0107166	3.01205	0.03673
LRRC34	leucine rich repeat containing 34	1.70171	1.33603	0.0111979	0.45265	1.50784	0.03688
EML4	echinoderm microtubule associated protein like 4	1.60983	1.42983	0.106412	0.02673	1.51722	0.03705
CCT7	chaperonin containing TCP1 subunit 7	1.55962	1.70931	0.0119047	0.0751515	1.63265	0.03739
MRPL12	mitochondrial ribosomal protein L12	1.49298	1.93215	0.0114146	0.121006	1.69837	0.03744
ZBTB10	zinc finger and BTB domain containing 10	1.65395	1.41104	0.0121859	0.248524	1.52765	0.03761
FBN1	fibrillin 1	1.49843	2.13952	0.006812	0.160546	1.79051	0.0381
CUL4A	cullin 4A	1.43073	2.16546	0.0246359	0.0426745	1.76025	0.03815
ATXN10	ataxin 10	1.68792	1.33838	0.00946384	0.0883098	1.50308	0.03852
SMARCC1	SWI/SNF related, matrix associated, actin dependent regulator of chromatin subfamily c member 1	1.57373	1.6681	0.0311022	0.127639	1.62022	0.0386
HNRNPDL	#N/A	1.70029	1.32072	0.0108137	0.164405	1.49858	0.03868
FLNA	filamin A	1.284	3.31619	0.29392	0.0884661	2.06356	0.03881
NME1-NME2	NME1-NME2 readthrough	1.6296	1.64139	0.0304348	0.377414	1.63559	0.03887
GLUD2	glutamate dehydrogenase 2	1.61869	1.4973	0.11526	0.302497	1.5569	0.03888
ATP11A	ATPase phospholipid transporting 11A	1.6081	1.49313	0.0082076	0.0340765	1.54967	0.03888
FUCA2	alpha-L-fucosidase 2	1.55975	1.59845	0.0152299	0.087299	1.57903	0.03891
PLIN2	perilipin 2	1.15086	6.0526	0.417963	0.0687927	2.63922	0.03898
CCT3	chaperonin containing TCP1 subunit 3	1.67453	1.34728	0.012101	0.110608	1.50195	0.03958
GRWD1	glutamate rich WD repeat containing 1	1.63862	1.38824	0.00463068	0.0524453	1.5083	0.04045
YWHAB	tyrosine 3-monooxygenase/tryptophan 5-monooxygenase activation protein beta	1.45856	1.88067	0.064821	0.101645	1.65618	0.04047
IPO5	importin 5	1.71352	1.31548	0.006812	0.229179	1.50128	0.04047
RFK	riboflavin kinase	1.50261	1.72516	0.0651771	0.0306466	1.61005	0.04077
CCNB1IP1	cyclin B1 interacting protein 1	1.61331	1.51168	0.00829239	0.103846	1.56177	0.04105
MCMBP	minichromosome maintenance complex binding protein	1.57196	1.56185	0.014781	0.079118	1.56691	0.04126
ECHDC1	ethylmalonyl-CoA decarboxylase 1	1.59396	1.46814	0.017975	0.0667635	1.52975	0.04178
LGALS1	galectin 1	1.15253	6.44866	0.302984	0.0163079	2.72628	0.04184
AK2	adenylate kinase 2	1.41995	2.33516	0.0612805	0.0852654	1.82083	0.04227
PRDX5	peroxiredoxin 5	1.56607	1.61872	0.0127611	0.0676284	1.5921	0.0425
USP28	ubiquitin specific peptidase 28	1.60226	1.42199	0.0220154	0.108069	1.50943	0.0429
RWDD2B	RWD domain containing 2B	1.47929	1.83817	0.0610808	0.0692929	1.64908	0.04391
PARK7	Parkinsonism associated deglycase	1.6511	1.43777	0.013059	0.248929	1.54083	0.04392
NOC3L	NOC3 like DNA replication regulator	1.61096	1.44166	0.0358018	0.0798446	1.52393	0.04465
CCT8	chaperonin containing TCP1 subunit 8	1.63899	1.41298	0.0121859	0.129431	1.52184	0.04469
ANXA2	annexin A2	1.26725	3.08496	0.136002	0.0766208	1.97707	0.0448
NCL	nucleolin	1.60634	1.48866	0.0168496	0.157406	1.54631	0.04486
ALOX12	arachidonate 12-lipoxygenase, 12S type	1.2232	4.21305	0.129299	0.0192001	2.27015	0.04502
WDR45B	WD repeat domain 45B	1.5255	1.65062	0.0217484	0.0718761	1.5868	0.04563
TRMT1	tRNA methyltransferase 1	1.61287	1.42197	0.0114393	0.0630933	1.51446	0.04625
LDLRAD3	low density lipoprotein receptor class A domain containing 3	1.29211	3.1741	0.089004	0.0197894	2.02511	0.04631
CEBPD	CCAAT/enhancer binding protein delta	1.21563	4.09829	0.323777	0.0715549	2.23214	0.0473
POLR1C	RNA polymerase I subunit C	1.46969	1.90046	0.0193325	0.125169	1.67112	0.04856
MRPL40	mitochondrial ribosomal protein L40	1.60614	1.41226	0.0163308	0.0827508	1.50602	0.04857
FABP5	fatty acid binding protein 5	-1.00931	11.2068	0.969392	0.0307844	3.33222	0.04922
GATC	glutamyl-tRNA amidotransferase subunit C	1.57917	1.50355	0.00170409	0.038942	1.54083	0.04924
SBNO1	strawberry notch homolog 1	1.59236	1.42908	0.0197756	0.0417739	1.50852	0.0494
TMSB10	thymosin beta 10	1.15348	3.31883	0.734132	0.1902	1.95656	0.04944
PGRMC1	progesterone receptor membrane component 1	1.52915	1.73058	0.024241	0.140047	1.62681	0.04944
RICTOR	RPTOR independent companion of MTOR complex 2	1.38646	2.00084	0.232039	0.0650291	1.66556	0.04946
UMPS	uridine monophosphate synthetase	1.56601	1.51807	0.00914096	0.0495523	1.54178	0.04948
EPCAM	epithelial cell adhesion molecule	1.53448	1.63147	0.209532	0.311854	1.58228	0.04961

## Sheet: AB up-regulated
Symbol	Description	FC (present study)	FC (Xu et al.)	adj.P-value (present study)	adj.P-value (Xu et al.)	FC (meta-analysis)	adj.P-value (meta-analysis)
HBD	hemoglobin subunit delta	-44.4133	-41.1006	3.49e-09	0.00923569	-42.72	3.277e-24
HBB	hemoglobin subunit beta	-34.3319	-11.3805	4.25e-05	0.00367617	-19.77	3.14e-20
CA1	carbonic anhydrase 1	-10.0037	-9.75351	0.000135589	0.0457004	-9.878	1.966e-16
CAPRIN2	caprin family member 2	-5.11876	-11.9906	0.000279579	0.00923569	-7.834	2.837e-14
LGALS3	galectin 3	-5.66452	-4.92671	0.000222662	0.0229945	-5.283	7.965e-13
SLC22A16	solute carrier family 22 member 16	-3.60052	-12.7238	0.000355507	0.0197405	-6.768	9.589e-13
GCH1	GTP cyclohydrolase 1	-4.48191	-3.1341	0.000555668	0.0886357	-3.748	1.204e-10
JAZF1	JAZF zinc finger 1	-3.05462	-4.53214	0.00731471	0.0873966	-3.721	3.369e-09
TNXA	tenascin XA (pseudogene)	-2.18412	-9.90522	0.000222695	0.00923569	-4.651	3.925e-09
CLC	Charcot-Leyden crystal galectin	-5.70823	-1.1097	0.00570064	0.931568	-2.517	6.696e-09
CLIC2	chloride intracellular channel 2	-2.73949	-4.13483	0.00396901	0.0466526	-3.366	6.932e-09
AQP1	aquaporin 1 (Colton blood group)	-2.24942	-7.42154	0.000645147	0.0199189	-4.086	8.17e-09
GCNT2	glucosaminyl (N-acetyl) transferase 2, I-branching enzyme (I blood group)	-2.01263	-12.1518	0.00124937	0.0229945	-4.945	8.432e-09
AKR1C3	aldo-keto reductase family 1 member C3	-2.12662	-11.1781	0.00536295	0.0269566	-4.876	8.777e-09
SNORA65	small nucleolar RNA, H/ACA box 65	-6.5284	1.08572	0.000138011	0.474098	-2.452	8.946e-09
MS4A2	membrane spanning 4-domains A2	-5.70319	-1.09096	0.00182781	0.490817	-2.494	9.271e-09
SLC14A1	solute carrier family 14 member 1 (Kidd blood group)	-2.47776	-6.28121	0.0058177	0.145242	-3.945	1.57e-08
BMPR2	bone morphogenetic protein receptor type 2	-2.56734	-4.15126	0.00260581	0.0514361	-3.265	1.576e-08
MAP3K5	mitogen-activated protein kinase kinase kinase 5	-2.73782	-2.95181	0.00108814	0.0224763	-2.843	1.776e-08
TSPO2	translocator protein 2	-2.35749	-5.13936	0.0120791	0.0254364	-3.481	3.615e-08
SERINC5	serine incorporator 5	-1.96129	-9.52977	0.00346916	0.0419074	-4.323	4.077e-08
FAS	Fas cell surface death receptor	-2.33468	-3.84778	0.000581861	0.0457004	-2.997	4.323e-08
KIF21A	kinesin family member 21A	-2.45273	-5.30057	0.0165292	0.0410625	-3.606	4.406e-08
ALDH1A1	aldehyde dehydrogenase 1 family member A1	-3.15917	-2.9439	0.0106761	0.360236	-3.05	4.417e-08
MMD	monocyte to macrophage differentiation associated	-2.21781	-6.00641	0.00552566	0.0477826	-3.65	5.468e-08
RNASE2	ribonuclease A family member 2	-5.13802	1.06251	0.0100787	0.934978	-2.199	5.886e-08
PHLPP2	PH domain and leucine rich repeat protein phosphatase 2	-2.84577	-2.15552	0.00128197	0.0756663	-2.477	6.424e-08
AASS	aminoadipate-semialdehyde synthase	-2.56858	-2.18608	0.000222695	0.0201189	-2.37	9.198e-08
IMPA2	inositol monophosphatase 2	-2.16646	-4.44871	0.00220976	0.0153344	-3.105	9.781e-08
IFI44	interferon induced protein 44	-3.57633	-1.46256	0.0062376	0.303723	-2.287	1.368e-07
CXorf57	chromosome X open reading frame 57	-1.94047	-6.76778	0.00486939	0.00923569	-3.624	2.045e-07
NOTCH2NL	notch 2 N-terminal like	-2.93334	-1.80342	0.00712998	0.152302	-2.3	2.194e-07
TUBB2A	tubulin beta 2A class IIa	-2.01842	-9.8257	0.257803	0.00487864	-4.453	2.453e-07
RANBP10	RAN binding protein 10	-2.01669	-4.27762	0.000629979	0.0161542	-2.937	2.549e-07
IFI27	interferon alpha inducible protein 27	-2.27604	-2.64406	0.00548057	0.512714	-2.453	4.823e-07
PTMS	parathymosin	-2.50564	-1.92772	0.00293658	0.159416	-2.198	5.889e-07
ANKRD36BP2	ankyrin repeat domain 36B pseudogene 2	-2.5306	-2.02883	0.00548057	0.202845	-2.266	6.823e-07
PDZK1IP1	PDZK1 interacting protein 1	-1.76924	-7.85106	0.00486911	0.00923569	-3.727	6.992e-07
SLC50A1	solute carrier family 50 member 1	-2.12487	-2.77772	0.00369829	0.0348038	-2.429	1.29e-06
SGPP1	sphingosine-1-phosphate phosphatase 1	-1.93838	-4.23996	0.0158437	0.0569218	-2.867	1.808e-06
SNTB1	syntrophin beta 1	-1.73963	-7.5398	0.00996871	0.0125656	-3.622	1.814e-06
CAPS2	calcyphosine 2	-1.72656	-9.97399	0.0853027	0.0333791	-4.15	2.126e-06
STOM	stomatin	-2.0655	-2.6252	0.00387891	0.115073	-2.329	3.277e-06
CA2	carbonic anhydrase 2	-2.25551	-1.93857	0.00435548	0.0469543	-2.091	3.282e-06
SCARB2	scavenger receptor class B member 2	-1.48305	-18.5551	0.214019	0.0315918	-5.246	3.325e-06
THRB	thyroid hormone receptor beta	-1.40046	-24.9048	0.0549897	0.016056	-5.906	3.789e-06
SYBU	syntabulin	-2.29214	-1.50753	0.000453218	0.102882	-1.859	3.85e-06
RAB6B	RAB6B, member RAS oncogene family	-1.99963	-3.30492	0.0280889	0.0681349	-2.571	3.871e-06
TNXB	tenascin XB	-2.9836	1.19655	1e-05	0.151597	-1.579	4.964e-06
SERPINE2	serpin family E member 2	-2.07348	-2.80164	0.0160093	0.119124	-2.41	5.023e-06
ARHGEF37	Rho guanine nucleotide exchange factor 37	-1.8168	-3.44354	0.00173884	0.0229945	-2.501	5.808e-06
BCL11A	B-cell CLL/lymphoma 11A	-1.65397	-6.59629	0.0059256	0.0130051	-3.303	5.988e-06
CCDC144A	coiled-coil domain containing 144A	-2.64496	-1.43797	0.153539	0.258247	-1.95	6.137e-06
SOX6	SRY-box 6	-1.61615	-7.47049	0.0699732	0.0601862	-3.475	7.438e-06
FCER1A	Fc fragment of IgE receptor Ia	-3.40708	1.10489	0.00637218	0.416886	-1.756	7.439e-06
BCAM	basal cell adhesion molecule (Lutheran blood group)	-2.42002	-1.22723	0.00124937	0.0873225	-1.723	8.168e-06
SNORA72	small nucleolar RNA, H/ACA box 72	-3.08688	-1.01808	0.00842353	0.877363	-1.773	9.209e-06
HIST1H3B	histone cluster 1 H3 family member b	-2.67711	-1.58537	0.0401846	0.283733	-2.06	1.11e-05
MIR29B2	microRNA 29b-2	-1.84461	-3.5628	0.0574774	0.0681276	-2.564	1.138e-05
FAM188A	family with sequence similarity 188, member A	-1.9743	-2.12634	0.00813478	0.0176951	-2.049	1.259e-05
ANKRD36C	ankyrin repeat domain 36C	-2.56888	-1.07545	0.00496257	0.320875	-1.662	1.668e-05
ST6GALNAC4	ST6 N-acetylgalactosaminide alpha-2,6-sialyltransferase 4	-1.76875	-3.03763	0.00188906	0.0341695	-2.318	1.796e-05
ACSL1	acyl-CoA synthetase long chain family member 1	-1.59598	-5.50874	0.0118334	0.0121117	-2.965	1.955e-05
TRIM10	tripartite motif containing 10	-1.43427	-11.7811	0.0873239	0.0180545	-4.111	2.036e-05
EPDR1	ependymin related 1	-1.52542	-7.15198	0.0160667	0.00682538	-3.303	2.977e-05
CYSLTR2	cysteinyl leukotriene receptor 2	-2.36451	-1.01024	0.000204396	0.875062	-1.546	3.214e-05
ANKRD20A1	ankyrin repeat domain 20 family member A1	-2.00417	-2.509	0.316195	0.0556962	-2.242	3.26e-05
MALAT1	metastasis associated lung adenocarcinoma transcript 1 (non-protein coding)	-2.09549	-1.58298	0.00516598	0.287608	-1.821	3.334e-05
CDK14	cyclin dependent kinase 14	-2.2872	-1.14114	0.00343441	0.142647	-1.616	3.493e-05
HSBP1L1	heat shock factor binding protein 1 like 1	-1.84661	-2.10574	0.00428367	0.0572956	-1.972	3.851e-05
MLLT4	myeloid/lymphoid or mixed-lineage leukemia (trithorax homolog Drosophila); translocated to 4	-2.28813	-1.4859	0.0323377	0.117967	-1.844	3.939e-05
HDC	histidine decarboxylase	-2.90728	1.26202	0.0103806	0.40693	-1.518	4.066e-05
ANKRD36B	ankyrin repeat domain 36B	-2.23424	-1.31697	0.0111065	0.168163	-1.715	4.313e-05
HIST1H3C	histone cluster 1 H3 family member c	-2.19909	-1.71461	0.0984533	0.360695	-1.942	4.579e-05
ABCA5	ATP binding cassette subfamily A member 5	-1.87053	-2.4356	0.0273695	0.0601862	-2.134	4.653e-05
UTY	ubiquitously transcribed tetratricopeptide repeat containing, Y-linked	-2.49832	-1.46877	0.486726	0.130046	-1.916	4.996e-05
CCDC15	coiled-coil domain containing 15	-1.58113	-5.18991	0.12632	0.0101907	-2.865	5.338e-05
CR1L	complement C3b/C4b receptor 1 like	-1.87602	-2.58956	0.0667562	0.00923569	-2.204	5.893e-05
HLA-DRB1	major histocompatibility complex, class II, DR beta 1	-2.70987	-1.04197	0.0840274	0.611822	-1.68	6.008e-05
KLHDC8A	kelch domain containing 8A	-1.60967	-4.21012	0.0236382	0.0461872	-2.603	6.308e-05
PPP2R5B	protein phosphatase 2 regulatory subunit B'beta	-1.57801	-4.70721	0.0111866	0.0522353	-2.725	6.364e-05
FHL2	four and a half LIM domains 2	-1.91325	-1.59475	0.00248823	0.243711	-1.747	6.429e-05
HAGH	hydroxyacylglutathione hydrolase	-1.63507	-3.26683	0.0034812	0.0292094	-2.311	7.019e-05
AQP3	aquaporin 3 (Gill blood group)	-1.86526	-1.72788	0.000581861	0.166992	-1.795	7.774e-05
SCARNA17	small Cajal body-specific RNA 17	-2.11311	-1.56547	0.010523	0.458244	-1.819	8.258e-05
TAB3	TGF-beta activated kinase 1 and MAP3K7 binding protein 3	-1.42863	-6.91412	0.179953	0.0423443	-3.143	8.259e-05
ANKRD36	ankyrin repeat domain 36	-2.15358	-1.3743	0.0252368	0.113525	-1.72	8.289e-05
ZNF462	zinc finger protein 462	-2.22313	-1.08132	0.00486049	0.661405	-1.55	9.661e-05
TPTE2P5	transmembrane phosphoinositide 3-phosphatase and tensin homolog 2 pseudogene 5	-2.18138	-1.1788	0.0117811	0.154652	-1.604	0.000115
PRRG4	proline rich and Gla domain 4	-1.67917	-2.84723	0.0263204	0.0426745	-2.187	0.0001154
PEAR1	platelet endothelial aggregation receptor 1	-1.58709	-3.75811	0.00537881	0.0647845	-2.442	0.0001155
LRP1	LDL receptor related protein 1	-1.56152	-3.66354	0.083504	0.0254462	-2.392	0.0001159
WHAMMP2	WAS protein homolog associated with actin, golgi membranes and microtubules pseudogene 2	-1.84812	-1.75391	0.00709489	0.0425461	-1.8	0.0001225
STXBP1	syntaxin binding protein 1	-1.7608	-1.94701	0.00240374	0.0501155	-1.852	0.0001259
NEURL1B	neuralized E3 ubiquitin protein ligase 1B	-1.30571	-13.2379	0.0990146	0.015309	-4.157	0.0001334
TACC1	transforming acidic coiled-coil containing protein 1	-1.48674	-5.02625	0.0111244	0.00923569	-2.734	0.0001336
LOC100509445	uncharacterized LOC100509445	-1.83663	-2.43554	0.269784	0.0822493	-2.115	0.0001346
SNORA37	small nucleolar RNA, H/ACA box 37	-2.2451	-1.04445	0.00744959	0.816666	-1.531	0.0001347
PPP1R9B	protein phosphatase 1 regulatory subunit 9B	-1.82184	-1.61133	0.00253091	0.0843948	-1.713	0.0001573
RIMKLB	ribosomal modification protein rimK like family member B	-1.66974	-2.72595	0.0270722	0.0346679	-2.133	0.0001718
HIST1H2AJ	histone cluster 1 H2A family member j	-2.08325	-1.70968	0.0740288	0.523213	-1.887	0.0001718
HIST1H2AK	histone cluster 1 H2A family member k	-2.07256	-1.1179	0.00502805	0.721806	-1.522	0.0001877
WNK1	WNK lysine deficient protein kinase 1	-1.67665	-2.47601	0.0322701	0.0664474	-2.038	0.0001932
LOC100190986	uncharacterized LOC100190986	-1.74706	-2.14349	0.0449528	0.110906	-1.935	0.0002029
MFSD6	major facilitator superfamily domain containing 6	-1.58836	-3.30641	0.0945967	0.0490534	-2.292	0.0002032
DLEU2	deleted in lymphocytic leukemia 2 (non-protein coding)	-1.66033	-2.82472	0.0505651	0.11717	-2.166	0.0002227
FMNL3	formin like 3	-1.82551	-1.46178	0.00379447	0.123094	-1.634	0.0002461
USP32P2	ubiquitin specific peptidase 32 pseudogene 2	-1.70396	-2.51668	0.173126	0.0551953	-2.071	0.0002536
ATP7B	ATPase copper transporting beta	-1.54123	-3.43735	0.065262	0.0681349	-2.302	0.0002981
NDFIP1	Nedd4 family interacting protein 1	-1.64297	-2.35079	0.0156774	0.0229945	-1.965	0.0003078
DNAJA4	DnaJ heat shock protein family (Hsp40) member A4	-1.53804	-3.00287	0.00813478	0.0153344	-2.149	0.0003185
RHCE	Rh blood group CcEe antigens	-1.68334	-2.23842	0.0916003	0.0859368	-1.941	0.0003338
NFIA	nuclear factor I A	-1.51891	-3.52648	0.0611446	0.0306651	-2.314	0.0003361
ESR2	estrogen receptor 2	-1.82034	-1.40693	0.0081005	0.0638807	-1.6	0.0003997
GRINA	glutamate ionotropic receptor NMDA type subunit associated protein 1	-1.51195	-3.32962	0.0160667	0.038942	-2.244	0.0004001
HERC6	HECT and RLD domain containing E3 ubiquitin protein ligase family member 6	-1.49645	-3.42691	0.0371919	0.0229945	-2.265	0.0004617
ANKRD20A5P	ankyrin repeat domain 20 family member A5, pseudogene	-2.24186	-1.01254	0.074982	0.862471	-1.507	0.0005013
HLA-A	major histocompatibility complex, class I, A	-2.13484	-1.19591	0.0731962	0.494701	-1.598	0.0005228
POLE2	DNA polymerase epsilon 2, accessory subunit	-1.70878	-1.64727	0.00800146	0.0663272	-1.678	0.0005395
IFITM1	interferon induced transmembrane protein 1	-1.87882	-1.62433	0.0789237	0.364962	-1.747	0.0005927
HLA-F-AS1	HLA-F antisense RNA 1	-1.79653	-1.47426	0.0221495	0.21141	-1.627	0.0006263
A4GALT	alpha 1,4-galactosyltransferase (P blood group)	-1.49819	-3.08879	0.0427509	0.0333791	-2.151	0.0006353
C5orf42	chromosome 5 open reading frame 42	-1.81391	-1.30887	0.00474601	0.270203	-1.541	0.0006372
C11orf80	chromosome 11 open reading frame 80	-1.72472	-1.68987	0.0141291	0.0715549	-1.707	0.0006386
PNP	purine nucleoside phosphorylase	-1.73439	-1.55326	0.0057094	0.184068	-1.641	0.0006413
GFOD1	glucose-fructose oxidoreductase domain containing 1	-1.62557	-2.0535	0.0102811	0.112824	-1.827	0.0007285
GAS2L3	growth arrest specific 2 like 3	-1.4477	-3.53634	0.100233	0.0247628	-2.263	0.0007343
SAMD9L	sterile alpha motif domain containing 9 like	-1.56448	-2.53216	0.0612318	0.0308608	-1.99	0.000736
TSPO	translocator protein	-1.56877	-2.21037	0.00781367	0.050967	-1.862	0.0007586
SLC22A23	solute carrier family 22 member 23	-1.55293	-2.48761	0.0695427	0.064314	-1.965	0.0007598
VPS13B	vacuolar protein sorting 13 homolog B	-1.52232	-2.6172	0.105526	0.0292094	-1.996	0.0007839
OSBPL2	oxysterol binding protein like 2	-1.44317	-3.45706	0.00825208	0.00923569	-2.234	0.0007946
NUDT4	nudix hydrolase 4	-1.39246	-4.4997	0.201478	0.0715549	-2.503	0.0007961
CTNNA1	catenin alpha 1	-1.67277	-1.62445	0.0031459	0.0467256	-1.648	0.0007978
IQSEC1	IQ motif and Sec7 domain 1	-1.50292	-2.59508	0.00356054	0.0130051	-1.975	0.0009312
APOL3	apolipoprotein L3	-1.62387	-1.61383	0.00552566	0.382104	-1.619	0.001046
STRIP2	striatin interacting protein 2	-1.45129	-3.18794	0.0290766	0.0142244	-2.151	0.001095
SLC25A15	solute carrier family 25 member 15	-1.51416	-2.34961	0.082606	0.0948179	-1.886	0.001173
HIST1H1B	histone cluster 1 H1 family member b	-1.82714	-1.23913	0.00998892	0.456566	-1.505	0.001257
TRIB3	tribbles pseudokinase 3	-1.62298	-2.47342	0.0816491	0.489037	-2.004	0.001386
H2AFY	H2A histone family member Y	-1.36005	-4.42551	0.27233	0.0139008	-2.453	0.001432
SLC22A4	solute carrier family 22 member 4	-1.35595	-4.67029	0.180028	0.0874797	-2.516	0.00154
AKR1C1	aldo-keto reductase family 1, member C1	-1.77027	-1.27104	0.0132956	0.0851347	-1.5	0.001573
ENDOD1	endonuclease domain containing 1	-1.51519	-2.41787	0.0551756	0.137189	-1.914	0.001901
TUBG2	tubulin gamma 2	-1.25869	-6.78281	0.171245	0.0180185	-2.922	0.002059
CDYL2	chromodomain Y like 2	-1.34291	-4.46655	0.0444504	0.0128455	-2.449	0.002073
CD36	CD36 molecule	-1.3378	-4.51041	0.0346407	0.0182515	-2.456	0.002169
B3GALNT1	beta-1,3-N-acetylgalactosaminyltransferase 1 (globoside blood group)	-1.00333	-26.2526	0.988779	0.0418643	-5.132	0.002193
HDGFRP3	hepatoma-derived growth factor related protein 3	-1.62855	-1.58474	0.0193832	0.104057	-1.606	0.002221
CBX4	chromobox 4	-1.41892	-3.31726	0.0551976	0.0820119	-2.17	0.002231
ZNF563	zinc finger protein 563	-1.65896	-1.50806	0.0742958	0.112686	-1.582	0.0023
SVIP	small VCP interacting protein	-1.51595	-2.04853	0.065846	0.0178841	-1.762	0.002306
HLA-C	major histocompatibility complex, class I, C	-1.67049	-1.59041	0.132342	0.0824164	-1.63	0.002417
ENG	endoglin	-1.35319	-3.45263	0.385715	0.0583823	-2.161	0.002621
SUCO	SUN domain containing ossification factor	-1.33205	-3.11035	0.299117	0.0391937	-2.035	0.002765
BOLA2	bolA family member 2	-1.6567	-1.36634	0.0245529	0.198646	-1.505	0.002848
GCLM	glutamate-cysteine ligase modifier subunit	-1.235	-5.64984	0.274531	0.0306466	-2.642	0.003619
LOC643201	centrosomal protein 192kDa pseudogene	-1.27265	-5.02486	0.124074	0.0478957	-2.529	0.003659
CDKN2C	cyclin dependent kinase inhibitor 2C	-1.26926	-4.35289	0.30003	0.0497639	-2.351	0.003766
SLC2A4RG	SLC2A4 regulator	-1.34907	-3.45781	0.0144171	0.0247628	-2.16	0.003958
PTPLA	Protein Tyrosine Phosphatase-Like (Proline Instead Of Catalytic Arginine), Member A	-1.44735	-2.22805	0.0252876	0.0254462	-1.796	0.00405
TNS1	tensin 1	-1.3161	-4.32598	0.080317	0.0981158	-2.386	0.00412
MARCH8	membrane associated ring-CH-type finger 8	-1.39244	-2.7174	0.103632	0.0275872	-1.945	0.004216
WWC3	WWC family member 3	-1.28478	-4.74892	0.376687	0.11908	-2.47	0.004404
MCUR1	mitochondrial calcium uniporter regulator 1	-1.55503	-1.69426	0.116219	0.0372088	-1.623	0.004406
LOC439994	uncharacterized LOC439994	-1.51384	-2.15237	0.0361965	0.330867	-1.805	0.00446
ZMIZ1	zinc finger MIZ-type containing 1	-1.38829	-2.79704	0.055943	0.0592892	-1.971	0.004544
SRGAP2	SLIT-ROBO Rho GTPase activating protein 2	-1.5629	-1.81952	0.0821885	0.228552	-1.686	0.004577
FHDC1	FH2 domain containing 1	-1.38153	-2.50495	0.318676	0.187857	-1.86	0.005161
RNF144A	ring finger protein 144A	-1.25259	-3.27535	0.529166	0.0175941	-2.026	0.005515
STK17B	serine/threonine kinase 17b	-1.415	-2.39419	0.123592	0.0726857	-1.841	0.005564
IRS2	insulin receptor substrate 2	-1.36423	-2.80198	0.150936	0.0945694	-1.955	0.005822
GUK1	guanylate kinase 1	-1.5481	-1.5763	0.0128208	0.231329	-1.562	0.005835
ZNF718	zinc finger protein 718	-1.09728	-4.74253	0.821959	0.0315918	-2.281	0.006401
PLSCR4	phospholipid scramblase 4	-1.20369	-4.50607	0.501183	0.0139008	-2.329	0.006513
TUBA1A	tubulin alpha 1a	-1.47724	-1.88342	0.0588231	0.0594154	-1.668	0.007174
NPIPA5	nuclear pore complex interacting protein family member A5	-1.32839	-2.91602	0.131581	0.050416	-1.968	0.007179
TMCC2	transmembrane and coiled-coil domain family 2	-1.43393	-2.68234	0.04141	0.328546	-1.961	0.007428
NT5M	5',3'-nucleotidase, mitochondrial	-1.44326	-1.98501	0.0455084	0.0348934	-1.693	0.007603
HECTD4	HECT domain E3 ubiquitin protein ligase 4	-1.51191	-1.55708	0.0549897	0.21878	-1.534	0.009006
TPM1	tropomyosin 1	-1.4188	-2.11382	0.0378108	0.041646	-1.732	0.009319
PACSIN2	protein kinase C and casein kinase substrate in neurons 2	-1.41234	-2.0023	0.157456	0.120952	-1.682	0.009612
RHD	Rh blood group D antigen	-1.22121	-3.06782	0.591169	0.110275	-1.936	0.009834
PKD2	polycystin 2, transient receptor potential cation channel	-1.41766	-2.00095	0.0655868	0.0386328	-1.684	0.01002
FBXO9	F-box protein 9	-1.46345	-1.86358	0.062649	0.28332	-1.651	0.01022
HP1BP3	heterochromatin protein 1 binding protein 3	-1.42518	-1.78693	0.128402	0.0405513	-1.596	0.01024
MORC3	MORC family CW-type zinc finger 3	-1.40672	-1.77726	0.281786	0.0664717	-1.581	0.01056
MAP2K2	mitogen-activated protein kinase kinase 2	-1.40278	-2.02025	0.0465943	0.0719078	-1.683	0.01058
DDIT3	DNA damage inducible transcript 3	-1.41736	-1.82738	0.353481	0.409659	-1.609	0.01095
KAT2B	lysine acetyltransferase 2B	-1.27547	-3.10188	0.281058	0.0590657	-1.989	0.01109
SRGAP2C	SLIT-ROBO Rho GTPase activating protein 2C	-1.36272	-2.07788	0.222002	0.160483	-1.683	0.01127
CPEB1	cytoplasmic polyadenylation element binding protein 1	-1.32167	-2.47839	0.195509	0.0226489	-1.81	0.01182
FOXO3	forkhead box O3	-1.27017	-4.08072	0.154327	0.140012	-2.277	0.01211
TCEA1	transcription elongation factor A1	-1.33268	-2.37306	0.24835	0.0867061	-1.778	0.01236
F8A1	coagulation factor VIII associated 1	-1.41297	-2.00013	0.038768	0.0694962	-1.681	0.01241
SPTLC2	serine palmitoyltransferase long chain base subunit 2	-1.28896	-2.81534	0.175314	0.0707188	-1.905	0.01278
HIST1H2AM	histone cluster 1 H2A family member m	-1.50235	-1.87559	0.0522936	0.591946	-1.679	0.01298
RFXAP	regulatory factor X associated protein	-1.27853	-3.14365	0.176798	0.0307844	-2.005	0.01305
SLC9B2	solute carrier family 9 member B2	-1.47843	-1.53817	0.0706849	0.0174479	-1.508	0.01348
HIST1H3A	histone cluster 1 H3 family member a	-1.52371	-1.94769	0.13809	0.51716	-1.723	0.0137
CCDC14	coiled-coil domain containing 14	-1.35385	-1.96393	0.290239	0.0173446	-1.631	0.01549
LYST	lysosomal trafficking regulator	-1.44985	-1.56137	0.119918	0.137757	-1.505	0.01724
CDR2	cerebellar degeneration related protein 2	-1.27604	-3.6268	0.123363	0.136932	-2.151	0.0174
C6orf223	chromosome 6 open reading frame 223	-1.28882	-2.98598	0.0925194	0.0444144	-1.962	0.01756
MICALL1	MICAL like 1	-1.20645	-4.15021	0.250491	0.0294846	-2.238	0.01775
MSRB3	methionine sulfoxide reductase B3	-1.16862	-3.99598	0.449115	0.0413005	-2.161	0.01775
MBOAT2	membrane bound O-acyltransferase domain containing 2	-1.29945	-2.41812	0.171154	0.0178841	-1.773	0.01781
CSGALNACT2	chondroitin sulfate N-acetylgalactosaminyltransferase 2	-1.26894	-2.49033	0.406885	0.186436	-1.778	0.01795
ZDHHC2	zinc finger DHHC-type containing 2	-1.22	-2.5342	0.551021	0.0501155	-1.758	0.01797
ZNF23	zinc finger protein 23	-1.34175	-2.10701	0.237285	0.0543755	-1.681	0.01823
CTDSPL	CTD small phosphatase like	-1.44361	-1.57639	0.00946298	0.030945	-1.509	0.01824
CDK19	cyclin dependent kinase 19	-1.4067	-1.68816	0.0693754	0.0662233	-1.541	0.01829
DSG2	desmoglein 2	-1.26287	-3.03268	0.319817	0.0306466	-1.957	0.0183
CD44	CD44 molecule (Indian blood group)	-1.26638	-2.66277	0.29915	0.0306466	-1.836	0.01884
ACHE	acetylcholinesterase (Cartwright blood group)	-1.37346	-2.13279	0.0118913	0.0996217	-1.712	0.01885
PAQR9	progestin and adipoQ receptor family member 9	-1.10252	-6.91374	0.600397	0.0850467	-2.761	0.01914
GLIPR2	GLI pathogenesis related 2	-1.27467	-2.88193	0.129044	0.0107507	-1.917	0.01925
CPEB4	cytoplasmic polyadenylation element binding protein 4	-1.17481	-2.60754	0.717191	0.263543	-1.75	0.01926
FSD1L	fibronectin type III and SPRY domain containing 1 like	-1.40422	-1.7467	0.0340699	0.0479768	-1.566	0.01931
SENP7	SUMO1/sentrin specific peptidase 7	-1.2416	-2.57835	0.418506	0.0372088	-1.789	0.01956
LYSMD2	LysM domain containing 2	-1.15597	-5.15983	0.355447	0.0229945	-2.442	0.02024
CREBRF	CREB3 regulatory factor	-1.30349	-2.28825	0.349936	0.252034	-1.727	0.02031
CPEB2	cytoplasmic polyadenylation element binding protein 2	-1.36941	-1.91717	0.0812913	0.18068	-1.62	0.02049
KIAA0930	KIAA0930	-1.27268	-2.94036	0.06123	0.0130051	-1.934	0.02074
LOC399491	uncharacterized LOC399491	-1.33785	-2.26594	0.0693898	0.0657766	-1.741	0.02083
NPIPA1	nuclear pore complex interacting protein family member A1	-1.27879	-2.52289	0.177432	0.0718761	-1.796	0.02099
SMIM5	small integral membrane protein 5	-1.25631	-2.86989	0.230826	0.0851852	-1.899	0.02106
GDPD5	glycerophosphodiester phosphodiesterase domain containing 5	-1.42196	-1.6595	0.0182091	0.0811627	-1.536	0.02123
IRF9	interferon regulatory factor 9	-1.43138	-1.59897	0.156155	0.13915	-1.513	0.02126
FAM13A	family with sequence similarity 13 member A	-1.29842	-1.99188	0.323166	0.0343679	-1.608	0.02169
H1FX	H1 histone family member X	-1.43521	-1.64855	0.0243923	0.239088	-1.538	0.02177
PPDPF	pancreatic progenitor cell differentiation and proliferation factor	-1.31375	-2.411	0.0417712	0.0405513	-1.78	0.02207
FAM65A	Family With Sequence Similarity 65, Member A	-1.23591	-3.19553	0.20872	0.0120898	-1.987	0.02212
FAM133B	family with sequence similarity 133 member B	-1.38111	-1.65751	0.273825	0.0612221	-1.513	0.02254
SMOX	spermine oxidase	-1.18341	-4.38035	0.410211	0.167373	-2.277	0.02286
DOCK5	dedicator of cytokinesis 5	-1.35085	-1.8942	0.112501	0.104057	-1.6	0.0237
HIST1H2AD	histone cluster 1 H2A family member d	-1.35679	-2.58309	0.177076	0.503942	-1.872	0.02407
ZNF83	zinc finger protein 83	-1.32372	-1.98124	0.339004	0.0630435	-1.619	0.02418
HIST1H4A	histone cluster 1 H4 family member a	-1.28838	-3.44954	0.297908	0.466702	-2.108	0.02469
SLC46A3	solute carrier family 46 member 3	-1.27363	-2.56765	0.178246	0.02673	-1.808	0.02504
SLC18A2	solute carrier family 18 member A2	-1.38323	-1.76562	0.0295705	0.0635934	-1.563	0.02506
MOSPD1	motile sperm domain containing 1	-1.16878	-3.66313	0.63188	0.0312546	-2.069	0.02511
DGKA	diacylglycerol kinase alpha	-1.33955	-2.08351	0.0184467	0.0459714	-1.671	0.02513
NBPF3	NBPF member 3	-1.31038	-1.99085	0.295179	0.0572185	-1.615	0.02622
SSBP3	single stranded DNA binding protein 3	-1.32304	-2.25173	0.0319021	0.0358243	-1.726	0.02625
CNNM2	cyclin and CBS domain divalent metal cation transport mediator 2	-1.2742	-2.88102	0.0429601	0.0687927	-1.916	0.02633
TMEM86B	transmembrane protein 86B	-1.2004	-3.79013	0.248847	0.0884661	-2.133	0.02802
PRC1	protein regulator of cytokinesis 1	-1.28596	-2.46512	0.10108	0.0153344	-1.78	0.02828
BCL2L1	BCL2 like 1	-1.34042	-2.01909	0.301363	0.253797	-1.645	0.03029
FKBP1B	FK506 binding protein 1B	-1.21764	-2.94553	0.237573	0.0528036	-1.894	0.03034
OPTN	optineurin	-1.06993	-6.73132	0.718503	0.0372088	-2.684	0.03044
C12orf57	chromosome 12 open reading frame 57	-1.37214	-1.77176	0.0188781	0.0524	-1.559	0.03055
FCGR2A	Fc fragment of IgG receptor IIa	-1.26328	-2.57269	0.163377	0.02673	-1.803	0.03059
FAM83D	family with sequence similarity 83 member D	-1.29722	-2.17218	0.121593	0.0172668	-1.679	0.03066
C15orf57	Chromosome 15 Open Reading Frame 57	-1.26573	-2.7469	0.145293	0.0707188	-1.865	0.03067
YPEL4	yippee like 4	-1.21735	-3.14142	0.211124	0.0676284	-1.956	0.03179
CCDC18	coiled-coil domain containing 18	-1.28579	-2.08808	0.264843	0.0283042	-1.639	0.0328
SEPP1	Selenoprotein P, Plasma, 1	1.01651	-8.68676	0.945619	0.0368315	-2.923	0.03324
GPR56	G Protein-Coupled Receptor 56	-1.26797	-2.43199	0.0946029	0.053324	-1.756	0.03351
NFIC	nuclear factor I C	-1.35461	-1.85846	0.182416	0.0478957	-1.587	0.03383
SNORD3A	small nucleolar RNA, C/D box 3A	-1.36947	-2.06578	0.16996	0.45741	-1.682	0.03524
STK32B	serine/threonine kinase 32B	-1.11658	-3.77278	0.654469	0.10041	-2.052	0.03525
REC8	REC8 meiotic recombination protein	-1.2456	-2.50588	0.220296	0.00923569	-1.767	0.03644
NUTM2A-AS1	NUTM2A antisense RNA 1	-1.20291	-1.93668	0.665053	0.0805325	-1.526	0.03789
RNF217	ring finger protein 217	-1.09107	-4.54195	0.714291	0.0359654	-2.226	0.03913
GTSF1	gametocyte specific factor 1	-1.34692	-1.72732	0.127607	0.0362191	-1.525	0.03936
TMEM246	transmembrane protein 246	-1.17859	-3.73704	0.190811	0.0495353	-2.099	0.03943
KIF26A	kinesin family member 26A	-1.26027	-2.65697	0.0997497	0.0808003	-1.83	0.03991
MAP7	microtubule associated protein 7	-1.28685	-1.94585	0.154409	0.460167	-1.582	0.04051
FOXO1	forkhead box O1	-1.28163	-2.13669	0.227233	0.0572795	-1.655	0.04094
NFIX	nuclear factor I X	-1.33941	-1.83488	0.0373282	0.0556731	-1.568	0.0414
COL15A1	collagen type XV alpha 1 chain	-1.13141	-5.25528	0.460626	0.16167	-2.438	0.04197
VEGFA	vascular endothelial growth factor A	-1.16349	-3.62156	0.346423	0.0332972	-2.053	0.04279
PLEKHH3	pleckstrin homology, MyTH4 and FERM domain containing H3	-1.19866	-2.991	0.241211	0.0130051	-1.893	0.04298
NPL	N-acetylneuraminate pyruvate lyase	-1.27711	-2.02437	0.372726	0.121432	-1.608	0.04307
CHST12	carbohydrate sulfotransferase 12	-1.16965	-3.43803	0.303757	0.0161176	-2.005	0.0438
RAB11FIP3	RAB11 family interacting protein 3	-1.31551	-1.78535	0.0605692	0.170295	-1.533	0.04621
PPAPDC1A	Phosphatidic Acid Phosphatase Type 2 Domain-Containing Protein 1A	-1.33013	-1.74529	0.103843	0.112935	-1.524	0.04682
MXD3	MAX dimerization protein 3	-1.28665	-2.00539	0.153665	0.0309587	-1.606	0.04734
EIF5A	eukaryotic translation initiation factor 5A	-1.07318	-5.81572	0.628764	0.0240228	-2.498	0.04748
HOOK1	hook microtubule tethering protein 1	-1.02469	-4.36455	0.947874	0.0303336	-2.115	0.04758
TRAK2	trafficking kinesin protein 2	-1.0209	-3.58719	0.961386	0.0934577	-1.914	0.0481
KIAA1841	KIAA1841	-1.16604	-3.37919	0.327629	0.0774834	-1.985	0.04944
NAPB	NSF attachment protein beta	-1.30308	-1.73489	0.287958	0.0731168	-1.504	0.04989
