# Supplementary material for: Comparison of gene expression profiles between human erythroid cells derived from fetal liver and adult peripheral blood
Source: PeerJ. 2018 Aug 31;6:e5527. doi: 10.7717/peerj.5527 (PMC6120446; doi:10.7717/peerj.5527)
Supplement: Table S5 — The list of enriched biological pathways and GO terms obtained from the ToppFun program using the training sets of meta-analysis significant genes are shown for fetal liver (FL) up-regulated and adult peripheral blood (AB) up-regulated gene groups. GO terms are separated into biological process (BP), molecular function (MF), cellular component (CC). The pathway/GO p-value and q-value are reported along with the list of genes associated with each pathway/GO term. [file peerj-06-5527-s010.xlsx]

## Sheet: pathway_FL
ID	Name	Source	p-value	q-value Bonferroni	q-value FDR B&H	q-value FDR B&Y	Hit Count in Query List	Hit Count in Genome	Hit in Query List
1457780	Neutrophil degranulation	BioSystems: REACTOME	2.672e-14	5.624e-11	5.624e-11	4.628e-10	55	492	ACLY,CLEC5A,CTSC,PLAC8,FABP5,S100A8,S100A9,S100A12,SERPINB6,FCER1G,MGST1,FCN1,PKM,BIN2,PLD1,MMP9,ALDOA,ALDOC,MNDA,HSP90AB1,MPO,ANXA2,FPR1,SLC2A3,CCT8,FUCA2,CTSG,CTSS,CYBB,PRTN3,IMPDH2,IQGAP2,SNAP23,ITGAV,PGRMC1,IQGAP1,STK10,PTPRC,PTPRJ,ATP11A,SLC27A2,KPNB1,DOCK2,GPI,RAB31,OLR1,ACTR2,GSTP1,SLCO4C1,CD14,GYG1,CD53,CD68,SERPINB1,LYZ
1268844	Mitochondrial translation elongation	BioSystems: REACTOME	2.305e-10	4.852e-07	2.426e-07	1.997e-06	19	89	MRPL12,MRPS35,TUFM,MRPL35,MRPS28,MRPL58,MRPL15,MRPS15,MRPS23,MRPL40,GFM1,MRPL11,MRPS27,MRPL16,ERAL1,CHCHD1,MRPL2,MRPL4,MRPS7
1268842	Mitochondrial translation	BioSystems: REACTOME	7.523e-10	1.584e-06	5.278e-07	4.344e-06	19	95	MRPL12,MRPS35,TUFM,MRPL35,MRPS28,MRPL58,MRPL15,MRPS15,MRPS23,MRPL40,GFM1,MRPL11,MRPS27,MRPL16,ERAL1,CHCHD1,MRPL2,MRPL4,MRPS7
1383087	rRNA modification in the nucleus and cytosol	BioSystems: REACTOME	3.734e-09	7.861e-06	1.965e-06	1.617e-05	15	63	FBL,UTP15,WDR36,NOP14,PDCD11,BMS1,WDR43,WDR3,DIMT1,UTP20,NOP2,HEATR1,UTP11,UTP4,NAT10
1268845	Mitochondrial translation termination	BioSystems: REACTOME	1.036e-08	2.18e-05	3.634e-06	2.991e-05	17	88	MRPL12,MRPS35,MRPL35,MRPS28,MRPL58,MRPL15,MRPS15,MRPS23,MRPL40,MRPL11,MRPS27,MRPL16,ERAL1,CHCHD1,MRPL2,MRPL4,MRPS7
1268843	Mitochondrial translation initiation	BioSystems: REACTOME	1.036e-08	2.18e-05	3.634e-06	2.991e-05	17	88	MRPL12,MRPS35,MRPL35,MRPS28,MRPL58,MRPL15,MRPS15,MRPS23,MRPL40,MRPL11,MRPS27,MRPL16,ERAL1,CHCHD1,MRPL2,MRPL4,MRPS7
1383085	rRNA processing	BioSystems: REACTOME	1.414e-08	2.976e-05	4.252e-06	3.499e-05	26	203	FBL,MRM1,RPS23,UTP15,XRN2,WDR36,NOB1,NOP14,TSR1,PDCD11,WDR12,BMS1,PNO1,WDR43,WDR3,DIMT1,UTP20,NOP2,RIOK1,EXOSC3,HEATR1,UTP11,UTP4,PES1,NAT10,LTV1
169351	Validated targets of C-MYC transcriptional activation	BioSystems: Pathway Interaction Database	2.019e-08	4.251e-05	4.968e-06	4.088e-05	16	81	NME1-NME2,MAX,HMGA1,SERPINI1,MMP9,HSPA4,LIN28B,MYC,BCAT1,NCL,RUVBL2,DDX18,E2F3,LDHA,CDCA7,ENO1
1427846	rRNA processing in the nucleus and cytosol	BioSystems: REACTOME	2.144e-08	4.512e-05	4.968e-06	4.088e-05	25	193	FBL,RPS23,UTP15,XRN2,WDR36,NOB1,NOP14,TSR1,PDCD11,WDR12,BMS1,PNO1,WDR43,WDR3,DIMT1,UTP20,NOP2,RIOK1,EXOSC3,HEATR1,UTP11,UTP4,PES1,NAT10,LTV1
1269203	Innate Immune System	BioSystems: REACTOME	2.36e-08	4.968e-05	4.968e-06	4.088e-05	85	1312	HSP90B1,ACLY,CLEC5A,CTSC,CLEC7A,TLR8,ADCY7,PLAC8,FABP5,PHB,TXN,S100A8,S100A9,S100A12,SERPINB6,FCER1G,MGST1,MAVS,FCN1,PIK3R1,PKM,BIN2,PLD1,MMP9,ALDOA,ALDOC,MNDA,HSP90AB1,MPO,ANXA2,FPR1,POLR1C,RICTOR,APP,YWHAB,SLC2A3,POLR3B,THEM4,TBK1,CCT8,PRKAR2A,PRKCA,FUCA2,CTSG,CTSS,PROS1,CYBB,DHX36,PRTN3,IMPDH2,NCKAP1,IQGAP2,PSMB2,SNAP23,PSMC4,ITGAV,PGRMC1,IQGAP1,STK10,KSR1,PTPRC,PTPRJ,MAPKAPK3,ATP11A,SLC27A2,K…
PW:0000057	carbon fixation	Pathway Ontology	9.821e-08	0.0002067	1.785e-05	0.0001469	7	13	MDH2,PKLR,PKM,ALDOA,ALDOC,GOT2,TKT
814926	Carbon metabolism	BioSystems: KEGG	1.017e-07	0.0002142	1.785e-05	0.0001469	18	114	HK2,ACO2,MDH2,ME2,PGK1,PKLR,PKM,FH,ALDOA,ALDOC,IDH3A,PHGDH,GLUD2,DLAT,GOT2,GPI,TKT,ENO1
MAP00010_Glycolysis_Gluconeogenesis	MAP00010 Glycolysis Gluconeogenesis	GenMAPP	2.01e-07	0.0004232	3.255e-05	0.0002679	12	52	HK2,PGK1,PKLR,PKM,ALDH1B1,ALDOA,ALDOC,DLAT,GPI,LDHA,LDHB,ENO1
835393	superpathway of conversion of glucose to acetyl CoA and entry into the TCA cycle	BioSystems: BIOCYC	3.255e-07	0.0006851	4.586e-05	0.0003774	10	36	ACO2,MDH2,PGK1,PKLR,PKM,FH,ALDOA,ALDOC,IDH3A,DLAT
790012	Biosynthesis of amino acids	BioSystems: KEGG	3.268e-07	0.0006879	4.586e-05	0.0003774	14	75	ACO2,PGK1,PKLR,PKM,ALDOA,ALDOC,IDH3A,MTR,CTH,BCAT1,PHGDH,GOT2,TKT,ENO1
1383086	Major pathway of rRNA processing in the nucleolus and cytosol	BioSystems: REACTOME	4.683e-07	0.0009859	6.162e-05	0.0005071	22	181	FBL,RPS23,UTP15,XRN2,WDR36,NOB1,NOP14,TSR1,PDCD11,WDR12,BMS1,PNO1,WDR43,WDR3,UTP20,RIOK1,EXOSC3,HEATR1,UTP11,UTP4,PES1,LTV1
MAP00710_Carbon_fixation	MAP00710 Carbon fixation	GenMAPP	5.965e-07	0.001256	7.386e-05	0.0006078	7	16	MDH2,PGK1,PKLR,PKM,ALDOA,ALDOC,GOT2
199378	Ribosome biogenesis in eukaryotes	BioSystems: KEGG	9.785e-07	0.00206	0.0001144	0.0009417	16	106	GTPBP4,FBL,UTP15,XRN2,WDR36,NOB1,BMS1,WDR43,WDR3,NXF3,GNL3,RIOK1,HEATR1,RBM28,UTP4,NAT10
413340	Glycolysis (Embden-Meyerhof pathway), glucose => pyruvate	BioSystems: KEGG	1.531e-06	0.003222	0.0001696	0.001396	8	25	HK2,PGK1,PKLR,PKM,ALDOA,ALDOC,GPI,ENO1
82926	Glycolysis / Gluconeogenesis	BioSystems: KEGG	3.599e-06	0.007576	0.0003788	0.003118	12	67	HK2,PGK1,PKLR,PKM,ALDH1B1,ALDOA,ALDOC,DLAT,GPI,LDHA,LDHB,ENO1
PW:0000025	glycolysis/gluconeogenesis	Pathway Ontology	5.358e-06	0.01128	0.0005371	0.00442	8	29	HK2,PKLR,PKM,ALDOA,ALDOC,LDHA,LDHB,ENO1
82998	Pyruvate metabolism	BioSystems: KEGG	6.903e-06	0.01453	0.0006605	0.005436	9	39	MDH2,ME2,PKLR,PKM,ALDH1B1,FH,DLAT,LDHA,LDHB
MAP00620_Pyruvate_metabolism	MAP00620 Pyruvate metabolism	GenMAPP	9.249e-06	0.01947	0.0008465	0.006966	8	31	MDH2,ME2,PKLR,PKM,ALDH1B1,DLAT,LDHA,LDHB
1269960	Glycolysis	BioSystems: REACTOME	1.195e-05	0.02516	0.001048	0.008627	8	32	HK2,PGK1,PKLR,PKM,ALDOA,ALDOC,GPI,ENO1
132956	Metabolic pathways	BioSystems: KEGG	1.277e-05	0.02688	0.001075	0.008848	74	1272	GPHN,RFK,ABAT,NME1-NME2,HK2,AGPAT5,RPN2,ACLY,ACO2,PFAS,HMGCS1,MDH2,PGK1,FAH,ACSM3,AHCY,PKLR,PKM,AK2,ALG8,UMPS,POLR1B,ACAA2,ALAS1,PLD1,ALDH1B1,FH,ALDOA,ALDOC,ALOX12,MPI,HSD17B7,PNMT,COX6A1,POLR1C,IDH3A,PPAT,PAICS,POLR3B,MTHFD1,NT5C2,MTR,CTH,ATIC,SORD,ATP5MC1,IMPDH2,SRM,DAD1,GBE1,BCAT1,BCKDHB,MCCC2,NDUFA9,PHGDH,TWISTNB,PHOSPHO1,HPGDS,DHCR24,GLUD2,DLAT,ALG1,GOT2,GPI,PLA2G7,GATC,LDHA,LDHB,NAMPT,TKT,G…
138057	ErbB1 downstream signaling	BioSystems: Pathway Interaction Database	1.442e-05	0.03035	0.001167	0.009606	14	102	PIK3R1,PLD1,RICTOR,YWHAB,PRKCA,MYC,NCKAP1,STAT3,IQGAP1,KSR1,GRB2,ACTR2,EGR1,PEBP1
138045	HIF-1-alpha transcription factor network	BioSystems: Pathway Interaction Database	1.614e-05	0.03397	0.001258	0.01035	11	65	HK2,PGK1,PLIN2,CITED2,PKM,ABCG2,ALDOA,EGLN1,BNIP3,LDHA,ENO1
1269649	Gene Expression	BioSystems: REACTOME	1.851e-05	0.03897	0.001392	0.01145	98	1844	SEH1L,NR2F6,RPN2,FBL,MRM1,RPS23,CHD4,WARS2,TXN,EFTUD2,CITED2,UTP15,PRMT5,MLLT3,PLAGL1,POLR1B,PRDX5,EIF3M,PUS7,TAF1D,XRN2,TYW3,WDR36,RTCB,COX6A1,NOB1,POLR1C,TRMT1,GEMIN5,RICTOR,PPA1,SKIL,YWHAB,DIS3,IGF2BP1,IGF2BP3,IARS2,TRMT6,POLR3B,NOP14,TSR1,INTS13,TET1,PPIL1,EIF5B,PDCD11,PRKCA,INTS9,WDR12,EIF3G,EIF3I,SNRPC,SNRPD1,MYC,ATR,PSMB2,BMS1,ZNF195,PNO1,PSMC4,DARS,NSUN2,SMYD2,WDR43,WDR3,TWISTNB,DIMT1,EIF…
413392	Inosine monophosphate biosynthesis, PRPP + glutamine => IMP	BioSystems: KEGG	2.241e-05	0.04718	0.001627	0.01339	4	6	PFAS,PPAT,PAICS,ATIC
104488	Cysteine and methionine metabolism	BioSystems: KEGG	2.388e-05	0.05027	0.001676	0.01379	9	45	MDH2,AHCY,MTR,CTH,SRM,BCAT1,GOT2,LDHA,LDHB
1269959	Glucose metabolism	BioSystems: REACTOME	2.704e-05	0.05693	0.001836	0.01511	12	81	HK2,MDH2,PGK1,PKLR,PKM,ALDOA,ALDOC,GBE1,GOT2,GPI,GYG1,ENO1
1270135	Purine ribonucleoside monophosphate biosynthesis	BioSystems: REACTOME	3.59e-05	0.07558	0.002362	0.01944	5	12	PFAS,PPAT,PAICS,ATIC,IMPDH2
1270122	Pyruvate metabolism and Citric Acid (TCA) cycle	BioSystems: REACTOME	4.88e-05	0.1027	0.003113	0.02562	9	49	PDK1,ACO2,MDH2,FH,IDH3A,SLC16A1,DLAT,LDHA,LDHB
SMP00040	Glycolysis	SMPDB	5.664e-05	0.1192	0.003507	0.02886	5	13	HK2,PGK1,PKM,ALDOA,GPI
PW:0000640	glycolysis pathway	Pathway Ontology	6.752e-05	0.1421	0.004026	0.03313	6	21	HK2,PGK1,PKLR,PKM,ALDOA,ENO1
PW:0000043	pyruvate metabolic	Pathway Ontology	6.886e-05	0.1449	0.004026	0.03313	7	30	PDK1,MDH2,PKLR,PKM,DLAT,LDHA,LDHB
1269961	Gluconeogenesis	BioSystems: REACTOME	0.000107	0.2253	0.00609	0.05012	7	32	MDH2,PGK1,ALDOA,ALDOC,GOT2,GPI,ENO1
782396	glycolysis	BioSystems: BIOCYC	0.0001246	0.2622	0.006901	0.05679	5	15	PGK1,PKLR,PKM,ALDOA,ALDOC
82944	Purine metabolism	BioSystems: KEGG	0.0001677	0.3529	0.008738	0.07191	17	175	PDE3B,NME1-NME2,PFAS,ADCY7,PNPT1,PKLR,PKM,AK2,POLR1B,POLR1C,PPAT,PAICS,POLR3B,NT5C2,ATIC,IMPDH2,TWISTNB
PW:0000049	cysteine metabolic	Pathway Ontology	0.0001728	0.3638	0.008738	0.07191	4	9	CTH,GOT2,LDHA,LDHB
MAP00272_Cysteine_metabolism	MAP00272 Cysteine metabolism	GenMAPP	0.0001728	0.3638	0.008738	0.07191	4	9	CTH,GOT2,LDHA,LDHB
PW:0000063	glyoxylate and dicarboxylate metabolic	Pathway Ontology	0.0001743	0.367	0.008738	0.07191	3	4	ACO2,MDH2,MTHFD1
169350	Signaling events mediated by TCPTP	BioSystems: Pathway Interaction Database	0.0002348	0.4942	0.01149	0.09457	7	36	PIK3R1,ATR,STAT3,STAT5A,KPNB1,GRB2,LMAN1
M15109	Glycolysis Pathway	MSigDB C2 BIOCARTA (v6.0)	0.00028	0.5893	0.0131	0.1078	4	10	PGK1,PKLR,GPI,ENO1
M5374	The SARS-coronavirus Life Cycle	MSigDB C2 BIOCARTA (v6.0)	0.00028	0.5893	0.0131	0.1078	4	10	FBL,NCL,LDHA,LDHB
MAP00020_Citrate_cycle_TCA_cycle	MAP00020 Citrate cycle TCA cycle	GenMAPP	0.0003253	0.6848	0.01457	0.1199	5	18	ACLY,ACO2,MDH2,FH,IDH3A
SMP00057	Citric Acid Cycle	SMPDB	0.0003253	0.6848	0.01457	0.1199	5	18	ACO2,MDH2,FH,IDH3A,DLAT
1270420	Detoxification of Reactive Oxygen Species	BioSystems: REACTOME	0.0003338	0.7026	0.01464	0.1205	7	38	TXN,PRDX5,ERO1A,CYBB,GSR,GSTP1,PRDX1
1269365	Response to elevated platelet cytosolic Ca2+	BioSystems: REACTOME	0.0003701	0.7791	0.0159	0.1308	14	137	APOOL,CD109,PFN1,TAGLN2,PLEK,ALDOA,FLNA,ANXA5,APP,FAM49B,PRKCA,PROS1,THBS1,TIMP3
1270121	The citric acid (TCA) cycle and respiratory electron transport	BioSystems: REACTOME	0.0003959	0.8334	0.01667	0.1372	16	171	PDK1,ACO2,MDH2,FH,COX6A1,IDH3A,SLC16A1,ATP5MC1,NDUFA9,DLAT,COX18,LDHA,LDHB,LRPPRC,TRAP1,NDUFAF1
1339157	Response to metal ions	BioSystems: REACTOME	0.0004276	0.9001	0.01703	0.1401	4	11	MT1G,MT1H,MT1X,MT2A
1339158	Metallothioneins bind metals	BioSystems: REACTOME	0.0004276	0.9001	0.01703	0.1401	4	11	MT1G,MT1H,MT1X,MT2A
SMP00128	Gluconeogenesis	SMPDB	0.0004287	0.9025	0.01703	0.1401	5	19	HK2,MDH2,PGK1,ALDOA,GPI
138068	Signaling events mediated by Stem cell factor receptor (c-Kit)	BioSystems: Pathway Interaction Database	0.0004584	0.965	0.01787	0.1471	8	52	PIK3R1,STAP1,STAT3,STAT5A,GRB2,CBL,SPRED1,LYN
82927	Citrate cycle (TCA cycle)	BioSystems: KEGG	0.000563	1	0.02116	0.1741	6	30	ACLY,ACO2,MDH2,FH,IDH3A,DLAT
P02738	De novo purine biosynthesis	PantherDB	0.000563	1	0.02116	0.1741	6	30	NME1-NME2,PFAS,AK2,PPAT,ATIC,IMPDH2
138071	PDGFR-beta signaling pathway	BioSystems: Pathway Interaction Database	0.0005957	1	0.022	0.181	8	54	PIK3R1,MYC,STAT3,STAT5A,PTPRJ,GRB2,CBL,LYN
413341	Glycolysis, core module involving three-carbon compounds	BioSystems: KEGG	0.0006235	1	0.02263	0.1862	4	12	PGK1,PKLR,PKM,ENO1
1270133	Metabolism of nucleotides	BioSystems: REACTOME	0.0006462	1	0.02305	0.1897	11	97	PFAS,TXN,AK2,UMPS,PPAT,PAICS,NT5C2,ATIC,IMPDH2,ENTPD7,GSR
MAP00230_Purine_metabolism	MAP00230 Purine metabolism	GenMAPP	0.0007694	1	0.02699	0.2221	10	84	PFAS,ADCY7,PKLR,PKM,AK2,POLR1B,PPAT,PAICS,ATIC,IMPDH2
P00024	Glycolysis	PantherDB	0.0008259	1	0.0285	0.2346	3	6	PGK1,ALDOA,ENO1
1269367	Platelet degranulation	BioSystems: REACTOME	0.0008436	1	0.02864	0.2357	13	132	APOOL,CD109,PFN1,TAGLN2,PLEK,ALDOA,FLNA,ANXA5,APP,FAM49B,PROS1,THBS1,TIMP3
618581	Guanine ribonucleotide biosynthesis IMP => GDP,GTP	BioSystems: KEGG	0.0008754	1	0.02925	0.2407	4	13	NME1-NME2,PKLR,PKM,IMPDH2
695200	HIF-1 signaling pathway	BioSystems: KEGG	0.0009094	1	0.02991	0.2461	11	101	HK2,PDK1,PGK1,PIK3R1,ALDOA,EGLN1,PRKCA,CYBB,STAT3,LDHA,ENO1
782000	Proteoglycans in cancer	BioSystems: KEGG	0.0009429	1	0.03053	0.2513	17	203	PIK3R1,MMP9,FLNA,MSN,PRKCA,MYC,ITGA5,ITGAV,PDCD4,STAT3,IQGAP1,FZD3,GRB2,CBL,THBS1,TIMP3,HCLS1
1270134	Purine metabolism	BioSystems: REACTOME	0.001131	1	0.03606	0.2968	6	34	PFAS,PPAT,PAICS,NT5C2,ATIC,IMPDH2
1268838	Organelle biogenesis and maintenance	BioSystems: REACTOME	0.001161	1	0.03648	0.3002	24	341	CCT3,MRPL12,MRPS35,TUFM,MRPL35,ALAS1,MRPS28,MRPL58,MRPL15,MRPS15,MRPS23,CCT8,MRPL40,GFM1,MRPL11,MRPS27,MRPL16,ERAL1,CHCHD1,TNPO1,TFAM,MRPL2,MRPL4,MRPS7
142273	inosine-5'-phosphate biosynthesis	BioSystems: BIOCYC	0.001312	1	0.04001	0.3293	2	2	PAICS,ATIC
142451	lactate fermentation (reoxidation of cytosolic NADH)	BioSystems: BIOCYC	0.001312	1	0.04001	0.3293	2	2	LDHA,LDHB
M11520	TPO Signaling Pathway	MSigDB C2 BIOCARTA (v6.0)	0.001353	1	0.04012	0.3301	5	24	PIK3R1,PRKCA,STAT3,STAT5A,GRB2
MAP00051_Fructose_and_mannose_metabolism	MAP00051 Fructose and mannose metabolism	GenMAPP	0.001353	1	0.04012	0.3301	5	24	HK2,ALDOA,ALDOC,MPI,SORD
MAP00720_Reductive_carboxylate_cycle_CO2_fixation	MAP00720 Reductive carboxylate cycle CO2 fixation	GenMAPP	0.001407	1	0.04114	0.3386	3	7	ACO2,MDH2,FH
82952	Valine, leucine and isoleucine degradation	BioSystems: KEGG	0.001434	1	0.04135	0.3403	7	48	ABAT,HMGCS1,ACAA2,ALDH1B1,BCAT1,BCKDHB,MCCC2
1268745	Mitochondrial protein import	BioSystems: REACTOME	0.001511	1	0.04298	0.3537	8	62	ACO2,TOMM5,TOMM40,VDAC1,GRPEL1,TIMM50,ATP5MC1,PMPCA
782382	gluconeogenesis	BioSystems: BIOCYC	0.001579	1	0.04432	0.3648	4	15	MDH2,PGK1,ALDOA,ALDOC
PW:0000048	methionine cycle/metabolic	Pathway Ontology	0.001643	1	0.0455	0.3744	5	25	PRMT5,AHCY,PNMT,MTR,CTH

## Sheet: pathway_AB
ID	Name	Source	p-value	q-value Bonferroni	q-value FDR B&H	q-value FDR B&Y	Hit Count in Query List	Hit Count in Genome	Hit in Query List
83122	Systemic lupus erythematosus	BioSystems: KEGG	1.774e-06	0.00219	0.00219	0.01686	11	133	HLA-DRB1,HIST1H2AK,HIST1H2AJ,HIST1H2AM,HIST1H3A,HIST1H3C,FCGR2A,HIST1H3B,HIST1H4A,H2AFY,HIST1H2AD
1270225	Erythrocytes take up oxygen and release carbon dioxide	BioSystems: REACTOME	3.824e-06	0.004723	0.002361	0.01817	4	9	CA1,CA2,AQP1,HBB
1270439	RMTs methylate histone arginines	BioSystems: REACTOME	1.075e-05	0.01328	0.003845	0.0296	8	79	HIST1H2AK,HIST1H2AJ,HIST1H2AM,HIST1H3A,HIST1H3C,HIST1H3B,HIST1H4A,HIST1H2AD
137972	Signaling events mediated by HDAC Class III	BioSystems: Pathway Interaction Database	1.246e-05	0.01538	0.003845	0.0296	6	39	TUBB2A,KAT2B,HIST1H4A,FHL2,FOXO1,FOXO3
1270224	Erythrocytes take up carbon dioxide and release oxygen	BioSystems: REACTOME	2.08e-05	0.02569	0.004282	0.03295	4	13	CA1,CA2,AQP1,HBB
1270223	O2/CO2 exchange in erythrocytes	BioSystems: REACTOME	2.08e-05	0.02569	0.004282	0.03295	4	13	CA1,CA2,AQP1,HBB
1269656	RNA Polymerase I, RNA Polymerase III, and Mitochondrial Transcription	BioSystems: REACTOME	3.738e-05	0.04617	0.005968	0.04593	10	151	HIST1H2AJ,KAT2B,HIST1H3A,HIST1H3C,NFIA,HIST1H3B,HIST1H4A,NFIC,NFIX,HIST1H2AD
1270436	HDACs deacetylate histones	BioSystems: REACTOME	3.866e-05	0.04775	0.005968	0.04593	8	94	HIST1H2AK,HIST1H2AJ,HIST1H2AM,HIST1H3A,HIST1H3C,HIST1H3B,HIST1H4A,HIST1H2AD
1270428	Oxidative Stress Induced Senescence	BioSystems: REACTOME	5.437e-05	0.06715	0.007461	0.05743	9	127	CDKN2C,MAP3K5,HIST1H2AJ,HIST1H3A,HIST1H3C,HIST1H3B,HIST1H4A,CBX4,HIST1H2AD
1270435	HATs acetylate histones	BioSystems: REACTOME	0.0001361	0.1681	0.01657	0.1275	9	143	HIST1H2AK,HIST1H2AJ,HIST1H2AM,KAT2B,HIST1H3A,HIST1H3C,HIST1H3B,HIST1H4A,HIST1H2AD
1427865	Metalloprotease DUBs	BioSystems: REACTOME	0.0001476	0.1822	0.01657	0.1275	5	38	HIST1H2AK,HIST1H2AJ,HIST1H2AM,KAT2B,HIST1H2AD
585563	Alcoholism	BioSystems: KEGG	0.0001629	0.2012	0.01677	0.129	10	180	HIST1H2AK,HIST1H2AJ,HIST1H2AM,HIST1H3A,HIST1H3C,HIST1H3B,HIST1H4A,H2AFY,SLC18A2,HIST1H2AD
413369	Glycosphingolipid biosynthesis, globo-series, LacCer => Gb4Cer	BioSystems: KEGG	0.0001835	0.2266	0.01743	0.1342	2	2	B3GALNT1,A4GALT
1269659	RNA Polymerase I Promoter Opening	BioSystems: REACTOME	0.0002167	0.2676	0.01912	0.1471	6	64	HIST1H2AJ,HIST1H3A,HIST1H3C,HIST1H3B,HIST1H4A,HIST1H2AD
1269740	DNA methylation	BioSystems: REACTOME	0.0002568	0.3172	0.02115	0.1627	6	66	HIST1H2AJ,HIST1H3A,HIST1H3C,HIST1H3B,HIST1H4A,HIST1H2AD
1339126	B-WICH complex positively regulates rRNA expression	BioSystems: REACTOME	0.0002747	0.3393	0.02121	0.1632	7	94	HIST1H2AJ,KAT2B,HIST1H3A,HIST1H3C,HIST1H3B,HIST1H4A,HIST1H2AD
1269513	Activated PKN1 stimulates transcription of AR (androgen receptor) regulated genes KLK2 and KLK3	BioSystems: REACTOME	0.0003026	0.3737	0.02198	0.1692	6	68	HIST1H2AJ,HIST1H3A,HIST1H3C,HIST1H3B,HIST1H4A,HIST1H2AD
1270426	Cellular Senescence	BioSystems: REACTOME	0.0003377	0.417	0.02305	0.1774	10	197	CDKN2C,MAP3K5,HIST1H2AJ,HIST1H3A,HIST1H3C,HIST1H3B,HIST1H4A,CBX4,HIST1H1B,HIST1H2AD
1269738	SIRT1 negatively regulates rRNA Expression	BioSystems: REACTOME	0.0003545	0.4379	0.02305	0.1774	6	70	HIST1H2AJ,HIST1H3A,HIST1H3C,HIST1H3B,HIST1H4A,HIST1H2AD
1269735	PRC2 methylates histones and DNA	BioSystems: REACTOME	0.0005151	0.6362	0.03029	0.2332	6	75	HIST1H2AJ,HIST1H3A,HIST1H3C,HIST1H3B,HIST1H4A,HIST1H2AD
1269813	Condensation of Prophase Chromosomes	BioSystems: REACTOME	0.0005151	0.6362	0.03029	0.2332	6	75	HIST1H2AJ,HIST1H3A,HIST1H3C,HIST1H3B,HIST1H4A,HIST1H2AD
1383084	ERCC6 (CSB) and EHMT2 (G9a) positively regulate rRNA expression	BioSystems: REACTOME	0.0005933	0.7327	0.0333	0.2563	6	77	HIST1H2AJ,HIST1H3A,HIST1H3C,HIST1H3B,HIST1H4A,HIST1H2AD
1270437	HDMs demethylate histones	BioSystems: REACTOME	0.0006563	0.8105	0.03444	0.2651	5	52	HIST1H3A,HIST1H3C,HIST1H3B,HIST1H4A,UTY
1339125	Positive epigenetic regulation of rRNA expression	BioSystems: REACTOME	0.0006756	0.8344	0.03444	0.2651	7	109	HIST1H2AJ,KAT2B,HIST1H3A,HIST1H3C,HIST1H3B,HIST1H4A,HIST1H2AD
523016	Transcriptional misregulation in cancer	BioSystems: KEGG	0.0007456	0.9208	0.03444	0.2651	9	180	CDKN2C,BCL2L1,CDK14,DDIT3,HIST1H3A,HIST1H3C,HIST1H3B,UTY,FOXO1
1269658	RNA Polymerase I Promoter Clearance	BioSystems: REACTOME	0.000753	0.9299	0.03444	0.2651	7	111	HIST1H2AJ,KAT2B,HIST1H3A,HIST1H3C,HIST1H3B,HIST1H4A,HIST1H2AD
1270431	Senescence-Associated Secretory Phenotype (SASP)	BioSystems: REACTOME	0.000753	0.9299	0.03444	0.2651	7	111	CDKN2C,HIST1H2AJ,HIST1H3A,HIST1H3C,HIST1H3B,HIST1H4A,HIST1H2AD
1269657	RNA Polymerase I Transcription	BioSystems: REACTOME	0.0008372	1	0.03693	0.2842	7	113	HIST1H2AJ,KAT2B,HIST1H3A,HIST1H3C,HIST1H3B,HIST1H4A,HIST1H2AD
1144995	Sphingolipid signaling pathway	BioSystems: KEGG	0.001081	1	0.04602	0.3542	7	118	MAP3K5,SGPP1,FCER1A,MS4A2,SPTLC2,PPP2R5B,MAP2K2

## Sheet: GO_BP_FL
ID	Name	p-value	q-value Bonferroni	q-value FDR B&H	q-value FDR B&Y	Hit Count in Query List	Hit Count in Genome	Hit in Query List
GO:0022613	ribonucleoprotein complex biogenesis	6.67e-23	3.897e-19	3.897e-19	3.605e-18	63	468	NOLC1,GTPBP4,FBL,MRM1,RPS23,NUFIP1,UTP15,PRMT5,EIF3M,XRN2,WDR36,NOP16,NOB1,GEMIN5,CHD7,DIS3,NOP14,CELF2,TSR1,PDCD11,WDR12,EIF3G,EIF3I,SNRPC,SNRPD1,MRPL11,ATR,RRP1B,RSL1D1,BMS1,MAK16,PNO1,NCL,WDR43,WDR3,DIMT1,CDC123,ERAL1,RRS1,FAM103A1,C1QBP,PRPF19,UTP20,EBNA1BP2,NOP2,GNL3,RIOK1,EXOSC3,HEATR1,SRFBP1,DICER1,SDAD1,MRPS7,GEMIN7,UTP11,EIF2S3,UTP4,PES1,NAT10,OGFOD1,MRTO4,LTV1,DDX21
GO:0042254	ribosome biogenesis	5.327e-18	3.112e-14	1.556e-14	1.44e-13	46	322	NOLC1,GTPBP4,FBL,MRM1,RPS23,UTP15,XRN2,WDR36,NOP16,NOB1,CHD7,DIS3,NOP14,TSR1,PDCD11,WDR12,MRPL11,RRP1B,RSL1D1,BMS1,MAK16,PNO1,NCL,WDR43,WDR3,DIMT1,ERAL1,RRS1,C1QBP,UTP20,EBNA1BP2,NOP2,GNL3,RIOK1,EXOSC3,HEATR1,SRFBP1,SDAD1,MRPS7,UTP11,UTP4,PES1,NAT10,MRTO4,LTV1,DDX21
GO:0034660	ncRNA metabolic process	1.933e-17	1.129e-13	3.764e-14	3.482e-13	61	563	NOLC1,UBA5,GTPBP4,FBL,MRM1,RPS23,WARS2,LRRC47,PNPT1,UTP15,POLR1B,PUS7,XRN2,TYW3,WDR36,RTCB,LIN28B,NOB1,TRMT1,CHD7,PPA1,DIS3,TRUB2,IARS2,TRMT6,NOP14,TSR1,INTS13,PDCD11,INTS9,WDR12,RRP1B,RSL1D1,BMS1,MAK16,PNO1,DARS,NCL,NSUN2,WDR43,WDR3,DIMT1,RRS1,UTP20,EBNA1BP2,NOP2,RIOK1,EXOSC3,GATC,HEATR1,SRFBP1,DICER1,GTF3A,UTP11,UTP4,PES1,NAT10,MRTO4,LTV1,DDX21,QRSL1
GO:0034470	ncRNA processing	4.866e-17	2.843e-13	7.108e-14	6.575e-13	50	399	NOLC1,UBA5,GTPBP4,FBL,MRM1,RPS23,UTP15,PUS7,XRN2,TYW3,WDR36,RTCB,LIN28B,NOB1,TRMT1,CHD7,DIS3,TRUB2,TRMT6,NOP14,TSR1,PDCD11,INTS9,WDR12,RRP1B,RSL1D1,BMS1,MAK16,PNO1,NCL,NSUN2,WDR43,WDR3,DIMT1,RRS1,UTP20,EBNA1BP2,NOP2,RIOK1,EXOSC3,HEATR1,SRFBP1,DICER1,UTP11,UTP4,PES1,NAT10,MRTO4,LTV1,DDX21
GO:0016072	rRNA metabolic process	1.58e-16	9.233e-13	1.847e-13	1.708e-12	40	267	NOLC1,GTPBP4,FBL,MRM1,RPS23,UTP15,XRN2,WDR36,NOB1,CHD7,DIS3,NOP14,TSR1,PDCD11,WDR12,RRP1B,RSL1D1,BMS1,MAK16,PNO1,NCL,WDR43,WDR3,DIMT1,RRS1,UTP20,EBNA1BP2,NOP2,RIOK1,EXOSC3,HEATR1,SRFBP1,DICER1,UTP11,UTP4,PES1,NAT10,MRTO4,LTV1,DDX21
GO:0006364	rRNA processing	3.659e-16	2.138e-12	3.563e-13	3.296e-12	39	260	NOLC1,GTPBP4,FBL,MRM1,RPS23,UTP15,XRN2,WDR36,NOB1,CHD7,DIS3,NOP14,TSR1,PDCD11,WDR12,RRP1B,RSL1D1,BMS1,MAK16,PNO1,NCL,WDR43,WDR3,DIMT1,RRS1,UTP20,EBNA1BP2,NOP2,RIOK1,EXOSC3,HEATR1,SRFBP1,UTP11,UTP4,PES1,NAT10,MRTO4,LTV1,DDX21
GO:1901566	organonitrogen compound biosynthetic process	2.593e-14	1.515e-10	2.165e-11	2.003e-10	100	1444	GPHN,RIDA,RFK,ABAT,MRPL12,PARK7,IMPACT,MRPS35,PFAS,RPS23,WARS2,ADCY7,TUFM,MRPL35,FABP5,LRRC47,EFTUD2,S100A9,SLC25A32,GUF1,MGST1,AHCY,PKLR,PKM,AK2,UMPS,ALAS1,ALDOA,GSTO1,SLC25A17,EIF3M,NSMAF,SYNCRIP,MRPS28,PNMT,LIN28B,SLC25A33,MRPL58,PPA1,PPAT,APP,PAICS,IGF2BP1,IGF2BP3,IARS2,MRPL15,MTHFD1,HS2ST1,VCAN,MRPS15,MRPS23,MTR,EIF5B,PRKCA,MRPL40,CTH,ATIC,EIF3G,EIF3I,GFM1,MRPL11,MYC,ATP5MC1,SPTSSA,IMPDH2,RS…
GO:0006412	translation	1.749e-13	1.022e-09	1.277e-10	1.181e-09	60	667	RIDA,MRPL12,IMPACT,MRPS35,RPS23,WARS2,TUFM,MRPL35,LRRC47,EFTUD2,S100A9,SLC25A32,GUF1,SLC25A17,EIF3M,SYNCRIP,MRPS28,LIN28B,SLC25A33,MRPL58,PPA1,APP,IGF2BP1,IGF2BP3,IARS2,MRPL15,MRPS15,MRPS23,EIF5B,PRKCA,MRPL40,EIF3G,EIF3I,GFM1,MRPL11,RSL1D1,MRPS27,DARS,STAT3,METAP1,MRPL16,CDC123,EIF2B3,DHPS,C1QBP,PUM3,CHCHD1,GATC,DICER1,MRPL2,MRPL4,MRPS7,LRPPRC,THBS1,TRAP1,EIF1AX,EIF2S3,OGFOD1,MRTO4,QRSL1
GO:0043603	cellular amide metabolic process	2.222e-13	1.298e-09	1.442e-10	1.334e-09	78	1023	RIDA,MRPL12,IMPACT,MRPS35,RPS23,WARS2,TUFM,MRPL35,LRRC47,EFTUD2,S100A9,SLC25A32,GUF1,MGST1,MIPEP,GSTO1,SLC25A17,EIF3M,NAXE,NSMAF,SYNCRIP,MRPS28,LIN28B,SLC25A33,MRPL58,PPA1,APP,IGF2BP1,IGF2BP3,IARS2,MRPL15,MTHFD1,MRPS15,MRPS23,MTR,EIF5B,PRKCA,MRPL40,CTH,ATIC,EIF3G,EIF3I,GFM1,CTSG,MRPL11,PROS1,SPTSSA,RSL1D1,MRPS27,DARS,MCCC2,STAT3,STAT5A,METAP1,MRPL16,CDC123,EIF2B3,DHPS,C1QBP,PUM3,CHCHD1,GATC,DICER…
GO:0006518	peptide metabolic process	2.877e-13	1.681e-09	1.681e-10	1.555e-09	69	847	RIDA,MRPL12,IMPACT,MRPS35,RPS23,WARS2,TUFM,MRPL35,LRRC47,EFTUD2,S100A9,SLC25A32,GUF1,MGST1,MIPEP,GSTO1,SLC25A17,EIF3M,SYNCRIP,MRPS28,LIN28B,SLC25A33,MRPL58,PPA1,APP,IGF2BP1,IGF2BP3,IARS2,MRPL15,MRPS15,MRPS23,EIF5B,PRKCA,MRPL40,CTH,EIF3G,EIF3I,GFM1,CTSG,MRPL11,PROS1,RSL1D1,MRPS27,DARS,STAT3,METAP1,MRPL16,CDC123,EIF2B3,DHPS,C1QBP,PUM3,CHCHD1,GATC,DICER1,GSR,MRPL2,MRPL4,GSTP1,MRPS7,LRPPRC,THBS1,TRAP…
GO:0007005	mitochondrion organization	7.84e-13	4.581e-09	4.165e-10	3.852e-09	64	767	HK2,MRPL12,PDK1,PARK7,APOOL,OBSCN,MRPS35,TOMM5,TUFM,MRPL35,PHB,PNPT1,MIPEP,ACAA2,ALAS1,TOMM40,MMP9,HSPA4,VDAC1,MRPS28,SLC25A33,ANXA5,MRPL58,ZCCHC17,YWHAB,THEM4,MRPL15,TIMM50,MRPS15,MRPS23,MRPL40,ATP1B1,GFM1,SNRPD1,MRPL11,MYC,MRPS27,STARD7,NDUFA9,STAT3,BNIP3,PMPCA,MRPL16,SUPV3L1,C1QBP,CHCHD1,CLUH,FAM162A,AGTPBP1,HIGD2A,GATC,COX18,TFAM,PPIF,MRPL2,MRPL4,MRPS7,LRPPRC,OXA1L,NDUFAF1,PDCD5,WDR45B,SLIRP,…
GO:0043043	peptide biosynthetic process	1.094e-12	6.395e-09	5.325e-10	4.926e-09	60	696	RIDA,MRPL12,IMPACT,MRPS35,RPS23,WARS2,TUFM,MRPL35,LRRC47,EFTUD2,S100A9,SLC25A32,GUF1,SLC25A17,EIF3M,SYNCRIP,MRPS28,LIN28B,SLC25A33,MRPL58,PPA1,APP,IGF2BP1,IGF2BP3,IARS2,MRPL15,MRPS15,MRPS23,EIF5B,PRKCA,MRPL40,EIF3G,EIF3I,GFM1,MRPL11,RSL1D1,MRPS27,DARS,STAT3,METAP1,MRPL16,CDC123,EIF2B3,DHPS,C1QBP,PUM3,CHCHD1,GATC,DICER1,MRPL2,MRPL4,MRPS7,LRPPRC,THBS1,TRAP1,EIF1AX,EIF2S3,OGFOD1,MRTO4,QRSL1
GO:0006396	RNA processing	1.185e-12	6.923e-09	5.325e-10	4.926e-09	71	913	NOLC1,UBA5,GTPBP4,FBL,MRM1,RPS23,NUFIP1,EFTUD2,PNPT1,UTP15,PIK3R1,PRMT5,PUS7,SYNCRIP,XRN2,TYW3,WDR36,RTCB,LIN28B,NOB1,TRMT1,GEMIN5,CHD7,APP,DIS3,TRUB2,TRMT6,NOP14,CELF2,TSR1,PPIL1,PDCD11,INTS9,WDR12,SNRPC,SNRPD1,DHX36,RRP1B,RSL1D1,BMS1,MAK16,PNO1,NCL,NSUN2,WDR43,WDR3,DIMT1,RRS1,SUPV3L1,FAM103A1,C1QBP,PRPF19,UTP20,EBNA1BP2,NOP2,HNRNPDL,RIOK1,EXOSC3,HEATR1,RBM28,SRFBP1,DICER1,GEMIN7,UTP11,UTP4,RAVE…
GO:0043604	amide biosynthetic process	1.656e-12	9.674e-09	6.91e-10	6.392e-09	64	780	RIDA,MRPL12,IMPACT,MRPS35,RPS23,WARS2,TUFM,MRPL35,LRRC47,EFTUD2,S100A9,SLC25A32,GUF1,SLC25A17,EIF3M,NSMAF,SYNCRIP,MRPS28,LIN28B,SLC25A33,MRPL58,PPA1,APP,IGF2BP1,IGF2BP3,IARS2,MRPL15,MTHFD1,MRPS15,MRPS23,EIF5B,PRKCA,MRPL40,ATIC,EIF3G,EIF3I,GFM1,MRPL11,SPTSSA,RSL1D1,MRPS27,DARS,STAT3,METAP1,MRPL16,CDC123,EIF2B3,DHPS,C1QBP,PUM3,CHCHD1,GATC,DICER1,MRPL2,MRPL4,MRPS7,LRPPRC,THBS1,TRAP1,EIF1AX,EIF2S3,OG…
GO:0032543	mitochondrial translation	1.949e-11	1.139e-07	7.591e-09	7.022e-08	22	120	MRPL12,MRPS35,TUFM,MRPL35,MRPS28,MRPL58,MRPL15,MRPS15,MRPS23,MRPL40,GFM1,MRPL11,MRPS27,MRPL16,C1QBP,CHCHD1,GATC,MRPL2,MRPL4,MRPS7,LRPPRC,QRSL1
GO:0006732	coenzyme metabolic process	2.453e-11	1.433e-07	8.957e-09	8.285e-08	37	333	GPHN,RFK,HK2,PDK1,ACOT9,ACLY,MDH2,ME2,PGK1,SLC25A32,SCD,AHCY,PKLR,PKM,ACAA2,PRDX5,ALDOA,ALDOC,MPI,IDH3A,THEM4,FAR2,MTHFD1,MTR,ATIC,MYC,MCCC2,NDUFA9,STAT3,DLAT,GPI,LDHA,LDHB,NAMPT,TKT,QPRT,ENO1
GO:0019752	carboxylic acid metabolic process	9.137e-11	5.339e-07	3.14e-08	2.905e-07	71	1003	ABAT,HK2,PDK1,ACLY,ACO2,PARK7,PFAS,MDH2,ME2,PGK1,WARS2,LRRC47,FAH,SLC25A32,ACSM3,SCD,HPGD,AHCY,PKLR,LYPLA1,PKM,ACAA2,FH,ALDOA,ALDOC,GSTO1,SLC25A17,ALOX12,MPI,HACD3,ERO1A,EGLN1,PPA1,IDH3A,PPAT,CPT2,PNKD,SLC2A3,IARS2,THEM4,SLC16A1,MTHFD1,VCAN,MTR,CTH,ATIC,SORD,MYC,PSMB2,PSMC4,BCAT1,DARS,BCKDHB,MCCC2,PHGDH,STAT3,STAT5A,HPGDS,GLUD2,DHPS,DLAT,GOT2,SLC27A2,GPI,GATC,LDHA,LDHB,QPRT,PSME3,ENO1,QRSL1
GO:0070125	mitochondrial translational elongation	1.103e-10	6.447e-07	3.582e-08	3.313e-07	18	85	MRPL12,MRPS35,TUFM,MRPL35,MRPS28,MRPL58,MRPL15,MRPS15,MRPS23,MRPL40,GFM1,MRPL11,MRPS27,MRPL16,CHCHD1,MRPL2,MRPL4,MRPS7
GO:0006082	organic acid metabolic process	5.154e-10	3.012e-06	1.585e-07	1.466e-06	75	1131	ABAT,HK2,PDK1,ACLY,ACO2,PARK7,PFAS,MDH2,ME2,PGK1,WARS2,LRRC47,FAH,SLC25A32,ACSM3,SCD,HPGD,AHCY,PKLR,LYPLA1,PKM,ACAA2,ABCG2,FH,ALDOA,ALDOC,GSTO1,SLC25A17,ALOX12,MPI,MPO,HACD3,ERO1A,EGLN1,PPA1,IDH3A,PPAT,CPT2,PNKD,SLC2A3,IARS2,THEM4,SLC16A1,MTHFD1,HS2ST1,VCAN,MTR,CTH,ATIC,SORD,MYC,PSMB2,PSMC4,BCAT1,DARS,BCKDHB,MCCC2,PHGDH,STAT3,STAT5A,HPGDS,GLUD2,DHPS,DLAT,GOT2,SLC27A2,GPI,SLC16A9,GATC,LDHA,LDHB,QP…
GO:0043436	oxoacid metabolic process	1.515e-09	8.851e-06	4.257e-07	3.938e-06	73	1114	ABAT,HK2,PDK1,ACLY,ACO2,PARK7,PFAS,MDH2,ME2,PGK1,WARS2,LRRC47,FAH,SLC25A32,ACSM3,SCD,HPGD,AHCY,PKLR,LYPLA1,PKM,ACAA2,FH,ALDOA,ALDOC,GSTO1,SLC25A17,ALOX12,MPI,MPO,HACD3,ERO1A,EGLN1,PPA1,IDH3A,PPAT,CPT2,PNKD,SLC2A3,IARS2,THEM4,SLC16A1,MTHFD1,HS2ST1,VCAN,MTR,CTH,ATIC,SORD,MYC,PSMB2,PSMC4,BCAT1,DARS,BCKDHB,MCCC2,PHGDH,STAT3,STAT5A,HPGDS,GLUD2,DHPS,DLAT,GOT2,SLC27A2,GPI,GATC,LDHA,LDHB,QPRT,PSME3,ENO1,…
GO:0006415	translational termination	1.53e-09	8.94e-06	4.257e-07	3.938e-06	18	99	RIDA,MRPL12,MRPS35,MRPL35,MRPS28,MRPL58,MRPL15,MRPS15,MRPS23,MRPL40,MRPL11,MRPS27,MRPL16,CHCHD1,MRPL2,MRPL4,MRPS7,OGFOD1
GO:0051186	cofactor metabolic process	2.373e-09	1.386e-05	6.302e-07	5.83e-06	38	409	GPHN,RFK,HK2,PDK1,ACOT9,ACLY,MDH2,ME2,PGK1,SLC25A32,SCD,AHCY,PKLR,PKM,ACAA2,ALAS1,PRDX5,ALDOA,ALDOC,MPI,IDH3A,THEM4,FAR2,MTHFD1,MTR,ATIC,MYC,MCCC2,NDUFA9,STAT3,DLAT,GPI,LDHA,LDHB,NAMPT,TKT,QPRT,ENO1
GO:0072524	pyridine-containing compound metabolic process	3.18e-09	1.858e-05	8.077e-07	7.472e-06	22	155	HK2,MDH2,ME2,PGK1,PKLR,PKM,PRDX5,ALDOA,ALDOC,NAXE,MPI,IDH3A,MYC,STAT3,DLAT,GPI,LDHA,LDHB,NAMPT,TKT,QPRT,ENO1
GO:0006733	oxidoreduction coenzyme metabolic process	4.582e-09	2.677e-05	1.094e-06	1.012e-05	22	158	HK2,MDH2,ME2,PGK1,PKLR,PKM,PRDX5,ALDOA,ALDOC,MPI,IDH3A,MYC,NDUFA9,STAT3,DLAT,GPI,LDHA,LDHB,NAMPT,TKT,QPRT,ENO1
GO:0019362	pyridine nucleotide metabolic process	5.011e-09	2.928e-05	1.094e-06	1.012e-05	21	145	HK2,MDH2,ME2,PGK1,PKLR,PKM,PRDX5,ALDOA,ALDOC,MPI,IDH3A,MYC,STAT3,DLAT,GPI,LDHA,LDHB,NAMPT,TKT,QPRT,ENO1
GO:0046496	nicotinamide nucleotide metabolic process	5.011e-09	2.928e-05	1.094e-06	1.012e-05	21	145	HK2,MDH2,ME2,PGK1,PKLR,PKM,PRDX5,ALDOA,ALDOC,MPI,IDH3A,MYC,STAT3,DLAT,GPI,LDHA,LDHB,NAMPT,TKT,QPRT,ENO1
GO:0044283	small molecule biosynthetic process	5.057e-09	2.955e-05	1.094e-06	1.012e-05	46	572	RFK,ABAT,ACLY,PARK7,HMGCS1,MDH2,PGK1,FABP5,ACSM3,SCD,AHCY,PKLR,PKM,ACAA2,PLEK,ALDOA,ALDOC,GSTO1,ALOX12,MPO,HSD17B7,HACD3,MTHFD1,VCAN,NUS1,MTR,CTH,ATIC,SORD,BCAT1,NDUFA9,PHGDH,PHOSPHO1,SDHAF3,HPGDS,DHCR24,GLUD2,DHPS,GOT2,SLC27A2,GPI,LDHA,LDHB,TKT,SLC35B4,ENO1
GO:0019674	NAD metabolic process	6.767e-09	3.954e-05	1.38e-06	1.276e-05	14	63	HK2,MDH2,PGK1,PKLR,PKM,ALDOA,ALDOC,IDH3A,GPI,LDHA,LDHB,NAMPT,QPRT,ENO1
GO:0006414	translational elongation	6.848e-09	4.002e-05	1.38e-06	1.276e-05	20	134	MRPL12,MRPS35,TUFM,MRPL35,MRPS28,MRPL58,IARS2,MRPL15,MRPS15,MRPS23,MRPL40,GFM1,MRPL11,MRPS27,MRPL16,CHCHD1,GATC,MRPL2,MRPL4,MRPS7
GO:0070126	mitochondrial translational termination	8.81e-09	5.148e-05	1.716e-06	1.587e-05	16	86	MRPL12,MRPS35,MRPL35,MRPS28,MRPL58,MRPL15,MRPS15,MRPS23,MRPL40,MRPL11,MRPS27,MRPL16,CHCHD1,MRPL2,MRPL4,MRPS7
GO:0022618	ribonucleoprotein complex assembly	3.941e-08	0.0002303	7.428e-06	6.872e-05	24	208	NUFIP1,PRMT5,EIF3M,GEMIN5,CELF2,TSR1,EIF3G,EIF3I,SNRPC,SNRPD1,MRPL11,ATR,BMS1,CDC123,ERAL1,FAM103A1,C1QBP,PRPF19,DICER1,MRPS7,GEMIN7,EIF2S3,OGFOD1,MRTO4
GO:0009161	ribonucleoside monophosphate metabolic process	4.206e-08	0.0002458	7.68e-06	7.104e-05	29	291	RFK,HK2,PARK7,PFAS,PGK1,PKLR,PKM,AK2,UMPS,ALDOA,ALDOC,MPI,SLC25A33,COX6A1,PPAT,PAICS,NT5C2,ATIC,ATP1B1,MYC,ATP5MC1,IMPDH2,NDUFA9,STAT3,GPI,LDHA,PPIF,NDUFAF1,ENO1
GO:0006734	NADH metabolic process	5.964e-08	0.0003485	1.051e-05	9.726e-05	11	43	HK2,MDH2,PGK1,PKLR,PKM,ALDOA,ALDOC,IDH3A,GPI,LDHA,ENO1
GO:0006915	apoptotic process	6.118e-08	0.0003575	1.051e-05	9.726e-05	102	1923	RFK,HSP90B1,HK2,SIGMAR1,PDK1,CLEC5A,CTSC,PARK7,MAX,OBSCN,PLAC8,PHB,SORT1,CITED2,S100A8,S100A9,FCER1G,PIK3R1,AIF1,CCL2,PLAGL1,ACAA2,CCR7,MMP9,PRDX5,ALDOC,MNDA,HSPA4,ALOX12,NSMAF,VDAC1,HSP90AB1,MPO,CUL4A,FLNA,NAA15,USP28,ERO1A,ANXA5,BAG3,ZDHHC16,EI24,APP,SKIL,SKP2,SP110,YWHAB,THEM4,TIMM50,PRKCA,APPL1,CTH,MYC,NCKAP1,SPP1,RSL1D1,STK26,NAIP,DAD1,NCL,ITGA5,ITGAV,PDCD4,STAT3,STAT5A,BNIP3,PTPRC,SUPV3L1,D…
GO:0012501	programmed cell death	6.743e-08	0.000394	1.126e-05	0.0001041	103	1952	RFK,HSP90B1,HK2,SIGMAR1,PDK1,CLEC5A,CTSC,PARK7,MAX,OBSCN,PLAC8,PHB,SORT1,CITED2,S100A8,S100A9,FCER1G,PIK3R1,PKM,AIF1,CCL2,PLAGL1,ACAA2,CCR7,MMP9,PRDX5,ALDOC,MNDA,HSPA4,ALOX12,NSMAF,VDAC1,HSP90AB1,MPO,CUL4A,FLNA,NAA15,USP28,ERO1A,ANXA5,BAG3,ZDHHC16,EI24,APP,SKIL,SKP2,SP110,YWHAB,THEM4,TIMM50,PRKCA,APPL1,CTH,MYC,NCKAP1,SPP1,RSL1D1,STK26,NAIP,DAD1,NCL,ITGA5,ITGAV,PDCD4,STAT3,STAT5A,BNIP3,PTPRC,SUPV3…
GO:0042274	ribosomal small subunit biogenesis	8.953e-08	0.0005231	1.453e-05	0.0001344	13	65	NOB1,NOP14,TSR1,BMS1,WDR3,ERAL1,RRS1,UTP20,HEATR1,SRFBP1,MRPS7,UTP11,UTP4
GO:0071826	ribonucleoprotein complex subunit organization	9.698e-08	0.0005667	1.531e-05	0.0001417	24	218	NUFIP1,PRMT5,EIF3M,GEMIN5,CELF2,TSR1,EIF3G,EIF3I,SNRPC,SNRPD1,MRPL11,ATR,BMS1,CDC123,ERAL1,FAM103A1,C1QBP,PRPF19,DICER1,MRPS7,GEMIN7,EIF2S3,OGFOD1,MRTO4
GO:0009123	nucleoside monophosphate metabolic process	1.088e-07	0.0006358	1.673e-05	0.0001548	29	304	RFK,HK2,PARK7,PFAS,PGK1,PKLR,PKM,AK2,UMPS,ALDOA,ALDOC,MPI,SLC25A33,COX6A1,PPAT,PAICS,NT5C2,ATIC,ATP1B1,MYC,ATP5MC1,IMPDH2,NDUFA9,STAT3,GPI,LDHA,PPIF,NDUFAF1,ENO1
GO:0055086	nucleobase-containing small molecule metabolic process	1.221e-07	0.0007135	1.829e-05	0.0001692	52	763	GPHN,RFK,PDE3B,HK2,PARK7,PFAS,MDH2,ME2,PGK1,ADCY7,TXN,AHCY,PKLR,PKM,AK2,UMPS,PRDX5,ALDOA,ALDOC,MPI,SLC25A33,EGLN1,COX6A1,SAMHD1,IDH3A,PPAT,PAICS,MTHFD1,NT5C2,PRKCA,ATIC,ATP1B1,MYC,ATP5MC1,IMPDH2,MCCC2,NDUFA9,STAT3,DLAT,APOBEC3C,ENTPD7,GPI,LDHA,LDHB,GSR,PPIF,THBS1,NAMPT,NDUFAF1,TKT,QPRT,ENO1
GO:0065003	macromolecular complex assembly	1.256e-07	0.0007336	1.834e-05	0.0001697	97	1825	GPHN,CCT3,CTSC,PARK7,MAX,IMPACT,CHD4,HMGA1,PFN1,NUFIP1,TUBB1,PNPT1,MGST1,PRMT5,AIF1,BIN2,CCR7,ATXN10,PLEK,MMP9,FH,ALDOA,ALDOC,HSPA4,EIF3M,NAXE,CUL4A,FLNA,DERL1,ANXA2,SLC25A33,ANXA5,GEMIN5,RICTOR,SAMHD1,PPAT,APP,SKIL,YWHAB,MSN,CRYZ,CELF2,TSR1,CCT8,PRKAR2A,CENPV,CTH,EIF3G,EIF3I,ARHGAP18,SNRPC,SNRPD1,MRPL11,TRAPPC2L,MYC,IMPDH2,ATR,NCKAP1,IQGAP2,BMS1,SNAP23,PSMC4,DARS,TUBGCP2,NDUFA9,CDC123,ERAL1,FAM1…
GO:0055114	oxidation-reduction process	1.844e-07	0.001078	2.628e-05	0.0002431	62	996	HK2,ACO2,PARK7,MDH2,ME2,PGK1,TXN,PNPT1,MGST1,SCD,HPGD,PKLR,PKM,ACAA2,ALDH1B1,FH,PRDX5,ALDOA,ALDOC,GSTO1,SLC25A17,ALOX12,MPO,HSD17B7,ERO1A,DHRS11,EGLN1,COX6A1,FAM213A,IDH3A,CPT2,CRYZ,FAR2,MTHFD1,TET1,SORD,CYBB,MYC,IMPDH2,GBE1,BCKDHB,NDUFA9,PHGDH,BNIP3,DHCR24,GLUD2,DLAT,SLC27A2,GPI,PLA2G7,HIGD2A,LDHA,LDHB,GSR,TRAP1,OXA1L,NDUFAF1,LOX,GYG1,PRDX1,OGFOD1,ENO1
GO:0061615	glycolytic process through fructose-6-phosphate	2.158e-07	0.001261	3.002e-05	0.0002777	9	30	HK2,PGK1,PKLR,PKM,ALDOA,ALDOC,MPI,GPI,ENO1
GO:0009167	purine ribonucleoside monophosphate metabolic process	2.239e-07	0.001308	3.042e-05	0.0002814	27	279	HK2,PARK7,PFAS,PGK1,PKLR,PKM,AK2,ALDOA,ALDOC,MPI,SLC25A33,COX6A1,PPAT,PAICS,NT5C2,ATIC,ATP1B1,MYC,ATP5MC1,IMPDH2,NDUFA9,STAT3,GPI,LDHA,PPIF,NDUFAF1,ENO1
GO:0009126	purine nucleoside monophosphate metabolic process	2.406e-07	0.001406	3.196e-05	0.0002956	27	280	HK2,PARK7,PFAS,PGK1,PKLR,PKM,AK2,ALDOA,ALDOC,MPI,SLC25A33,COX6A1,PPAT,PAICS,NT5C2,ATIC,ATP1B1,MYC,ATP5MC1,IMPDH2,NDUFA9,STAT3,GPI,LDHA,PPIF,NDUFAF1,ENO1
GO:0006753	nucleoside phosphate metabolic process	3.473e-07	0.00203	4.51e-05	0.0004172	48	702	GPHN,RFK,PDE3B,HK2,PARK7,PFAS,MDH2,ME2,PGK1,ADCY7,PKLR,PKM,AK2,UMPS,PRDX5,ALDOA,ALDOC,MPI,SLC25A33,EGLN1,COX6A1,SAMHD1,IDH3A,PPAT,PAICS,MTHFD1,NT5C2,PRKCA,ATIC,ATP1B1,MYC,ATP5MC1,IMPDH2,MCCC2,NDUFA9,STAT3,DLAT,ENTPD7,GPI,LDHA,LDHB,PPIF,THBS1,NAMPT,NDUFAF1,TKT,QPRT,ENO1
GO:0009156	ribonucleoside monophosphate biosynthetic process	4.237e-07	0.002476	5.382e-05	0.0004978	14	86	RFK,PFAS,PKLR,PKM,AK2,UMPS,ALDOA,PPAT,PAICS,ATIC,MYC,ATP5MC1,IMPDH2,STAT3
GO:0006090	pyruvate metabolic process	4.626e-07	0.002703	5.751e-05	0.000532	16	113	HK2,PDK1,PGK1,PKLR,PKM,ALDOA,ALDOC,MPI,SLC16A1,MYC,STAT3,DLAT,GPI,LDHA,LDHB,ENO1
GO:0006007	glucose catabolic process	5.348e-07	0.003125	6.51e-05	0.0006022	9	33	HK2,PGK1,PKLR,PKM,ALDOA,ALDOC,GPI,LDHA,ENO1
GO:0009117	nucleotide metabolic process	5.597e-07	0.00327	6.674e-05	0.0006173	47	692	GPHN,RFK,PDE3B,HK2,PARK7,PFAS,MDH2,ME2,PGK1,ADCY7,PKLR,PKM,AK2,UMPS,PRDX5,ALDOA,ALDOC,MPI,SLC25A33,EGLN1,COX6A1,SAMHD1,IDH3A,PPAT,PAICS,MTHFD1,NT5C2,PRKCA,ATIC,ATP1B1,MYC,ATP5MC1,IMPDH2,MCCC2,NDUFA9,STAT3,DLAT,GPI,LDHA,LDHB,PPIF,THBS1,NAMPT,NDUFAF1,TKT,QPRT,ENO1
GO:0042981	regulation of apoptotic process	7.483e-07	0.004372	8.745e-05	0.0008089	82	1519	HSP90B1,SIGMAR1,CLEC5A,CTSC,PARK7,OBSCN,PLAC8,PHB,SORT1,CITED2,S100A8,S100A9,FCER1G,PIK3R1,AIF1,CCL2,ACAA2,CCR7,MMP9,PRDX5,MNDA,HSPA4,ALOX12,NSMAF,HSP90AB1,MPO,FLNA,NAA15,ANXA5,BAG3,EI24,SKIL,SKP2,SP110,YWHAB,PRKCA,CTH,MYC,SPP1,RSL1D1,STK26,NAIP,DAD1,NCL,ITGA5,ITGAV,PDCD4,STAT3,STAT5A,BNIP3,PTPRC,SUPV3L1,DHCR24,C1QBP,MYDGF,FAM162A,RABGGTB,GPI,AVEN,HIGD2A,FZD3,LDHA,CBL,DICER1,LGALS1,PPIF,TGFBR1,GS…
GO:0006735	NADH regeneration	8.344e-07	0.004875	9.199e-05	0.0008509	8	26	HK2,PGK1,PKLR,PKM,ALDOA,ALDOC,GPI,ENO1
GO:0061718	glucose catabolic process to pyruvate	8.344e-07	0.004875	9.199e-05	0.0008509	8	26	HK2,PGK1,PKLR,PKM,ALDOA,ALDOC,GPI,ENO1
GO:0061621	canonical glycolysis	8.344e-07	0.004875	9.199e-05	0.0008509	8	26	HK2,PGK1,PKLR,PKM,ALDOA,ALDOC,GPI,ENO1
GO:0000957	mitochondrial RNA catabolic process	9.824e-07	0.00574	0.0001026	0.000949	4	4	PNPT1,SUPV3L1,LRPPRC,SLIRP
GO:0000960	regulation of mitochondrial RNA catabolic process	9.824e-07	0.00574	0.0001026	0.000949	4	4	PNPT1,SUPV3L1,LRPPRC,SLIRP
GO:0030490	maturation of SSU-rRNA	9.94e-07	0.005808	0.0001026	0.000949	10	45	NOB1,NOP14,TSR1,BMS1,WDR3,RRS1,UTP20,HEATR1,SRFBP1,UTP4
GO:0022411	cellular component disassembly	1.001e-06	0.005848	0.0001026	0.000949	45	663	RIDA,SEH1L,HK2,MRPL12,PDK1,PARK7,OBSCN,MRPS35,HMGA1,MRPL35,FBN1,PLEK,MMP9,MMP14,VDAC1,MRPS28,ANXA5,MRPL58,ZCCHC17,MRPL15,MRPS15,MRPS23,SMARCC1,PRKCA,MRPL40,ATP1B1,CTSG,SNRPD1,MRPL11,CTSS,SPP1,STK26,MRPS27,BNIP3,MRPL16,CHCHD1,KPNB1,EML4,LCP1,DICER1,MRPL2,MRPL4,MRPS7,OGFOD1,WDR45B
GO:0010608	posttranscriptional regulation of gene expression	1.02e-06	0.005962	0.0001028	0.0009508	36	475	RIDA,IMPACT,S100A9,GUF1,EIF3M,SYNCRIP,LIN28B,MRPL58,EPB41L5,APP,YWHAB,DIS3,IGF2BP1,IGF2BP3,IARS2,EIF5B,PRKCA,EIF3G,EIF3I,PSMB2,PSMC4,STAT3,METAP1,CDC123,EIF2B3,C1QBP,PUM3,TNPO1,EXOSC3,GATC,DICER1,LRPPRC,THBS1,TRAP1,OGFOD1,PSME3
GO:0043067	regulation of programmed cell death	1.168e-06	0.006826	0.0001157	0.00107	82	1536	HSP90B1,SIGMAR1,CLEC5A,CTSC,PARK7,OBSCN,PLAC8,PHB,SORT1,CITED2,S100A8,S100A9,FCER1G,PIK3R1,AIF1,CCL2,ACAA2,CCR7,MMP9,PRDX5,MNDA,HSPA4,ALOX12,NSMAF,HSP90AB1,MPO,FLNA,NAA15,ANXA5,BAG3,EI24,SKIL,SKP2,SP110,YWHAB,PRKCA,CTH,MYC,SPP1,RSL1D1,STK26,NAIP,DAD1,NCL,ITGA5,ITGAV,PDCD4,STAT3,STAT5A,BNIP3,PTPRC,SUPV3L1,DHCR24,C1QBP,MYDGF,FAM162A,RABGGTB,GPI,AVEN,HIGD2A,FZD3,LDHA,CBL,DICER1,LGALS1,PPIF,TGFBR1,GS…
GO:0009124	nucleoside monophosphate biosynthetic process	1.293e-06	0.007554	0.0001259	0.001165	14	94	RFK,PFAS,PKLR,PKM,AK2,UMPS,ALDOA,PPAT,PAICS,ATIC,MYC,ATP5MC1,IMPDH2,STAT3
GO:0010941	regulation of cell death	1.649e-06	0.009633	0.0001579	0.001461	86	1650	HSP90B1,SIGMAR1,CLEC5A,CTSC,PARK7,SERPINF1,OBSCN,IMPACT,PLAC8,PHB,TXN,SORT1,CITED2,S100A8,S100A9,FCER1G,PIK3R1,AIF1,CCL2,ACAA2,CCR7,MMP9,PRDX5,MNDA,HSPA4,ALOX12,NSMAF,HSP90AB1,MPO,FLNA,NAA15,ANXA5,BAG3,EI24,SKIL,SKP2,SP110,YWHAB,TBK1,PRKCA,CTH,MYC,SPP1,RSL1D1,STK26,NAIP,DAD1,NCL,ITGA5,ITGAV,PDCD4,STAT3,STAT5A,BNIP3,PTPRC,SUPV3L1,DHCR24,C1QBP,MYDGF,FAM162A,RABGGTB,GPI,AVEN,HIGD2A,FZD3,LDHA,CBL,DIC…
GO:0042273	ribosomal large subunit biogenesis	1.843e-06	0.01077	0.0001737	0.001607	11	59	GTPBP4,NOP16,WDR12,MRPL11,RSL1D1,MAK16,RRS1,EBNA1BP2,SDAD1,PES1,MRTO4
GO:0061620	glycolytic process through glucose-6-phosphate	2.11e-06	0.01233	0.0001957	0.00181	8	29	HK2,PGK1,PKLR,PKM,ALDOA,ALDOC,GPI,ENO1
GO:0046031	ADP metabolic process	2.272e-06	0.01327	0.0002074	0.001918	13	85	HK2,PGK1,PKLR,PKM,AK2,ALDOA,ALDOC,MPI,MYC,STAT3,GPI,LDHA,ENO1
GO:0006091	generation of precursor metabolites and energy	2.542e-06	0.01486	0.0002285	0.002114	31	393	HK2,ACO2,PARK7,MDH2,PGK1,PNPT1,PKLR,PKM,AK2,FH,ALDOA,ALDOC,MPI,SLC25A33,COX6A1,IDH3A,MYC,GBE1,NDUFA9,STAT3,BNIP3,DLAT,GPI,RUNX1T1,LDHA,PPIF,TRAP1,OXA1L,NDUFAF1,GYG1,ENO1
GO:0009127	purine nucleoside monophosphate biosynthetic process	2.955e-06	0.01726	0.0002577	0.002384	12	74	PFAS,PKLR,PKM,AK2,ALDOA,PPAT,PAICS,ATIC,MYC,ATP5MC1,IMPDH2,STAT3
GO:0009168	purine ribonucleoside monophosphate biosynthetic process	2.955e-06	0.01726	0.0002577	0.002384	12	74	PFAS,PKLR,PKM,AK2,ALDOA,PPAT,PAICS,ATIC,MYC,ATP5MC1,IMPDH2,STAT3
GO:0006096	glycolytic process	3.946e-06	0.02306	0.0003391	0.003136	12	76	HK2,PGK1,PKLR,PKM,ALDOA,ALDOC,MPI,MYC,STAT3,GPI,LDHA,ENO1
GO:0006520	cellular amino acid metabolic process	4.053e-06	0.02368	0.0003432	0.003175	31	402	ABAT,PARK7,PFAS,WARS2,LRRC47,FAH,SLC25A32,AHCY,ERO1A,EGLN1,PPA1,PPAT,IARS2,MTHFD1,MTR,CTH,ATIC,PSMB2,PSMC4,BCAT1,DARS,BCKDHB,MCCC2,PHGDH,STAT5A,GLUD2,DHPS,GOT2,GATC,PSME3,QRSL1
GO:0043066	negative regulation of apoptotic process	4.246e-06	0.02481	0.0003497	0.003235	54	905	HSP90B1,CLEC5A,PARK7,PLAC8,PHB,CITED2,FCER1G,PIK3R1,AIF1,CCL2,ACAA2,CCR7,MMP9,PRDX5,HSPA4,ALOX12,HSP90AB1,MPO,FLNA,NAA15,ANXA5,BAG3,PRKCA,CTH,MYC,SPP1,NAIP,DAD1,NCL,ITGA5,ITGAV,PDCD4,STAT3,STAT5A,BNIP3,SUPV3L1,DHCR24,MYDGF,GPI,AVEN,HIGD2A,FZD3,CBL,PPIF,TGFBR1,GSTP1,THBS1,TRAP1,HEY2,PSME3,EPCAM,HCLS1,SMAD6,AURKB
GO:0046365	monosaccharide catabolic process	4.25e-06	0.02483	0.0003497	0.003235	11	64	HK2,PGK1,PKLR,PKM,ALDOA,ALDOC,MPI,SORD,GPI,LDHA,ENO1
GO:0006757	ATP generation from ADP	4.543e-06	0.02655	0.0003687	0.003411	12	77	HK2,PGK1,PKLR,PKM,ALDOA,ALDOC,MPI,MYC,STAT3,GPI,LDHA,ENO1
GO:0006417	regulation of translation	5.052e-06	0.02952	0.0004043	0.00374	28	347	RIDA,IMPACT,S100A9,GUF1,EIF3M,SYNCRIP,LIN28B,MRPL58,APP,IGF2BP1,IGF2BP3,IARS2,EIF5B,PRKCA,EIF3G,EIF3I,STAT3,METAP1,CDC123,EIF2B3,C1QBP,PUM3,GATC,DICER1,LRPPRC,THBS1,TRAP1,OGFOD1
GO:0032787	monocarboxylic acid metabolic process	5.155e-06	0.03012	0.000407	0.003765	41	617	ABAT,HK2,PDK1,ACLY,PARK7,PGK1,ACSM3,SCD,HPGD,PKLR,LYPLA1,PKM,ACAA2,ALDOA,ALDOC,SLC25A17,ALOX12,MPI,HACD3,ERO1A,EGLN1,CPT2,PNKD,THEM4,SLC16A1,VCAN,SORD,MYC,BCKDHB,MCCC2,PHGDH,STAT3,STAT5A,HPGDS,DLAT,GOT2,SLC27A2,GPI,LDHA,LDHB,ENO1
GO:0009185	ribonucleoside diphosphate metabolic process	5.557e-06	0.03247	0.000433	0.004005	14	106	HK2,PGK1,PKLR,PKM,AK2,ALDOA,ALDOC,MPI,MYC,STAT3,ENTPD7,GPI,LDHA,ENO1
GO:0019320	hexose catabolic process	5.788e-06	0.03382	0.000445	0.004116	10	54	HK2,PGK1,PKLR,PKM,ALDOA,ALDOC,MPI,GPI,LDHA,ENO1
GO:0044282	small molecule catabolic process	6.052e-06	0.03536	0.0004592	0.004248	29	370	ABAT,HK2,PARK7,PGK1,FAH,AHCY,PKLR,PKM,ACAA2,ALDH1B1,ALDOA,ALDOC,SLC25A17,MPI,PPAT,CPT2,PNKD,CTH,SORD,BCAT1,BCKDHB,MCCC2,GLUD2,GOT2,SLC27A2,GPI,LDHA,QPRT,ENO1
GO:0043069	negative regulation of programmed cell death	6.621e-06	0.03869	0.000496	0.004588	54	919	HSP90B1,CLEC5A,PARK7,PLAC8,PHB,CITED2,FCER1G,PIK3R1,AIF1,CCL2,ACAA2,CCR7,MMP9,PRDX5,HSPA4,ALOX12,HSP90AB1,MPO,FLNA,NAA15,ANXA5,BAG3,PRKCA,CTH,MYC,SPP1,NAIP,DAD1,NCL,ITGA5,ITGAV,PDCD4,STAT3,STAT5A,BNIP3,SUPV3L1,DHCR24,MYDGF,GPI,AVEN,HIGD2A,FZD3,CBL,PPIF,TGFBR1,GSTP1,THBS1,TRAP1,HEY2,PSME3,EPCAM,HCLS1,SMAD6,AURKB
GO:0000469	cleavage involved in rRNA processing	8.36e-06	0.04885	0.0006183	0.005719	7	25	NOB1,NOP14,TSR1,BMS1,RRS1,UTP20,EXOSC3
GO:0060548	negative regulation of cell death	9.247e-06	0.05403	0.0006753	0.006247	57	1001	HSP90B1,CLEC5A,PARK7,SERPINF1,IMPACT,PLAC8,PHB,TXN,CITED2,FCER1G,PIK3R1,AIF1,CCL2,ACAA2,CCR7,MMP9,PRDX5,HSPA4,ALOX12,HSP90AB1,MPO,FLNA,NAA15,ANXA5,BAG3,PRKCA,CTH,MYC,SPP1,NAIP,DAD1,NCL,ITGA5,ITGAV,PDCD4,STAT3,STAT5A,BNIP3,SUPV3L1,DHCR24,MYDGF,GPI,AVEN,HIGD2A,FZD3,CBL,PPIF,TGFBR1,GSTP1,THBS1,TRAP1,HEY2,PSME3,EPCAM,HCLS1,SMAD6,AURKB
GO:0050821	protein stabilization	9.813e-06	0.05734	0.0007079	0.006548	16	142	GTPBP4,CCT3,PARK7,PFN1,PHB,PIK3R1,ZSWIM7,HSP90AB1,FLNA,NAA15,BAG3,CCT7,PPIB,CCT8,ATP1B1,NCKAP1
GO:0034248	regulation of cellular amide metabolic process	1.009e-05	0.05896	0.000719	0.006651	29	380	RIDA,IMPACT,S100A9,GUF1,EIF3M,NSMAF,SYNCRIP,LIN28B,MRPL58,APP,IGF2BP1,IGF2BP3,IARS2,EIF5B,PRKCA,EIF3G,EIF3I,STAT3,METAP1,CDC123,EIF2B3,C1QBP,PUM3,GATC,DICER1,LRPPRC,THBS1,TRAP1,OGFOD1
GO:1901698	response to nitrogen compound	1.035e-05	0.0605	0.0007289	0.006742	56	981	HSP90B1,ABAT,PDE3B,MAX,IMPACT,HMGCS1,ADCY7,EFTUD2,SORT1,FBN1,MGST1,MAVS,PIK3R1,UCHL3,PKLR,PKM,AIF1,CCL2,CCR7,ABCG2,PLD1,HOMER1,LIN28B,SLC25A33,ANXA5,EGLN1,PPAT,APP,MTR,SMARCC1,PRKAR2A,PRKCA,APPL1,ATP2A2,MYC,DHX36,PSMB2,NAIP,ITGAV,STAT3,STAT5A,TBC1D4,EIF2B3,IPO5,GPI,RAB31,GRB2,LDHA,DICER1,GSTP1,THBS1,NAMPT,EGR1,TIMP3,LYN,DDX21
GO:0009725	response to hormone	1.167e-05	0.06817	0.0008116	0.007507	58	1033	UBA5,NR2F6,PDE3B,PARK7,MAX,SERPINF1,HMGCS1,ADCY7,PHB,SORT1,CITED2,FBN1,PIK3R1,UCHL3,PKLR,PKM,AIF1,CCL2,AK2,CCR7,ABCG2,PLD1,MMP14,ANXA2,SLC25A33,ANXA5,PPAT,SKP2,MSN,SMARCC1,PRKAR2A,PRKCA,APPL1,ATP2A2,CTSS,SORD,SPP1,NAIP,RUVBL2,STAT3,STAT5A,TBC1D4,DHCR24,EIF2B3,RAB31,KRT19,GRB2,LDHA,TGFBR1,GSTP1,THBS1,NAMPT,EGR1,TIMP3,LOX,LYN,HCLS1,SMAD6
GO:0043241	protein complex disassembly	1.231e-05	0.07191	0.000846	0.007826	23	267	RIDA,MRPL12,MRPS35,HMGA1,MRPL35,PLEK,MRPS28,MRPL58,MRPL15,MRPS15,MRPS23,SMARCC1,MRPL40,MRPL11,MRPS27,BNIP3,MRPL16,CHCHD1,EML4,MRPL2,MRPL4,MRPS7,OGFOD1
GO:0043624	cellular protein complex disassembly	1.292e-05	0.07547	0.0008775	0.008117	20	213	RIDA,MRPL12,MRPS35,MRPL35,PLEK,MRPS28,MRPL58,MRPL15,MRPS15,MRPS23,MRPL40,MRPL11,MRPS27,MRPL16,CHCHD1,EML4,MRPL2,MRPL4,MRPS7,OGFOD1
GO:0006189	'de novo' IMP biosynthetic process	1.356e-05	0.07925	0.0009109	0.008426	4	6	PFAS,PPAT,PAICS,ATIC
GO:0009199	ribonucleoside triphosphate metabolic process	1.475e-05	0.08616	0.0009719	0.00899	23	270	GPHN,HK2,PARK7,PGK1,PKLR,PKM,AK2,ALDOA,ALDOC,MPI,SLC25A33,COX6A1,ATP1B1,MYC,ATP5MC1,NDUFA9,STAT3,ENTPD7,GPI,LDHA,PPIF,NDUFAF1,ENO1
GO:0006399	tRNA metabolic process	1.48e-05	0.08649	0.0009719	0.00899	18	180	UBA5,FBL,WARS2,LRRC47,PUS7,TYW3,RTCB,TRMT1,PPA1,TRUB2,IARS2,TRMT6,DARS,NSUN2,EXOSC3,GATC,NAT10,QRSL1
GO:0000302	response to reactive oxygen species	1.538e-05	0.08987	0.0009982	0.009234	22	252	PARK7,IMPACT,TXN,CCR7,PRDX5,MPO,ERO1A,EGLN1,MTR,PRKCA,CYBB,STK26,ITGAV,BNIP3,LDHA,OLR1,GSR,PPIF,GSTP1,THBS1,TRAP1,PRDX1
GO:0009144	purine nucleoside triphosphate metabolic process	1.565e-05	0.09145	0.0009982	0.009234	23	271	GPHN,HK2,PARK7,PGK1,PKLR,PKM,AK2,ALDOA,ALDOC,MPI,SLC25A33,COX6A1,SAMHD1,ATP1B1,MYC,ATP5MC1,NDUFA9,STAT3,GPI,LDHA,PPIF,NDUFAF1,ENO1
GO:0009179	purine ribonucleoside diphosphate metabolic process	1.589e-05	0.09284	0.0009982	0.009234	13	101	HK2,PGK1,PKLR,PKM,AK2,ALDOA,ALDOC,MPI,MYC,STAT3,GPI,LDHA,ENO1
GO:0009135	purine nucleoside diphosphate metabolic process	1.589e-05	0.09284	0.0009982	0.009234	13	101	HK2,PGK1,PKLR,PKM,AK2,ALDOA,ALDOC,MPI,MYC,STAT3,GPI,LDHA,ENO1
GO:0072521	purine-containing compound metabolic process	1.63e-05	0.09524	0.001013	0.009372	39	603	GPHN,PDE3B,HK2,PARK7,PFAS,PGK1,ADCY7,AHCY,PKLR,PKM,AK2,ABCG2,ALDOA,ALDOC,MPI,SLC25A33,EGLN1,COX6A1,SAMHD1,PPAT,PAICS,MTHFD1,NT5C2,PRKCA,ATIC,ATP1B1,MYC,ATP5MC1,IMPDH2,MCCC2,NDUFA9,STAT3,GPI,SLC16A9,LDHA,PPIF,THBS1,NDUFAF1,ENO1
GO:0046939	nucleotide phosphorylation	1.77e-05	0.1034	0.001088	0.01007	13	102	HK2,PGK1,PKLR,PKM,AK2,ALDOA,ALDOC,MPI,MYC,STAT3,GPI,LDHA,ENO1
GO:0006457	protein folding	1.795e-05	0.1049	0.001092	0.0101	21	236	HSP90B1,CCT3,DNAJA2,TXN,HSP90AB1,HSPA4L,ERO1A,BAG3,CCT7,PPIB,GRPEL1,PPIL1,CCT8,EMC1,RUVBL2,SACS,CANX,PPIF,TRAP1,LMAN1,PDCD5
GO:0009116	nucleoside metabolic process	1.848e-05	0.108	0.001103	0.0102	30	413	GPHN,HK2,PARK7,PGK1,AHCY,PKLR,PKM,AK2,UMPS,ALDOA,ALDOC,MPI,SLC25A33,COX6A1,PPAT,NT5C2,ATIC,ATP1B1,MYC,ATP5MC1,IMPDH2,MCCC2,NDUFA9,STAT3,APOBEC3C,GPI,LDHA,PPIF,NDUFAF1,ENO1
GO:0006909	phagocytosis	1.85e-05	0.1081	0.001103	0.0102	22	255	CORO1C,CLEC7A,FCER1G,FCN1,PIK3R1,AIF1,CCL2,BIN2,CCR7,PLD1,HSP90AB1,PROS1,PRTN3,NCKAP1,ITGAV,STAP1,DOCK2,GRB2,ACTR2,THBS1,CD14,LYN
GO:1901657	glycosyl compound metabolic process	1.952e-05	0.114	0.00115	0.01064	31	435	GPHN,HK2,PARK7,PGK1,AHCY,PKLR,PKM,AK2,UMPS,ALDOA,ALDOC,MPI,SLC25A33,COX6A1,PPAT,NT5C2,ATIC,FUCA2,ATP1B1,MYC,ATP5MC1,IMPDH2,MCCC2,NDUFA9,STAT3,APOBEC3C,GPI,LDHA,PPIF,NDUFAF1,ENO1
GO:0007006	mitochondrial membrane organization	1.968e-05	0.115	0.00115	0.01064	13	103	HK2,APOOL,ACAA2,HSPA4,YWHAB,THEM4,TIMM50,MYC,STAT3,BNIP3,COX18,PPIF,PDCD5
GO:0009141	nucleoside triphosphate metabolic process	2.073e-05	0.1211	0.001199	0.01109	24	295	GPHN,HK2,PARK7,PGK1,PKLR,PKM,AK2,ALDOA,ALDOC,MPI,SLC25A33,COX6A1,SAMHD1,ATP1B1,MYC,ATP5MC1,NDUFA9,STAT3,ENTPD7,GPI,LDHA,PPIF,NDUFAF1,ENO1
GO:0016053	organic acid biosynthetic process	2.131e-05	0.1245	0.001199	0.01109	25	315	ABAT,ACLY,PARK7,ACSM3,SCD,AHCY,PKLR,PKM,GSTO1,ALOX12,HACD3,MTHFD1,VCAN,MTR,CTH,ATIC,BCAT1,PHGDH,HPGDS,GLUD2,DHPS,GOT2,SLC27A2,LDHA,LDHB
GO:0046394	carboxylic acid biosynthetic process	2.131e-05	0.1245	0.001199	0.01109	25	315	ABAT,ACLY,PARK7,ACSM3,SCD,AHCY,PKLR,PKM,GSTO1,ALOX12,HACD3,MTHFD1,VCAN,MTR,CTH,ATIC,BCAT1,PHGDH,HPGDS,GLUD2,DHPS,GOT2,SLC27A2,LDHA,LDHB
GO:0019693	ribose phosphate metabolic process	2.134e-05	0.1247	0.001199	0.01109	37	566	GPHN,RFK,PDE3B,HK2,PARK7,PFAS,PGK1,ADCY7,PKLR,PKM,AK2,UMPS,ALDOA,ALDOC,MPI,SLC25A33,EGLN1,COX6A1,PPAT,PAICS,NT5C2,PRKCA,ATIC,ATP1B1,MYC,ATP5MC1,IMPDH2,MCCC2,NDUFA9,STAT3,GPI,LDHA,PPIF,THBS1,NDUFAF1,TKT,ENO1
GO:0006979	response to oxidative stress	2.329e-05	0.1361	0.001296	0.01199	31	439	PDK1,PARK7,IMPACT,TXN,PNPT1,MGST1,AIF1,CCR7,MMP9,PRDX5,MMP14,MPO,ERO1A,EGLN1,APP,MTR,PRKCA,ATP2A2,CYBB,STK26,ITGAV,BNIP3,DHCR24,LDHA,OLR1,GSR,PPIF,GSTP1,THBS1,TRAP1,PRDX1
GO:0032984	macromolecular complex disassembly	2.353e-05	0.1375	0.001297	0.012	23	278	RIDA,MRPL12,MRPS35,HMGA1,MRPL35,PLEK,MRPS28,MRPL58,MRPL15,MRPS15,MRPS23,SMARCC1,MRPL40,MRPL11,MRPS27,BNIP3,MRPL16,CHCHD1,EML4,MRPL2,MRPL4,MRPS7,OGFOD1
GO:0046034	ATP metabolic process	2.615e-05	0.1528	0.001428	0.01321	21	242	HK2,PARK7,PGK1,PKLR,PKM,AK2,ALDOA,ALDOC,MPI,SLC25A33,COX6A1,ATP1B1,MYC,ATP5MC1,NDUFA9,STAT3,GPI,LDHA,PPIF,NDUFAF1,ENO1
GO:0009259	ribonucleotide metabolic process	2.788e-05	0.1629	0.001508	0.01395	36	551	GPHN,RFK,PDE3B,HK2,PARK7,PFAS,PGK1,ADCY7,PKLR,PKM,AK2,UMPS,ALDOA,ALDOC,MPI,SLC25A33,EGLN1,COX6A1,PPAT,PAICS,NT5C2,PRKCA,ATIC,ATP1B1,MYC,ATP5MC1,IMPDH2,MCCC2,NDUFA9,STAT3,GPI,LDHA,PPIF,THBS1,NDUFAF1,ENO1
GO:1900046	regulation of hemostasis	2.929e-05	0.1711	0.001556	0.01439	12	92	ABAT,S100A9,FCER1G,PLEK,ALOX12,ANXA2,ANXA5,PRKCA,PROS1,PTPRJ,THBS1,LYN
GO:0030193	regulation of blood coagulation	2.929e-05	0.1711	0.001556	0.01439	12	92	ABAT,S100A9,FCER1G,PLEK,ALOX12,ANXA2,ANXA5,PRKCA,PROS1,PTPRJ,THBS1,LYN
GO:0009205	purine ribonucleoside triphosphate metabolic process	2.978e-05	0.174	0.001567	0.0145	22	263	GPHN,HK2,PARK7,PGK1,PKLR,PKM,AK2,ALDOA,ALDOC,MPI,SLC25A33,COX6A1,ATP1B1,MYC,ATP5MC1,NDUFA9,STAT3,GPI,LDHA,PPIF,NDUFAF1,ENO1
GO:0000479	endonucleolytic cleavage of tricistronic rRNA transcript (SSU-rRNA, 5.8S rRNA, LSU-rRNA)	3.087e-05	0.1804	0.001611	0.0149	5	13	NOP14,TSR1,BMS1,RRS1,UTP20
GO:0070488	neutrophil aggregation	3.154e-05	0.1843	0.001617	0.01495	3	3	S100A8,S100A9,GSTP1
GO:0071460	cellular response to cell-matrix adhesion	3.154e-05	0.1843	0.001617	0.01495	3	3	MMP9,SKP2,GSTP1
GO:0006163	purine nucleotide metabolic process	3.245e-05	0.1896	0.001649	0.01525	36	555	GPHN,PDE3B,HK2,PARK7,PFAS,PGK1,ADCY7,PKLR,PKM,AK2,ALDOA,ALDOC,MPI,SLC25A33,EGLN1,COX6A1,SAMHD1,PPAT,PAICS,MTHFD1,NT5C2,PRKCA,ATIC,ATP1B1,MYC,ATP5MC1,IMPDH2,MCCC2,NDUFA9,STAT3,GPI,LDHA,PPIF,THBS1,NDUFAF1,ENO1
GO:0000466	maturation of 5.8S rRNA from tricistronic rRNA transcript (SSU-rRNA, 5.8S rRNA, LSU-rRNA)	3.331e-05	0.1947	0.001678	0.01552	6	21	NOP14,WDR12,RRS1,UTP20,EXOSC3,PES1
GO:0006165	nucleoside diphosphate phosphorylation	4.052e-05	0.2368	0.002023	0.01872	12	95	HK2,PGK1,PKLR,PKM,ALDOA,ALDOC,MPI,MYC,STAT3,GPI,LDHA,ENO1
GO:0009132	nucleoside diphosphate metabolic process	4.086e-05	0.2388	0.002023	0.01872	14	126	HK2,PGK1,PKLR,PKM,AK2,ALDOA,ALDOC,MPI,MYC,STAT3,ENTPD7,GPI,LDHA,ENO1
GO:1901700	response to oxygen-containing compound	4.325e-05	0.2527	0.002124	0.01964	79	1614	HSP90B1,ABAT,PDE3B,PARK7,MAX,SERPINF1,IMPACT,CLEC7A,HMGCS1,HMGN3,ADCY7,TXN,EFTUD2,SORT1,S100A8,FBN1,MGST1,PIK3R1,SCD,UCHL3,PKLR,PKM,AIF1,CCL2,CCR7,ABCG2,PLD1,PRDX5,HOMER1,MPO,ERO1A,SLC25A33,ANXA5,EGLN1,PPAT,APP,MSN,MTR,SMARCC1,PRKAR2A,PRKCA,APPL1,CTSG,ATP2A2,PROS1,CYBB,SPP1,STK26,NAIP,NCL,ITGAV,RUVBL2,STAP1,STAT3,STAT5A,BNIP3,TBC1D4,MAPKAPK3,EIF2B3,GOT2,IPO5,KRT13,RAB31,GRB2,LDHA,OLR1,LGALS1,GSR,…
GO:0009119	ribonucleoside metabolic process	4.494e-05	0.2626	0.002174	0.02011	28	391	GPHN,HK2,PARK7,PGK1,AHCY,PKLR,PKM,AK2,UMPS,ALDOA,ALDOC,MPI,SLC25A33,COX6A1,NT5C2,ATP1B1,MYC,ATP5MC1,IMPDH2,MCCC2,NDUFA9,STAT3,APOBEC3C,GPI,LDHA,PPIF,NDUFAF1,ENO1
GO:0050818	regulation of coagulation	4.502e-05	0.263	0.002174	0.02011	12	96	ABAT,S100A9,FCER1G,PLEK,ALOX12,ANXA2,ANXA5,PRKCA,PROS1,PTPRJ,THBS1,LYN
GO:0000478	endonucleolytic cleavage involved in rRNA processing	4.679e-05	0.2734	0.002223	0.02056	5	14	NOP14,TSR1,BMS1,RRS1,UTP20
GO:0046040	IMP metabolic process	4.679e-05	0.2734	0.002223	0.02056	5	14	PFAS,PPAT,PAICS,NT5C2,ATIC
GO:0000460	maturation of 5.8S rRNA	4.838e-05	0.2827	0.00228	0.02109	7	32	NOP14,WDR12,MAK16,RRS1,UTP20,EXOSC3,PES1
GO:0008652	cellular amino acid biosynthetic process	4.994e-05	0.2918	0.002334	0.02159	12	97	ABAT,PARK7,AHCY,MTHFD1,MTR,CTH,ATIC,BCAT1,PHGDH,GLUD2,DHPS,GOT2
GO:0005996	monosaccharide metabolic process	5.38e-05	0.3143	0.002495	0.02308	24	313	HK2,PDK1,MDH2,PGK1,FABP5,PIK3R1,PKLR,PKM,ALDOA,ALDOC,GSTO1,MPI,SLC2A3,FUCA2,SORD,MYC,SDHAF3,DLAT,GOT2,GPI,LDHA,TKT,SLC35B4,ENO1
GO:0006101	citrate metabolic process	5.977e-05	0.3492	0.002728	0.02524	7	33	ACLY,ACO2,MDH2,FH,IDH3A,STAT5A,DLAT
GO:0000959	mitochondrial RNA metabolic process	5.977e-05	0.3492	0.002728	0.02524	7	33	MRPL12,PNPT1,SLC25A33,SUPV3L1,TFAM,LRPPRC,SLIRP
GO:0046128	purine ribonucleoside metabolic process	7.595e-05	0.4438	0.00344	0.03182	26	361	GPHN,HK2,PARK7,PGK1,AHCY,PKLR,PKM,AK2,ALDOA,ALDOC,MPI,SLC25A33,COX6A1,NT5C2,ATP1B1,MYC,ATP5MC1,IMPDH2,MCCC2,NDUFA9,STAT3,GPI,LDHA,PPIF,NDUFAF1,ENO1
GO:0009150	purine ribonucleotide metabolic process	8.299e-05	0.4849	0.00373	0.0345	34	536	GPHN,PDE3B,HK2,PARK7,PFAS,PGK1,ADCY7,PKLR,PKM,AK2,ALDOA,ALDOC,MPI,SLC25A33,EGLN1,COX6A1,PPAT,PAICS,NT5C2,PRKCA,ATIC,ATP1B1,MYC,ATP5MC1,IMPDH2,MCCC2,NDUFA9,STAT3,GPI,LDHA,PPIF,THBS1,NDUFAF1,ENO1
GO:0010035	response to inorganic substance	8.471e-05	0.495	0.003778	0.03495	35	559	ABAT,PARK7,SERPINF1,IMPACT,HMGCS1,TXN,S100A8,PKLR,CCR7,ABCG2,SLC30A10,HOMER1,MPO,ANXA5,EGLN1,APP,MT1G,MT1H,MT1X,MT2A,MTR,ATIC,SORD,STK26,ITGAV,IQGAP1,BNIP3,LDHA,OLR1,PPIF,GSTP1,THBS1,TRAP1,CD14,PRDX1
GO:0042278	purine nucleoside metabolic process	8.697e-05	0.5082	0.00385	0.03561	26	364	GPHN,HK2,PARK7,PGK1,AHCY,PKLR,PKM,AK2,ALDOA,ALDOC,MPI,SLC25A33,COX6A1,NT5C2,ATP1B1,MYC,ATP5MC1,IMPDH2,MCCC2,NDUFA9,STAT3,GPI,LDHA,PPIF,NDUFAF1,ENO1
GO:0000462	maturation of SSU-rRNA from tricistronic rRNA transcript (SSU-rRNA, 5.8S rRNA, LSU-rRNA)	8.911e-05	0.5207	0.003885	0.03594	7	35	NOP14,TSR1,BMS1,WDR3,RRS1,UTP20,HEATR1
GO:0010543	regulation of platelet activation	8.911e-05	0.5207	0.003885	0.03594	7	35	ABAT,FCER1G,PLEK,ALOX12,PRKCA,PTPRJ,LYN
GO:0061041	regulation of wound healing	9.471e-05	0.5534	0.004099	0.03792	14	136	ABAT,CD109,S100A9,FCER1G,PLEK,ALOX12,ANXA2,ANXA5,PRKCA,PROS1,MYC,PTPRJ,THBS1,LYN
GO:0019637	organophosphate metabolic process	9.745e-05	0.5694	0.004187	0.03873	60	1164	GPHN,RFK,PDE3B,HK2,AGPAT5,PARK7,PFAS,MDH2,ME2,PGK1,ADCY7,FABP5,PIK3R1,PKLR,PKM,AK2,UMPS,CCR7,PLD1,PLEK,PRDX5,ALDOA,ALDOC,MPI,SLC25A33,EGLN1,COX6A1,SAMHD1,IDH3A,PPAT,PAICS,MTHFD1,NUS1,NT5C2,PRKCA,ATIC,ATP1B1,SORD,MYC,ATP5MC1,IMPDH2,MCCC2,NDUFA9,STAT3,PHOSPHO1,DLAT,ENTPD7,GPI,HDHD5,GRB2,LDHA,LDHB,PPIF,THBS1,NAMPT,NDUFAF1,TKT,QPRT,LYN,ENO1
GO:0034622	cellular macromolecular complex assembly	0.0001009	0.5893	0.004301	0.03979	53	991	PFN1,NUFIP1,PRMT5,AIF1,CCR7,HSPA4,EIF3M,CUL4A,SLC25A33,GEMIN5,RICTOR,CELF2,TSR1,CENPV,EIF3G,EIF3I,ARHGAP18,SNRPC,SNRPD1,MRPL11,ATR,NCKAP1,IQGAP2,BMS1,SNAP23,PSMC4,TUBGCP2,NDUFA9,CDC123,ERAL1,FAM103A1,C1QBP,PRPF19,KPNB1,TNPO1,IPO5,HIGD2A,GRB2,COX18,TFAM,DICER1,ACTR2,TMEM33,MRPS7,GEMIN7,OXA1L,NDUFAF1,EIF2S3,HEY2,OGFOD1,MRTO4,HCLS1,SMAD6
GO:0019318	hexose metabolic process	0.0001087	0.6352	0.004603	0.04257	21	267	HK2,PDK1,MDH2,PGK1,FABP5,PIK3R1,PKLR,PKM,ALDOA,ALDOC,MPI,FUCA2,SORD,MYC,SDHAF3,DLAT,GOT2,GPI,LDHA,SLC35B4,ENO1
GO:0006006	glucose metabolic process	0.0001139	0.6658	0.00479	0.04431	19	229	HK2,PDK1,MDH2,PGK1,FABP5,PIK3R1,PKLR,PKM,ALDOA,ALDOC,SORD,MYC,SDHAF3,DLAT,GOT2,GPI,LDHA,SLC35B4,ENO1
GO:0046364	monosaccharide biosynthetic process	0.0001195	0.6981	0.004987	0.04613	12	106	MDH2,PGK1,ALDOA,ALDOC,GSTO1,SORD,SDHAF3,GOT2,GPI,TKT,SLC35B4,ENO1
GO:2001235	positive regulation of apoptotic signaling pathway	0.0001254	0.7328	0.005177	0.04789	17	193	CTSC,PARK7,S100A8,S100A9,MMP9,EI24,SKIL,YWHAB,MYC,BNIP3,PTPRC,FAM162A,PPIF,TGFBR1,THBS1,TIMP3,PDCD5
GO:0070271	protein complex biogenesis	0.0001267	0.7403	0.005177	0.04789	75	1562	GPHN,CCT3,CTSC,PARK7,MAX,IMPACT,CHD4,HMGA1,PFN1,NUFIP1,TUBB1,PNPT1,MGST1,AIF1,BIN2,CCR7,ATXN10,PLEK,MMP9,FH,ALDOA,ALDOC,HSPA4,NAXE,CUL4A,FLNA,DERL1,ANXA2,SLC25A33,ANXA5,GEMIN5,RICTOR,SAMHD1,PPAT,APP,SKIL,YWHAB,MSN,CRYZ,CCT8,PRKAR2A,CTH,ARHGAP18,TRAPPC2L,MYC,IMPDH2,NCKAP1,IQGAP2,SNAP23,PSMC4,DARS,TUBGCP2,NDUFA9,DHPS,KPNB1,TNPO1,IPO5,HIGD2A,GOPC,GRB2,COX18,LCP1,TFAM,DICER1,ACTR2,TMEM33,OXA1L,LMAN1,…
GO:0006461	protein complex assembly	0.0001267	0.7403	0.005177	0.04789	75	1562	GPHN,CCT3,CTSC,PARK7,MAX,IMPACT,CHD4,HMGA1,PFN1,NUFIP1,TUBB1,PNPT1,MGST1,AIF1,BIN2,CCR7,ATXN10,PLEK,MMP9,FH,ALDOA,ALDOC,HSPA4,NAXE,CUL4A,FLNA,DERL1,ANXA2,SLC25A33,ANXA5,GEMIN5,RICTOR,SAMHD1,PPAT,APP,SKIL,YWHAB,MSN,CRYZ,CCT8,PRKAR2A,CTH,ARHGAP18,TRAPPC2L,MYC,IMPDH2,NCKAP1,IQGAP2,SNAP23,PSMC4,DARS,TUBGCP2,NDUFA9,DHPS,KPNB1,TNPO1,IPO5,HIGD2A,GOPC,GRB2,COX18,LCP1,TFAM,DICER1,ACTR2,TMEM33,OXA1L,LMAN1,…
GO:1901701	cellular response to oxygen-containing compound	0.0001299	0.7592	0.005272	0.04877	53	1001	HSP90B1,PDE3B,PARK7,MAX,SERPINF1,IMPACT,CLEC7A,HMGCS1,HMGN3,ADCY7,TXN,FBN1,MGST1,PIK3R1,UCHL3,PKLR,AIF1,CCL2,ABCG2,PRDX5,MPO,SLC25A33,ANXA5,PPAT,APP,MSN,MTR,SMARCC1,PRKAR2A,PRKCA,APPL1,STK26,NCL,RUVBL2,STAP1,STAT3,STAT5A,BNIP3,TBC1D4,IPO5,KRT13,RAB31,GRB2,LGALS1,PPIF,GSTP1,THBS1,TRAP1,NAMPT,CD14,EGR1,PRDX1,LYN
GO:0044419	interspecies interaction between organisms	0.0001385	0.809	0.005541	0.05126	45	808	SEH1L,CLEC5A,RPS23,HMGA1,PFN1,MAVS,FCN1,PIK3R1,SCD,CCL2,MMP9,VDAC1,SYNCRIP,HSP90AB1,MPO,CUL4A,VIM,DERL1,HACD3,PPIB,SP110,YWHAB,THEM4,TBK1,FUCA2,EIF3G,CTSG,MYC,NCKAP1,PSMB2,ITGA5,ITGAV,STAT3,BNIP3,C1QBP,APOBEC3C,KPNB1,TNPO1,IPO5,KRT19,GRB2,DICER1,LGALS1,ABCE1,LYN
GO:0044403	symbiont process	0.0001385	0.809	0.005541	0.05126	45	808	SEH1L,CLEC5A,RPS23,HMGA1,PFN1,MAVS,FCN1,PIK3R1,SCD,CCL2,MMP9,VDAC1,SYNCRIP,HSP90AB1,MPO,CUL4A,VIM,DERL1,HACD3,PPIB,SP110,YWHAB,THEM4,TBK1,FUCA2,EIF3G,CTSG,MYC,NCKAP1,PSMB2,ITGA5,ITGAV,STAT3,BNIP3,C1QBP,APOBEC3C,KPNB1,TNPO1,IPO5,KRT19,GRB2,DICER1,LGALS1,ABCE1,LYN
GO:0072350	tricarboxylic acid metabolic process	0.0001542	0.9008	0.006096	0.05639	7	38	ACLY,ACO2,MDH2,FH,IDH3A,STAT5A,DLAT
GO:0043434	response to peptide hormone	0.0001544	0.9022	0.006096	0.05639	29	442	PDE3B,MAX,ADCY7,SORT1,FBN1,PIK3R1,UCHL3,PKLR,PKM,CCL2,PLD1,SLC25A33,ANXA5,PPAT,SMARCC1,PRKAR2A,PRKCA,APPL1,ATP2A2,STAT3,STAT5A,TBC1D4,EIF2B3,RAB31,GRB2,GSTP1,NAMPT,EGR1,LYN
GO:0043207	response to external biotic stimulus	0.0001659	0.9691	0.006461	0.05976	52	986	SEH1L,CLEC7A,HMGA1,TLR8,PLAC8,S100A8,S100A9,S100A12,FCER1G,MGST1,MAVS,SCD,PKLR,CCL2,CCR7,PLD1,MPO,ANXA5,ZCCHC17,SAMHD1,APP,SP110,POLR3B,TBK1,PRKCA,FUCA2,ATP1B1,CTSG,SNRPD1,PROS1,TNIK,DHX36,NAIP,NCL,ITGAV,STAP1,BNIP3,PTPRC,MAPKAPK3,C1QBP,APOBEC3C,DOCK2,TSPAN32,DICER1,GSTP1,CD14,ABCE1,TSPAN6,LYN,DDX21,LYZ,ENO1
GO:0051707	response to other organism	0.0001659	0.9691	0.006461	0.05976	52	986	SEH1L,CLEC7A,HMGA1,TLR8,PLAC8,S100A8,S100A9,S100A12,FCER1G,MGST1,MAVS,SCD,PKLR,CCL2,CCR7,PLD1,MPO,ANXA5,ZCCHC17,SAMHD1,APP,SP110,POLR3B,TBK1,PRKCA,FUCA2,ATP1B1,CTSG,SNRPD1,PROS1,TNIK,DHX36,NAIP,NCL,ITGAV,STAP1,BNIP3,PTPRC,MAPKAPK3,C1QBP,APOBEC3C,DOCK2,TSPAN32,DICER1,GSTP1,CD14,ABCE1,TSPAN6,LYN,DDX21,LYZ,ENO1
GO:0043648	dicarboxylic acid metabolic process	0.0001705	0.9964	0.006599	0.06104	12	110	ACLY,MDH2,ME2,SLC25A32,FH,IDH3A,MTHFD1,ATIC,STAT5A,GLUD2,GOT2,QPRT
GO:0080134	regulation of response to stress	0.0001771	1	0.006806	0.06296	75	1579	SEH1L,HSP90B1,ABAT,PARK7,SERPINF1,CD109,IMPACT,CLEC7A,HMGA1,TLR8,PHB,TXN,S100A8,S100A9,S100A12,PNPT1,FCER1G,MAVS,FCN1,PIK3R1,ABRAXAS1,CCL2,CCR7,PLEK,ALOX12,VDAC1,HSP90AB1,CUL4A,HACD3,ANXA2,ANXA5,BAG3,RICTOR,ZCCHC17,SAMHD1,SKIL,POLR3B,TBK1,PRKCA,ATP1B1,SNRPD1,CTSS,PROS1,SNX5,MYC,TNIK,ATR,SPP1,RSL1D1,STK26,PSMB2,PSMC4,PDCD4,SMYD2,STAT5A,BNIP3,PTPRJ,MAPKAPK3,TBC1D12,C1QBP,DOCK2,PLA2G7,ARMT1,TSPAN32,…
GO:0031647	regulation of protein stability	0.0001783	1	0.006811	0.063	19	237	GTPBP4,CCT3,PARK7,PFN1,PHB,PIK3R1,ZSWIM7,HSP90AB1,FLNA,NAA15,DERL1,USP28,BAG3,CCT7,PPIB,CCT8,ATP1B1,NCKAP1,QRSL1
GO:0009611	response to wounding	0.0001916	1	0.007269	0.06724	51	967	ABAT,PARK7,MAX,SERPINF1,CD109,FABP5,PHB,S100A8,S100A9,S100A12,FCER1G,PIK3R1,PKM,AIF1,CCL2,CCR7,PLEK,ALOX12,FLNA,ANXA2,ANXA5,RICTOR,GATA5,MTR,PRKAR2A,PRKCA,CTSS,PROS1,MYC,PRTN3,SPP1,NAIP,ITGA5,STAT5A,METAP1,PTPRJ,C1QBP,PLA2G7,TSPAN32,LCP1,DICER1,LGALS1,TGFBR1,GSTP1,THBS1,LMAN1,TIMP3,LOX,LYN,HBE1,HBG1
GO:0050900	leukocyte migration	0.0002222	1	0.008357	0.07731	26	386	S100A8,S100A9,S100A12,FCER1G,PIK3R1,AIF1,CCL2,CCR7,MMP9,MSN,SLC16A1,PRKCA,ATP1B1,PROS1,SPP1,ITGA5,ITGAV,STAP1,STK10,PTPRJ,C1QBP,PLA2G7,GRB2,OLR1,THBS1,LYN
GO:0090501	RNA phosphodiester bond hydrolysis	0.0002231	1	0.008357	0.07731	13	130	RIDA,PNPT1,XRN2,NOB1,DIS3,NOP14,TSR1,BMS1,RRS1,UTP20,EXOSC3,DICER1,RNASE6
GO:0006839	mitochondrial transport	0.0002318	1	0.008626	0.07979	21	282	HK2,TOMM5,SLC25A32,PNPT1,MIPEP,ACAA2,TOMM40,HSPA4,VDAC1,SLC25A33,CPT2,YWHAB,THEM4,TIMM50,ATP5MC1,STARD7,STAT3,BNIP3,PMPCA,PPIF,PDCD5
GO:1901607	alpha-amino acid biosynthetic process	0.0002361	1	0.008732	0.08077	10	82	PARK7,AHCY,MTHFD1,MTR,CTH,ATIC,PHGDH,GLUD2,DHPS,GOT2
GO:0071375	cellular response to peptide hormone stimulus	0.0002395	1	0.0088	0.0814	23	324	PDE3B,MAX,ADCY7,FBN1,PIK3R1,UCHL3,PKLR,CCL2,SLC25A33,ANXA5,PPAT,SMARCC1,PRKAR2A,PRKCA,APPL1,STAT3,STAT5A,TBC1D4,RAB31,GRB2,GSTP1,NAMPT,LYN
GO:0032204	regulation of telomere maintenance	0.000258	1	0.009421	0.08715	9	68	CCT3,CCT7,CCT8,MYC,DHX36,ATR,GNL3,NAT10,AURKB
GO:0006188	IMP biosynthetic process	0.0002632	1	0.009552	0.08836	4	11	PFAS,PPAT,PAICS,ATIC
GO:0032868	response to insulin	0.0002858	1	0.01031	0.09535	20	266	PDE3B,MAX,SORT1,PIK3R1,UCHL3,PKLR,PKM,CCL2,SLC25A33,PPAT,SMARCC1,PRKCA,APPL1,TBC1D4,RAB31,GRB2,GSTP1,NAMPT,EGR1,LYN
GO:0010243	response to organonitrogen compound	0.0003382	1	0.01212	0.1121	46	866	HSP90B1,ABAT,PDE3B,MAX,IMPACT,HMGCS1,ADCY7,EFTUD2,SORT1,FBN1,MGST1,PIK3R1,UCHL3,PKLR,PKM,AIF1,CCL2,ABCG2,PLD1,HOMER1,SLC25A33,ANXA5,PPAT,APP,SMARCC1,PRKAR2A,PRKCA,APPL1,ATP2A2,MYC,PSMB2,NAIP,STAT3,STAT5A,TBC1D4,EIF2B3,IPO5,GPI,RAB31,GRB2,LDHA,GSTP1,NAMPT,EGR1,TIMP3,LYN
GO:1901575	organic substance catabolic process	0.0003422	1	0.01219	0.1128	86	1910	HSP90B1,ABAT,PDE3B,HK2,CTSC,PARK7,RPS23,PGK1,FABP5,PHB,FAH,PNPT1,UCHL3,AHCY,PKLR,LYPLA1,PKM,ACAA2,PLD1,ALDH1B1,ALDOA,ALDOC,SLC25A17,HSP90AB1,MPI,CUL4A,FLNA,XRN2,TRIB2,DERL1,LIN28B,RCHY1,ANXA2,USP28,EGLN1,SAMHD1,PPAT,CPT2,PNKD,SKP2,DIS3,MSN,VCAN,DZIP3,NT5C2,SMARCC1,CTH,FUCA2,CTSS,SORD,MYC,PSMB2,PSMC4,BCAT1,BCKDHB,MCCC2,STAT3,BNIP3,SUPV3L1,GLUD2,DHPS,PRPF19,APOBEC3C,GOT2,SLC27A2,KPNB1,ENTPD7,GPI,PL…
GO:0044764	multi-organism cellular process	0.0003856	1	0.01366	0.1263	42	773	SEH1L,CLEC5A,RPS23,HMGA1,PFN1,MAVS,FCN1,PIK3R1,CCL2,MMP9,VDAC1,SYNCRIP,HSP90AB1,CUL4A,VIM,DERL1,HACD3,PPIB,SP110,YWHAB,THEM4,TBK1,EIF3G,MYC,NCKAP1,PSMB2,ITGA5,ITGAV,STAT3,BNIP3,C1QBP,APOBEC3C,KPNB1,TNPO1,IPO5,KRT19,GRB2,DICER1,LGALS1,ABCE1,TSPAN6,LYN
GO:0097529	myeloid leukocyte migration	0.0003884	1	0.01367	0.1265	15	174	S100A8,S100A9,S100A12,FCER1G,AIF1,CCL2,CCR7,PRKCA,SPP1,STAP1,PTPRJ,C1QBP,PLA2G7,THBS1,LYN
GO:0010758	regulation of macrophage chemotaxis	0.0003965	1	0.01379	0.1275	5	21	CCL2,CCR7,STAP1,PTPRJ,THBS1
GO:0051289	protein homotetramerization	0.0003989	1	0.01379	0.1275	9	72	ALDOA,ALDOC,NAXE,SAMHD1,PPAT,CRYZ,CTH,IMPDH2,DHPS
GO:0032760	positive regulation of tumor necrosis factor production	0.0003989	1	0.01379	0.1275	9	72	FCER1G,MAVS,PIK3R1,CCL2,CCR7,CYBB,NCL,THBS1,CD14
GO:0009108	coenzyme biosynthetic process	0.0004011	1	0.01379	0.1275	13	138	GPHN,RFK,PDK1,ACOT9,ACLY,SCD,THEM4,MTHFD1,ATIC,NDUFA9,DLAT,NAMPT,QPRT
GO:0016052	carbohydrate catabolic process	0.0004275	1	0.01461	0.1351	14	157	HK2,PGK1,PKLR,PKM,ALDOA,ALDOC,MPI,SORD,MYC,STAT3,GPI,LDHA,GYG1,ENO1
GO:0009607	response to biotic stimulus	0.0004382	1	0.01489	0.1377	52	1027	SEH1L,CLEC7A,HMGA1,TLR8,PLAC8,S100A8,S100A9,S100A12,FCER1G,MGST1,MAVS,SCD,PKLR,CCL2,CCR7,PLD1,MPO,ANXA5,ZCCHC17,SAMHD1,APP,SP110,POLR3B,TBK1,PRKCA,FUCA2,ATP1B1,CTSG,SNRPD1,PROS1,TNIK,DHX36,NAIP,NCL,ITGAV,STAP1,BNIP3,PTPRC,MAPKAPK3,C1QBP,APOBEC3C,DOCK2,TSPAN32,DICER1,GSTP1,CD14,ABCE1,TSPAN6,LYN,DDX21,LYZ,ENO1
GO:0034644	cellular response to UV	0.0004426	1	0.01495	0.1383	9	73	IMPACT,PIK3R1,USP28,EI24,MYC,ATR,BCAT1,RUVBL2,AURKB
GO:1903034	regulation of response to wounding	0.0004592	1	0.01542	0.1426	29	472	ABAT,PARK7,SERPINF1,CD109,PHB,S100A8,S100A9,S100A12,FCER1G,CCL2,CCR7,PLEK,ALOX12,ANXA2,ANXA5,RICTOR,PRKCA,CTSS,PROS1,MYC,SPP1,STAT5A,PTPRJ,C1QBP,PLA2G7,DICER1,GSTP1,THBS1,LYN
GO:0051897	positive regulation of protein kinase B signaling	0.0004617	1	0.01542	0.1426	10	89	PARK7,TXN,CCR7,RICTOR,PTPRJ,C1QBP,MYDGF,TGFBR1,THBS1,HCLS1
GO:1901653	cellular response to peptide	0.000474	1	0.01568	0.145	23	340	PDE3B,MAX,ADCY7,FBN1,PIK3R1,UCHL3,PKLR,CCL2,SLC25A33,ANXA5,PPAT,SMARCC1,PRKAR2A,PRKCA,APPL1,STAT3,STAT5A,TBC1D4,RAB31,GRB2,GSTP1,NAMPT,LYN
GO:0009719	response to endogenous stimulus	0.0004771	1	0.01568	0.145	79	1740	UBA5,NR2F6,HSP90B1,ABAT,PDE3B,PARK7,MAX,SERPINF1,CD109,IMPACT,HMGCS1,ADCY7,PHB,EFTUD2,SORT1,CITED2,FBN1,FCER1G,MGST1,PIK3R1,HPGD,UCHL3,PKLR,PKM,AIF1,CCL2,AK2,CCR7,ABCG2,PLD1,MMP14,HOMER1,ANXA2,SLC25A33,ANXA5,EPB41L5,GATA5,PPAT,APP,SKIL,SKP2,MSN,SMARCC1,PRKAR2A,PRKCA,APPL1,ATP2A2,CTSS,SORD,MYC,SPP1,PSMB2,NAIP,RUVBL2,STAT3,STAT5A,IQGAP1,TBC1D4,DHCR24,EIF2B3,IPO5,GPI,RAB31,KRT19,GRB2,LDHA,CBL,TGFBR1…
GO:0070527	platelet aggregation	0.0004776	1	0.01568	0.145	8	59	ABAT,PLEK,ALOX12,FLNA,PRKCA,METAP1,TSPAN32,LYN
GO:1903557	positive regulation of tumor necrosis factor superfamily cytokine production	0.0004901	1	0.016	0.148	9	74	FCER1G,MAVS,PIK3R1,CCL2,CCR7,CYBB,NCL,THBS1,CD14
GO:0000470	maturation of LSU-rRNA	0.0005	1	0.01623	0.1502	5	22	GTPBP4,WDR12,RSL1D1,MAK16,PES1
GO:0016032	viral process	0.0005071	1	0.01637	0.1514	41	759	SEH1L,CLEC5A,RPS23,HMGA1,PFN1,MAVS,FCN1,PIK3R1,CCL2,MMP9,VDAC1,SYNCRIP,HSP90AB1,CUL4A,VIM,DERL1,HACD3,PPIB,SP110,YWHAB,THEM4,TBK1,EIF3G,MYC,NCKAP1,PSMB2,ITGA5,ITGAV,STAT3,BNIP3,C1QBP,APOBEC3C,KPNB1,TNPO1,IPO5,KRT19,GRB2,DICER1,LGALS1,ABCE1,LYN
GO:0006107	oxaloacetate metabolic process	0.0005425	1	0.01734	0.1604	4	13	ACLY,MDH2,STAT5A,GOT2
GO:1901652	response to peptide	0.0005438	1	0.01734	0.1604	29	477	PDE3B,MAX,ADCY7,SORT1,FBN1,PIK3R1,UCHL3,PKLR,PKM,CCL2,PLD1,SLC25A33,ANXA5,PPAT,SMARCC1,PRKAR2A,PRKCA,APPL1,ATP2A2,STAT3,STAT5A,TBC1D4,EIF2B3,RAB31,GRB2,GSTP1,NAMPT,EGR1,LYN
GO:0006897	endocytosis	0.0005485	1	0.01734	0.1604	37	665	HSP90B1,CORO1C,CLEC7A,LDLRAD3,SORT1,FCER1G,FCN1,PIK3R1,AIF1,CCL2,BIN2,CCR7,PLD1,HSP90AB1,ANXA2,APP,MARCH3,STON2,PRKCA,PROS1,SNX5,PRTN3,NCKAP1,NCL,ITGAV,STAP1,MAPKAPK3,DOCK2,RAB31,CANX,GRB2,CBL,OLR1,ACTR2,THBS1,CD14,LYN
GO:0042060	wound healing	0.000549	1	0.01734	0.1604	33	570	ABAT,CD109,S100A8,S100A9,FCER1G,PIK3R1,PKM,PLEK,ALOX12,FLNA,ANXA2,ANXA5,GATA5,PRKAR2A,PRKCA,PROS1,MYC,PRTN3,ITGA5,METAP1,PTPRJ,C1QBP,TSPAN32,LCP1,DICER1,TGFBR1,THBS1,LMAN1,TIMP3,LOX,LYN,HBE1,HBG1
GO:0000966	RNA 5'-end processing	0.0005688	1	0.01787	0.1653	3	6	PNPT1,NOP14,UTP20
GO:0016051	carbohydrate biosynthetic process	0.0005859	1	0.01831	0.1694	17	220	MDH2,PGK1,PLEK,ALDOA,ALDOC,GSTO1,HS2ST1,SORD,GBE1,SDHAF3,ALG1,GOT2,GPI,TKT,GYG1,SLC35B4,ENO1
GO:0006360	transcription by RNA polymerase I	0.0006005	1	0.01859	0.172	8	61	POLR1B,TAF1D,FLNA,POLR1C,NCL,TWISTNB,HEATR1,TFAM
GO:0032206	positive regulation of telomere maintenance	0.0006024	1	0.01859	0.172	7	47	CCT3,CCT7,CCT8,DHX36,ATR,GNL3,AURKB
GO:0007599	hemostasis	0.0006075	1	0.01859	0.172	24	368	ABAT,S100A9,FCER1G,PIK3R1,PLEK,ALOX12,FLNA,ANXA2,ANXA5,GATA5,PRKAR2A,PRKCA,PROS1,PRTN3,METAP1,PTPRJ,C1QBP,GPI,TSPAN32,THBS1,LMAN1,LYN,HBE1,HBG1
GO:1901699	cellular response to nitrogen compound	0.0006078	1	0.01859	0.172	34	597	HSP90B1,PDE3B,MAX,IMPACT,ADCY7,FBN1,MAVS,PIK3R1,UCHL3,PKLR,AIF1,CCL2,LIN28B,SLC25A33,ANXA5,PPAT,APP,MTR,SMARCC1,PRKAR2A,PRKCA,APPL1,STAT3,STAT5A,TBC1D4,IPO5,RAB31,GRB2,DICER1,GSTP1,THBS1,NAMPT,EGR1,LYN
GO:0071621	granulocyte chemotaxis	0.000667	1	0.0203	0.1878	11	110	S100A8,S100A9,S100A12,FCER1G,CCL2,CCR7,PRKCA,SPP1,PTPRJ,C1QBP,THBS1
GO:0052548	regulation of endopeptidase activity	0.0006769	1	0.02049	0.1896	25	393	PARK7,SERPINF1,CD109,S100A8,S100A9,SERPINB6,SERPINI1,MMP9,PRDX5,ALOX12,APP,PROS1,MYC,NAIP,STAT3,DHCR24,FAM162A,GPI,THBS1,TIMP3,PEBP1,PDCD5,SERPINB1,ROBO1,PSME3
GO:0052547	regulation of peptidase activity	0.0006922	1	0.02085	0.1928	26	416	PARK7,SERPINF1,CD109,S100A8,S100A9,SERPINB6,SERPINI1,MMP9,PRDX5,MMP14,ALOX12,APP,PROS1,MYC,NAIP,STAT3,DHCR24,FAM162A,GPI,THBS1,TIMP3,PEBP1,PDCD5,SERPINB1,ROBO1,PSME3
GO:0010759	positive regulation of macrophage chemotaxis	0.0007408	1	0.02208	0.2043	4	14	CCL2,CCR7,PTPRJ,THBS1
GO:0060252	positive regulation of glial cell proliferation	0.0007408	1	0.02208	0.2043	4	14	PLAG1,VIM,MYC,LYN
GO:0071731	response to nitric oxide	0.0007664	1	0.02273	0.2103	5	24	CCR7,EGLN1,MTR,ITGAV,THBS1
GO:1901605	alpha-amino acid metabolic process	0.0008149	1	0.02405	0.2225	18	247	PARK7,PFAS,FAH,SLC25A32,AHCY,ERO1A,EGLN1,PPAT,MTHFD1,MTR,CTH,ATIC,MCCC2,PHGDH,STAT5A,GLUD2,DHPS,GOT2
GO:0043457	regulation of cellular respiration	0.0009336	1	0.02727	0.2523	5	25	PARK7,PNPT1,MYC,BNIP3,TRAP1
GO:0034661	ncRNA catabolic process	0.0009336	1	0.02727	0.2523	5	25	PNPT1,LIN28B,DIS3,EXOSC3,DICER1
GO:0019249	lactate biosynthetic process	0.0009723	1	0.02781	0.2573	3	7	PARK7,LDHA,LDHB
GO:0009438	methylglyoxal metabolic process	0.0009723	1	0.02781	0.2573	3	7	PARK7,PNKD,GPI
GO:0007000	nucleolus organization	0.0009723	1	0.02781	0.2573	3	7	NOLC1,POLR1B,PES1
GO:0050667	homocysteine metabolic process	0.0009853	1	0.02781	0.2573	4	15	AHCY,MTHFD1,MTR,CTH
GO:1904872	regulation of telomerase RNA localization to Cajal body	0.0009853	1	0.02781	0.2573	4	15	CCT3,CCT7,CCT8,RUVBL2
GO:1904874	positive regulation of telomerase RNA localization to Cajal body	0.0009853	1	0.02781	0.2573	4	15	CCT3,CCT7,CCT8,RUVBL2
GO:0015671	oxygen transport	0.0009853	1	0.02781	0.2573	4	15	MYC,HBE1,HBG1,HBZ
GO:0000962	positive regulation of mitochondrial RNA catabolic process	0.001011	1	0.02813	0.2602	2	2	PNPT1,SUPV3L1
GO:0000958	mitochondrial mRNA catabolic process	0.001011	1	0.02813	0.2602	2	2	PNPT1,SUPV3L1
GO:0000961	negative regulation of mitochondrial RNA catabolic process	0.001011	1	0.02813	0.2602	2	2	LRPPRC,SLIRP
GO:0010638	positive regulation of organelle organization	0.001043	1	0.02888	0.2671	34	616	MNS1,CCT3,PARK7,PFN1,CCR7,PLEK,MMP9,ANXA2,CCT7,RICTOR,YWHAB,MSN,TET1,CCT8,DHX36,ATR,NCKAP1,IQGAP2,STARD7,RUVBL2,STAP1,BNIP3,C1QBP,GNL3,FAM162A,GRB2,LCP1,ACTR2,PPIF,LMAN1,PEBP1,PDCD5,HCLS1,AURKB
GO:0019319	hexose biosynthetic process	0.001071	1	0.02952	0.2731	10	99	MDH2,PGK1,ALDOA,ALDOC,SORD,SDHAF3,GOT2,GPI,SLC35B4,ENO1
GO:0043039	tRNA aminoacylation	0.00112	1	0.03073	0.2842	7	52	WARS2,LRRC47,PPA1,IARS2,DARS,GATC,QRSL1
GO:0007596	blood coagulation	0.001152	1	0.03146	0.291	23	363	ABAT,S100A9,FCER1G,PIK3R1,PLEK,ALOX12,FLNA,ANXA2,ANXA5,GATA5,PRKAR2A,PRKCA,PROS1,PRTN3,METAP1,PTPRJ,C1QBP,TSPAN32,THBS1,LMAN1,LYN,HBE1,HBG1
GO:0006986	response to unfolded protein	0.001181	1	0.03211	0.297	14	174	HSP90B1,MBTPS2,PIK3R1,CCL2,HSPA4,HSP90AB1,DERL1,HSPA4L,ERO1A,CTH,MBTPS1,MYDGF,TMEM33,THBS1
GO:0000387	spliceosomal snRNP assembly	0.001242	1	0.03353	0.3102	6	39	PRMT5,GEMIN5,SNRPC,SNRPD1,PRPF19,GEMIN7
GO:0090502	RNA phosphodiester bond hydrolysis, endonucleolytic	0.001245	1	0.03353	0.3102	8	68	RIDA,NOB1,NOP14,TSR1,BMS1,RRS1,UTP20,DICER1
GO:0043038	amino acid activation	0.001256	1	0.03367	0.3115	7	53	WARS2,LRRC47,PPA1,IARS2,DARS,GATC,QRSL1
GO:0050857	positive regulation of antigen receptor-mediated signaling pathway	0.001281	1	0.03373	0.312	4	16	CCR7,STAP1,PTPRC,LYN
GO:0090672	telomerase RNA localization	0.001281	1	0.03373	0.312	4	16	CCT3,CCT7,CCT8,RUVBL2
GO:0090670	RNA localization to Cajal body	0.001281	1	0.03373	0.312	4	16	CCT3,CCT7,CCT8,RUVBL2
GO:0090671	telomerase RNA localization to Cajal body	0.001281	1	0.03373	0.312	4	16	CCT3,CCT7,CCT8,RUVBL2
GO:0060251	regulation of glial cell proliferation	0.001347	1	0.0353	0.3265	5	27	PLAG1,VIM,MYC,DICER1,LYN
GO:0097190	apoptotic signaling pathway	0.001367	1	0.03565	0.3298	34	626	PDK1,CTSC,PARK7,SORT1,S100A8,S100A9,PIK3R1,ACAA2,MMP9,CUL4A,USP28,ERO1A,BAG3,EI24,SKIL,YWHAB,TIMM50,PRKCA,APPL1,CTH,MYC,ITGAV,BNIP3,PTPRC,FAM162A,PPIF,TGFBR1,GSTP1,THBS1,TRAP1,CD14,TIMP3,PDCD5,PSME3
GO:0050817	coagulation	0.001379	1	0.03582	0.3313	23	368	ABAT,S100A9,FCER1G,PIK3R1,PLEK,ALOX12,FLNA,ANXA2,ANXA5,GATA5,PRKAR2A,PRKCA,PROS1,PRTN3,METAP1,PTPRJ,C1QBP,TSPAN32,THBS1,LMAN1,LYN,HBE1,HBG1
GO:0032870	cellular response to hormone stimulus	0.001442	1	0.03729	0.345	36	677	UBA5,NR2F6,PDE3B,PARK7,MAX,SERPINF1,HMGCS1,ADCY7,PHB,FBN1,PIK3R1,UCHL3,PKLR,AIF1,CCL2,ABCG2,SLC25A33,ANXA5,PPAT,SKP2,MSN,SMARCC1,PRKAR2A,PRKCA,APPL1,CTSS,NAIP,RUVBL2,STAT3,STAT5A,TBC1D4,RAB31,GRB2,GSTP1,NAMPT,LYN
GO:0050764	regulation of phagocytosis	0.001465	1	0.03762	0.348	9	86	FCER1G,CCL2,CCR7,PLD1,PROS1,PRTN3,ITGAV,STAP1,DOCK2
GO:0045333	cellular respiration	0.001468	1	0.03762	0.348	14	178	ACO2,PARK7,MDH2,PNPT1,FH,COX6A1,IDH3A,MYC,NDUFA9,BNIP3,DLAT,TRAP1,OXA1L,NDUFAF1
GO:0009628	response to abiotic stimulus	0.001487	1	0.03794	0.351	57	1216	SEH1L,NR2F6,HSP90B1,ABAT,PDK1,DNAJA2,SERPINF1,IMPACT,HMGCS1,TLR8,PLAC8,TXN,CITED2,SERPINB6,PIK3R1,ABRAXAS1,AHCY,PKLR,PKM,AIF1,CCL2,ACAA2,MMP14,HSPA4,HSP90AB1,MPO,USP28,ERO1A,EGLN1,BAG3,EI24,APP,TANC1,ATP1B1,CTSS,SORD,CYBB,MYC,ATR,BCAT1,RUVBL2,METAP1,BNIP3,PTPRC,EIF2B3,DENND5A,FAM162A,KRT13,GRB2,HIF3A,LDHA,THBS1,CD14,EGR1,TIMP3,LYN,AURKB
GO:1904871	positive regulation of protein localization to Cajal body	0.00152	1	0.03827	0.354	3	8	CCT3,CCT7,CCT8
GO:1904869	regulation of protein localization to Cajal body	0.00152	1	0.03827	0.354	3	8	CCT3,CCT7,CCT8
GO:0000447	endonucleolytic cleavage in ITS1 to separate SSU-rRNA from 5.8S rRNA and LSU-rRNA from tricistronic rRNA transcript (SSU-rRNA, 5.8S rRNA, LSU-rRNA)	0.00152	1	0.03827	0.354	3	8	NOP14,RRS1,UTP20
GO:0051346	negative regulation of hydrolase activity	0.001554	1	0.03897	0.3604	25	417	PARK7,SERPINF1,CD109,SORT1,SERPINB6,SERPINI1,MMP9,PRDX5,EGLN1,APP,PROS1,IQGAP2,RRP1B,NAIP,IQGAP1,DHCR24,IPO5,GPI,PPIF,THBS1,OXA1L,TIMP3,PEBP1,SERPINB1,SPRED1
GO:0044272	sulfur compound biosynthetic process	0.001588	1	0.03936	0.3641	16	220	PDK1,ACOT9,ACLY,MGST1,SCD,AHCY,GSTO1,THEM4,MTHFD1,HS2ST1,VCAN,MTR,CTH,HPGDS,DLAT,GSTP1
GO:0072593	reactive oxygen species metabolic process	0.001589	1	0.03936	0.3641	18	262	RFK,HK2,PARK7,AIF1,PRDX5,ALOX12,VDAC1,HSP90AB1,MPO,SLC25A33,CYBB,STAT3,BNIP3,GRB2,GSTP1,THBS1,TRAP1,PRDX1
GO:0098869	cellular oxidant detoxification	0.00159	1	0.03936	0.3641	9	87	PARK7,S100A9,MGST1,PRDX5,GSTO1,MPO,FAM213A,GSR,PRDX1
GO:0030595	leukocyte chemotaxis	0.001625	1	0.04005	0.3705	15	200	S100A8,S100A9,S100A12,FCER1G,AIF1,CCL2,CCR7,PRKCA,SPP1,STAP1,PTPRJ,C1QBP,PLA2G7,THBS1,LYN
GO:0006089	lactate metabolic process	0.001634	1	0.04013	0.3712	4	17	PARK7,PNKD,LDHA,LDHB
GO:0097530	granulocyte migration	0.001676	1	0.04081	0.3775	11	123	S100A8,S100A9,S100A12,FCER1G,CCL2,CCR7,PRKCA,SPP1,PTPRJ,C1QBP,THBS1
GO:0032680	regulation of tumor necrosis factor production	0.001676	1	0.04081	0.3775	11	123	FCER1G,MAVS,PIK3R1,CCL2,CCR7,GPNMB,CYBB,NCL,GSTP1,THBS1,CD14
GO:0051188	cofactor biosynthetic process	0.001719	1	0.04153	0.3842	14	181	GPHN,RFK,PDK1,ACOT9,ACLY,SCD,ALAS1,THEM4,MTHFD1,ATIC,NDUFA9,DLAT,NAMPT,QPRT
GO:0006767	water-soluble vitamin metabolic process	0.001723	1	0.04153	0.3842	9	88	RFK,SLC25A32,GSTO1,NAXE,SLC2A3,MTHFD1,MTR,MCCC2,NAMPT
GO:0050878	regulation of body fluid levels	0.001727	1	0.04153	0.3842	30	538	ABAT,HK2,ADCY7,S100A9,FCER1G,PIK3R1,SCD,UMPS,PLEK,ALOX12,FLNA,ANXA2,ANXA5,GATA5,PPAT,PRKAR2A,PRKCA,PROS1,PRTN3,STAT5A,METAP1,PTPRJ,C1QBP,GPI,TSPAN32,THBS1,LMAN1,LYN,HBE1,HBG1
GO:0002757	immune response-activating signal transduction	0.001735	1	0.04156	0.3844	27	467	HSP90B1,CLEC7A,TLR8,FCER1G,MAVS,FCN1,PIK3R1,CCR7,MNDA,HSP90AB1,TBK1,CTSS,NCKAP1,PSMB2,PSMC4,STAP1,PTPRC,PTPRJ,MAPKAPK3,C1QBP,GRB2,ACTR2,CD14,TSPAN6,ELF1,PSME3,LYN
GO:0032640	tumor necrosis factor production	0.001789	1	0.04267	0.3947	11	124	FCER1G,MAVS,PIK3R1,CCL2,CCR7,GPNMB,CYBB,NCL,GSTP1,THBS1,CD14
GO:0050832	defense response to fungus	0.001844	1	0.04381	0.4052	6	42	S100A8,S100A9,S100A12,MPO,APP,CTSG
GO:0071417	cellular response to organonitrogen compound	0.001876	1	0.04417	0.4086	29	517	HSP90B1,PDE3B,MAX,IMPACT,ADCY7,FBN1,PIK3R1,UCHL3,PKLR,AIF1,CCL2,SLC25A33,ANXA5,PPAT,APP,SMARCC1,PRKAR2A,PRKCA,APPL1,STAT3,STAT5A,TBC1D4,IPO5,RAB31,GRB2,GSTP1,NAMPT,EGR1,LYN
GO:0090200	positive regulation of release of cytochrome c from mitochondria	0.001882	1	0.04417	0.4086	5	29	MMP9,BNIP3,FAM162A,PPIF,PDCD5
GO:0006099	tricarboxylic acid cycle	0.001882	1	0.04417	0.4086	5	29	ACO2,MDH2,FH,IDH3A,DLAT
GO:0042255	ribosome assembly	0.001935	1	0.04523	0.4184	7	57	TSR1,MRPL11,BMS1,ERAL1,C1QBP,MRPS7,MRTO4
GO:0040012	regulation of locomotion	0.001969	1	0.04585	0.4241	43	866	GTPBP4,CORO1C,SERPINF1,PFN1,CITED2,FCN1,PIK3R1,AIF1,CCL2,CCR7,PLD1,MMP9,MMP14,ALOX12,VIM,FLNA,ANXA5,EPB41L5,MSN,ARHGDIB,PRKCA,FUCA2,ARHGAP18,MYC,ITGA5,ITGAV,STAP1,STAT3,STAT5A,IQGAP1,STK10,PTPRC,PTPRJ,C1QBP,PLA2G7,LGALS1,TGFBR1,THBS1,EGR1,PLXNC1,ROBO1,LYN,EPCAM
GO:0035966	response to topologically incorrect protein	0.002005	1	0.04637	0.4289	14	184	HSP90B1,MBTPS2,PIK3R1,CCL2,HSPA4,HSP90AB1,DERL1,HSPA4L,ERO1A,CTH,MBTPS1,MYDGF,TMEM33,THBS1
GO:1990748	cellular detoxification	0.002016	1	0.04637	0.4289	9	90	PARK7,S100A9,MGST1,PRDX5,GSTO1,MPO,FAM213A,GSR,PRDX1
GO:0001824	blastocyst development	0.002016	1	0.04637	0.4289	9	90	CITED2,SKIL,TET1,CCNB1IP1,ATP1B1,DAD1,PSMC4,PRPF19,TGFBR1
GO:1903555	regulation of tumor necrosis factor superfamily cytokine production	0.002033	1	0.04639	0.4292	11	126	FCER1G,MAVS,PIK3R1,CCL2,CCR7,GPNMB,CYBB,NCL,GSTP1,THBS1,CD14
GO:0009451	RNA modification	0.002033	1	0.04639	0.4292	11	126	UBA5,FBL,MRM1,PUS7,SYNCRIP,TRMT1,TRUB2,TRMT6,NSUN2,DIMT1,NAT10
GO:0090330	regulation of platelet aggregation	0.00205	1	0.04659	0.4309	4	18	ABAT,ALOX12,PRKCA,LYN
GO:0001666	response to hypoxia	0.002057	1	0.04659	0.4309	20	312	HSP90B1,ABAT,PDK1,CITED2,AHCY,PKLR,PKM,CCL2,ACAA2,MMP14,ERO1A,EGLN1,ATP1B1,CYBB,BNIP3,FAM162A,HIF3A,LDHA,THBS1,EGR1
GO:0034599	cellular response to oxidative stress	0.002078	1	0.04687	0.4336	17	247	PDK1,PARK7,IMPACT,TXN,PNPT1,MGST1,AIF1,PRDX5,MPO,MTR,ATP2A2,STK26,BNIP3,PPIF,THBS1,TRAP1,PRDX1
GO:0006984	ER-nucleus signaling pathway	0.002088	1	0.04692	0.434	6	43	HSP90B1,MBTPS2,CCL2,ATP2A2,MBTPS1,TMEM33
GO:2000145	regulation of cell motility	0.002118	1	0.04742	0.4387	40	793	GTPBP4,CORO1C,SERPINF1,PFN1,CITED2,PIK3R1,AIF1,CCL2,CCR7,PLD1,MMP9,MMP14,ALOX12,VIM,FLNA,ANXA5,EPB41L5,MSN,ARHGDIB,PRKCA,ARHGAP18,MYC,ITGA5,ITGAV,STAP1,STAT3,STAT5A,IQGAP1,STK10,PTPRC,PTPRJ,C1QBP,PLA2G7,TGFBR1,THBS1,EGR1,PLXNC1,ROBO1,LYN,EPCAM
GO:0031349	positive regulation of defense response	0.00214	1	0.04772	0.4414	25	427	HSP90B1,CLEC7A,TLR8,S100A8,S100A9,S100A12,FCER1G,MAVS,FCN1,CCL2,CCR7,POLR3B,TBK1,PRKCA,CTSS,PSMB2,PSMC4,STAT5A,MAPKAPK3,C1QBP,PLA2G7,CD14,TSPAN6,PSME3,LYN
GO:0031347	regulation of defense response	0.002196	1	0.04854	0.449	41	820	HSP90B1,PARK7,SERPINF1,CLEC7A,TLR8,PHB,S100A8,S100A9,S100A12,FCER1G,MAVS,FCN1,CCL2,CCR7,HSP90AB1,ANXA5,RICTOR,ZCCHC17,SAMHD1,POLR3B,TBK1,PRKCA,ATP1B1,SNRPD1,CTSS,PROS1,TNIK,PSMB2,PSMC4,STAT5A,MAPKAPK3,C1QBP,DOCK2,PLA2G7,TSPAN32,DICER1,GSTP1,CD14,TSPAN6,PSME3,LYN
GO:0006610	ribosomal protein import into nucleus	0.002226	1	0.04854	0.449	3	9	KPNB1,TNPO1,IPO5
GO:1904867	protein localization to Cajal body	0.002226	1	0.04854	0.449	3	9	CCT3,CCT7,CCT8
GO:1903405	protein localization to nuclear body	0.002226	1	0.04854	0.449	3	9	CCT3,CCT7,CCT8
GO:1990173	protein localization to nucleoplasm	0.002226	1	0.04854	0.449	3	9	CCT3,CCT7,CCT8
GO:0006108	malate metabolic process	0.002226	1	0.04854	0.449	3	9	MDH2,ME2,FH

## Sheet: GO_BP_AB
ID	Name	p-value	q-value Bonferroni	q-value FDR B&H	q-value FDR B&Y	Hit Count in Query List	Hit Count in Genome	Hit in Query List
GO:0045597	positive regulation of cell differentiation	9.397e-06	0.03932	0.01741	0.1552	31	966	ACHE,BCL11A,GCNT2,MAP3K5,GDPD5,SRGAP2C,KAT2B,BMPR2,SERPINE2,SLC9B2,TSPO,SUCO,FKBP1B,CA2,PNP,VEGFA,SOX6,FOXO3,IFITM1,H2AFY,LGALS3,PPP2R5B,THRB,CD36,CAPRIN2,EIF5A,GLIPR2,CTNNA1,MAP2K2,MMD,CPEB1
GO:0006979	response to oxidative stress	1.073e-05	0.0449	0.01741	0.1552	19	439	TPM1,GCH1,DDIT3,MAP3K5,KAT2B,GCLM,PKD2,ALDH1A1,FKBP1B,CPEB2,FOXO1,FOXO3,SELENOP,FAS,AQP1,MSRB3,CD36,AKR1C3,HBB
GO:0045595	regulation of cell differentiation	1.248e-05	0.05223	0.01741	0.1552	45	1699	HLA-A,ACHE,ADGRG1,BCL11A,GCNT2,DDIT3,MAP3K5,GDPD5,SRGAP2C,KAT2B,BMPR2,SERPINE2,HIST1H4A,SLC9B2,TSPO,AFDN,SUCO,FKBP1B,CA2,PNP,VEGFA,SOX6,FOXO1,FOXO3,IFITM1,H2AFY,SRGAP2,FAS,AQP3,LGALS3,NDFIP1,PPP2R5B,THRB,TRIB3,ABCA5,CD36,CAPRIN2,EIF5A,CD44,LRP1,GLIPR2,CTNNA1,MAP2K2,MMD,CPEB1
GO:0072488	ammonium transmembrane transport	1.965e-05	0.08223	0.02056	0.1833	5	25	AQP1,RHCE,RHD,SLC22A16,SLC22A4
GO:2000377	regulation of reactive oxygen species metabolic process	3.374e-05	0.1412	0.02172	0.1936	11	177	ESR2,GCH1,PKD2,TSPO,FOXO1,FOXO3,SLC18A2,CD36,EIF5A,AKR1C3,HBB
GO:0015696	ammonium transport	3.835e-05	0.1604	0.02172	0.1936	9	119	FCER1A,FCGR2A,AQP1,LGALS3,RHCE,RHD,SLC22A16,SLC18A2,SLC22A4
GO:0034614	cellular response to reactive oxygen species	4.007e-05	0.1676	0.02172	0.1936	10	149	TPM1,GCH1,MAP3K5,PKD2,FOXO1,FOXO3,FAS,AQP1,CD36,AKR1C3
GO:0006342	chromatin silencing	4.667e-05	0.1953	0.02172	0.1936	9	122	HIST1H2AK,HIST1H2AJ,HIST1H2AM,HIST1H3A,HIST1H3C,HIST1H3B,HIST1H4A,H2AFY,HIST1H2AD
GO:0000302	response to reactive oxygen species	4.684e-05	0.196	0.02172	0.1936	13	252	TPM1,GCH1,DDIT3,MAP3K5,PKD2,FKBP1B,FOXO1,FOXO3,FAS,AQP1,CD36,AKR1C3,HBB
GO:0009890	negative regulation of biosynthetic process	5.191e-05	0.2172	0.02172	0.1936	42	1635	MXD3,WWC3,ESR2,BCL11A,DDIT3,CREBRF,HIST1H2AK,HIST1H2AJ,HIST1H2AM,BMPR2,HIST1H3A,HIST1H3C,NFIA,HIST1H3B,HIST1H4A,NFIC,NFIX,TSPO,JAZF1,FHL2,VEGFA,SOX6,CPEB2,FOXO1,FOXO3,MARCH8,H2AFY,CBX4,IFI27,MOSPD1,THRB,TRIB3,SLC18A2,CD36,CPEB4,CAPRIN2,HIST1H1B,AKR1C3,HIST1H2AD,MAP2K2,ENG,CPEB1
GO:0015850	organic hydroxy compound transport	6.97e-05	0.2916	0.02476	0.2208	13	262	AKR1C1,FCER1A,FCGR2A,TSPO,AQP1,AQP3,LGALS3,SLC22A16,ABCA5,SLC18A2,CD36,SLC22A4,LRP1
GO:0019755	one-carbon compound transport	7.101e-05	0.2971	0.02476	0.2208	4	17	CA2,AQP1,AQP3,SLC14A1
GO:2000113	negative regulation of cellular macromolecule biosynthetic process	8.424e-05	0.3525	0.02548	0.2272	38	1452	MXD3,WWC3,ESR2,BCL11A,DDIT3,CREBRF,HIST1H2AK,HIST1H2AJ,HIST1H2AM,BMPR2,HIST1H3A,HIST1H3C,NFIA,HIST1H3B,HIST1H4A,NFIC,NFIX,JAZF1,FHL2,VEGFA,SOX6,CPEB2,FOXO1,FOXO3,H2AFY,CBX4,IFI27,MOSPD1,THRB,TRIB3,CD36,CPEB4,CAPRIN2,HIST1H1B,HIST1H2AD,MAP2K2,ENG,CPEB1
GO:2000766	negative regulation of cytoplasmic translation	8.527e-05	0.3568	0.02548	0.2272	3	7	CPEB2,CPEB4,CPEB1
GO:0070293	renal absorption	0.0001132	0.4736	0.02965	0.2644	4	19	AQP1,AQP3,AKR1C3,HBB
GO:0045814	negative regulation of gene expression, epigenetic	0.0001148	0.4802	0.02965	0.2644	9	137	HIST1H2AK,HIST1H2AJ,HIST1H2AM,HIST1H3A,HIST1H3C,HIST1H3B,HIST1H4A,H2AFY,HIST1H2AD
GO:0045815	positive regulation of gene expression, epigenetic	0.000122	0.5104	0.02965	0.2644	7	81	KAT2B,HIST1H3A,HIST1H3C,SLC50A1,HIST1H3B,HIST1H4A,H2AFY
GO:0051094	positive regulation of developmental process	0.0001343	0.5618	0.02965	0.2644	35	1323	ACHE,BCL11A,GCNT2,SSBP3,MAP3K5,GDPD5,SRGAP2C,KAT2B,BMPR2,SERPINE2,SLC9B2,TSPO,SUCO,FKBP1B,CA2,PNP,VEGFA,SOX6,FOXO3,CYSLTR2,IFITM1,H2AFY,AQP1,LGALS3,PPP2R5B,THRB,CD36,CAPRIN2,EIF5A,GLIPR2,CTNNA1,MAP2K2,ENG,MMD,CPEB1
GO:0010558	negative regulation of macromolecule biosynthetic process	0.0001346	0.5633	0.02965	0.2644	39	1540	MXD3,WWC3,ESR2,BCL11A,DDIT3,CREBRF,HIST1H2AK,HIST1H2AJ,HIST1H2AM,BMPR2,HIST1H3A,HIST1H3C,NFIA,HIST1H3B,HIST1H4A,NFIC,NFIX,JAZF1,FHL2,VEGFA,SOX6,CPEB2,FOXO1,FOXO3,MARCH8,H2AFY,CBX4,IFI27,MOSPD1,THRB,TRIB3,CD36,CPEB4,CAPRIN2,HIST1H1B,HIST1H2AD,MAP2K2,ENG,CPEB1
GO:0031327	negative regulation of cellular biosynthetic process	0.0001535	0.6423	0.0309	0.2756	40	1605	MXD3,WWC3,ESR2,BCL11A,DDIT3,CREBRF,HIST1H2AK,HIST1H2AJ,HIST1H2AM,BMPR2,HIST1H3A,HIST1H3C,NFIA,HIST1H3B,HIST1H4A,NFIC,NFIX,TSPO,JAZF1,FHL2,VEGFA,SOX6,CPEB2,FOXO1,FOXO3,H2AFY,CBX4,IFI27,MOSPD1,THRB,TRIB3,CD36,CPEB4,CAPRIN2,HIST1H1B,AKR1C3,HIST1H2AD,MAP2K2,ENG,CPEB1
GO:0034599	cellular response to oxidative stress	0.000161	0.6736	0.0309	0.2756	12	247	TPM1,GCH1,MAP3K5,KAT2B,PKD2,CPEB2,FOXO1,FOXO3,FAS,AQP1,CD36,AKR1C3
GO:0021815	modulation of microtubule cytoskeleton involved in cerebral cortex radial glia guided migration	0.0001894	0.7923	0.0309	0.2756	2	2	SRGAP2C,SRGAP2
GO:0021816	extension of a leading process involved in cell motility in cerebral cortex radial glia guided migration	0.0001894	0.7923	0.0309	0.2756	2	2	SRGAP2C,SRGAP2
GO:0014916	regulation of lung blood pressure	0.0001894	0.7923	0.0309	0.2756	2	2	GCH1,BMPR2
GO:0048878	chemical homeostasis	0.000195	0.8159	0.0309	0.2756	31	1136	CNNM2,ATP7B,HLA-DRB1,WNK1,LYST,AKR1C1,DDIT3,MS4A2,CLIC2,GCLM,PKD2,TSPO,FKBP1B,CA2,VEGFA,FOXO1,FOXO3,HECTD4,SYBU,GRINA,FAS,AQP1,AQP3,RHCE,RHD,NDFIP1,SLC18A2,CD36,MCUR1,EIF5A,IRS2
GO:0010629	negative regulation of gene expression	0.0002041	0.8539	0.0309	0.2756	40	1627	MXD3,WWC3,ESR2,BCL11A,DDIT3,CREBRF,HIST1H2AK,HIST1H2AJ,HIST1H2AM,SERPINE2,HIST1H3A,HIST1H3C,NFIA,HIST1H3B,HIST1H4A,NFIC,NFIX,JAZF1,FHL2,VEGFA,SOX6,CPEB2,FOXO1,FOXO3,H2AFY,CBX4,CR1L,IFI27,MOSPD1,NDFIP1,THRB,TRIB3,CD36,CPEB4,CAPRIN2,HIST1H1B,HIST1H2AD,MAP2K2,ENG,CPEB1
GO:0006837	serotonin transport	0.0002068	0.8653	0.0309	0.2756	4	22	FCER1A,FCGR2A,LGALS3,SLC18A2
GO:0015695	organic cation transport	0.0002068	0.8653	0.0309	0.2756	4	22	RHCE,RHD,SLC22A16,SLC22A4
GO:0000183	chromatin silencing at rDNA	0.0002319	0.9701	0.03345	0.2983	5	41	HIST1H3A,HIST1H3C,HIST1H3B,HIST1H4A,H2AFY
GO:0051172	negative regulation of nitrogen compound metabolic process	0.0002406	1	0.03356	0.2992	40	1640	MXD3,WWC3,ESR2,BCL11A,DDIT3,CREBRF,HIST1H2AK,HIST1H2AJ,HIST1H2AM,BMPR2,HIST1H3A,HIST1H3C,NFIA,HIST1H3B,HIST1H4A,NFIC,NFIX,TSPO,JAZF1,FHL2,VEGFA,SOX6,CPEB2,FOXO1,FOXO3,H2AFY,CBX4,IFI27,MOSPD1,NDFIP1,THRB,TRIB3,CD36,CPEB4,CAPRIN2,HIST1H1B,HIST1H2AD,MAP2K2,ENG,CPEB1
GO:0097164	ammonium ion metabolic process	0.0002749	1	0.0371	0.3308	10	188	ACHE,GCH1,MBOAT2,AKR1C1,SGPP1,SMOX,SPTLC2,SLC22A4,AKR1C3,HDC
GO:0040029	regulation of gene expression, epigenetic	0.0003074	1	0.03928	0.3502	12	265	HIST1H2AK,HIST1H2AJ,HIST1H2AM,KAT2B,HIST1H3A,HIST1H3C,SLC50A1,HIST1H3B,HIST1H4A,H2AFY,HIST1H2AD,MAP2K2
GO:0000122	negative regulation of transcription by RNA polymerase II	0.0003098	1	0.03928	0.3502	24	806	WWC3,ESR2,BCL11A,DDIT3,CREBRF,HIST1H3C,NFIA,NFIC,NFIX,JAZF1,FHL2,VEGFA,SOX6,FOXO1,FOXO3,H2AFY,CBX4,IFI27,MOSPD1,THRB,TRIB3,CD36,HIST1H1B,ENG
GO:0042127	regulation of cell proliferation	0.0003319	1	0.04084	0.3642	40	1666	TPM1,CDKN2C,HLA-A,HLA-DRB1,ESR2,ADGRG1,BCL2L1,GCNT2,SSBP3,MAP3K5,HP1BP3,KAT2B,BMPR2,SERPINE2,CLC,PKD2,TSPO,AFDN,PPP1R9B,PNP,VEGFA,FOXO1,FOXO3,IFITM1,ZMIZ1,PRC1,FAS,AQP1,LGALS3,NDFIP1,OPTN,THRB,EIF5A,CD44,AKR1C3,IRS2,CTNNA1,MORC3,ENG,CPEB1

## Sheet: GO_MF_FL
ID	Name	p-value	q-value Bonferroni	q-value FDR B&H	q-value FDR B&Y	Hit Count in Query List	Hit Count in Genome	Hit in Query List
GO:0003723	RNA binding	1.869e-33	2.69e-30	2.69e-30	2.111e-29	148	1632	NOLC1,DDX19B,RIDA,GTPBP4,HSP90B1,CCT3,MRPL12,FBL,MRM1,PARK7,MRPS35,LRRC59,NOL10,RPS23,MDH2,PFN1,TLR8,TUFM,NUFIP1,KNOP1,LRRC47,TXN,EFTUD2,PNPT1,UTP15,PKM,NOL7,ACAA2,ALDOA,EIF3M,PUS7,SYNCRIP,HSP90AB1,VIM,FLNA,XRN2,NAA15,WDR36,MRPS28,NOP16,RTCB,LIN28B,ANXA2,MRPL58,TRMT1,BCCIP,GEMIN5,ZCCHC17,SAMHD1,FAM98A,LYAR,PPIB,DIS3,TRUB2,ARCN1,ESF1,MSN,IGF2BP1,IGF2BP3,CRYZ,TRMT6,NOP14,MRPL15,CELF2,TSR1,TIMM50,MR…
GO:0019899	enzyme binding	9.981e-08	0.0001436	7.182e-05	0.0005637	102	1929	HSP90B1,ABAT,PDE3B,FBL,CTSC,CORO1C,PARK7,HMGA1,PFN1,HDHD2,ADD3,NUFIP1,PHB,TXN,SORT1,CITED2,SERPINB6,MAVS,PIK3R1,ATXN10,PLEK,PUS7,VDAC1,HSP90AB1,CUL4A,VIM,FLNA,TRIB2,DERL1,HACD3,ANXA2,ANXA5,RHOBTB3,EGLN1,RICTOR,APP,PPIB,YWHAB,SLC2A3,MSN,ARHGDIB,NOP14,RANGRF,VCAN,DZIP3,PRKAR2A,PRKCA,APPL1,EIF3I,ATP1B1,ATP2A2,MYC,DHX36,PRTN3,NCKAP1,IQGAP2,CCDC50,ITGAV,RUVBL2,STAP1,SMYD2,STAT3,STAT5A,IQGAP1,KSR1,BNIP…
GO:0017076	purine nucleotide binding	1.206e-06	0.001736	0.0005787	0.004542	96	1879	GPHN,NOLC1,DDX19B,UBA5,GTPBP4,RFK,HSP90B1,PDE3B,HK2,CCT3,PDK1,ACLY,DNAJA2,OBSCN,PFAS,CHD4,PFN1,PGK1,WARS2,ADCY7,TUFM,EFTUD2,TUBB1,PRKD3,GUF1,ACSM3,UBE2E2,AHCY,PKLR,PKM,AK2,ABCG2,HSPA4,HSP90AB1,TRIB2,RTCB,HSPA4L,RHOBTB3,BAG3,CCT7,SAMHD1,CHD7,PAICS,GRPEL1,IARS2,GTPBP8,TSR1,MTHFD1,TTLL4,TBK1,EIF5B,CCT8,PRKAR2A,PRKCA,ATP1B1,GFM1,ATP2A2,TNIK,DHX36,ATR,STK26,BMS1,NAIP,PSMC4,DARS,MCCC2,RUVBL2,DDX10,TUBB…
GO:0030554	adenyl nucleotide binding	4.572e-06	0.006578	0.001613	0.01266	80	1530	GPHN,NOLC1,DDX19B,UBA5,RFK,HSP90B1,PDE3B,HK2,CCT3,PDK1,ACLY,DNAJA2,OBSCN,PFAS,CHD4,PFN1,PGK1,WARS2,ADCY7,PRKD3,ACSM3,UBE2E2,AHCY,PKLR,PKM,AK2,ABCG2,HSPA4,HSP90AB1,TRIB2,RTCB,HSPA4L,RHOBTB3,BAG3,CCT7,CHD7,PAICS,GRPEL1,IARS2,MTHFD1,TTLL4,TBK1,CCT8,PRKAR2A,PRKCA,ATP1B1,ATP2A2,TNIK,DHX36,ATR,STK26,BMS1,NAIP,PSMC4,DARS,MCCC2,RUVBL2,DDX10,STK10,KSR1,SUPV3L1,DDX18,MAPKAPK3,GLUD2,ATP11A,SLC27A2,RIOK1,GAT…
GO:0043021	ribonucleoprotein complex binding	5.603e-06	0.008063	0.001613	0.01266	15	120	RPN2,IMPACT,GUF1,PRMT5,NAA15,MRPL58,RICTOR,TIMM50,WDR12,SNRPD1,ERAL1,C1QBP,OXA1L,EIF1AX,PES1
GO:0032549	ribonucleoside binding	7.411e-06	0.01066	0.001773	0.01392	91	1831	GPHN,NOLC1,DDX19B,UBA5,GTPBP4,RFK,HSP90B1,HK2,CCT3,PDK1,ACLY,DNAJA2,OBSCN,PFAS,CHD4,PGK1,WARS2,ADCY7,TUFM,EFTUD2,TUBB1,PRKD3,GUF1,ACSM3,UBE2E2,PKLR,PKM,AK2,POLR1B,ABCG2,HSPA4,HSP90AB1,TRIB2,RTCB,HSPA4L,RHOBTB3,CCT7,CHD7,PAICS,IARS2,POLR3B,GTPBP8,TSR1,MTHFD1,TTLL4,TBK1,EIF5B,CCT8,PRKCA,ATP1B1,GFM1,ATP2A2,TNIK,DHX36,ATR,STK26,BMS1,NAIP,PSMC4,DARS,MCCC2,RUVBL2,DDX10,TUBB6,STK10,KSR1,ERAL1,SUPV3L1,DD…
GO:0001882	nucleoside binding	8.626e-06	0.01241	0.001773	0.01392	91	1838	GPHN,NOLC1,DDX19B,UBA5,GTPBP4,RFK,HSP90B1,HK2,CCT3,PDK1,ACLY,DNAJA2,OBSCN,PFAS,CHD4,PGK1,WARS2,ADCY7,TUFM,EFTUD2,TUBB1,PRKD3,GUF1,ACSM3,UBE2E2,PKLR,PKM,AK2,POLR1B,ABCG2,HSPA4,HSP90AB1,TRIB2,RTCB,HSPA4L,RHOBTB3,CCT7,CHD7,PAICS,IARS2,POLR3B,GTPBP8,TSR1,MTHFD1,TTLL4,TBK1,EIF5B,CCT8,PRKCA,ATP1B1,GFM1,ATP2A2,TNIK,DHX36,ATR,STK26,BMS1,NAIP,PSMC4,DARS,MCCC2,RUVBL2,DDX10,TUBB6,STK10,KSR1,ERAL1,SUPV3L1,DD…
GO:0044877	macromolecular complex binding	1.323e-05	0.01904	0.002134	0.01675	82	1626	MCMBP,RPN2,PDK1,CORO1C,MAX,IMPACT,CHD4,HMGA1,HMGN3,PLAC8,CITED2,S100A8,S100A9,GUF1,FBN1,FCER1G,PIK3R1,PRMT5,PKM,AIF1,GPNMB,MMP9,MMP14,HSPA4,VDAC1,HSP90AB1,MPO,VIM,FLNA,NAA15,ICAM4,BAG3,MRPL58,RICTOR,CHD7,GATA5,SKIL,PPIB,YWHAB,TIMM50,SMARCC1,WDR12,ATP1B1,SNRPD1,CTSS,PROS1,MYC,ATR,NCKAP1,IQGAP2,VPS33A,BCKDHB,TUBGCP2,ITGA5,NDUFA9,RUVBL2,SMYD2,STAT3,WDR43,IQGAP1,SACS,ERAL1,C1QBP,KPNB1,DOCK2,ARID3A,KR…
GO:0032555	purine ribonucleotide binding	1.497e-05	0.02154	0.002134	0.01675	91	1864	GPHN,NOLC1,DDX19B,UBA5,GTPBP4,RFK,HSP90B1,PDE3B,HK2,CCT3,PDK1,ACLY,DNAJA2,OBSCN,PFAS,CHD4,PGK1,WARS2,ADCY7,TUFM,EFTUD2,TUBB1,PRKD3,GUF1,ACSM3,UBE2E2,PKLR,PKM,AK2,ABCG2,HSPA4,HSP90AB1,TRIB2,RTCB,HSPA4L,RHOBTB3,CCT7,CHD7,PAICS,IARS2,GTPBP8,TSR1,MTHFD1,TTLL4,TBK1,EIF5B,CCT8,PRKAR2A,PRKCA,ATP1B1,GFM1,ATP2A2,TNIK,DHX36,ATR,STK26,BMS1,NAIP,PSMC4,DARS,MCCC2,RUVBL2,DDX10,TUBB6,STK10,KSR1,ERAL1,SUPV3L1,DD…
GO:0035639	purine ribonucleoside triphosphate binding	1.595e-05	0.02295	0.002134	0.01675	89	1815	GPHN,NOLC1,DDX19B,UBA5,GTPBP4,RFK,HSP90B1,HK2,CCT3,PDK1,ACLY,DNAJA2,OBSCN,PFAS,CHD4,PGK1,WARS2,ADCY7,TUFM,EFTUD2,TUBB1,PRKD3,GUF1,ACSM3,UBE2E2,PKLR,PKM,AK2,ABCG2,HSPA4,HSP90AB1,TRIB2,RTCB,HSPA4L,RHOBTB3,CCT7,CHD7,PAICS,IARS2,GTPBP8,TSR1,MTHFD1,TTLL4,TBK1,EIF5B,CCT8,PRKCA,ATP1B1,GFM1,ATP2A2,TNIK,DHX36,ATR,STK26,BMS1,NAIP,PSMC4,DARS,MCCC2,RUVBL2,DDX10,TUBB6,STK10,KSR1,ERAL1,SUPV3L1,DDX18,MAPKAPK3,G…
GO:0030515	snoRNA binding	1.979e-05	0.02848	0.002134	0.01675	7	28	NUFIP1,NOP14,TSR1,BMS1,WDR3,HEATR1,DDX21
GO:0032553	ribonucleotide binding	2.081e-05	0.02995	0.002134	0.01675	91	1880	GPHN,NOLC1,DDX19B,UBA5,GTPBP4,RFK,HSP90B1,PDE3B,HK2,CCT3,PDK1,ACLY,DNAJA2,OBSCN,PFAS,CHD4,PGK1,WARS2,ADCY7,TUFM,EFTUD2,TUBB1,PRKD3,GUF1,ACSM3,UBE2E2,PKLR,PKM,AK2,ABCG2,HSPA4,HSP90AB1,TRIB2,RTCB,HSPA4L,RHOBTB3,CCT7,CHD7,PAICS,IARS2,GTPBP8,TSR1,MTHFD1,TTLL4,TBK1,EIF5B,CCT8,PRKAR2A,PRKCA,ATP1B1,GFM1,ATP2A2,TNIK,DHX36,ATR,STK26,BMS1,NAIP,PSMC4,DARS,MCCC2,RUVBL2,DDX10,TUBB6,STK10,KSR1,ERAL1,SUPV3L1,DD…
GO:0032550	purine ribonucleoside binding	2.091e-05	0.03009	0.002134	0.01675	89	1828	GPHN,NOLC1,DDX19B,UBA5,GTPBP4,RFK,HSP90B1,HK2,CCT3,PDK1,ACLY,DNAJA2,OBSCN,PFAS,CHD4,PGK1,WARS2,ADCY7,TUFM,EFTUD2,TUBB1,PRKD3,GUF1,ACSM3,UBE2E2,PKLR,PKM,AK2,ABCG2,HSPA4,HSP90AB1,TRIB2,RTCB,HSPA4L,RHOBTB3,CCT7,CHD7,PAICS,IARS2,GTPBP8,TSR1,MTHFD1,TTLL4,TBK1,EIF5B,CCT8,PRKCA,ATP1B1,GFM1,ATP2A2,TNIK,DHX36,ATR,STK26,BMS1,NAIP,PSMC4,DARS,MCCC2,RUVBL2,DDX10,TUBB6,STK10,KSR1,ERAL1,SUPV3L1,DDX18,MAPKAPK3,G…
GO:0051082	unfolded protein binding	2.107e-05	0.03033	0.002134	0.01675	13	103	HSP90B1,CCT3,DNAJA2,HSP90AB1,CCT7,PPIB,GRPEL1,CCT8,RUVBL2,CANX,TRAP1,LMAN1,NDUFAF1
GO:0001883	purine nucleoside binding	2.225e-05	0.03201	0.002134	0.01675	89	1831	GPHN,NOLC1,DDX19B,UBA5,GTPBP4,RFK,HSP90B1,HK2,CCT3,PDK1,ACLY,DNAJA2,OBSCN,PFAS,CHD4,PGK1,WARS2,ADCY7,TUFM,EFTUD2,TUBB1,PRKD3,GUF1,ACSM3,UBE2E2,PKLR,PKM,AK2,ABCG2,HSPA4,HSP90AB1,TRIB2,RTCB,HSPA4L,RHOBTB3,CCT7,CHD7,PAICS,IARS2,GTPBP8,TSR1,MTHFD1,TTLL4,TBK1,EIF5B,CCT8,PRKCA,ATP1B1,GFM1,ATP2A2,TNIK,DHX36,ATR,STK26,BMS1,NAIP,PSMC4,DARS,MCCC2,RUVBL2,DDX10,TUBB6,STK10,KSR1,ERAL1,SUPV3L1,DDX18,MAPKAPK3,G…
GO:0042802	identical protein binding	3.122e-05	0.04492	0.002808	0.02204	70	1359	GPHN,RIDA,ABAT,CEBPD,MNS1,PDK1,CTSC,PARK7,MAX,HMGCS1,NUFIP1,MGST1,HPGD,AHCY,ABCG2,ATXN10,PLEK,MMP9,ALDOA,HOMER1,NAXE,VIM,FLNA,RCHY1,GNPNAT1,CCT7,APP,SKP2,PAICS,GRPEL1,SLC16A1,PRKAR2A,APPL1,ATIC,SNRPC,SORD,STK26,SRM,BCAT1,NCL,RUVBL2,STAT3,STK10,BNIP3,HPGDS,SUPV3L1,PRPF19,GOT2,ARID3A,GOPC,GRB2,RUNX1T1,LCP1,LDHA,LDHB,LGALS1,GSR,THBS1,NAMPT,OXA1L,LMAN1,TKT,QPRT,PRDX1,HEY2,ROBO1,PSME3,LYZ,ENO1,SMAD6
GO:0032559	adenyl ribonucleotide binding	3.63e-05	0.05223	0.003073	0.02412	76	1518	GPHN,NOLC1,DDX19B,UBA5,RFK,HSP90B1,PDE3B,HK2,CCT3,PDK1,ACLY,DNAJA2,OBSCN,PFAS,CHD4,PGK1,WARS2,ADCY7,PRKD3,ACSM3,UBE2E2,PKLR,PKM,AK2,ABCG2,HSPA4,HSP90AB1,TRIB2,RTCB,HSPA4L,RHOBTB3,CCT7,CHD7,PAICS,IARS2,MTHFD1,TTLL4,TBK1,CCT8,PRKAR2A,PRKCA,ATP1B1,ATP2A2,TNIK,DHX36,ATR,STK26,BMS1,NAIP,PSMC4,DARS,MCCC2,RUVBL2,DDX10,STK10,KSR1,SUPV3L1,DDX18,MAPKAPK3,GLUD2,ATP11A,SLC27A2,RIOK1,GATC,DICER1,ATP8B2,ACTR2,…
GO:0048029	monosaccharide binding	4.042e-05	0.05817	0.003231	0.02536	11	80	HK2,ALDOA,EGLN1,GNPNAT1,SLC2A3,GPI,LGALS1,LMAN1,TKT,GYG1,OGFOD1
GO:0051287	NAD binding	6.717e-05	0.09666	0.005087	0.03993	9	57	ME2,HPGD,AHCY,IDH3A,CRYZ,SORD,PHGDH,LDHA,LDHB
GO:0005524	ATP binding	7.572e-05	0.109	0.005448	0.04277	73	1475	GPHN,NOLC1,DDX19B,UBA5,RFK,HSP90B1,HK2,CCT3,PDK1,ACLY,DNAJA2,OBSCN,PFAS,CHD4,PGK1,WARS2,ADCY7,PRKD3,ACSM3,UBE2E2,PKLR,PKM,AK2,ABCG2,HSPA4,HSP90AB1,TRIB2,RTCB,HSPA4L,RHOBTB3,CCT7,CHD7,PAICS,IARS2,MTHFD1,TTLL4,TBK1,CCT8,PRKCA,ATP1B1,ATP2A2,TNIK,DHX36,ATR,STK26,BMS1,NAIP,PSMC4,DARS,MCCC2,RUVBL2,DDX10,STK10,KSR1,SUPV3L1,DDX18,MAPKAPK3,ATP11A,SLC27A2,RIOK1,GATC,DICER1,ATP8B2,ACTR2,TGFBR1,TRAP1,ABCE1,P…
GO:0016209	antioxidant activity	0.0001314	0.1891	0.009003	0.07067	10	76	PARK7,S100A8,S100A9,MGST1,PRDX5,GSTO1,MPO,FAM213A,GSR,PRDX1
GO:0016765	transferase activity, transferring alkyl or aryl (other than methyl) groups	0.0001494	0.2151	0.009612	0.07544	9	63	PGGT1B,MGST1,GSTO1,NUS1,SRM,HPGDS,DHPS,RABGGTB,GSTP1
GO:0016829	lyase activity	0.0001536	0.2211	0.009612	0.07544	17	195	UBA5,ACO2,PARK7,HMGA1,ME2,ADCY7,UMPS,FH,ALDOA,ALDOC,HACD3,PAICS,CENPV,CTH,ECHDC1,BCKDHB,ENO1
GO:0043022	ribosome binding	0.0002685	0.3864	0.0161	0.1264	8	54	RPN2,IMPACT,GUF1,NAA15,MRPL58,RICTOR,C1QBP,OXA1L
GO:0050786	RAGE receptor binding	0.0003947	0.568	0.02272	0.1783	4	12	S100A8,S100A9,S100A12,FPR1
GO:0032403	protein complex binding	0.0004404	0.6338	0.02438	0.1913	54	1071	PDK1,CORO1C,MAX,CHD4,HMGN3,S100A8,S100A9,FBN1,FCER1G,PIK3R1,PRMT5,PKM,AIF1,GPNMB,MMP9,MMP14,HSPA4,VDAC1,HSP90AB1,VIM,FLNA,ICAM4,BAG3,SKIL,PPIB,YWHAB,SMARCC1,ATP1B1,CTSS,PROS1,MYC,ATR,NCKAP1,IQGAP2,VPS33A,BCKDHB,TUBGCP2,ITGA5,NDUFA9,SMYD2,WDR43,IQGAP1,SACS,KPNB1,DOCK2,KRT19,LCP1,ACTR2,TGFBR1,LRPPRC,THBS1,LYN,EPCAM,HCLS1
GO:0008135	translation factor activity, RNA binding	0.0005314	0.7647	0.02832	0.2223	10	90	TUFM,EIF3M,MRPL58,EIF5B,EIF3G,EIF3I,GFM1,EIF2B3,EIF1AX,EIF2S3
GO:0051020	GTPase binding	0.0007314	1	0.03759	0.295	22	327	CORO1C,PFN1,FLNA,ANXA2,RHOBTB3,ARHGDIB,RANGRF,NCKAP1,IQGAP2,IQGAP1,BNIP3,TBC1D4,TBC1D12,DIAPH2,DENND5A,RABGGTB,KPNB1,TNPO1,IPO5,DMXL2,LCP1,ENO1
GO:0030246	carbohydrate binding	0.000888	1	0.04377	0.3436	20	289	HK2,CLEC5A,CLEC7A,FCN1,CRYBG1,ALDOA,EGLN1,GNPNAT1,SLC2A3,VCAN,SORD,GBE1,GPI,CANX,OLR1,LGALS1,LMAN1,TKT,GYG1,OGFOD1
GO:0015037	peptide disulfide oxidoreductase activity	0.0009908	1	0.04377	0.3436	3	7	TXN,GSTO1,GSR
GO:0097177	mitochondrial ribosome binding	0.001024	1	0.04377	0.3436	2	2	C1QBP,OXA1L
GO:0004743	pyruvate kinase activity	0.001024	1	0.04377	0.3436	2	2	PKLR,PKM
GO:0016830	carbon-carbon lyase activity	0.001034	1	0.04377	0.3436	7	51	ME2,UMPS,ALDOA,ALDOC,PAICS,ECHDC1,BCKDHB
GO:0003743	translation initiation factor activity	0.001034	1	0.04377	0.3436	7	51	EIF3M,EIF5B,EIF3G,EIF3I,EIF2B3,EIF1AX,EIF2S3

## Sheet: GO_MF_AB
ID	Name	p-value	q-value Bonferroni	q-value FDR B&H	q-value FDR B&Y	Hit Count in Query List	Hit Count in Genome	Hit in Query List
GO:0008519	ammonium transmembrane transporter activity	2.14e-06	0.001999	0.001999	0.01483	6	29	AQP1,RHCE,RHD,SLC22A16,SLC18A2,SLC22A4
GO:0019863	IgE binding	2.414e-05	0.02254	0.01127	0.08361	3	5	FCER1A,MS4A2,LGALS3
GO:0019763	immunoglobulin receptor activity	0.0001311	0.1225	0.03911	0.2901	3	8	FCER1A,MS4A2,FCGR2A
GO:0019899	enzyme binding	0.0002033	0.1899	0.03911	0.2901	45	1929	CDKN2C,WWC3,ESR2,RNF144A,CDK19,BCL2L1,RNF217,WNK1,MAP3K5,HIST1H2AK,HIST1H2AM,SRGAP2C,KAT2B,STXBP1,MS4A2,GCLM,PKD2,FAM83D,AFDN,PPP1R9B,PLSCR4,FOXO1,FOXO3,RANBP10,H2AFY,SRGAP2,CBX4,PRC1,FAS,MICALL1,FMNL3,OPTN,THRB,TRIB3,SLC18A2,SCARB2,CD44,HIST1H1B,LRP1,IRS2,TRAK2,SVIP,HACD1,STOM,RAB11FIP3
GO:0019865	immunoglobulin binding	0.0002832	0.2645	0.03911	0.2901	4	24	FCER1A,MS4A2,FCGR2A,LGALS3
GO:0044877	macromolecular complex binding	0.0003315	0.3097	0.03911	0.2901	39	1626	HLA-A,KIF26A,ACHE,HLA-DRB1,ADGRG1,HP1BP3,HDGFL3,KAT2B,FCER1A,MS4A2,HIST1H3C,HOOK1,FCGR2A,NFIA,FAM83D,PPP1R9B,CPEB2,FOXO1,FOXO3,GAS2L3,KIF21A,H2AFY,SYBU,CBX4,PRC1,FAS,LGALS3,THRB,CD36,CPEB4,EIF5A,CD44,HIST1H1B,LRP1,IRS2,CTNNA1,ENG,TNXB,CPEB1
GO:0000900	translation repressor activity, nucleic acid binding	0.0004949	0.4622	0.03911	0.2901	3	12	CPEB2,CPEB4,CPEB1
GO:0005496	steroid binding	0.0005082	0.4746	0.03911	0.2901	7	103	ESR2,AKR1C1,OSBPL2,TSPO,ALDH1A1,PAQR9,TSPO2
GO:0047718	indanol dehydrogenase activity	0.0005444	0.5085	0.03911	0.2901	2	3	AKR1C1,AKR1C3
GO:0019767	IgE receptor activity	0.0005444	0.5085	0.03911	0.2901	2	3	FCER1A,MS4A2
GO:0015226	carnitine transmembrane transporter activity	0.0005444	0.5085	0.03911	0.2901	2	3	SLC22A16,SLC22A4
GO:0015199	amino-acid betaine transmembrane transporter activity	0.0005444	0.5085	0.03911	0.2901	2	3	SLC22A16,SLC22A4
GO:0047086	ketosteroid monooxygenase activity	0.0005444	0.5085	0.03911	0.2901	2	3	AKR1C1,AKR1C3
GO:0030291	protein serine/threonine kinase inhibitor activity	0.0006852	0.6399	0.04571	0.339	4	30	CDKN2C,WNK1,KAT2B,H2AFY
GO:0046982	protein heterodimerization activity	0.0008286	0.7739	0.04799	0.3559	18	571	HLA-A,BCL2L1,BCL11A,DDIT3,HIST1H2AK,HIST1H2AJ,HIST1H2AM,SRGAP2C,HIST1H3A,HIST1H3C,HIST1H3B,HIST1H4A,GCLM,VEGFA,SOX6,H2AFY,HIST1H2AD,CTNNA1
GO:0050840	extracellular matrix binding	0.0009572	0.894	0.04799	0.3559	5	56	ACHE,ADGRG1,VEGFA,LGALS3,BCAM
GO:0005372	water transmembrane transporter activity	0.0009932	0.9276	0.04799	0.3559	3	15	AQP1,AQP3,SLC14A1
GO:0047023	androsterone dehydrogenase activity	0.001079	1	0.04799	0.3559	2	4	AKR1C1,AKR1C3
GO:0047006	17-alpha,20-alpha-dihydroxypregn-4-en-3-one dehydrogenase activity	0.001079	1	0.04799	0.3559	2	4	AKR1C1,AKR1C3
GO:0005497	androgen binding	0.001079	1	0.04799	0.3559	2	4	TSPO,ALDH1A1
GO:0047115	trans-1,2-dihydrobenzene-1,2-diol dehydrogenase activity	0.001079	1	0.04799	0.3559	2	4	AKR1C1,AKR1C3

## Sheet: GO_CC_FL
ID	Name	p-value	q-value Bonferroni	q-value FDR B&H	q-value FDR B&Y	Hit Count in Query List	Hit Count in Genome	Hit in Query List
GO:0005739	mitochondrion	9.751e-26	6.845e-23	6.845e-23	4.882e-22	139	1769	RIDA,RFK,ABAT,HK2,AGPAT5,MRPL12,PDK1,ACOT9,ACLY,ACO2,MRM1,PARK7,APOOL,MRPS35,LRRC59,MDH2,TOMM5,ME2,WARS2,TUFM,MRPL35,PHB,TXN,SLC25A32,PNPT1,GUF1,ACSM3,MGST1,MAVS,MIPEP,LYPLA1,PKM,SFXN2,AK2,NOL7,ACAA2,ALAS1,TOMM40,ABCG2,ALDH1B1,FH,PRDX5,ALDOA,ALDOC,SLC25A17,NAXE,VDAC1,HSP90AB1,MPO,TMEM126A,MRPS28,HACD3,FAM210A,SLC25A33,COX6A1,FAM213A,MRPL58,TRMT1,CCT7,ATP5MPL,IDH3A,CPT2,PNKD,YWHAB,GRPEL1,IARS2,THE…
GO:0044429	mitochondrial part	1.183e-20	8.306e-18	4.153e-18	2.962e-17	90	987	ABAT,HK2,AGPAT5,MRPL12,PDK1,ACOT9,ACO2,PARK7,APOOL,MRPS35,LRRC59,MDH2,TOMM5,ME2,WARS2,TUFM,MRPL35,PHB,SLC25A32,PNPT1,GUF1,ACSM3,MGST1,MAVS,MIPEP,SFXN2,AK2,ACAA2,ALAS1,TOMM40,ABCG2,ALDH1B1,FH,PRDX5,NAXE,VDAC1,TMEM126A,MRPS28,SLC25A33,COX6A1,MRPL58,ATP5MPL,IDH3A,CPT2,GRPEL1,IARS2,THEM4,MRPL15,TIMM50,MRPS15,MRPS23,PRKCA,MRPL40,GFM1,MRPL11,SORD,ATP5MC1,MRPS27,BCKDHB,MCCC2,NDUFA9,STAT3,BNIP3,DIMT1,PMP…
GO:0005759	mitochondrial matrix	3.011e-20	2.114e-17	7.045e-18	5.025e-17	56	425	ABAT,MRPL12,PDK1,ACOT9,ACO2,PARK7,MRPS35,LRRC59,MDH2,ME2,WARS2,TUFM,MRPL35,GUF1,ACSM3,MIPEP,ACAA2,ALAS1,ALDH1B1,FH,PRDX5,NAXE,VDAC1,MRPS28,MRPL58,IDH3A,GRPEL1,IARS2,THEM4,MRPL15,MRPS15,MRPS23,MRPL40,GFM1,MRPL11,BCKDHB,MCCC2,NDUFA9,DIMT1,PMPCA,MRPL16,SDHAF3,ERAL1,SUPV3L1,C1QBP,DLAT,GOT2,TFAM,GSR,PPIF,MRPL2,MRPS7,LRPPRC,TRAP1,ABCE1,PRDX1
GO:0005730	nucleolus	2.208e-15	1.55e-12	3.875e-13	2.764e-12	75	891	NOLC1,GTPBP4,FBL,NOL10,RPS23,NUFIP1,KNOP1,UTP15,POLR1B,NOL7,TAF1D,FLNA,XRN2,WDR36,NOP16,LIN28B,USP28,NOB1,POLR1C,ZCCHC17,CHD7,LYAR,CPT2,SKP2,SP110,PCGF5,DIS3,ESF1,NOP14,TSR1,STON2,PDCD11,WDR12,MRPL40,MYC,RRP1B,RSL1D1,BMS1,MAK16,PNO1,NCL,NSUN2,PGRMC1,WDR43,WDR3,TWISTNB,DIMT1,RRS1,ZNF330,DDX18,DIAPH2,C1QBP,UTP20,PUM3,CHCHD1,EBNA1BP2,NOP2,GNL3,IPO5,ARID3A,GRWD1,NOC3L,EXOSC3,GRB2,HEATR1,RBM28,SDAD1,P…
GO:0030684	preribosome	1.756e-14	1.233e-11	2.466e-12	1.759e-11	20	70	FBL,WDR36,NOB1,NOP14,TSR1,PDCD11,WDR12,RRP1B,RSL1D1,BMS1,MAK16,WDR3,RRS1,UTP20,EBNA1BP2,HEATR1,SRFBP1,UTP11,PES1,MRTO4
GO:0031967	organelle envelope	3.102e-13	2.178e-10	3.63e-11	2.589e-10	84	1169	DDX19B,SEH1L,GTPBP4,HK2,AGPAT5,MNS1,MRPL12,SIGMAR1,PARK7,APOOL,MRPS35,LRRC59,MDH2,TOMM5,TUFM,MRPL35,PHB,SORT1,SLC25A32,PNPT1,GUF1,MGST1,MAVS,SFXN2,AK2,ACAA2,TOMM40,ABCG2,GSTO1,VDAC1,TMEM126A,MRPS28,RTCB,HACD3,SLC25A33,COX6A1,EI24,MRPL58,ATP5MPL,APP,CPT2,THEM4,MRPL15,TIMM50,MRPS15,MRPS23,PRKCA,MRPL40,MRPL11,SORD,CYBB,ATP5MC1,MRPS27,BCKDHB,NDUFA9,STAT3,WDR3,BNIP3,PMPCA,MRPL16,SDHAF3,ERAL1,TMEM97,CH…
GO:0031975	envelope	3.91e-13	2.745e-10	3.778e-11	2.695e-10	84	1174	DDX19B,SEH1L,GTPBP4,HK2,AGPAT5,MNS1,MRPL12,SIGMAR1,PARK7,APOOL,MRPS35,LRRC59,MDH2,TOMM5,TUFM,MRPL35,PHB,SORT1,SLC25A32,PNPT1,GUF1,MGST1,MAVS,SFXN2,AK2,ACAA2,TOMM40,ABCG2,GSTO1,VDAC1,TMEM126A,MRPS28,RTCB,HACD3,SLC25A33,COX6A1,EI24,MRPL58,ATP5MPL,APP,CPT2,THEM4,MRPL15,TIMM50,MRPS15,MRPS23,PRKCA,MRPL40,MRPL11,SORD,CYBB,ATP5MC1,MRPS27,BCKDHB,NDUFA9,STAT3,WDR3,BNIP3,PMPCA,MRPL16,SDHAF3,ERAL1,TMEM97,CH…
GO:0005743	mitochondrial inner membrane	4.306e-13	3.023e-10	3.778e-11	2.695e-10	50	507	MRPL12,PARK7,APOOL,MRPS35,MDH2,TUFM,MRPL35,PHB,SLC25A32,GUF1,MGST1,SFXN2,AK2,ACAA2,VDAC1,TMEM126A,MRPS28,SLC25A33,COX6A1,MRPL58,ATP5MPL,CPT2,THEM4,MRPL15,TIMM50,MRPS15,MRPS23,MRPL40,MRPL11,ATP5MC1,MRPS27,BCKDHB,NDUFA9,STAT3,PMPCA,MRPL16,ERAL1,CHCHD1,GOT2,SFXN4,HIGD2A,COX18,PPIF,MRPL2,MRPL4,MRPS7,TRAP1,OXA1L,NDUFAF1,LYN
GO:0031966	mitochondrial membrane	5.72e-13	4.015e-10	4.461e-11	3.182e-10	60	694	HK2,AGPAT5,MRPL12,PARK7,APOOL,MRPS35,MDH2,TOMM5,TUFM,MRPL35,PHB,SLC25A32,GUF1,MGST1,MAVS,SFXN2,AK2,ACAA2,TOMM40,ABCG2,VDAC1,TMEM126A,MRPS28,SLC25A33,COX6A1,MRPL58,ATP5MPL,CPT2,THEM4,MRPL15,TIMM50,MRPS15,MRPS23,PRKCA,MRPL40,MRPL11,SORD,ATP5MC1,MRPS27,BCKDHB,NDUFA9,STAT3,BNIP3,PMPCA,MRPL16,ERAL1,CHCHD1,GOT2,SFXN4,HIGD2A,COX18,PPIF,MRPL2,MRPL4,MRPS7,TRAP1,OXA1L,NDUFAF1,PEBP1,LYN
GO:0005740	mitochondrial envelope	7.145e-13	5.016e-10	5.016e-11	3.577e-10	62	736	HK2,AGPAT5,MRPL12,PARK7,APOOL,MRPS35,MDH2,TOMM5,TUFM,MRPL35,PHB,SLC25A32,PNPT1,GUF1,MGST1,MAVS,SFXN2,AK2,ACAA2,TOMM40,ABCG2,VDAC1,TMEM126A,MRPS28,SLC25A33,COX6A1,MRPL58,ATP5MPL,CPT2,THEM4,MRPL15,TIMM50,MRPS15,MRPS23,PRKCA,MRPL40,MRPL11,SORD,ATP5MC1,MRPS27,BCKDHB,NDUFA9,STAT3,BNIP3,PMPCA,MRPL16,SDHAF3,ERAL1,CHCHD1,GOT2,SFXN4,HIGD2A,COX18,PPIF,MRPL2,MRPL4,MRPS7,TRAP1,OXA1L,NDUFAF1,PEBP1,LYN
GO:0030529	intracellular ribonucleoprotein complex	1.214e-12	8.521e-10	7.101e-11	5.065e-10	62	745	MRPL12,FBL,IMPACT,MRPS35,RPS23,MRPL35,NUFIP1,EFTUD2,EIF3M,SYNCRIP,WDR36,MRPS28,NOB1,MRPL58,ZCCHC17,IGF2BP1,NOP14,MRPL15,TSR1,PPIL1,MRPS15,MRPS23,PDCD11,WDR12,MRPL40,EIF3G,EIF3I,SNRPC,SNRPD1,MRPL11,RRP1B,RSL1D1,BMS1,MRPS27,MAK16,NCL,RUVBL2,NSUN2,IQGAP1,WDR3,METAP1,MRPL16,RRS1,PRPF19,UTP20,EBNA1BP2,HNRNPDL,CANX,HEATR1,RBM28,SRFBP1,DICER1,MRPL2,MRPL4,MRPS7,LRPPRC,UTP11,PES1,NAT10,OGFOD1,MRTO4,SLIRP
GO:1990904	ribonucleoprotein complex	1.214e-12	8.521e-10	7.101e-11	5.065e-10	62	745	MRPL12,FBL,IMPACT,MRPS35,RPS23,MRPL35,NUFIP1,EFTUD2,EIF3M,SYNCRIP,WDR36,MRPS28,NOB1,MRPL58,ZCCHC17,IGF2BP1,NOP14,MRPL15,TSR1,PPIL1,MRPS15,MRPS23,PDCD11,WDR12,MRPL40,EIF3G,EIF3I,SNRPC,SNRPD1,MRPL11,RRP1B,RSL1D1,BMS1,MRPS27,MAK16,NCL,RUVBL2,NSUN2,IQGAP1,WDR3,METAP1,MRPL16,RRS1,PRPF19,UTP20,EBNA1BP2,HNRNPDL,CANX,HEATR1,RBM28,SRFBP1,DICER1,MRPL2,MRPL4,MRPS7,LRPPRC,UTP11,PES1,NAT10,OGFOD1,MRTO4,SLIRP
GO:0019866	organelle inner membrane	1.965e-12	1.379e-09	1.061e-10	7.567e-10	52	564	MRPL12,SIGMAR1,PARK7,APOOL,MRPS35,MDH2,TUFM,MRPL35,PHB,SLC25A32,GUF1,MGST1,SFXN2,AK2,ACAA2,VDAC1,TMEM126A,MRPS28,SLC25A33,COX6A1,MRPL58,ATP5MPL,CPT2,THEM4,MRPL15,TIMM50,MRPS15,MRPS23,MRPL40,MRPL11,ATP5MC1,MRPS27,BCKDHB,NDUFA9,STAT3,PMPCA,MRPL16,ERAL1,CHCHD1,GOT2,SFXN4,HIGD2A,COX18,PPIF,MRPL2,MRPL4,MRPS7,LRPPRC,TRAP1,OXA1L,NDUFAF1,LYN
GO:0043209	myelin sheath	1.751e-08	1.23e-05	8.782e-07	6.264e-06	24	202	CCT3,ACO2,MDH2,TUFM,PHB,PKM,GSTO1,VDAC1,ANXA2,COX6A1,CNRIP1,IDH3A,MSN,ATP1B1,PHGDH,DLAT,GOT2,GPI,CANX,LDHB,PEBP1,TKT,PRDX1,ENO1
GO:0030686	90S preribosome	6.887e-08	4.835e-05	3.223e-06	2.299e-05	9	27	NOP14,WDR12,RSL1D1,BMS1,WDR3,UTP20,HEATR1,SRFBP1,PES1
GO:0044452	nucleolar part	1.936e-07	0.0001359	8.496e-06	6.059e-05	13	70	FBL,UTP15,POLR1B,TAF1D,POLR1C,WDR12,NCL,WDR43,WDR3,TWISTNB,HEATR1,UTP4,PES1
GO:0005761	mitochondrial ribosome	8.348e-07	0.000586	3.256e-05	0.0002322	13	79	MRPL12,MRPS35,MRPL35,MRPS28,MRPL58,MRPL15,MRPS15,MRPS23,MRPL40,MRPL11,MRPL16,MRPL2,MRPS7
GO:0000313	organellar ribosome	8.348e-07	0.000586	3.256e-05	0.0002322	13	79	MRPL12,MRPS35,MRPL35,MRPS28,MRPL58,MRPL15,MRPS15,MRPS23,MRPL40,MRPL11,MRPL16,MRPL2,MRPS7
GO:0030688	preribosome, small subunit precursor	1.436e-06	0.001008	5.306e-05	0.0003784	5	8	NOB1,NOP14,TSR1,RRP1B,UTP20
GO:0005840	ribosome	4.129e-06	0.002898	0.0001367	0.0009752	22	235	MRPL12,MRPS35,RPS23,MRPL35,NUFIP1,MRPS28,MRPL58,ZCCHC17,MRPL15,MRPS15,MRPS23,MRPL40,MRPL11,RSL1D1,MRPS27,METAP1,MRPL16,CANX,MRPL2,MRPL4,MRPS7,MRTO4
GO:0042470	melanosome	4.285e-06	0.003008	0.0001367	0.0009752	14	105	HSP90B1,SERPINF1,AHCY,GPNMB,MMP14,HSP90AB1,ANXA2,ANXA2P2,PPIB,YWHAB,CANX,TMEM33,PRDX1,SLC45A2
GO:0048770	pigment granule	4.285e-06	0.003008	0.0001367	0.0009752	14	105	HSP90B1,SERPINF1,AHCY,GPNMB,MMP14,HSP90AB1,ANXA2,ANXA2P2,PPIB,YWHAB,CANX,TMEM33,PRDX1,SLC45A2
GO:0032040	small-subunit processome	7.073e-06	0.004966	0.0002159	0.00154	8	34	FBL,WDR36,NOP14,PDCD11,WDR3,UTP20,HEATR1,UTP11
GO:0030687	preribosome, large subunit precursor	7.683e-06	0.005394	0.0002247	0.001603	7	25	WDR12,RRP1B,MAK16,RRS1,EBNA1BP2,PES1,MRTO4
GO:0098798	mitochondrial protein complex	1.545e-05	0.01085	0.000434	0.003095	16	149	PDK1,PARK7,APOOL,TOMM5,PNPT1,TOMM40,COX6A1,ATP5MPL,TIMM50,ATP5MC1,BCKDHB,NDUFA9,SUPV3L1,DLAT,PPIF,NDUFAF1
GO:0001650	fibrillar center	0.0001005	0.07054	0.002713	0.01935	4	9	UTP15,NCL,WDR43,UTP4
GO:0044455	mitochondrial membrane part	0.0002677	0.1879	0.006961	0.04964	16	189	PARK7,APOOL,TOMM5,PHB,TOMM40,COX6A1,ATP5MPL,TIMM50,ATP5MC1,NDUFA9,BNIP3,COX18,PPIF,OXA1L,NDUFAF1,LYN
GO:0044391	ribosomal subunit	0.0003609	0.2534	0.009049	0.06454	15	175	MRPL12,MRPS35,RPS23,MRPS28,MRPL58,ZCCHC17,MRPL15,MRPS15,MRPS23,MRPL11,RSL1D1,MRPL16,MRPL2,MRPS7,MRTO4
GO:0098857	membrane microdomain	0.0004489	0.3152	0.01051	0.07492	23	343	CORO1C,PARK7,PGK1,FCER1G,VDAC1,ANXA2,APP,SLC2A3,RANGRF,PRKAR2A,PRKCA,ATP1B1,IQGAP1,PTPRC,KCNE3,ARID3A,CBL,LDHB,OLR1,TGFBR1,CD14,SPRED1,LYN
GO:0045121	membrane raft	0.0004489	0.3152	0.01051	0.07492	23	343	CORO1C,PARK7,PGK1,FCER1G,VDAC1,ANXA2,APP,SLC2A3,RANGRF,PRKAR2A,PRKCA,ATP1B1,IQGAP1,PTPRC,KCNE3,ARID3A,CBL,LDHB,OLR1,TGFBR1,CD14,SPRED1,LYN
GO:0000315	organellar large ribosomal subunit	0.0008722	0.6123	0.01913	0.1365	6	37	MRPL12,MRPL58,MRPL15,MRPL11,MRPL16,MRPL2
GO:0005762	mitochondrial large ribosomal subunit	0.0008722	0.6123	0.01913	0.1365	6	37	MRPL12,MRPL58,MRPL15,MRPL11,MRPL16,MRPL2
GO:0000177	cytoplasmic exosome (RNase complex)	0.0009387	0.659	0.01997	0.1424	4	15	PNPT1,DIS3,SUPV3L1,EXOSC3
GO:0045025	mitochondrial degradosome	0.0009846	0.6912	0.02033	0.145	2	2	PNPT1,SUPV3L1
GO:0048471	perinuclear region of cytoplasm	0.001081	0.7589	0.02168	0.1546	38	724	GTPBP4,HSP90B1,SERPINF1,SORT1,PIK3R1,AIF1,CCL2,ATXN10,PLD1,PRDX5,VIM,FLNA,ANXA2,APP,PPIB,YWHAB,MSN,MT1G,MT1H,IGF2BP1,MT1X,MT2A,PRKAR2A,PRKCA,EIF3G,ATP2A2,TRAPPC2L,CYBB,MYC,TNIK,SPP1,STK26,VPS33A,SRFBP1,CBL,LRPPRC,LYN,SLIRP
GO:0000314	organellar small ribosomal subunit	0.00151	1	0.02864	0.2043	5	28	MRPS35,MRPS28,MRPS15,MRPS23,MRPS7
GO:0005763	mitochondrial small ribosomal subunit	0.00151	1	0.02864	0.2043	5	28	MRPS35,MRPS28,MRPS15,MRPS23,MRPS7
GO:0005635	nuclear envelope	0.002004	1	0.03702	0.264	26	454	DDX19B,SEH1L,GTPBP4,AGPAT5,MNS1,SIGMAR1,LRRC59,SORT1,GSTO1,RTCB,HACD3,EI24,APP,MRPS15,MRPS23,CYBB,WDR3,BNIP3,TMEM97,KPNB1,TNPO1,IPO5,AKIRIN1,TMEM33,LRPPRC,MRTO4
GO:0005832	chaperonin-containing T-complex	0.002145	1	0.03776	0.2693	3	9	CCT3,CCT7,CCT8
GO:0005791	rough endoplasmic reticulum	0.002152	1	0.03776	0.2693	9	92	RPN2,CCL2,APP,RANGRF,CYBB,TMEM97,CANX,PEBP1,LYZ
GO:0001891	phagocytic cup	0.002416	1	0.04098	0.2923	4	19	AIF1,BIN2,SNX5,LCP1
GO:0005925	focal adhesion	0.002713	1	0.04098	0.2923	23	393	HSP90B1,CORO1C,HMGA1,PFN1,MMP14,VIM,FLNA,HACD3,ANXA5,EPB41L5,PPIB,YWHAB,MSN,PRKAR2A,NCKAP1,SNAP23,ITGA5,ITGAV,IQGAP1,FOCAD,PTPRC,LCP1,ACTR2
GO:0044445	cytosolic part	0.002722	1	0.04098	0.2923	16	235	CCT3,RPS23,NUFIP1,CCT7,ZCCHC17,CCT8,RSL1D1,NAIP,PSMC4,METAP1,MRPL4,MRTO4,HBE1,ENO1,HBG1,HBZ
GO:0042645	mitochondrial nucleoid	0.00278	1	0.04098	0.2923	6	46	LRRC59,TUFM,VDAC1,SUPV3L1,TFAM,LRPPRC
GO:0030956	glutamyl-tRNA(Gln) amidotransferase complex	0.002802	1	0.04098	0.2923	2	3	GATC,QRSL1
GO:0034455	t-UTP complex	0.002802	1	0.04098	0.2923	2	3	HEATR1,UTP4
GO:0070545	PeBoW complex	0.002802	1	0.04098	0.2923	2	3	WDR12,PES1
GO:0005967	mitochondrial pyruvate dehydrogenase complex	0.002802	1	0.04098	0.2923	2	3	PDK1,DLAT
GO:0005924	cell-substrate adherens junction	0.003173	1	0.04545	0.3242	23	398	HSP90B1,CORO1C,HMGA1,PFN1,MMP14,VIM,FLNA,HACD3,ANXA5,EPB41L5,PPIB,YWHAB,MSN,PRKAR2A,NCKAP1,SNAP23,ITGA5,ITGAV,IQGAP1,FOCAD,PTPRC,LCP1,ACTR2
GO:0009295	nucleoid	0.003458	1	0.04855	0.3463	6	48	LRRC59,TUFM,VDAC1,SUPV3L1,TFAM,LRPPRC
GO:0000178	exosome (RNase complex)	0.003553	1	0.04891	0.3488	4	21	PNPT1,DIS3,SUPV3L1,EXOSC3
GO:0030055	cell-substrate junction	0.003697	1	0.04991	0.3559	23	403	HSP90B1,CORO1C,HMGA1,PFN1,MMP14,VIM,FLNA,HACD3,ANXA5,EPB41L5,PPIB,YWHAB,MSN,PRKAR2A,NCKAP1,SNAP23,ITGA5,ITGAV,IQGAP1,FOCAD,PTPRC,LCP1,ACTR2

## Sheet: GO_CC_AB
ID	Name	p-value	q-value Bonferroni	q-value FDR B&H	q-value FDR B&Y	Hit Count in Query List	Hit Count in Genome	Hit in Query List
GO:0000786	nucleosome	1.796e-08	8.1e-06	5.08e-06	3.398e-05	12	105	HP1BP3,HIST1H2AK,HIST1H2AJ,HIST1H2AM,HIST1H3A,HIST1H3C,HIST1H3B,HIST1H4A,H1FX,H2AFY,HIST1H1B,HIST1H2AD
GO:0032993	protein-DNA complex	2.873e-08	1.296e-05	5.08e-06	3.398e-05	15	183	ESR2,DDIT3,HP1BP3,HIST1H2AK,HIST1H2AJ,HIST1H2AM,HIST1H3A,HIST1H3C,HIST1H3B,HIST1H4A,H1FX,POLE2,H2AFY,HIST1H1B,HIST1H2AD
GO:0044815	DNA packaging complex	3.379e-08	1.524e-05	5.08e-06	3.398e-05	12	111	HP1BP3,HIST1H2AK,HIST1H2AJ,HIST1H2AM,HIST1H3A,HIST1H3C,HIST1H3B,HIST1H4A,H1FX,H2AFY,HIST1H1B,HIST1H2AD
GO:0009897	external side of plasma membrane	8.612e-05	0.03884	0.00971	0.06496	14	310	HLA-A,HLA-DRB1,MAP3K5,SERPINE2,FCER1A,MS4A2,FCGR2A,FAS,CR1L,LGALS3,CD36,CD44,BCAM,ENG
GO:0098552	side of membrane	0.0002053	0.09258	0.01852	0.1239	18	510	HLA-A,HLA-C,HLA-DRB1,MAP3K5,SERPINE2,FCER1A,MS4A2,FCGR2A,PKD2,PPP1R9B,FAS,CR1L,LGALS3,CD36,CD44,BCAM,MAP2K2,ENG
GO:1990124	messenger ribonucleoprotein complex	0.000271	0.1222	0.02037	0.1363	3	10	CPEB2,CPEB4,CPEB1
GO:0071556	integral component of lumenal side of endoplasmic reticulum membrane	0.0005881	0.2652	0.03315	0.2218	4	29	HLA-A,HLA-C,HLA-DRB1,PKD2
GO:0098553	lumenal side of endoplasmic reticulum membrane	0.0005881	0.2652	0.03315	0.2218	4	29	HLA-A,HLA-C,HLA-DRB1,PKD2
GO:0098576	lumenal side of membrane	0.0009713	0.438	0.04867	0.3256	4	33	HLA-A,HLA-C,HLA-DRB1,PKD2
